# Supplementary material for: Synthesis of Stereoenriched Piperidines via Chemo-Enzymatic Dearomatization of Activated Pyridines
Source: PubMed Central journal article supplement (PMC9706572; doi:10.1021/jacs.2c07143), 2022-11-09
Supplement: ja2c07143_si_001.pdf [file ja2c07143_si_001.pdf]

# Supplementary Information for

## **Synthesis of stereo-enriched piperidines via chemo-enzymatic dearomatization of activated pyridines**

Vanessa Harawa, Thomas W. Thorpe, James R. Marshall, Jack J. Sangster, Amelia K. Gilio, Lucian Pirvu, Rachel S. Heath, Antonio Angelastro, James D. Finnigan, Simon J. Charnock, Jordan W. Nafie, Gideon Grogan, Roger C. Whitehead, Nicholas J. Turner\*.

\*Corresponding author. Email: [Nicholas.Turner@manchester.ac.uk](mailto:Nicholas.Turner@manchester.ac.uk)

### **This PDF file includes:**

Materials and Methods

Supplementary Text

Figs. S1 to S64

Tables S1 to S13

NMR Spectra

References

## Table of Contents

|                                                                                                                |     |
|----------------------------------------------------------------------------------------------------------------|-----|
| 1. General Analysis .....                                                                                      | 4   |
| 2. Biotransformations .....                                                                                    | 6   |
| 2.1. Time course screens with AmOx variants .....                                                              | 6   |
| 2.2. Screening 384 metagenomic IREDs panel protocol .....                                                      | 9   |
| 2.3. Biocatalytic cascade control experiments .....                                                            | 10  |
| 3. General procedure for biotransformations .....                                                              | 14  |
| 4. Absolute Configuration Determination .....                                                                  | 16  |
| 4.1. Commercial optically pure products: Analysis .....                                                        | 16  |
| 4.2. Literature comparison: Analysis .....                                                                     | 16  |
| 4.3. VCD: Analysis .....                                                                                       | 16  |
| 5. Preparative-Scale Procedure and Product Characterisation .....                                              | 17  |
| 5.1. General Method 1: preparative-scale procedure .....                                                       | 17  |
| 5.2. Deuterium Labelling Experiments .....                                                                     | 35  |
| 6. Cloning, expression, and purification protocols of biocatalysts .....                                       | 39  |
| 6.1. Amine oxidases .....                                                                                      | 39  |
| 6.2. IREDs .....                                                                                               | 40  |
| 5.2.1. EneIRED Amino Acid Sequence Information .....                                                           | 42  |
| 7. Protein Crystallization of EneIRED-07; Data Collection and Refinement .....                                 | 44  |
| 7.1. Gene expression and protein purification .....                                                            | 44  |
| 7.2. Protein crystallization .....                                                                             | 44  |
| 7.3. Data collection, structure solution and refinement .....                                                  | 44  |
| 7.4. Modelling .....                                                                                           | 45  |
| 8. GCMS Analysis: methods and retention times for THP substrates and piperidine products .....                 | 48  |
| 9. Chiral HPLC Analysis: methods and retention times for piperidine products .....                             | 81  |
| 10. Chiral GC Analysis: methods and retention times for piperidine products .....                              | 92  |
| 11. Chiral SFC Analysis: methods and retention times for piperidine products .....                             | 96  |
| 12. VCD Analysis: methods for piperidine products .....                                                        | 98  |
| 13. Substrate synthesis and characterisation .....                                                             | 147 |
| 13.1. General .....                                                                                            | 147 |
| 13.1.1. General Method 2: Suzuki–Miyaura Coupling for the preparation of pyridines .....                       | 147 |
| 13.1.2. General Method 3: <i>N</i> -alkylation for the preparation of pyridinium salts ( <b>1a-21a</b> ) ..... | 150 |
| 13.1.3. General Method 4: Pyridinium salt reduction for the preparation of THPs ( <b>1b-21b</b> ) .....        | 160 |

|       |                                                                                 |     |
|-------|---------------------------------------------------------------------------------|-----|
| 13.2. | General Method 5: Hydrogenation of THP for the preparation of racemic standards |     |
|       | 171                                                                             |     |
| 14.   | Compound $^1\text{H}$ NMR and $^{13}\text{C}$ NMR Spectra .....                 | 181 |

## 1. General Analysis

Solvents used were of HPLC grade and when necessary solvents were further dried over molecular sieves. Column chromatography was performed on silica gel (Fluka (Buchs, Switzerland), 220-440 mesh). Spectra from  $^1\text{H}$  and  $^{13}\text{C}$  NMR runs were recorded on a Bruker Avance 400 and 500 instruments (400 MHz for  $^1\text{H}$  and 100 MHz for  $^{13}\text{C}$ ; 500 MHz for  $^1\text{H}$  and 126 MHz for  $^{13}\text{C}$ ) in  $\text{CDCl}_3$  or  $\text{CD}_3\text{OD}$  or  $(\text{CD}_3)_2\text{SO}$  using residual protic solvent as an internal standard. Reported chemical shifts ( $\delta$ ) (in parts per million (ppm)) are relative to the residual protic solvent signal ( $\text{CHCl}_3$  in  $\text{CDCl}_3$ ,  $^1\text{H} = 7.26$ ;  $^{13}\text{C} = 77.0$ ;  $\text{CHD}_2\text{OD}$  in  $\text{CD}_3\text{OD}$ ,  $^1\text{H} = 3.31$ ;  $^{13}\text{C} = 49.0$ ;  $(\text{CHD}_2)_2\text{SO}$  in  $(\text{CD}_3)_2\text{SO}$ ,  $^1\text{H} = 2.50$ ;  $^{13}\text{C} = 39.52$ ). High-resolution mass spectrometry (HRMS) was recorded using a Waters LCT time-of-flight mass spectrometer, connected to a Waters Alliance LC (Waters, Milford, MA, USA). Data were processed with Waters Masslynx software.

Determination of optical rotations was performed on an AA-100 polarimeter at  $25^\circ\text{C}$  with the solvent and concentration stated. Chiral normal phase High Performance Liquid Chromatography (HPLC) was performed on an Agilent system (Santa Clara, CA, USA) equipped with a G1379A degasser, G1312A binary pump, a G1367A well plate autosampler unit, a G1316A temperature-controlled column compartment and a G1315C diode array detector. CHIRALPAK®IA, CHIRALPAK®IC and CHIRALPAK®IE Analytical (all Daicel (Osaka, Japan), 250mm length, 4.6 mm diameter, 5  $\mu\text{m}$  particle size) as well as CHIRALCEL®OD-H and CHIRALCEL®AD-H Analytical (Daicel (Osaka, Japan), 250 mm length, 4.6 mm diameter, 5  $\mu\text{m}$  particle size) columns were used. The typical injection volume was 10  $\mu\text{L}$  and chromatograms were monitored at 265 nm. All solvent mixtures are given in (v/v) ratios.

Chiral Supercritical Fluid Chromatography (SFC) screening and optimization was carried out using a Waters Acquity UPC2 system (Waters Corp, Milford, MA, USA). This system contained a photodiode array detector, column managers to allow six orthogonal columns to be run in series, a sample manager, and a fluid delivery module (liquid  $\text{CO}_2$  pump as well as a modifier pump). The system was controlled by MassLynx software.

Gas Chromatography (GC) analysis was performed on an Agilent 6850 GC (Agilent, Santa Clara, CA, USA) with a flame ionization detector (FID) and autosampler. Columns used include a 25 m CP-Chirasil-DEX CB column with 0.25 mm inner diameter and 0.25  $\mu\text{m}$  film thickness (Agilent, Santa



Clara, CA, USA); a 30 m  $\beta$ DEX-325 with 0.25 mm inner diameter and 0.25  $\mu$ m film thickness (Supeclo, Bellefont, PA, USA); a 30 m HP-1MS column with 0.32 mm inner diameter and 0.25  $\mu$ m film thickness (Agilent, Santa Clara, CA, USA) and an HP-1 column with 0.32 mm inner diameter and 0.25  $\mu$ m film thickness (Agilent, 6 Santa Clara, CA, USA). Gas chromatography–mass spectrometry (GCMS) analysis was performed on a HP-6890 Series GC coupled to a HP5973 MS detector, EI positive mode with helium as the carrier gas.

## 2. Biotransformations

### 2.1. Time course screens with AmOx variants

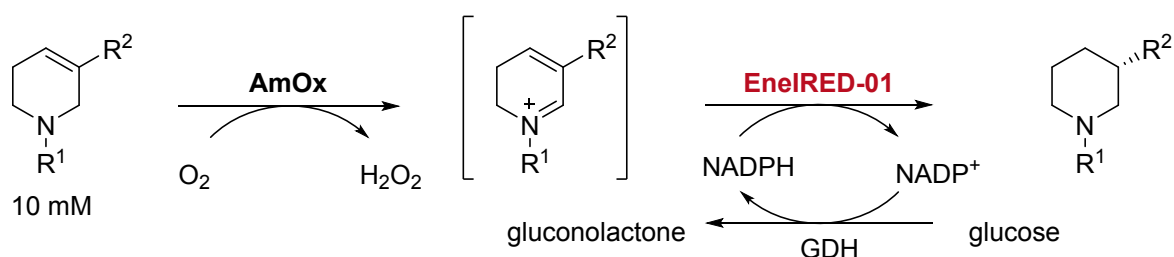

A 500  $\mu$ L reaction mixture contained D-glucose (50 mM), glucose dehydrogenase (GDH) (0.1 mg/mL, Codexis CDX-901), NADP<sup>+</sup> (0.5 mM), EneIRED-01 CFE (4 mg/mL), purified amine oxidase (AmOX) (0.5 mg/mL stored in 100 mM KPi pH 7.8) and THP (1.00 mmol, stock conc. = 1 M in dimethyl sulfoxide (DMSO)). The reaction volume was made up to 500  $\mu$ L with KPi buffer (100 mM, pH 7.0). Reactions were incubated at 30  $^{\circ}$ C with shaking at 200 r.p.m. for 0-16 h, after which they were quenched by the addition of 40  $\mu$ L of 10 M NaOH and extracted once with 500  $\mu$ L *tert*-butyl methyl ether (MTBE), dried over anhydrous MgSO<sub>4</sub> and analysed on GCMS.

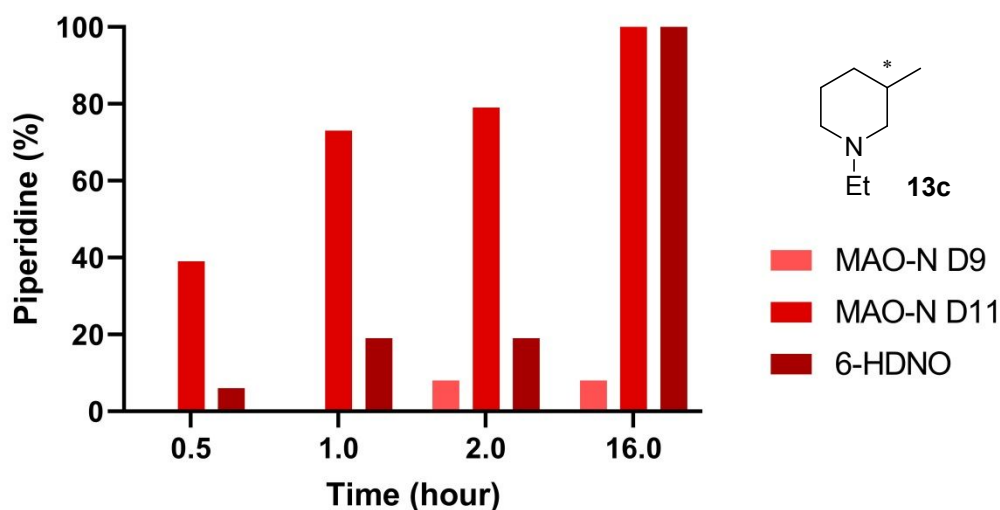

**Figure S1:** Comparison of AmOx variants. Reaction conditions: 10 mM **13b**, purified AmOx (0.5 mg/mL), EneIRED-01 CFE (4 mg/mL), glucose (50 mM), NADP<sup>+</sup> (0.5 mM), GDH-901 (0.1 mg/mL), 100 mM KPi pH 7.0, 30  $^{\circ}$ C, 200 r.p.m.

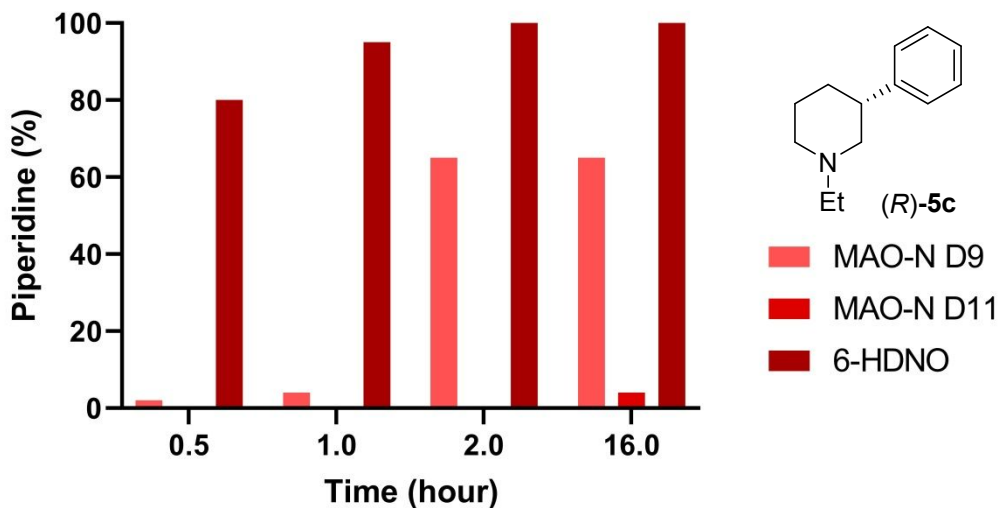

**Figure S2:** Comparison of AmOx variants. Reaction conditions: 10 mM **5b**, purified AmOx (0.5 mg/mL), EnelRED-01 CFE (4 mg/mL), glucose (50 mM), NADP<sup>+</sup> (0.5 mM), GDH-901 (0.1 mg/mL), 100 mM KPi pH 7.0, 30 °C, 200 r.p.m.

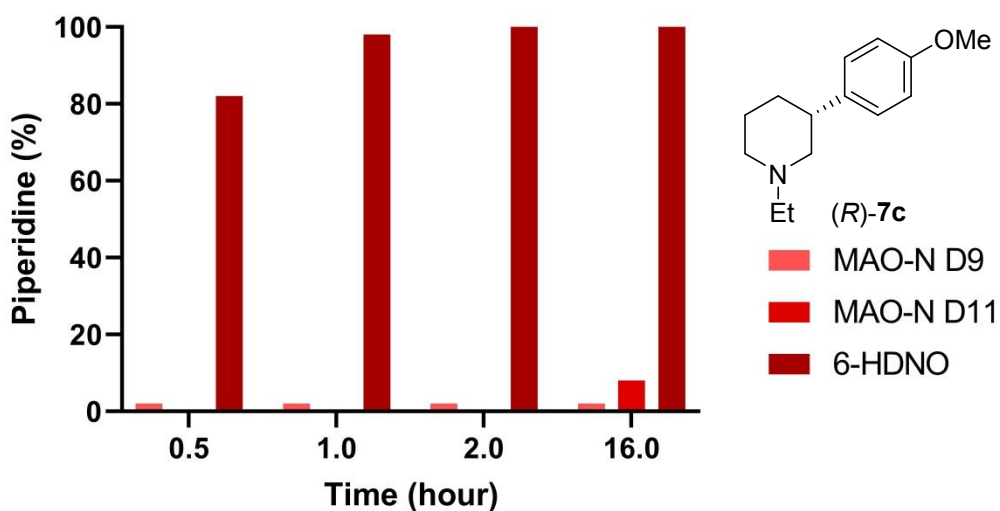

**Figure S3:** Comparison of AmOx variants. Reaction conditions: 10 mM **7b**, purified AmOx (0.5 mg/mL), EnelRED-01 CFE (4 mg/mL), glucose (50 mM), NADP<sup>+</sup> (0.5 mM), GDH-901 (0.1 mg/mL), 100 mM KPi pH 7.0, 30 °C, 200 r.p.m.

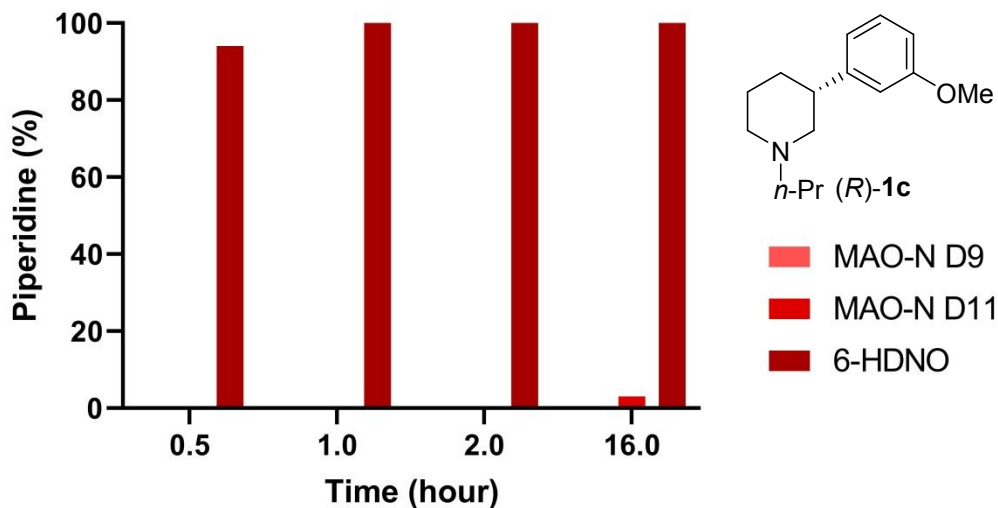

**Figure S4:** Comparison of AmOx variants. Reaction conditions: 10 mM **1b**, purified AmOx (0.5 mg/mL), EnelRED-01 CFE (4 mg/mL), glucose (50 mM), NADP<sup>+</sup> (0.5 mM), GDH-901 (0.1 mg/mL), 100 mM KPi pH 7.0, 30 °C, 200 r.p.m.

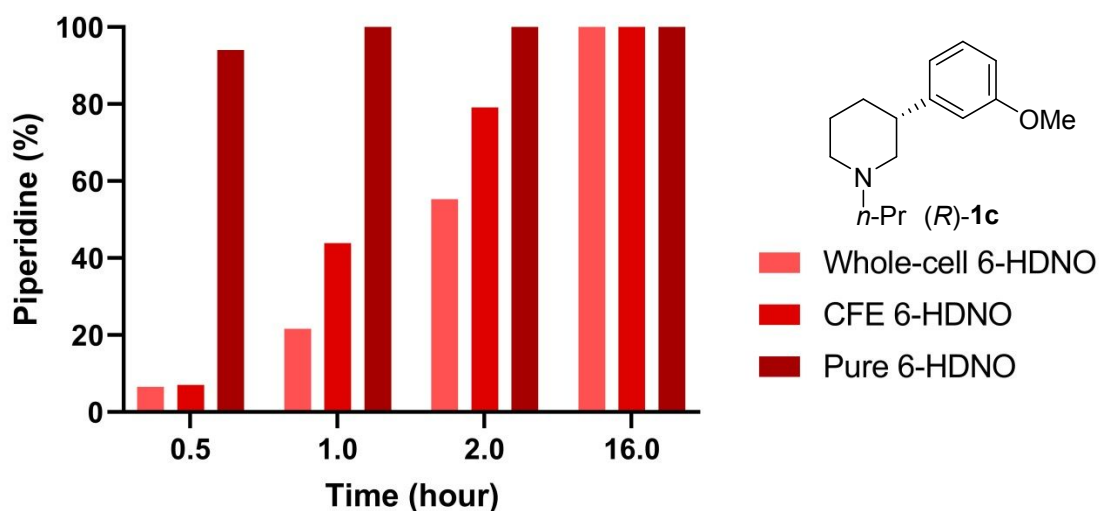

**Figure S5:** Comparison of AmOx variants. Reaction conditions: 10 mM **1b**, Whole-cell 6-HDNO (100 mg/mL) or 6-HDNO CFE (25 mg/mL) or pure 6-HDNO (0.5 mg/mL), EnelRED-01 CFE (4 mg/mL), glucose (50 mM), NADP<sup>+</sup> (0.5 mM), GDH-901 (0.1 mg/mL), 100 mM KPi pH 7.0, 30 °C, 200 r.p.m.

**Table S1:** Preliminary AmOx studies.

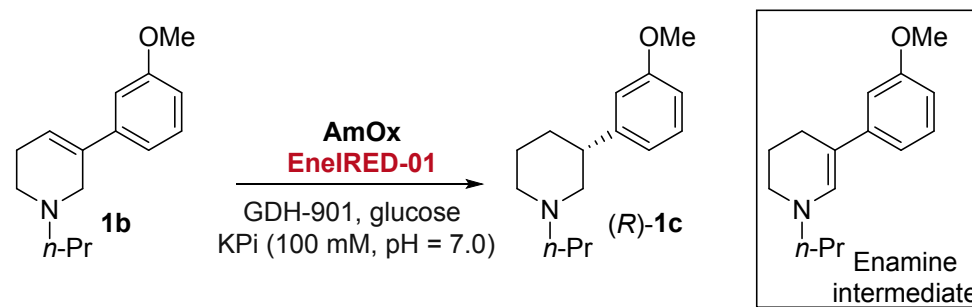

**Entry**                      **AmOx**                      **Yield of 2 (%)<sup>a</sup>**                      **ee (%)**

|   |                    |                 |    |
|---|--------------------|-----------------|----|
| 1 | Purified 6-HDNO    | 79              | 96 |
| 2 | 6-HDNO CFE         | 60              | 96 |
| 3 | Whole-cell 6-HDNO  | 42 <sup>b</sup> | 96 |
| 4 | Purified MAO-N D9  | <1              | —  |
| 5 | Purified MAO-N D11 | <1              | —  |

AmOx enzyme screen. <sup>a</sup>Reaction conditions (preparative scale): Whole-cell AmOx (200 mg/mL) or CFE AmOx (50 mg/mL) or pure AmOx (1 mg/mL), EneIRED-01 CFE (10 mg/mL), 50 mM **1b** (1 mmol), glucose (250 mM), GDH (0.5 mg/mL), NADP<sup>+</sup> (0.5 mM), DMSO (1% v/v), 100 mM KPi pH 7.0, 16 h (<sup>b</sup>24 h), 30 °C, 200 r.p.m.

## 2.2. Screening 384 metagenomic IREDs panel protocol

384-well plate of 50  $\mu$ L reaction mixture contained D-glucose (50 mM), GDH (0.1 mg/mL, Codexis CDX-901), NADP<sup>+</sup> (0.5 mM), IRED CFE (4 mg/mL), purified 6-HDNO (0.5 mg/mL stored in 100 mM KPi pH 7.8) and THP (10 mM, stock conc. = 1 M in DMSO). Each well was made up to 50  $\mu$ L with KPi buffer of reaction volume (100 mM, pH 7.0). The 384-well plate was spun down at 1,000 r.p.m for 1 min, sealed with foil based seal and incubated at 30 °C with shaking at 1,000 r.p.m. for 16 h. The plate was spun down at 1,000 r.p.m. for 1 min and each well quenched with 20  $\mu$ L of 10 M NaOH in pH indicator dye and extracted once with 70  $\mu$ L heptane (to avoid drying over anhydrous MgSO<sub>4</sub> before GC analysis). 384 samples were analysed by GC.

**Table S2:** Selected results from 384 metagenomic IREDs screening.

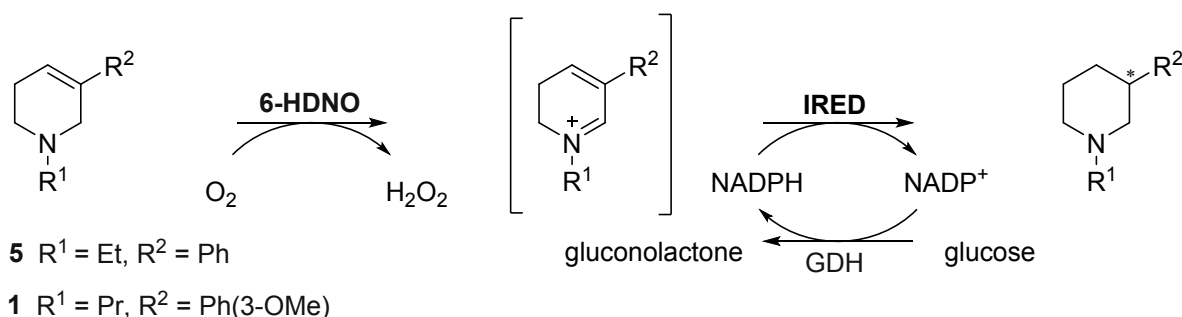

| Entry | IREDs (series A)   | 5b conversion (%) | (R)-5c (ee%) | 1b conversion (%) | (R)-1c (ee%) |
|-------|--------------------|-------------------|--------------|-------------------|--------------|
| 1     | pIR120/EnelRED-01* | >99               | >99          | >99               | 96           |
| 2     | pIR259/EnelRED-02  | >99               | 75           | >99               | >99          |
| 3     | pIR088/EnelRED-03  | >99               | 67           | >99               | 98           |
| 4     | pIR336/EnelRED-04* | >99               | 80           | >99               | 96           |
|       | IREDs (series B)   | 5b conversion (%) | (S)-5c (ee%) | 1b conversion (%) | (S)-1c (ee%) |
| 7     | pIR358/EnelRED-05  | >99               | 59           | >99               | 96           |
| 5     | pIR117/EnelRED-06  | >99               | >99          | >99               | 82           |
| 8     | pIR361/EnelRED-07  | >99               | >99          | >99               | 93           |
| 6     | pIR260/EnelRED-08  | >99               | >99          | >99               | 65           |
| 9     | pIR374/EnelRED-09  | >99               | 59           | >99               | 84           |

Reaction conditions (analytical scale): purified 6-HDNO (0.5 mg/mL), IRED CFE (4 mg/mL), 10 mM substrate, 50 mM glucose, GDH-901 (0.1 mg/mL), 0.5 mM NADP<sup>+</sup>, 16 h. \*The EnelRED-01 and EnelRED-04 have previously been discovered<sup>1</sup>.

### 2.3. Biocatalytic cascade control experiments

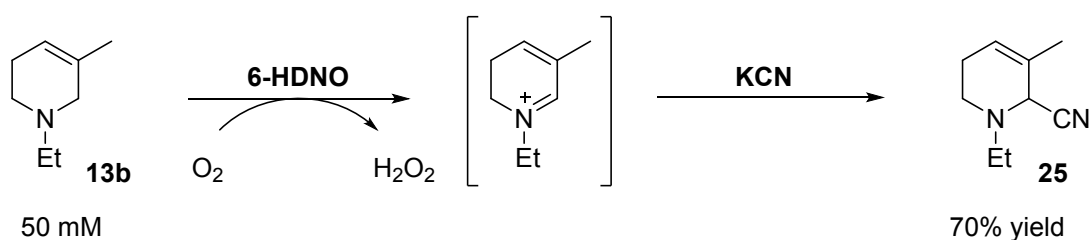

In a 50 mL falcon tube, KCN (326 mg, 5 mmol) and purified 6-HDNO (1 mg/mL) were dissolved in 100 mM KP<sub>i</sub> buffer (20 mL, pH 7.0). 1-ethyl-5-methyl-1,2,3,6-THP (**13b**) (125 mg, 1 mmol, stock conc. = 1 M in DMSO) was added and the reaction shaken at 30 °C, 250 r.p.m. for 16 h. The reaction was basified to pH 12 with 10 M NaOH solution and the product extracted into MTBE (3 x 20 mL) with intermediate centrifugation (4 °C, 4000 r.p.m., 3 min) to improve the separation of phases. The organic layers were combined, dried over anhydrous MgSO<sub>4</sub> and concentrated *in vacuo* to give the

crude product. The crude was purified on a short pad of celite to afford **31** as a colourless oil (105 mg, 70%). **<sup>1</sup>H NMR** (400 MHz, CDCl<sub>3</sub>): δ 5.70 – 5.63 (m, 1H), 3.98 (s, 1H), 2.88 – 2.79 (m, 1H), 2.76 – 2.57 (m, 2H), 2.45 (td, J = 11.4, 4.2 Hz, 1H), 2.38 – 2.23 (m, 1H), 2.10 – 1.99 (m, 1H), 1.86 – 1.80 (m, 3H), 1.16 (t, J = 7.2 Hz, 3H); **<sup>13</sup>C NMR** (100 MHz, CDCl<sub>3</sub>): δ 127.7, 124.7, 116.1, 55.5, 49.5, 45.4, 25.7, 20.5, 12.5; **HRMS** calcd. for C<sub>9</sub>H<sub>15</sub>N<sub>2</sub><sup>+</sup> 151.1230 [M+H]<sup>+</sup>, found 151.1225.

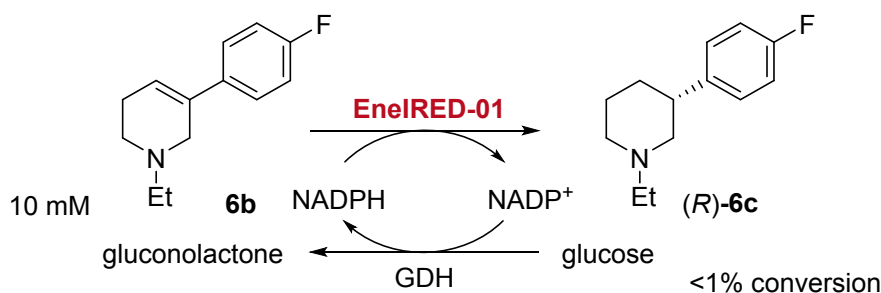

A 500 μL reaction mixture contained D-glucose (50 mM), GDH (0.1 mg/mL, Codexis CDX-901), NADP<sup>+</sup> (0.5 mM), EneIRED-01 CFE (4 mg/mL) and 1-ethyl-5-(4-fluorophenyl)-1,2,3,6-THP (**6b**) (10 mM, 5 μmol, stock conc. = 1 M in DMSO). The reaction volume was made up to 500 μL with KP<sub>i</sub> buffer (100 mM, pH 7.0). Reactions were shaken at 30 °C, 200 r.p.m. and monitored with <sup>19</sup>F NMR over 16 h.

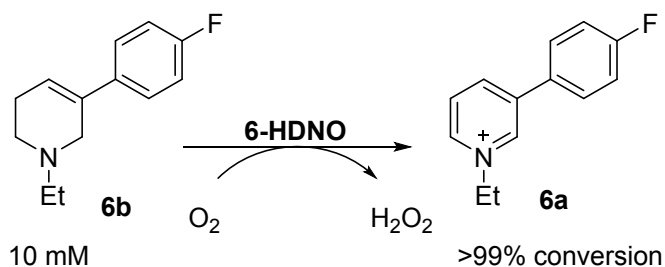

A 500 μL reaction mixture contained D-glucose (50 mM), GDH (0.1 mg/mL, Codexis CDX-901), NADP<sup>+</sup> (0.5 mM), purified 6-HDNO (0.5 mg/mL) and 1-ethyl-5-(4-fluorophenyl)-1,2,3,6-THP (**6b**) (10 mM, 5 μmol, stock conc. = 1 M in DMSO). The reaction volume was made up to 500 μL with KP<sub>i</sub> buffer (100 mM, pH 7.0). Reactions were shaken at 30 °C, 200 r.p.m. and monitored with <sup>19</sup>F NMR over 24 h.

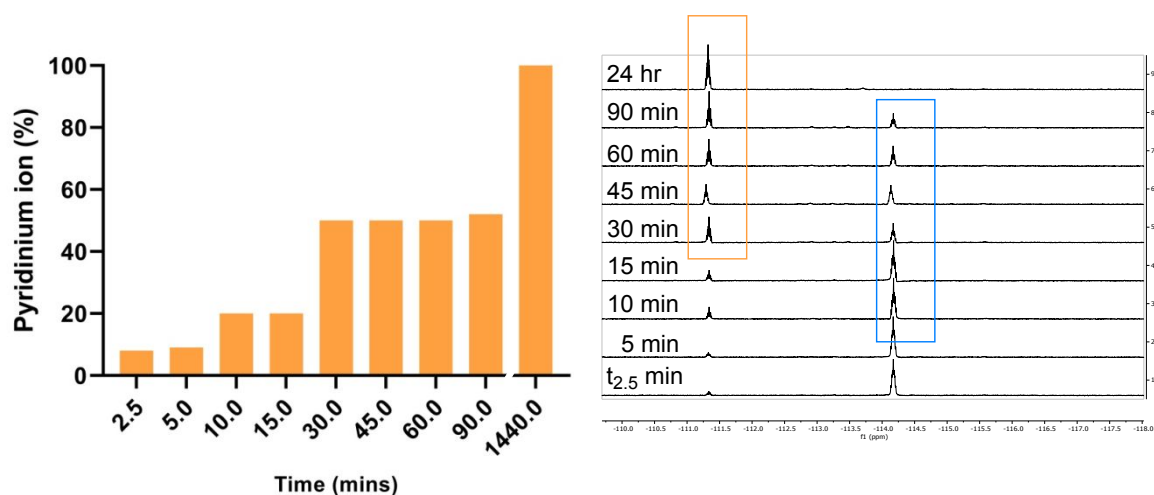

**Figure S6:** Time trial from *in situ* <sup>19</sup>F NMR spectra of the reaction with 6-HDNO only shows the disappearance of THP-**6b** and the formation of pyridinium ion **6a**.

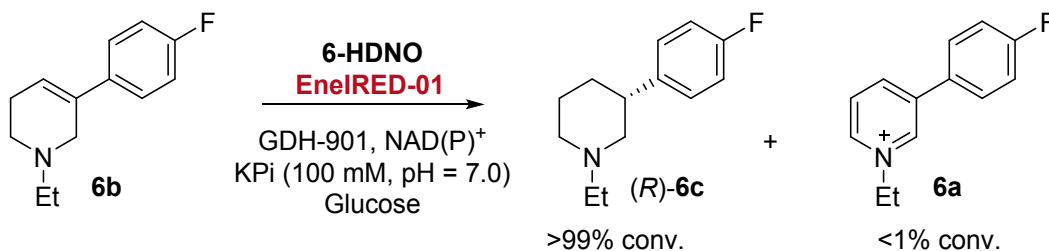

A 500  $\mu$ L reaction mixture contained D-glucose (50 mM), GDH (0.1 mg/mL, Codexis CDX-901), NADP<sup>+</sup> (0.5 mM), EneIRED-01 CFE (4 mg/mL), purified 6-HDNO (0.5 mg/mL) and 1-ethyl-5-(4-fluorophenyl)-1,2,3,6-THP (**6b**) (10 mM, 5  $\mu$ mol, stock conc. = 1 M in DMSO). The reaction volume was made up to 500  $\mu$ L with KPi buffer (100 mM, pH 7.0). Reactions were shaken at 30  $^{\circ}$ C, 200 r.p.m. and monitored with <sup>19</sup>F NMR over 16 h.



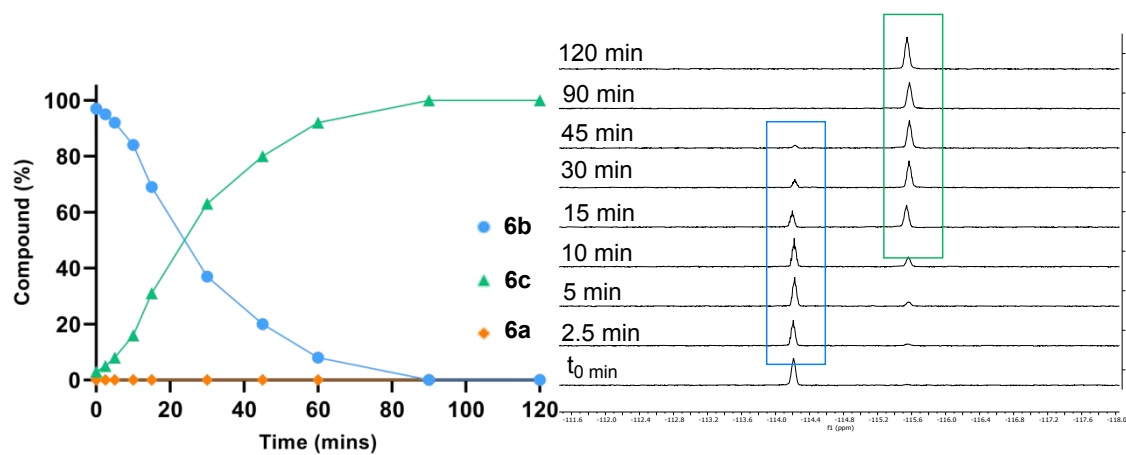

**Figure S7:** Kinetic profile from *in situ*  $^{19}\text{F}$  NMR spectra of the cascade reaction with 6-HDNO and EneIRED-01 shows the disappearance of THP-**6b** and the formation of piperidine (*R*)-**6c**.

### 3. General procedure for biotransformations

A 500  $\mu$ L reaction mixture contained D-glucose (50 mM), GDH (0.1 mg/mL, Codexis CDX-901), NADP<sup>+</sup> (0.5 mM), EneIRED CFE (4 mg/mL), purified 6-HDNO (0.5 mg/mL stored in 100 mM KPi pH 7.8) and THP (10 mM, stock conc. = 1 M in DMSO). The reaction volume was made up to 500  $\mu$ L with KPi buffer (100 mM, pH 7.0). Reactions were incubated at 30 °C with shaking at 200 r.p.m. for 0-16 h, after which they were quenched by the addition of 40  $\mu$ L of 10 M NaOH and extracted once with 500  $\mu$ L MTBE, dried over anhydrous MgSO<sub>4</sub> and analysed on GCMS followed by chiral HPLC or GC.

**Table S3:** Substrate scope of the 6-HDNO-EneIRED cascade (full table of Manuscript **Fig. 2**).

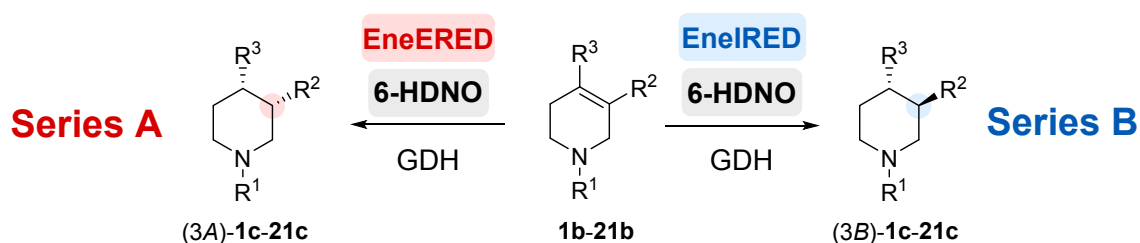

| Piperidine | Series A (EneIRED) |           |                  |    | Series B (EneIRED) |           |                  |    |
|------------|--------------------|-----------|------------------|----|--------------------|-----------|------------------|----|
|            | Conversion (%)     | Yield (%) | ee (%)           | dr | Conversion (%)     | Yield (%) | ee (%)           | dr |
| <b>1c</b>  | >99                | 79        | 96               | -  | >99                | 87        | 96 <sup>b</sup>  | -  |
| <b>2c</b>  | >99                | 89        | >99 <sup>a</sup> | -  | >99                | 60        | 92 <sup>c</sup>  | -  |
| <b>3c</b>  | >99                | 81        | 99               | -  | >99                | 76        | 99 <sup>d</sup>  | -  |
| <b>4c</b>  | >99                | 83        | >99              | -  | >99                | 72        | 93 <sup>d</sup>  | -  |
| <b>5c</b>  | >99                | 86        | 86               | -  | >99                | n.d.      | 89 <sup>d</sup>  | -  |
| <b>6c</b>  | >99                | 81        | 99               | -  | >99                | n.d.      | >99 <sup>d</sup> | -  |
| <b>7c</b>  | >99                | 78        | >99              | -  | >99                | n.d.      | 99 <sup>d</sup>  | -  |
| <b>8c</b>  | 88                 | 62        | >99              | -  | >99                | n.d.      | 98 <sup>c</sup>  | -  |
| <b>9c</b>  | >99                | 85        | 86               | -  | >99                | n.d.      | >99 <sup>c</sup> | -  |
| <b>10c</b> | >99                | 73        | 94               | -  | >99                | n.d.      | 98 <sup>d</sup>  | -  |
| <b>11c</b> | >99                | 64        | 90               | -  | >99                | n.d.      | 83 <sup>d</sup>  | -  |
| <b>12c</b> | >99                | 77        | >99              | -  | n.d.               | -         | -                | -  |
| <b>13c</b> | >99                | 42        | n.d.             | -  | n.d.               | -         | -                | -  |

|            |     |      |      |                       |      |      |                 |                                    |
|------------|-----|------|------|-----------------------|------|------|-----------------|------------------------------------|
| <b>14c</b> | 49  | n.d. | n.d. | -                     | n.d. | -    | -               | -                                  |
| <b>15c</b> | >99 | 34   | -    | -                     | >99  | n.d. | -               | -                                  |
| <b>16c</b> | >99 | 62   | -    | -                     | >99  | n.d. | -               | -                                  |
| <b>17c</b> | >99 | 54   | 89   | <i>trans</i><br>69:31 | >99  | n.d. | 98 <sup>c</sup> | <i>cis</i><br>60:40                |
| <b>18c</b> | >99 | 68   | >99  | <i>cis</i><br>90:10   | >99  | n.d. | 98 <sup>e</sup> | <i>trans</i><br>89:11              |
| <b>19c</b> | >99 | 87   | n.d. | <i>cis</i><br>98:2    | >99  | n.d. | n.d.            | <i>trans</i><br>97:3 <sup>f</sup>  |
| <b>20c</b> | >99 | 89   | n.d. | <i>cis</i><br>96:4    | 96   | n.d. | n.d.            | <i>trans</i><br>86:14 <sup>d</sup> |
| <b>21c</b> | 93  | n.d. | n.d. | 97:3 <sup>a</sup>     | >99  | n.d. | n.d.            | 92:8 <sup>c</sup>                  |

Reaction conditions (preparative scale): purified 6-HDNO (1 mg/mL), EnIRED CFE (10 mg/mL), THP (1 mmol), glucose (5 mmol), GDH CDX-901 (0.5 mg/mL), NADP<sup>+</sup> (0.5 mmol), DMSO (1% v/v), 100 mM KPi pH 7.0, 16-24 h, 30 °C, 200 r.p.m. (analytical conditions): purified 6-HDNO (0.5 mg/mL), EnIRED CFE (4 mg/mL), 10 mM THP (5 μmol), 50 mM glucose (25 μmol), GDH CDX-901 (0.1 mg/mL), 0.5 mM NADP<sup>+</sup> (0.05 μM), 2-16 h). All examples use EnIRED-01 except; <sup>a</sup>EnIRED-02, <sup>b</sup>EnIRED-05, <sup>c</sup>EnIRED-06, <sup>d</sup>EnIRED-07, <sup>e</sup>EnIRED-08 and <sup>f</sup>EnIRED-09. n.d. = not determined.

#### 4. Absolute Configuration Determination

Enantiomeric excess (ee) was determined chiral HPLC, SFC and GC methods.

##### 4.1. Commercial optically pure products: Analysis

Absolute configurations of **1c** (demethylated product) and **2c** were determined by comparing the HPLC traces of commercial optically pure (*R*)-(+)-3-(3-Hydroxyphenyl)-*N*-propylpiperidine and (*S*)-(-)-(3-methanesulfonyl-phenyl)-1-propyl-piperidine hydrochloride respectively.

Absolute configurations of **5c** and **11c** were determined by comparing the SFC traces of *N*-alkylated commercial optically pure (*S*)-3-phenylpiperidine with iodoethane and iodomethane respectively. Please see **section 13.2** for more details.

##### 4.2. Literature comparison: Analysis

Absolute configuration of **3c** was determined by comparing the optical rotation data of previous studies<sup>2</sup>. The product of the biotransformation was deallylated and Boc protected to yield *tert*-butyl (*R/S*)-3-(4-bromophenyl)piperidine-1-carboxylate (**23**) product for direct comparison.

Absolute configuration of **4c** was determined by comparing the spectroscopic data of previous studies<sup>3</sup>. The product of the biotransformation were deallylated to yield (*R/S*)-4-(piperidin-3-yl)aniline (**27**) product for direct comparison.

##### 4.3. VCD: Analysis

Absolute configurations of **6c-10c** were determined by the vibrational circular dichroism methodology (VCD, BioTools, Jupiter, FL). Please see **section 12** for more details.

## 5. Preparative-Scale Procedure and Product Characterisation

### 5.1. General Method 1: preparative-scale procedure

In a 50 mL falcon tube, glucose (900 mg, 5.00 mmol), NADP<sup>+</sup> (6 mg, 0.01 mmol), GDH (0.5 mg/mL, CDX-901) EneIRED CFE (10 mg/mL) and purified 6-HDNO (1 mg/mL) were dissolved in 100 mM KP<sub>i</sub> buffer (20 mL, pH 7.0). THP (1.00 mmol, stock conc. = 1 M in DMSO) was added and the reaction shaken at 30 °C, 250 r.p.m. for 16 h. The reaction was basified to pH 12 with 10 M NaOH solution and the product extracted into MTBE (3 x 20 mL) with intermediate centrifugation (4 °C, 4000 r.p.m., 3 min) to improve the separation of phases. The organic layers were combined, dried over anhydrous MgSO<sub>4</sub> and concentrated *in vacuo* to give the crude product. The crude was purified on a short pad of celite to afford the corresponding compound.

#### (*R*)-3-(3-methoxyphenyl)-1-propylpiperidine (**1c**)

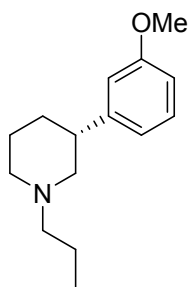

Following General Method 1 with 5-(3-methoxyphenyl)-1-propyl-1,2,3,6-THP (**1b**) (231 mg, 1.00 mmol) and shaking at 30 °C, 250 r.p.m. for 16 h to afford the title compound as a colourless oil (184 mg, 79%).

**Enantioselectivity:** EneIRED-01, 96% ee

**<sup>1</sup>H NMR** (400 MHz, CDCl<sub>3</sub>): δ 7.21 (t, *J* = 7.8 Hz, 1H), 6.83 (d, *J* = 7.8 Hz, 1H), 6.81 – 6.78 (m, 1H), 6.78 – 6.71 (m, 1H), 3.80 (s, 3H), 3.06 – 2.93 (m, 2H), 2.81 (tt, *J* = 11.7, 3.6 Hz, 1H), 2.36 – 2.25 (m, 2H), 2.00 – 1.86 (m, 3H), 1.84 – 1.63 (m, 2H), 1.58 – 1.37 (m, 3H), 0.89 (t, *J* = 7.4 Hz, 3H); **<sup>13</sup>C NMR** (100 MHz, CDCl<sub>3</sub>): δ 159.7, 146.7, 129.4, 119.8, 113.4, 111.4, 61.5, 61.4, 55.3, 54.1, 43.2, 31.8, 25.9, 20.2, 12.2; **HRMS** calcd. for C<sub>15</sub>H<sub>24</sub>NO<sup>+</sup> 243.1852 [M+H]<sup>+</sup>, found 234.1841.

#### (*R*)-3-(1-propylpiperidin-3-yl)phenol (**22**)

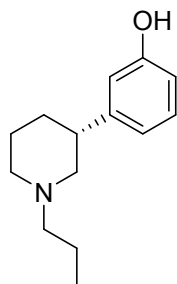

(*R*)-3-(3-methoxyphenyl)-1-propylpiperidine (**1c**) (150 mg, 0.64 mmol) was stirred in aqueous HBr (48% in H<sub>2</sub>O, 4.4 mL, 39.19 mmol) at 100 °C for 1 h. The reaction mixture was cooled over ice and basified to pH 12 by addition of 5 M NaOH. The product was extracted into DCM (3 x 5 mL). The organic phase was dried over anhydrous MgSO<sub>4</sub> and concentrated *in vacuo* to afford the title compound as a colourless oil (126 mg, 89%).

**<sup>1</sup>H NMR** (400 MHz, CDCl<sub>3</sub>): δ 7.18 (t, *J* = 7.8 Hz, 1H), 6.82 – 6.67 (m, 3H), 3.25 – 3.17 (m, 1H), 3.06 (d, *J* = 11.5 Hz, 1H), 2.93 (tt, *J* = 11.8, 3.6 Hz, 1H), 2.47 – 2.25 (m, 2H), 2.05 – 1.93 (m, 3H), 1.88 – 1.68 (m, 2H), 1.62 – 1.44 (m, 3H), 0.88 (t, *J* = 7.3 Hz, 3H); **<sup>13</sup>C NMR** (100 MHz, CDCl<sub>3</sub>): δ 156.7, 145.8, 129.93, 117.9, 114.7, 114.2, 61.6, 61.3, 54.2, 42.1, 30.1, 25.5, 19.5, 12.2; **HRMS** calcd. for C<sub>14</sub>H<sub>22</sub>NO<sup>+</sup> 220.1696 [M+H]<sup>+</sup>, found 220.1696.

**(*S*)-3-(3-methoxyphenyl)-1-propylpiperidine (1c)**

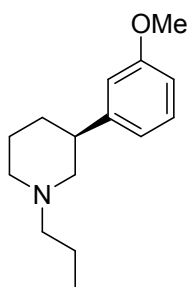

Following General Method 1 with 5-(3-methoxyphenyl)-1-propyl-1,2,3,6-THP (**1b**) (231 mg, 1.00 mmol) and shaking at 30 °C, 250 r.p.m. for 16 h to afford the title compound as a colourless oil (203 mg, 87%).

**Enantioselectivity:** EnelRED-05, 96% ee

**<sup>1</sup>H NMR** (400 MHz, CDCl<sub>3</sub>): δ 7.21 (t, *J* = 7.9 Hz, 1H), 6.87 – 6.71 (m, 3H), 3.80 (s, 3H), 3.06 – 2.93 (m, 2H), 2.81 (tt, *J* = 11.7, 3.6 Hz, 1H), 2.36 – 2.25 (m, 2H), 2.00 – 1.86 (m, 3H), 1.84 – 1.63 (m, 2H),

1.60 – 1.48 (m, 2H), 1.48 – 1.36 (m, 1H), 0.89 (t,  $J = 7.4$  Hz, 3H);  $^{13}\text{C NMR}$  (100 MHz,  $\text{CDCl}_3$ ):  $\delta$  159.7, 146.7, 129.4, 119.7, 113.4, 111.4, 61.5, 61.4, 55.3, 54.1, 43.2, 31.8, 25.9, 20.2, 12.2; **HRMS** calcd. for  $\text{C}_{15}\text{H}_{24}\text{NO}^+$  234.1852  $[\text{M}+\text{H}]^+$ , found 234.1857.

**(-)-preclamol (22)**

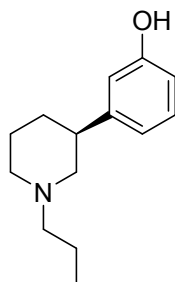

(S)-3-(3-methoxyphenyl)-1-propylpiperidine (**1c**) (190 mg, 0.81 mmol) was stirred in aqueous HBr (48% in  $\text{H}_2\text{O}$ , 5.6 mL, 49.60 mmol) at 100 °C for 1 h. The reaction mixture was cooled over ice and basified to pH 12 by addition of 5 M NaOH. The product was extracted into DCM (3 x 5 mL). The organic phase was dried over anhydrous  $\text{MgSO}_4$  and concentrated *in vacuo* to afford the title compound as a colourless oil (164 mg, 92%).

$^1\text{H NMR}$  (400 MHz,  $\text{CDCl}_3$ ):  $\delta$  7.18 (t,  $J = 7.8$  Hz, 1H), 6.81 – 6.67 (m, 3H), 3.27 – 3.19 (m, 1H), 3.09 (d,  $J = 11.0$  Hz, 1H), 2.93 (tt,  $J = 11.8, 3.5$  Hz, 1H), 2.48 – 2.27 (m, 2H), 2.07 – 1.92 (m, 3H), 1.86 – 1.71 (m, 2H), 1.64 – 1.43 (m, 3H), 0.87 (t,  $J = 7.4$  Hz, 3H);  $^{13}\text{C NMR}$  (100 MHz,  $\text{CDCl}_3$ ):  $\delta$  157.1, 145.5, 129.9, 117.5, 114.8, 114.4, 61.5, 61.3, 54.1, 41.9, 30.0, 25.3, 19.3, 12.2; **HRMS** calcd. for  $\text{C}_{14}\text{H}_{22}\text{NO}^+$  220.1696  $[\text{M}+\text{H}]^+$ , found 220.1698.

**(R)-3-(3-(methylsulfonyl)phenyl)-1-propylpiperidine (2c)**

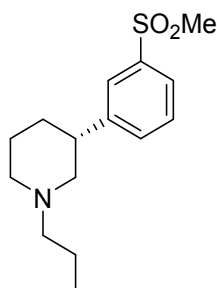

Following General Method 1 with 5-(3-(methylsulfonyl)phenyl)-1-propyl-1,2,3,6-THP (**2b**) (279 mg, 1.00 mmol) and shaking at 30 °C, 250 r.p.m. for 16 h to afford the title compound as a colourless oil (250 mg, 89%).

**Enantioselectivity:** EnelRED-02, >99% ee

**<sup>1</sup>H NMR** (400 MHz, CDCl<sub>3</sub>): δ 7.82 – 7.73 (m, 2H), 7.54 – 7.44 (m, 2H), 3.04 (s, 3H), 3.02 – 2.84 (m, 3H), 2.36 – 2.26 (m, 2H), 2.05 – 1.88 (m, 3H), 1.83 – 1.75 (m, 1H), 1.75 – 1.63 (m, 1H), 1.57 – 1.37 (m, 3H), 0.88 (t, *J* = 7.4 Hz, 3H); **<sup>13</sup>C NMR** (100 MHz, CDCl<sub>3</sub>): δ 146.9, 140.7, 133.0, 129.5, 125.9, 125.4, 61.2, 60.9, 53.8, 44.6, 42.9, 31.7, 25.6, 20.1, 12.1; **HRMS** calcd. for C<sub>15</sub>H<sub>24</sub>NO<sub>2</sub>S<sup>+</sup> 282.1522 [M+H]<sup>+</sup>, found 282.1530.

**(-)-OSU6162 (2c)**

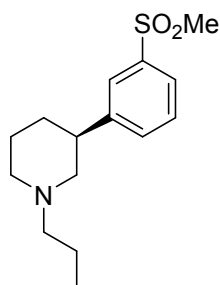

Following General Method 1 with 5-(3-(methylsulfonyl)phenyl)-1-propyl-1,2,3,6-THP (**2b**) (279 mg, 1.00 mmol) and shaking at 30 °C, 250 r.p.m. for 16 h to afford the title compound as a colourless oil (169 mg, 60%).

**Enantioselectivity:** EnelRED-06, 92% ee

**<sup>1</sup>H NMR** (400 MHz, CDCl<sub>3</sub>): δ 7.82 – 7.73 (m, 2H), 7.54 – 7.44 (m, 2H), 3.04 (s, 3H), 3.02 – 2.84 (m, 3H), 2.36 – 2.26 (m, 2H), 2.05 – 1.88 (m, 3H), 1.83 – 1.75 (m, 1H), 1.75 – 1.63 (m, 1H), 1.57 – 1.37 (m, 3H), 0.88 (t, *J* = 7.4 Hz, 3H); **<sup>13</sup>C NMR** (100 MHz, CDCl<sub>3</sub>): δ 146.9, 140.7, 133.0, 129.5, 125.9, 125.4, 61.2, 60.9, 53.8, 44.6, 42.9, 31.7, 25.6, 20.1, 12.1; **HRMS** calcd. for C<sub>15</sub>H<sub>24</sub>NO<sub>2</sub>S<sup>+</sup> 282.1522 [M+H]<sup>+</sup>, found 282.1530.

**(R)-1-allyl-3-(4-bromophenyl)piperidine (3c)**



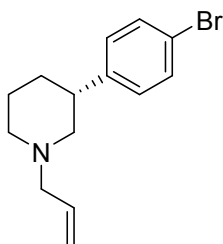

Following General Method 1 with 1-allyl-5-(4-bromophenyl)-1,2,3,6-THP (**3b**) (278 mg, 1.00 mmol) and shaking at 30 °C, 250 r.p.m. for 24 h to afford the title compound as a yellow oil (227 mg, 81%).

**Enantioselectivity:** EnelRED-01, 99% ee

**<sup>1</sup>H NMR** (400 MHz, CDCl<sub>3</sub>): δ 7.44 – 7.36 (m, 2H), 7.14 – 7.06 (m, 2H), 5.88 (ddt, *J* = 16.8, 10.1, 6.6 Hz, 1H), 5.20 – 5.10 (m, 2H), 3.04 – 2.93 (m, 4H), 2.79 (tt, *J* = 11.5, 3.6 Hz, 1H), 1.99 – 1.84 (m, 3H), 1.83 – 1.64 (m, 2H), 1.40 (qd, *J* = 12.4, 4.4 Hz, 1H); **<sup>13</sup>C NMR** (100 MHz, CDCl<sub>3</sub>): δ 143.8, 135.3, 131.5, 129.1, 120.1, 118.0, 62.3, 61.0, 53.8, 42.6, 31.6, 25.8; **HRMS** calcd. for C<sub>14</sub>H<sub>19</sub>BrN<sup>+</sup> 280.0695 [M+H]<sup>+</sup>, found 280.0697.

#### (*R*)-3-(4-bromophenyl)piperidine (**26**)

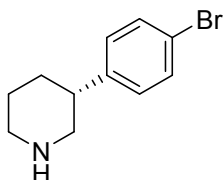

Under nitrogen, RhCl(PPh<sub>3</sub>)<sub>3</sub> (33 mg, 0.04 mmol) was added to a solution of (*R*)-1-allyl-3-(4-bromophenyl)piperidine (**3c**) (200 mg, 0.71 mmol) in MeCN:H<sub>2</sub>O (84:16, w/w, 18 mL). The reaction mixture was stirred at 100 °C for 16 h, cooled to room temperature and diluted with DCM. The organic layer was washed with NaHCO<sub>3</sub> (2 × 20 mL), dried over anhydrous MgSO<sub>4</sub> and concentrated *in vacuo* to yield crude product which was carried forward without further purification (160 mg, 94%). **<sup>1</sup>H NMR** (400 MHz, CDCl<sub>3</sub>): δ 7.45 – 7.37 (m, 2H), 7.12 – 7.05 (m, 2H), 3.12 (t, *J* = 11.7 Hz, 2H), 2.70 – 2.55 (m, 3H), 1.97 (d, *J* = 9.2 Hz, 1H), 1.85 – 1.81 (m, 2H), 1.66 – 1.51 (m, 2H); **<sup>13</sup>C NMR** (100 MHz, CDCl<sub>3</sub>): δ 144.0, 131.6, 129.0, 120.0, 54.0, 46.7, 43.9, 29.8, 27.1.

#### *tert*-butyl (*R*)-3-(4-bromophenyl)piperidine-1-carboxylate (**23**)

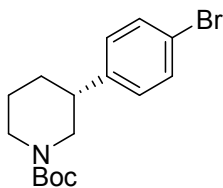

1 M NaOH (0.80 mL, 0.80 mmol) was added to a mixture of (*R*)-3-(4-bromophenyl)piperidine (**26**) (160 mg 0.67 mmol) in MTBE (5 mL) at room temperature. After 5 min Boc anhydride (146 mg, 0.67 mmol) was slowly added to the reaction mixture which was stirred at room temperature until **26** was consumed (monitored by GC-MS). The organic layer was washed with water (2 × 10 mL), dried over anhydrous MgSO<sub>4</sub> and concentrated *in vacuo* to yield the crude product. The crude product was subjected to flash column chromatography on silica (gradient elution from 20:1 to 10:1 hexane:MTBE) to afford the title compound as a colourless oil (214 mg, 94%). [ $\alpha$ ]<sub>D</sub><sup>25</sup> = +30 (c = 0.04, CHCl<sub>3</sub>); **<sup>1</sup>H NMR** (500 MHz, CDCl<sub>3</sub>, 273 K):  $\delta$  7.42 (dd, *J* = 14.1, 8.0 Hz, 2H), 7.10 (d, *J* = 8.2 Hz, 2H), 4.21 (dd, *J* = 24.4, 12.1 Hz, 1H), 4.07 (t, *J* = 13.2 Hz, 1H), 2.79 – 2.56 (m, 3H), 2.00 – 1.94 (m, 1H), 1.79 – 1.71 (m, 1H), 1.60 – 1.52 (m, 2H), 1.45 (d, *J* = 11.1 Hz, 9H); **<sup>13</sup>C NMR** (100 MHz, CDCl<sub>3</sub>):  $\delta$  154.9, 142.6, 131.7, 129.0, 120.4, 79.7, 42.1, 31.8, 28.6, 25.5; **HRMS** calcd. for C<sub>16</sub>H<sub>23</sub>BrNO<sub>2</sub><sup>+</sup> 340.0907 [M+H]<sup>+</sup>, found 340.0916.

**(S)-1-allyl-3-(4-bromophenyl)piperidine (3c)**

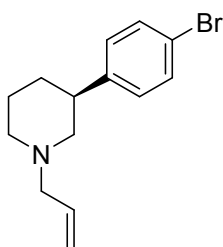

Following General Method 1 with 1-allyl-5-(4-bromophenyl)-1,2,3,6-THP (**3b**) (278 mg, 1.00 mmol) and shaking at 30 °C, 250 r.p.m. for 24 h to afford the title compound as a yellow oil (213 mg, 76%).

**Enantioselectivity:** EnIRED-07, 99% ee

**<sup>1</sup>H NMR** (400 MHz, CDCl<sub>3</sub>):  $\delta$  7.43 – 7.39 (m, 2H), 7.14 – 7.06 (m, 2H), 5.91 (ddt, *J* = 16.9, 10.1, 6.7 Hz, 1H), 5.25 – 5.14 (m, 2H), 3.16 – 2.76 (m, 5H), 2.04 – 1.89 (m, 3H), 1.82 – 1.77 (m, 2H), 1.50 –

1.35 (m, 1H);  $^{13}\text{C}$  NMR (100 MHz,  $\text{CDCl}_3$ ):  $\delta$  143.8, 135.3, 131.5, 129.1, 120.1, 118.0, 62.3, 61.0, 53.8, 42.6, 31.6, 25.8; HRMS calcd. for  $\text{C}_{14}\text{H}_{19}\text{BrN}^+$  280.0695  $[\text{M}+\text{H}]^+$ , found 280.0689.

**(S)-3-(4-bromophenyl)piperidine (26)**

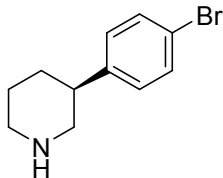

Under nitrogen,  $\text{RhCl}(\text{PPh}_3)_3$  (33 mg, 0.04 mmol) was added to a solution of (S)-1-allyl-3-(4-bromophenyl)piperidine (**3c**) (213 mg, 0.76 mmol) in  $\text{MeCN}:\text{H}_2\text{O}$  (84:16, w/w, 18 mL). The reaction mixture was stirred at 100 °C for 16 h, cooled to room temperature and diluted with DCM. The organic layer was washed with  $\text{NaHCO}_3$  (2  $\times$  20 mL), dried over anhydrous  $\text{MgSO}_4$  and concentrated *in vacuo* to yield crude product which was carried forward without further purification (179 mg, 98%).  $^1\text{H}$  NMR (400 MHz,  $\text{CDCl}_3$ ):  $\delta$  7.44 – 7.38 (m, 2H), 7.12 – 7.05 (m, 2H), 3.15 (t,  $J$  = 11.8 Hz, 2H), 2.73 – 2.58 (m, 3H), 2.09 – 2.06 (m, 1H), 1.87 – 1.83 (m, 2H), 1.62 – 1.57 (m, 2H);  $^{13}\text{C}$  NMR (100 MHz,  $\text{CDCl}_3$ ):  $\delta$  144.0, 131.6, 129.0, 120.0, 54.0, 46.7, 43.9, 29.8, 27.1.

**tert-butyl (S)-3-(4-bromophenyl)piperidine-1-carboxylate (23)**

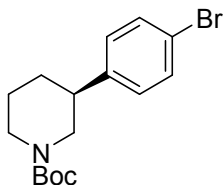

1 M NaOH (0.84 mL, 0.84 mmol) was added to a mixture of (S)-3-(4-bromophenyl)piperidine (**26**) (167 mg, 0.70 mmol) in MTBE (5 mL) at room temperature. After 5 min Boc anhydride (153 mg, 0.70 mmol) was slowly added to the reaction mixture which was stirred at room temperature until **26** was consumed (monitored by GC-MS). The organic layer was washed with water (2  $\times$  10 mL), dried over anhydrous  $\text{MgSO}_4$  and concentrated *in vacuo* to yield the crude product. The crude product was subjected to flash column chromatography on silica (gradient elution from 20:1 to 10:1 hexane:MTBE) to afford the title compound as a colourless oil (155 mg, 65%).  $[\alpha]^{25}_{\text{D}}$  -39.4 ( $c$  = 0.03,  $\text{CHCl}_3$ ), lit.<sup>2</sup>  $[\alpha]^{25}_{\text{D}}$  = -62.4 ( $c$  = 0.37,  $\text{CHCl}_3$ );  $^1\text{H}$  NMR (500 MHz,  $\text{CDCl}_3$ , 273 K):  $\delta$  7.42 (dd,  $J$  = 15.4, 8.0 Hz, 2H), 7.10 (dd,  $J$  = 8.4, 3.2 Hz, 2H), 4.21 (dd,  $J$  = 21.6, 12.1 Hz, 1H), 4.11 – 4.02 (m, 1H), 2.78 – 2.71 (m, 1H),

2.71 – 2.55 (m, 2H), 1.99 – 1.94 (m, 1H), 1.80 – 1.69 (m, 1H), 1.62 – 1.49 (m, 2H), 1.44 (d,  $J = 12.6$  Hz, 9H);  $^{13}\text{C NMR}$  (100 MHz,  $\text{CDCl}_3$ ):  $\delta$  154.9, 142.6, 131.7, 129.0, 120.4, 79.7, 42.1, 31.8, 29.8, 28.6, 25.5; **HRMS** calcd. for  $\text{C}_{16}\text{H}_{23}\text{BrNO}_2^+$  340.0907  $[\text{M}+\text{H}]^+$ , found 340.0911.

**(R)-4-(1-allylpiperidin-3-yl)aniline (4c)**

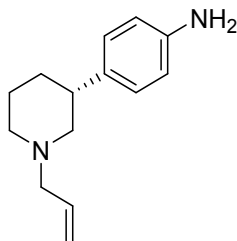

Following General Method 1 with 4-(1-allyl-1,2,5,6-tetrahydropyridin-3-yl)aniline (**4b**) (214 mg, 1.00 mmol) and shaking at 30 °C, 250 r.p.m. for 24 h to afford the title compound as an orange oil (180 mg, 83%).

**Enantioselectivity:** EnelRED-01, >99% ee

$^1\text{H NMR}$  (400 MHz,  $\text{CDCl}_3$ ):  $\delta$  7.05 – 6.97 (m, 2H), 6.66 – 6.58 (m, 2H), 5.89 (ddt,  $J = 16.8, 10.1, 6.6$  Hz, 1H), 5.19 – 5.07 (m, 2H), 3.54 (s, 1H), 3.05 – 2.92 (m, 4H), 2.71 (tt,  $J = 11.8, 3.7$  Hz, 1H), 1.97 – 1.83 (m, 3H), 1.81 – 1.62 (m, 2H), 1.38 (qd,  $J = 12.4, 4.3$  Hz, 1H);  $^{13}\text{C NMR}$  (100 MHz,  $\text{CDCl}_3$ ):  $\delta$  144.78, 135.41, 135.00, 128.04, 117.83, 115.24, 62.39, 61.65, 53.87, 42.16, 31.73, 25.93; **HRMS** calcd. for  $\text{C}_{14}\text{H}_{21}\text{N}_2^+$  217.1699  $[\text{M}+\text{H}]^+$ , found 217.1691.

**(R)-4-(piperidin-3-yl)aniline (27)**

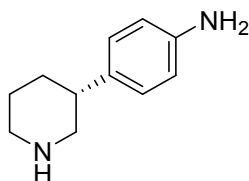

Under nitrogen,  $\text{RhCl}(\text{PPh}_3)_3$  (33 mg, 0.04 mmol) was added to a solution of (R)-4-(1-allylpiperidin-3-yl)aniline (**4c**) (151 mg, 0.70 mmol) in  $\text{MeCN}:\text{H}_2\text{O}$  (84:16, w/w, 18 mL). The reaction mixture was stirred at 100 °C for 16 h, cooled to room temperature and diluted with DCM. The organic layer was washed with  $\text{NaHCO}_3$  (2 × 20 mL), dried over anhydrous  $\text{MgSO}_4$  and concentrated *in vacuo* to yield crude product which was carried forward without further purification (39 mg, 32%).  $^1\text{H NMR}$  (400 MHz,

CDCl<sub>3</sub>):  $\delta$  7.00 – 6.92 (m, 2H), 6.66 – 6.58 (m, 2H), 3.34 – 3.23 (m, 2H), 2.88 – 2.65 (m, 3H), 2.05 – 1.95 (m, 1H), 1.94 – 1.87 (m, 1H), 1.87 – 1.74 (m, 1H), 1.66 – 1.50 (m, 1H); <sup>13</sup>C NMR (100 MHz, CDCl<sub>3</sub>):  $\delta$  143.4, 130.3, 125.9, 113.4, 49.4, 42.9, 38.6, 29.1, 22.4; **GCMS** calcd. for C<sub>11</sub>H<sub>16</sub>N<sub>2</sub> 176.1313 [M], found 176,1300.

**tert-butyl (R)-3-(4-aminophenyl)piperidine-1-carboxylate (24)**

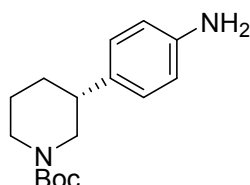

To a mixture of (*R*)-4-(piperidin-3-yl)aniline (**33**) (39 mg 0.22 mmol) in DCM (5 mL) at 0 °C, Boc anhydride (48 mg, 0.22 mmol) was added and stirred at 0 °C until **33** was consumed (monitored by GC-MS). Then a solution of 7 N NH<sub>3</sub> in MeOH (1 mL) was added and the mixture was stirred for 30 min at 0 °C. After dilution with DCM, the organic layer was washed with NaHCO<sub>3</sub> (2 × 10 mL), dried over anhydrous MgSO<sub>4</sub> and concentrated *in vacuo* to yield the crude product. The crude product was subjected to flash column chromatography on silica (gradient elution from 20:1 to 10:1 hexane:MTBE) to afford the title compound as a white solid (52 mg, 86%). <sup>1</sup>H NMR (500 MHz, CDCl<sub>3</sub>, 273 K):  $\delta$  7.05 – 6.99 (m, 2H), 6.69 – 6.60 (m, 2H), 4.26 – 4.16 (m, 1H), 4.10 – 4.04 (m, 1H), 3.64 (s, 2H), 2.75 – 2.61 (m, 2H), 2.60 – 2.52 (m, 1H), 1.99 – 1.91 (m, 1H), 1.73 (s, 1H), 1.60 – 1.38 (m, 12H); <sup>13</sup>C NMR (100 MHz, CDCl<sub>3</sub>): 155.0, 145.0, 133.8, 128.0, 115.3, 79.4, 49.6, 41.8, 32.0, 28.6, 28.4, 27.1; **HRMS** calcd. for C<sub>16</sub>H<sub>25</sub>N<sub>2</sub>O<sub>2</sub><sup>+</sup> 277.1911 [M+H]<sup>+</sup>, found 277.1920.

**(S)-4-(1-allylpiperidin-3-yl)aniline (4c)**

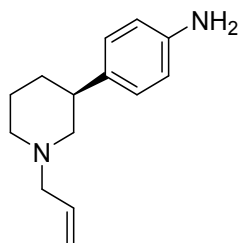

Following General Method 1 with 4-(1-allyl-1,2,5,6-tetrahydropyridin-3-yl)aniline (**4b**) (214 mg, 1.00 mmol) and shaking at 30 °C, 250 r.p.m. for 24 h to afford the title compound as an orange oil (156 mg, 72%).

**Enantioselectivity:** EnelRED-07, 93% ee

**<sup>1</sup>H NMR** (400 MHz, CDCl<sub>3</sub>): δ 7.05 – 6.97 (m, 2H), 6.66 – 6.58 (m, 2H), 5.89 (ddt, *J* = 16.8, 10.1, 6.6 Hz, 1H), 5.19 – 5.07 (m, 2H), 3.54 (s, 1H), 3.05 – 2.92 (m, 4H), 2.71 (tt, *J* = 11.8, 3.7 Hz, 1H), 1.97 – 1.83 (m, 3H), 1.81 – 1.62 (m, 2H), 1.38 (qd, *J* = 12.4, 4.3 Hz, 1H); **<sup>13</sup>C NMR** (100 MHz, CDCl<sub>3</sub>): δ 144.78, 135.41, 135.00, 128.04, 117.83, 115.24, 62.39, 61.65, 53.87, 42.16, 31.73, 25.93; **HRMS** calcd. for C<sub>14</sub>H<sub>21</sub>N<sub>2</sub><sup>+</sup> 217.1699 [M+H]<sup>+</sup>, found 217.1691.

**(S)-4-(piperidin-3-yl)aniline (27)**

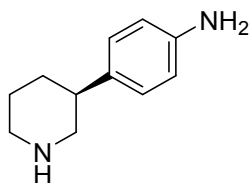

Under nitrogen, RhCl(PPh<sub>3</sub>)<sub>3</sub> (32 mg, 0.03 mmol) was added to a solution of (S)-4-(1-allylpiperidin-3-yl)aniline (**4c**) (150 mg, 0.69 mmol) in MeCN:H<sub>2</sub>O (84:16, w/w, 18 mL). The reaction mixture was stirred at 100 °C for 16 h, cooled to room temperature and diluted with DCM. The organic layer was washed with NaHCO<sub>3</sub> (2 × 20 mL), dried over anhydrous MgSO<sub>4</sub> and concentrated *in vacuo* to yield crude product which was carried forward without further purification (79 mg, 65%). **<sup>1</sup>H NMR** (400 MHz, CDCl<sub>3</sub>): δ 6.93 – 6.85 (m, 2H), 6.59 – 6.51 (m, 2H), 3.27 – 3.16 (m, 2H), 2.89 – 2.58 (m, 3H), 1.98 – 1.88 (m, 1H), 1.87 – 1.80 (m, 1H), 1.80 – 1.65 (m, 1H), 1.59 – 1.42 (m, 1H); **<sup>13</sup>C NMR** (100 MHz, CDCl<sub>3</sub>): δ 145.4, 132.3, 127.9, 115.4, 51.4, 44.8, 40.6, 31.1, 24.4; **GCMS** calcd. for C<sub>11</sub>H<sub>16</sub>N<sub>2</sub> 176.1313 [M], found 176,1200.

**tert-butyl (S)-3-(4-aminophenyl)piperidine-1-carboxylate (24)**

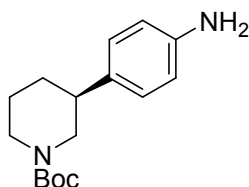

To a mixture of (S)-4-(piperidin-3-yl)aniline (**27**) (79 mg 0.45 mmol) in DCM (5 mL) at 0 °C, Boc anhydride (98 mg, 0.45 mmol) was added and stirred at 0 °C until **27** was consumed (monitored by GC-MS). Then a solution of 7 N NH<sub>3</sub> in MeOH (1 mL) was added and the mixture was stirred for 30 min at 0 °C. After dilution with DCM, the organic layer was washed with NaHCO<sub>3</sub> (2 × 10 mL), dried

over anhydrous  $\text{MgSO}_4$  and concentrated *in vacuo* to yield the crude product. The crude product was subjected to flash column chromatography on silica (gradient elution from 20:1 to 10:1 hexane:MTBE) to afford the title compound as a white solid (110 mg, 89%).  **$^1\text{H NMR}$**  (500 MHz,  $\text{CDCl}_3$ , 273 K):  $\delta$  6.99 – 6.93 (m, 2H), 6.62 – 6.54 (m, 2H), 4.20 – 4.09 (m, 1H), 4.03 – 3.97 (m, 1H), 3.57 (s, 2H), 2.69 – 2.57 (m, 1H), 2.53 – 2.46 (m, 1H), 1.92 – 1.84 (m, 1H), 1.69 – 1.63 (m, 1H), 1.54 – 1.32 (m, 12H);  **$^{13}\text{C NMR}$**  (100 MHz,  $\text{CDCl}_3$ ):  $\delta$  154.9, 145.0, 133.8, 127.9, 115.3, 79.4, 32.0, 28.6, 28.4; **HRMS** calcd. for  $\text{C}_{16}\text{H}_{25}\text{N}_2\text{O}_2^+$  277.1911  $[\text{M}+\text{H}]^+$ , found 277.1898.

**(R)-1-ethyl-3-phenylpiperidine (5c)**

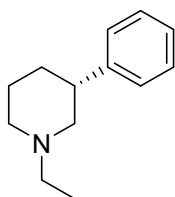

Following General Method 1 with 1-ethyl-5-phenyl-1,2,3,6-THP (**5b**) (187 mg, 1.00 mmol) and shaking at 30 °C, 250 r.p.m. for 16 h to afford the title compound as a pale-yellow oil (163 mg, 86%).

**Enantioselectivity:** EnIRED-01, 86% ee

**$^1\text{H NMR}$**  (400 MHz,  $\text{CDCl}_3$ ):  $\delta$  7.31 – 7.11 (m, 5H), 3.04 – 2.91 (m, 2H), 2.78 (tt,  $J = 11.8, 3.6$  Hz, 1H), 2.38 (q,  $J = 7.2$  Hz, 2H), 1.93 – 1.86 (m, 2H), 1.86 – 1.59 (m, 3H), 1.41 (qd,  $J = 12.4, 4.4$  Hz, 1H), 1.04 (t,  $J = 7.2$  Hz, 3H);  **$^{13}\text{C NMR}$**  (100 MHz,  $\text{CDCl}_3$ ):  $\delta$  145.0, 128.5, 127.4, 126.5, 61.2, 53.6, 52.9, 43.2, 31.8, 26.0, 12.20; **HRMS** calcd. for  $\text{C}_{13}\text{H}_{20}\text{N}^+$  190.1590  $[\text{M}+\text{H}]^+$ , found 190.1581.

**(R)-1-ethyl-3-(4-fluorophenyl)piperidine (6c)**

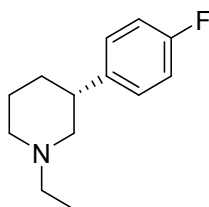

Following General Method 1 with 1-ethyl-5-(4-fluorophenyl)-1,2,3,6-THP (**6b**) (205 mg, 1.00 mmol) and shaking at 30 °C, 250 r.p.m. for 16 h to afford the title compound as a pale-yellow oil (167 mg, 81%).

**Enantioselectivity:** EnelRED-01, 99% ee

**<sup>1</sup>H NMR** (400 MHz, CDCl<sub>3</sub>): δ 7.19 – 7.11 (m, 2H), 6.98 – 6.90 (m, 2H), 2.97 (d, *J* = 11.2 Hz, 2H), 2.85 – 2.73 (m, 1H), 2.40 (q, *J* = 7.2 Hz, 2H), 1.92 – 1.82 (m, 3H), 1.81 – 1.62 (m, 2H), 1.38 (qd, *J* = 12.4, 4.4 Hz, 1H), 1.07 (t, *J* = 7.2 Hz, 3H); **<sup>13</sup>C NMR** (100 MHz, CDCl<sub>3</sub>): δ 162.7, 160.2, 140.6, 128.6, 128.5, 115.2, 115.0, 61.2, 53.4, 52.8, 42.3, 31.9, 25.8, 12.1; **HRMS** calcd. for C<sub>13</sub>H<sub>19</sub>FN<sup>+</sup> 208.1496 [M+H]<sup>+</sup>, found 208.1488.

**(R)-1-ethyl-3-(4-methoxyphenyl)piperidine (7c)**

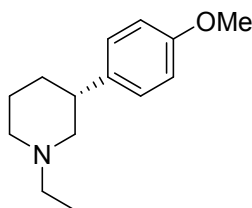

Following General Method 1 with 1-ethyl-5-(4-methoxyphenyl)-1,2,3,6-THP (**7b**) (217 mg, 1.00 mmol) and shaking at 30 °C, 250 r.p.m. for 16 h to afford the title compound as a yellow oil (170 mg, 78%).

**Enantioselectivity:** EnelRED-01, >99% ee

**<sup>1</sup>H NMR** (400 MHz, CDCl<sub>3</sub>): δ 7.20 – 7.12 (m, 2H), 6.89 – 6.80 (m, 2H), 3.79 (s, 3H), 3.06 – 2.95 (m, 2H), 2.78 (tt, *J* = 11.7, 3.6 Hz, 1H), 2.43 (q, *J* = 7.2 Hz, 2H), 1.94 – 1.85 (m, 3H), 1.85 – 1.77 (m, 1H), 1.77 – 1.63 (m, 1H), 1.42 (qd, *J* = 12.4, 4.4 Hz, 1H), 1.09 (t, *J* = 7.2 Hz, 3H); **<sup>13</sup>C NMR** (100 MHz, CDCl<sub>3</sub>): δ 158.2, 137.2, 128.2, 113.9, 61.5, 55.4, 53.6, 52.9, 42.3, 32.0, 26.0, 12.2; **HRMS** calcd. for C<sub>14</sub>H<sub>22</sub>NO<sup>+</sup> 220.1696 [M+H]<sup>+</sup>, found 220.1685.

**(S)-1-ethyl-3-(furan-2-yl)piperidine (8c)**

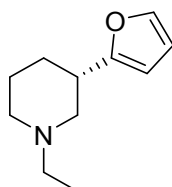

Following General Method 1 with 1-ethyl-5-(furan-2-yl)-1,2,3,6-THP (**8b**) (177 mg, 1.00 mmol) and shaking at 30 °C, 250 r.p.m. for 16 h to afford the title compound as a brown oil (111 mg, 62%).

**Enantioselectivity:** EnelRED-01, >99% ee



**<sup>1</sup>H NMR** (400 MHz, CDCl<sub>3</sub>): δ 7.33 – 7.29 (m, 1H), 6.31 – 6.27 (m, 1H), 6.06 (d, *J* = 3.2 Hz, 1H), 3.46 – 3.39 (m, 1H), 3.38 – 3.22 (m, 2H), 2.82 – 2.73 (m, 2H), 2.35 – 2.24 (m, 2H), 2.14 – 2.03 (m, 2H), 1.91 – 1.83 (m, 1H), 1.52 (qd, *J* = 13.5, 13.0, 3.9 Hz, 1H), 1.30 (t, *J* = 7.3 Hz, 3H); **<sup>13</sup>C NMR** (126 MHz, CDCl<sub>3</sub>): δ 155.9, 141.5, 110.2, 104.9, 56.6, 52.9, 52.7, 34.8, 28.5, 23.7, 10.6; **HRMS** calcd. for C<sub>11</sub>H<sub>18</sub>NO<sup>+</sup> 180.1383 [M+H]<sup>+</sup>, found 180.13758.

**(S)-1-ethyl-3-(thiophen-2-yl)piperidine (9c)**

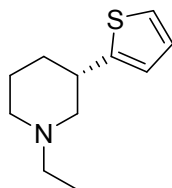

Following General Method 1 with 1-ethyl-5-(thiophen-2-yl)-1,2,3,6-THP (**9b**) (193 mg, 1.00 mmol) and shaking at 30 °C, 250 r.p.m. for 16 h to afford the title compound as a brown oil (166 mg, 85%).

**Enantioselectivity:** EnelRED-01, 86% ee

**<sup>1</sup>H NMR** (400 MHz, CDCl<sub>3</sub>): δ 7.13 (d, *J* = 5.1 Hz, 1H), 6.96 – 6.90 (m, 1H), 6.84 (d, *J* = 3.4 Hz, 1H), 3.29 – 3.16 (m, 2H), 3.08 – 3.00 (m, 1H), 2.53 (q, *J* = 7.2 Hz, 2H), 2.14 – 1.97 (m, 3H), 1.86 – 1.77 (m, 2H), 1.51 – 1.40 (m, 1H), 1.15 (t, *J* = 7.2 Hz, 3H); **<sup>13</sup>C NMR** (100 MHz, CDCl<sub>3</sub>): δ 148.0, 126.7, 123.1, 123.0, 61.0, 53.2, 52.7, 37.8, 33.0, 25.2, 11.7; **HRMS** calcd. for C<sub>11</sub>H<sub>18</sub>NS<sup>+</sup> 196.1154 [M+H]<sup>+</sup>, found 196.1148.

**(R)-1-ethyl-3-(naphthalen-2-yl)piperidine (10c)**

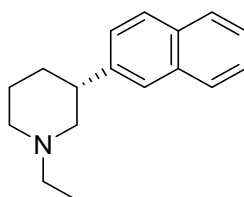

Following General Method 1 with 1-ethyl-5-(naphthalen-2-yl)-1,2,3,6-THP (**10b**) (237 mg, 1.00 mmol) and shaking at 30 °C, 250 r.p.m. for 16 h to afford the title compound as a yellow oil (173 mg, 73%).

**Enantioselectivity:** EnelRED-01, 94% ee

**<sup>1</sup>H NMR** (400 MHz, CDCl<sub>3</sub>): δ 7.83 – 7.76 (m, 3H), 7.67 (s, 1H), 7.49 – 7.36 (m, 3H), 3.18 – 3.10 (m, 1H), 3.10 – 2.95 (m, 2H), 2.48 (q, *J* = 7.2 Hz, 2H), 2.11 – 1.92 (m, 3H), 1.89 – 1.75 (m, 2H), 1.58 (qd, *J* = 12.3, 4.7 Hz, 1H), 1.12 (t, *J* = 7.2 Hz, 3H); **<sup>13</sup>C NMR** (100 MHz, CDCl<sub>3</sub>): δ 142.4, 133.7, 132.5, 128.0, 127.8, 127.7, 126.4, 126.1, 125.5, 125.4, 61.0, 53.7, 52.9, 43.2, 31.8, 26.0, 12.2; **HRMS** calcd. for C<sub>17</sub>H<sub>22</sub>N<sup>+</sup> 240.1747 [M+H]<sup>+</sup>, found 240.1745.

**1-ethyl-5-(naphthalen-2-yl)-1,2,3,4-THP (10e)**

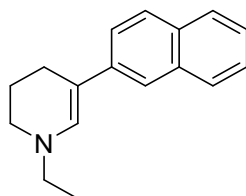

In a 50 mL falcon tube, D-glucose (900 mg, 5.00 mmol), NADP<sup>+</sup> (6 mg, 0.01 mmol), CFE lysate GDH (0.5 mg/mL, CDX-901) CFE lysate EnIRED-01 (10 mg/mL) and purified 6-HDNO (1 mg/mL) were dissolved in 100 mM KP<sub>i</sub> buffer (20 mL, pH 7.0). 1-ethyl-5-(naphthalen-2-yl)-1,2,3,6-THP (**10b**) (237 mg, 1.00 mmol, stock conc. = 1 M in DMSO) was added and the reaction shaken at 30 °C, 250 r.p.m. and monitored by GCMS. The reaction was basified to pH 12 with 10 M NaOH solution and the product extracted into MTBE (3 x 20 mL) with intermediate centrifugation (4 °C, 4000 r.p.m., 3 min) to improve the separation of phases. The organic layers were combined, dried over anhydrous MgSO<sub>4</sub> and concentrated *in vacuo* to give the crude product. The crude product was subjected to flash column chromatography on silica (gradient elution from 100% to 95:5 DCM:methanol) to afford the title compound as a brown oil (149 mg, 63%). **<sup>1</sup>H NMR** (400 MHz, CDCl<sub>3</sub>): δ 7.72 (dd, *J* = 17.9, 8.6 Hz, 3H), 7.56 (dd, *J* = 8.6, 2.0 Hz, 1H), 7.52 (d, *J* = 2.0 Hz, 1H), 7.41 (ddd, *J* = 8.2, 6.9, 1.3 Hz, 1H), 7.32 (ddd, *J* = 8.2, 6.9, 1.3 Hz, 1H), 6.78 (s, 1H), 3.16 – 3.03 (m, 4H), 2.55 (q, *J* = 7.3, 6.4 Hz, 2H), 2.08 (p, *J* = 6.2 Hz, 2H), 1.18 (t, *J* = 7.1 Hz, 3H); **<sup>13</sup>C NMR** (100 MHz, CDCl<sub>3</sub>): δ 139.2, 134.4, 134.31, 131.0, 127.5, 127.5, 127.4, 125.9, 123.9, 122.0, 118.9, 105.7, 50.2, 45.9, 23.3, 22.7, 13.5; **GCMS** calcd. for C<sub>17</sub>H<sub>19</sub>N 237.1517 [M], found 237.1600

**(R)-1-ethyl-3-(naphthalen-2-yl)piperidine (10c)**

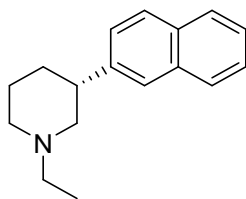

In a 50 mL falcon tube,  $D$ -glucose (900 mg, 5.00 mmol),  $NADP^+$  (6 mg, 0.01 mmol), CFE lysate GDH (0.5 mg/mL, CDX-901) and CFE lysate EneIRED-01 (10 mg/mL) were dissolved in 100 mM  $KP_1$  buffer (20 mL, pH 7.0). 1-ethyl-5-(naphthalen-2-yl)-1,2,3,4-THP (**10e**) (237 mg, 1.00 mmol, stock conc. = 1 M in DMSO) was added and the reaction shaken at 30 °C, 250 r.p.m. for 16 h. The reaction was basified to pH 12 with 10 M NaOH solution and the product extracted into MTBE (3 x 20 mL) with intermediate centrifugation (4 °C, 4000 r.p.m., 3 min) to improve the separation of phases. The organic layers were combined, dried over anhydrous  $MgSO_4$  and concentrated *in vacuo* to give the crude product. The crude was purified on a short pad of celite to afford the title compound as a pale brown oil (210 mg, 88%).

**Enantioselectivity:** EneIRED-01, 94% ee

**(R)-1-methyl-3-phenylpiperidine (11c)**

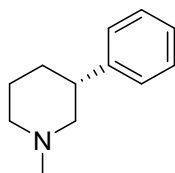

Following General Method 1 with 1-methyl-5-phenyl-1,2,3,6-THP (**11b**) (173 mg, 1.00 mmol) and shaking at 30 °C, 250 r.p.m. for 16 h to afford the title compound as a pale-yellow oil (112 mg, 64%).

**Enantioselectivity:** EneIRED-01, 90% ee

**$^1H$  NMR** (400 MHz,  $CDCl_3$ ):  $\delta$  7.34 – 7.16 (m, 5H), 3.00 – 2.88 (m, 2H), 2.88 – 2.77 (m, 1H), 2.30 (s, 3H), 2.10 – 1.86 (m, 3H), 1.85 – 1.66 (m, 2H), 1.43 (qd,  $J$  = 12.4, 4.5 Hz, 1H);  **$^{13}C$  NMR** (100 MHz,  $CDCl_3$ ):  $\delta$  144.8, 128.5, 127.3, 126.5, 63.4, 56.0, 46.7, 43.2, 31.1, 26.0; **HRMS** calcd. for  $C_{12}H_{18}N^+$  176.1434  $[M+H]^+$ , found 176.1429.

**(A)-3-phenyl-1-(prop-2-yn-1-yl)piperidine (12c)**

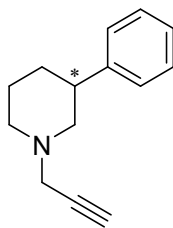

Following General Method 1 with 5-phenyl-1-(prop-2-yn-1-yl)-1,2,3,6-THP (**12b**) (197 mg, 1.00 mmol) and shaking at 30 °C, 250 r.p.m. for 16 h to afford the title compound as a pale-yellow oil (153 mg, 77%).

**Enantioselectivity:** EnelRED-01, >99% ee

**<sup>1</sup>H NMR** (400 MHz, CDCl<sub>3</sub>): δ 7.41 – 7.25 (m, 5H), 3.44 – 3.39 (m, 2H), 3.10 – 2.97 (m, 2H), 2.97 – 2.86 (m, 1H), 2.39 – 2.25 (m, 3H), 2.05 – 1.96 (m, 1H), 1.95 – 1.86 (m, 1H), 1.86 – 1.74 (m, 1H), 1.53 (qd, *J* = 12.5, 4.3 Hz, 1H); **<sup>13</sup>C NMR** (100 MHz, CDCl<sub>3</sub>): δ 144.5, 128.5, 127.3, 126.5, 79.1, 73.2, 59.9, 52.6, 47.4, 43.1, 31.2, 25.8; **HRMS** calcd. for C<sub>14</sub>H<sub>18</sub>N<sup>+</sup> 200.1434 [M+H]<sup>+</sup>, found 200.1443.

#### (A)-1-ethyl-3-methylpiperidine (**13c**)

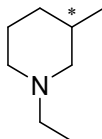

Following General Method 1 with 1-ethyl-5-methyl-1,2,3,6-THP (**13b**) (125 mg, 1.00 mmol) and shaking at 30 °C, 250 r.p.m. for 16 h to afford the title compound which was isolated as a HCl salt using HCl (2M, MeOH) (53 mg, 42%).

**Enantioselectivity:** EnelRED-01, n.d.

**<sup>1</sup>H NMR** (400 MHz, CDCl<sub>3</sub>): δ 11.26 (s, 1H), 3.39 – 3.30 (m, 1H), 3.27 – 3.17 (m, 1H), 3.00 – 2.87 (m, 2H), 2.51 (tdd, *J* = 12.7, 9.7, 2.8 Hz, 1H), 2.26 – 2.13 (m, 2H), 2.13 – 1.99 (m, 1H), 1.77 – 1.67 (m, 2H), 1.30 (t, *J* = 7.3 Hz, 3H), 1.03 – 0.90 (m, 1H), 0.80 (d, *J* = 5.7 Hz, 3H); **<sup>13</sup>C NMR** (100 MHz, CDCl<sub>3</sub>): δ 58.0, 52.3, 51.8, 30.5, 28.6, 22.4, 18.7, 9.0; **HRMS** calcd. for C<sub>8</sub>H<sub>18</sub>N<sup>+</sup> 128.1434 [M+H]<sup>+</sup>, found 128.1429.

#### 1-ethyl-4-methylpiperidine (**15c**)

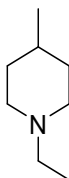

Following General Method 1 with 1-ethyl-4-methyl-1,2,3,6-THP (**15b**) (125 mg, 1.00 mmol) and shaking at 30 °C, 250 r.p.m. for 16 h to afford the title compound which was isolated as a HCl salt using HCl (2M, MeOH) ( 55 mg, 34%). **<sup>1</sup>H NMR** (400 MHz, CDCl<sub>3</sub>): δ 10.87 (s, 1H), 3.43 (d, *J* = 11.5 Hz, 2H), 3.09 – 2.96 (m, 2H), 2.79 – 2.65 (m, 2H), 1.87 – 1.75 (m, 3H), 1.67 – 1.56 (m, 1H), 1.36 (t, *J* = 7.0 Hz, 3H), 0.99 (dd, *J* = 11.9, 6.5 Hz, 1H), 0.91 (d, *J* = 6.3 Hz, 3H); **<sup>13</sup>C NMR** (100 MHz, CDCl<sub>3</sub>): δ 52.3, 52.3, 30.8, 29.1, 20.9, 9.3; **HRMS** calcd. for C<sub>8</sub>H<sub>18</sub>ClN<sup>+</sup> 128.1434 [M-Cl]<sup>+</sup>, found 128.1430.

#### 1-ethyl-4-phenylpiperidine (**16c**)

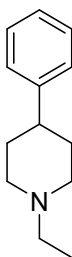

Following General Method 1 with 1-ethyl-4-phenyl-1,2,3,6-THP (**16b**) (187 mg, 1.00 mmol) and shaking at 30 °C, 250 r.p.m. for 24 h to afford the title compound as a yellow oil (117 mg, 62%). **<sup>1</sup>H NMR** (400 MHz, CDCl<sub>3</sub>): δ 7.26 – 7.07 (m, 5H), 3.01 (dt, *J* = 11.4, 3.4 Hz, 2H), 2.49 – 2.32 (m, 3H), 1.94 (td, *J* = 11.1, 4.1 Hz, 2H), 1.82 – 1.66 (m, 4H), 1.05 (t, *J* = 7.2 Hz, 3H); **<sup>13</sup>C NMR** (100 MHz, CDCl<sub>3</sub>): δ 146.6, 128.5, 127.0, 126.2, 54.1, 52.8, 43.0, 33.6, 12.2; **HRMS** calcd. for C<sub>13</sub>H<sub>19</sub>N<sup>+</sup> 190.1590 [M+H]<sup>+</sup>, found 190.1585.

#### 1-ethyl-3,4-dimethylpiperidine (**17c**)

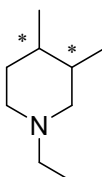

Following General Method 1 with 1-ethyl-4,5-dimethyl-1,2,3,6-THP (**17b**) (139 mg, 1.00 mmol) and shaking at 30 °C, 250 r.p.m. for 16 h to afford the title compound as a colourless oil (76 mg, 54%).

**Diastereoselectivity:** EnelRED-01, *trans* 69:31 dr, 89% ee

**<sup>1</sup>H NMR** (400 MHz, CDCl<sub>3</sub>): δ 3.55 – 2.95 (m, 5H), 1.44 (t, *J* = 7.3 Hz, 3H), 1.36 – 1.06 (m, 4H), 1.04 – 0.88 (m, 7H); **<sup>13</sup>C NMR** (100 MHz, CDCl<sub>3</sub>): δ 52.4, 36.2, 34.8, 31.2, 31.0, 29.8, 18.5, 16.5, 9.3; **HRMS** calcd. for C<sub>9</sub>H<sub>20</sub>N<sup>+</sup> 142.1590 [M+H]<sup>+</sup>, found 142.1586.

### 2-ethyldecahydroisoquinoline (18c)

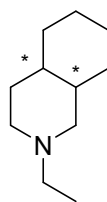

Following General Method 1 with 2-ethyl-1,2,3,4,5,6,7,8-octahydroisoquinoline (**18b**) (165 mg, 1.00 mmol) and shaking at 30 °C, 250 r.p.m. for 24 h to afford the title compound as a colourless oil (114 mg, 68%).

**Diastereoselectivity:** EnelRED-01, *cis* 90:10 dr, >99% ee

**<sup>1</sup>H NMR** (400 MHz, CDCl<sub>3</sub>): δ 3.02 – 2.63 (m, 4H), 2.13 – 0.97 (m, 17H); **<sup>13</sup>C NMR** (100 MHz, CDCl<sub>3</sub>): δ 58.1, 53.1, 52.7, 40.8, 39.2, 32.0, 30.2, 29.8, 26.1, 25.4, 10.1; **HRMS** calcd. for C<sub>11</sub>H<sub>22</sub>N<sup>+</sup> 168.1747 [M+H]<sup>+</sup>, found 168.1751.

### 1-ethyl-4-methyl-3-phenylpiperidine (19c)

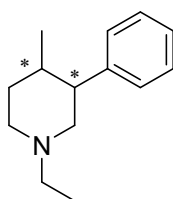

Following General Method 1 with 1-ethyl-4-methyl-5-phenyl-1,2,3,6-THP (**19b**) (201 mg, 1.00 mmol) and shaking at 30 °C, 250 r.p.m. for 16 h to afford the title compound as a yellow oil (177 mg, 87%).

**Diastereoselectivity:** EnelRED-01, *cis* 98:2 dr

**<sup>1</sup>H NMR** (400 MHz, CDCl<sub>3</sub>): δ 7.32 – 7.25 (m, 4H), 7.24 – 7.15 (m, 1H), 3.11 – 3.02 (m, 1H), 2.78 – 2.70 (m, 1H), 2.66 – 2.53 (m, 2H), 2.47 (q, *J* = 7.2 Hz, 2H), 2.39 – 2.35 (m, 1H), 2.13 – 2.02 (m, 1H), 1.97 – 1.84 (m, 1H), 1.65 – 1.54 (m, 1H), 1.11 (t, *J* = 7.2 Hz, 3H), 0.71 (d, *J* = 7.2 Hz, 3H); **<sup>13</sup>C NMR** (100 MHz, CDCl<sub>3</sub>): δ 142.6, 128.6, 128.2, 126.3, 58.3, 52.9, 44.2, 32.3, 31.4, 29.8, 18.5, 11.6; **HRMS** calcd. for C<sub>14</sub>H<sub>22</sub>N<sup>+</sup> 204.1747 [M+H]<sup>+</sup>, found 204.1750.

### 1-allyl-4-methyl-3-phenylpiperidine (20c)

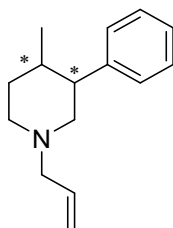

Following General Method 1 with 1-allyl-4-methyl-5-phenyl-1,2,3,6-THP (**20b**) (213 mg, 1.00 mmol) and shaking at 30 °C, 250 r.p.m. for 16 h to afford the title compound as a yellow oil (191 mg, 89%).

**Diastereoselectivity:** EnelRED-01, *cis* 96:4 dr

**<sup>1</sup>H NMR** (400 MHz, CDCl<sub>3</sub>): δ 7.36 – 7.24 (m, 4H), 7.24 – 7.16 (m, 1H), 5.91 (ddt, *J* = 16.8, 10.1, 6.5 Hz, 1H), 5.26 – 5.15 (m, 1H), 5.15 – 5.08 (m, 1H), 3.10 – 2.97 (m, 3H), 2.77 – 2.61 (m, 2H), 2.59 – 2.51 (m, 1H), 2.47 – 2.42 (m, 1H), 2.10 – 2.03 (m, 1H), 1.90 – 1.82 (m, 1H), 1.67 – 1.54 (m, 1H), 0.71 (d, *J* = 7.1 Hz, 3H); **<sup>13</sup>C NMR** (100 MHz, CDCl<sub>3</sub>): δ 143.6, 135.8, 128.5, 128.0, 126.0, 117.5, 62.5, 54.2, 51.0, 45.3, 32.9, 32.0, 19.8; **HRMS** calcd. for C<sub>15</sub>H<sub>22</sub>N<sup>+</sup> 216.1747 [M+H]<sup>+</sup>, found 216.1738.

## 5.2. Deuterium Labelling Experiments

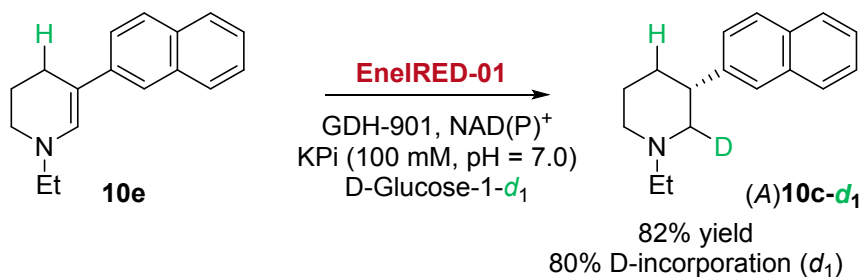

### (3A)-1-ethyl-3-(naphthalen-2-yl)piperidine-2-*d* (10c)

In a 50 mL falcon tube, D-glucose-1-*d*<sub>1</sub> (900 mg, 5.00 mmol), NADP<sup>+</sup> (6 mg, 0.01 mmol), GDH (0.5 mg/mL, CDX-901) and EnelRED-01 CFE (10 mg/mL) were dissolved in 100 mM KPi buffer (20 mL, pH 7.0). 1-ethyl-5-(naphthalen-2-yl)-1,2,3,4-THP (**10e**) (237 mg, 1 mmol, stock conc. = 1 M in DMSO)

was added and the reaction shaken at 30 °C, 250 r.p.m. for 16 h. The reaction was basified to pH 12 with 10 M NaOH solution and the product extracted into MTBE (3 x 20 mL) with intermediate centrifugation (4 °C, 4000 r.p.m., 3 min) to improve the separation of phases. The organic layers were combined, dried over anhydrous MgSO<sub>4</sub> and concentrated *in vacuo* to give the crude product. The crude was purified on a short pad of celite to afford the title compound as pale yellow oil (197 mg, 82%). **<sup>1</sup>H NMR** (400 MHz, CDCl<sub>3</sub>): δ 7.84 – 7.75 (m, 3H), 7.69 – 7.64 (m, 1H), 7.50 – 7.36 (m, 3H), 3.20 – 2.97 (m, 2H), 2.49 (qd, *J* = 7.2, 1.5 Hz, 2H), 2.12 – 2.05 (m, 1H), 2.05 – 1.93 (m, 2H), 1.92 – 1.74 (m, 2H), 1.59 (qd, *J* = 12.2, 5.1 Hz, 1H), 1.13 (t, *J* = 7.2 Hz, 3H); **<sup>13</sup>C NMR** (100 MHz, CDCl<sub>3</sub>): δ 142.3, 133.7, 132.5, 128.0, 127.8, 127.7, 126.4, 126.1, 125.5, 125.4, 60.9, 53.6, 52.9, 43.0, 31.7, 25.9, 12.1; **GCMS** calcd. for C<sub>17</sub>H<sub>20</sub>DN 240.1737 [M], found 240.1400.

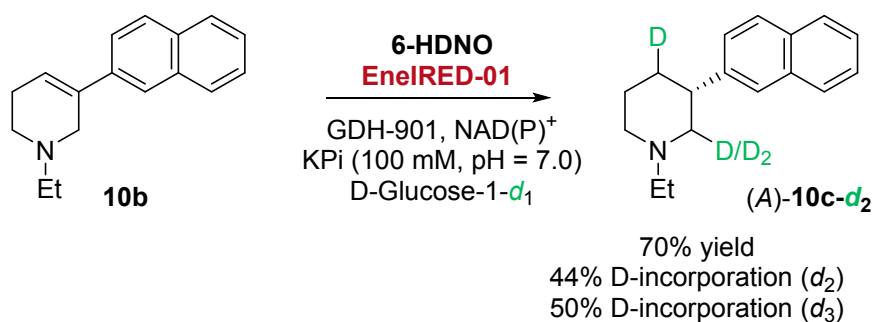

### (3A)-1-ethyl-3-(naphthalen-2-yl)piperidine-2,4-*d*<sub>2</sub> (10c)

In a 50 mL falcon tube, >98% D-glucose-1-*d*<sub>1</sub> (900 mg, 5.00 mmol), NADP<sup>+</sup> (6 mg, 0.01 mmol), GDH (0.5 mg/mL, CDX-901) EnelRED-01 CFE (10 mg/mL) and purified 6-HDNO (1 mg/mL) were dissolved in 100 mM KP<sub>i</sub> buffer (20 mL, pH 7.0). 1-ethyl-5-(naphthalen-2-yl)-1,2,3,6-THP (**10b**) (237 mg, 1.00 mmol, stock conc. = 1 M in DMSO) was added and the reaction shaken at 30 °C, 250 r.p.m. for 16 h. The reaction was basified to pH 12 with 10 M NaOH solution and the product extracted into MTBE (3 x 20 mL) with intermediate centrifugation (4 °C, 4000 r.p.m., 3 min) to improve the separation of phases. The organic layers were combined, dried over anhydrous MgSO<sub>4</sub> and concentrated *in vacuo* to give the crude product. The crude was purified on a short pad of celite to afford the title compound as yellow oil (169 mg, 70%). **<sup>1</sup>H NMR** (400 MHz, CDCl<sub>3</sub>): δ 7.84 – 7.74 (m, 3H), 7.66 (s, 1H), 7.50 – 7.35 (m, 3H), 3.20 – 2.96 (m, 2H), 2.52 – 2.44 (m, 2H), 2.11 – 1.92 (m, 3H), 1.90 – 1.72 (m, 2H), 1.12 (t, *J* = 7.2 Hz, 3H); **<sup>13</sup>C NMR** (100 MHz, CDCl<sub>3</sub>): δ 142.4, 133.7, 132.5, 128.0, 127.8, 127.7, 126.4, 126.1, 125.4, 125.3, 53.6, 52.8, 42.9, 42.8, 29.8, 25.8, 25.7, 12.1; **GCMS** calcd. for C<sub>17</sub>H<sub>19</sub>D<sub>2</sub>N 241.1800 [M], found 241.1900.



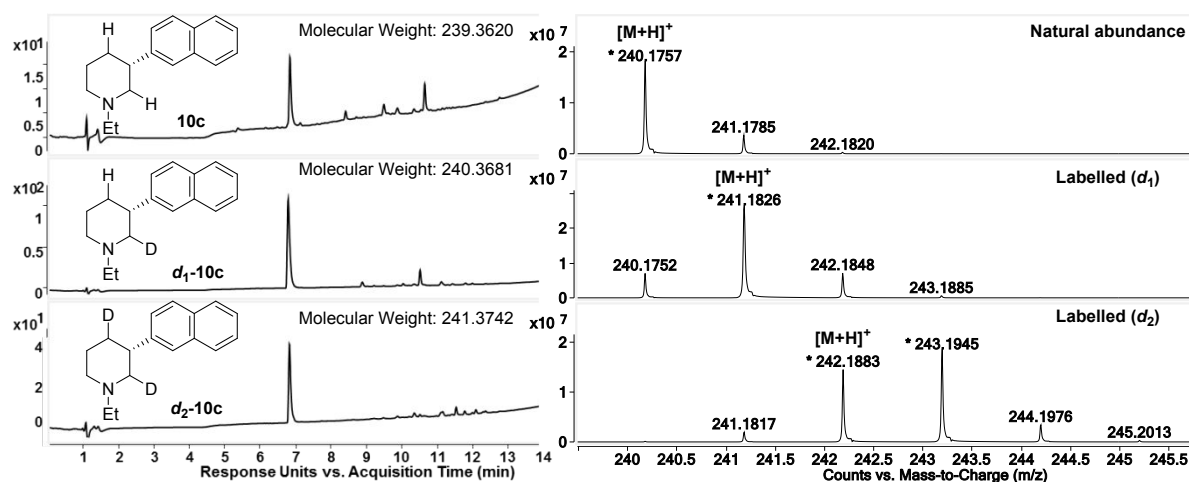

**Figure S8:** Comparison between LC and positive ion ESI-MS traces relevant to the deuterium labelling experiments.

**Table S4:** Experimental high resolution mass of natural abundance **10c**.

| Natural abundance | [M+H] <sup>+</sup> (m/z) | Abundance   |
|-------------------|--------------------------|-------------|
|                   | 240.1757                 | 18285096.72 |
|                   | 241.1785                 | 3658588.57  |
|                   | 242.182                  | 284262.12   |

**Table S5:** Experimental high resolution mass of the isotopically enriched **d<sub>1</sub>-10c** compared to the natural abundance **10c**.

| Mono-deuterated | [M+H] <sup>+</sup> (m/z) | Abundance   | Contribution of Nat. Abd. |
|-----------------|--------------------------|-------------|---------------------------|
| Nat. Abd.       | 240.1752                 | 7023949.66  | -                         |
| Nat. Abd. + d1  | 241.1826                 | 26914571.93 | 1405392.727               |
| Nat. abd + d1   | 242.1848                 | 7199602.81  | 109195.0921               |
| d1              | 243.1885                 | 594515.6    | -                         |

$$\% \text{Nat. Abd.} = \left[ \frac{\text{sum of Nat. Abd.}}{\text{sum of all Abundances}} \right] \times 100 = 20.5\%$$

$$\% \text{Dincorp (d1)} = \left[ \frac{\text{sum of Abundance of d1}}{\text{sum of all Abundances}} \right] \times 100 = 79.5\%$$

**Table S6:** Experimental high resolution mass of the isotopically enriched **d<sub>2</sub>-10c** compared to the contributions worked out with predicted % values from isotopic distribution calculator.<sup>a</sup>

| Double-deuterated | [M+H] <sup>+</sup> (m/z) | Abundance   | Contribution of d1 <sup>a</sup> | Contribution of d2 <sup>a</sup> | Contribution of d3 <sup>a</sup> |
|-------------------|--------------------------|-------------|---------------------------------|---------------------------------|---------------------------------|
| d1                | 241.1817                 | 2001409.02  | -                               | -                               | -                               |
| d2 + d1           | 242.1883                 | 14479708.87 | 380067.5729                     | 14099641.3                      | -                               |
| d2 + d1 +d3       | 243.1945                 | 18708050.83 | 34023.95334                     | 2676111.918                     | 15997914.96                     |
| d2 +d3            | 244.1976                 | 3534357     | -                               | 239693.9021                     | 3294663.098                     |
| d3                | 245.2013                 | 299768.97   | -                               | -                               | 271964.5543                     |

$$\%Dincorp (d1) = \left[ \frac{\text{sum of Abundance of } d1}{\text{sum of all Abundances}} \right] \times 100 = 6.2\%$$

$$\%Dincorp (d2) = \left[ \frac{\text{sum of Abundance of } d2}{\text{sum of all Abundances}} \right] \times 100 = 43.6\%$$

$$\%Dincorp (d3) = \left[ \frac{\text{sum of Abundance of } d3}{\text{sum of all Abundances}} \right] \times 100 = 50.1\%$$

### Discussion:

<sup>1</sup>H, GCMS and LC-HMRS data all support the conclusion that the nicotinamide cofactor is the hydride-source. Examination of the <sup>1</sup>H-NMR trace of the reaction **10e** run with D-glucose-1-*d*<sub>1</sub> reveals nearly complete suppression of one C-2 proton signal. The <sup>1</sup>H-NMR trace of the product isolated from the reaction of **10b** run with D-glucose-1-*d*<sub>1</sub> shows high suppression of one C-2 and one C-4 proton signals (see **section 14**). Additional evidence for deuterium incorporation in compounds **d<sub>1</sub>-10c** and **d<sub>2</sub>-10c** can be found in the GCMS traces (see **section 8**, Fig. S28). The extent of deuterium incorporation can be calculated using comparison between high resolution positive ion ESI-MS (Fig. S8). The LC-HRMS gives a calculated 79.5% D-incorporation for product **d<sub>1</sub>-10c** and a mixture of *d*<sub>2</sub> and *d*<sub>3</sub> for product **d<sub>2</sub>-10c** (44.3% and 50.1% D-incorporation respectively). The D-incorporation calculations for product **d<sub>2</sub>-10c** shows some evidence of a non-productive pathway where EneIRED-01-catalysed C=N bond reduction of endocyclic α,β-unsaturated iminium (DHP) contends with the EneIRED-01-catalysed C=C bond conjugate reduction. In the presence of 6-HDNO, the THP produced is re-activated and ultimately a mixture of deuterated **d<sub>2</sub>-10c** and **d<sub>3</sub>-10c** is formed.

## 6. Cloning, expression, and purification protocols of biocatalysts

### 6.1. Amine oxidases

Preparation of MAO-N D5, D9, D11 and 6-HDNO E350L/E352D mutants used in this study are described in former publications<sup>4-6</sup>. Relevant genes were cloned into the vector pET16b using NdeI/BamHI (restriction enzymes from New England Biolabs) restriction sites encoding an *N*-terminal poly-histidine tag for subsequent downstream affinity purification of the enzyme. Following successful cloning as confirmed through Sanger Sequencing (Eurofins, Luxembourg), the pET16b-amine oxidase construct was transformed into chemically competent *E. coli* BL21 (DE3) (New England Biolabs) for recombinant protein expression.

For flask scale expression, overnight cultures were prepared by inoculating ~6 mL of lysogeny broth (LB) supplemented with 100 µg/mL ampicillin from a single colony, and subsequently grown for 16 h at 37 °C at 250 r.p.m. The overnight culture was used to inoculate a 2 L baffled Erlenmeyer flask containing 600 mL auto induction media (LB broth base including trace elements), supplemented with 100 µg/mL ampicillin. The culture was incubated for 48 h, 25 °C, 200 r.p.m. Cells were harvested by centrifugation and cell pellets were collected.

Buffer A: 100 mM KPi pH 7.8 + 300 mM NaCl + 30 mM imidazole. Buffer B: 100 mM KPi pH 7.8 + 300 mM NaCl + 1 M imidazole.

For affinity purification, cell pellets were re-suspended in Buffer A (~1 g cell / 3 mL) and lysed first by adding lysozyme (Sigma) (1 mg/mL) and incubating at 30 °C for 20 min. Further lysis was performed by sonication under the following conditions: (20s on, 20s off, x12 cycles) using a Soniprep 150 (MSE UK Ltd.) whilst the suspended cell solution was kept on an ice bath. Lysed cells were clarified using a JA-25.50 Aluminium Fixed-Angle Rotor in a Beckman Coulter centrifuge at 18000 r.p.m. for 45 min. The CFE lysate was loaded onto a HisTrap 5 mL FastFlow column (GE Healthcare) and the column washed with 10 mL Buffer A before the protein was eluted with a gradient of 0 – 100% Buffer B over 30 min using an AKTA (Cytiva). Fractions corresponding to the peak at 280 nM were checked for purity by SDS-PAGE (Tris/glycine 4–20% Tris-Hepes gel, NuSep) (Fig. S9 and S10). These fractions were pooled concentrated and buffer exchanged into 0.1 M potassium phosphate buffer, pH 7.8, by spin column (Vivaspin 6, 30 kDa cutoff, GE Healthcare). Purified protein was stored at 4 °C until use.

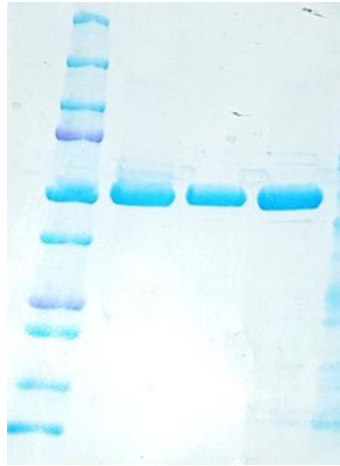

**Figure S9: Weight Marker (PageRuler™ PreStained Protein Ladder):** 10 kDa, 15 kDa, 25 kDa, 35 kDa, 40 kDa, 55 kDa, 70 kDa, 100 kDa, 130 kDa, 180 kDa,. **SDS-PAGE 1** Lane 1: Molecular Weight Marker. Lane 2: Pure fractions MAO-N D5. Lane 3: Pure fractions MAO-N D9. Lane 4: Pure fractions MAO-N D11.

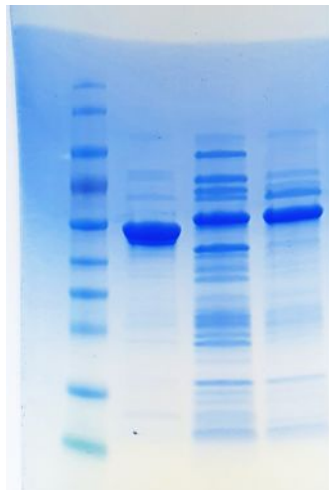

**Figure S10: Weight Marker (PageRuler™ PreStained Protein Ladder):** 10 kDa, 15 kDa, 25 kDa, 35 kDa, 40 kDa, 55 kDa, 70 kDa, 100 kDa, 130 kDa, 180 kDa,. **SDS-PAGE 1** Lane 1: Molecular Weight Marker. Lane 2: Pure fractions 6-HDNO. Lane 3: CFE lysate MAO-N D9. Lane 4: CFE lysate MAO-N D11.

## 6.2. IREDs

All the IREDs described in this study were obtained and expressed using the protocols described previously in: <https://doi.org/10.1038/s41557-020-00606-w>

All IREDs were expressed through recombinant expression using *E. coli* as the host. Flask scale expression of the selected metagenomic enzymes was performed in a 2 L Erlenmeyer baffled flask. Initially, a single colony following transformation of the pET28a-IRED construct into chemically competent *E. coli* BL21(DE3) was used to inoculate 20 mL of lysogeny broth (LB) media supplemented with 35 µg/mL of kanamycin. This culture was incubated at 37 °C for 16 h, 200 r.p.m.

This pre-culture was then used to inoculate 400 mL of Terrific Broth (TB) (Formedium, Hunstanton, Norfolk, UK) in a 2 L Erlenmeyer baffled flask supplemented with 35 µg/mL of kanamycin. This was then incubated at 37 °C, 200 r.p.m. for 1.5 h. The culture was then induced with 0.1 mM of isopropyl β-d-1-thiogalactopyranoside (IPTG) and then incubated at 23 °C, 200 r.p.m. for a further 24 h. Cell pellets were then collected by centrifugation.

*E. coli* cell pellets were then processed to obtain the biocatalyst, or the desired IRED in crude CFE lysate format through resuspension of wet-cell pellet, lysis, centrifugation and lyophilisation. *E. coli* cells were resuspended to approx. 5x wet-cell pellet weight in 0.1 M sodium phosphate pH 7.0. Lysis was undertaken using a MSE Soniprep 150 sonicator with a precooled 9.5 mm probe at amplitude 16 microns with 1 minute bursts per 50 mL of re-suspended cells with 5x repetitions. Lysed cells were clarified using a JA-25.50 Aluminium Fixed-Angle Rotor in a Beckman Coulter centrifuge for 45 min at 18,000 r.p.m. Following clarification the supernatant of the *E. coli* CFE lysate expressing the selected IRED was decanted. This CFE lysate was then lyophilised in a Lyovapor™ L-200 (Buchi, Suffolk, UK). Protein expression was then monitored *via* 4-20% SDS-PAGE.

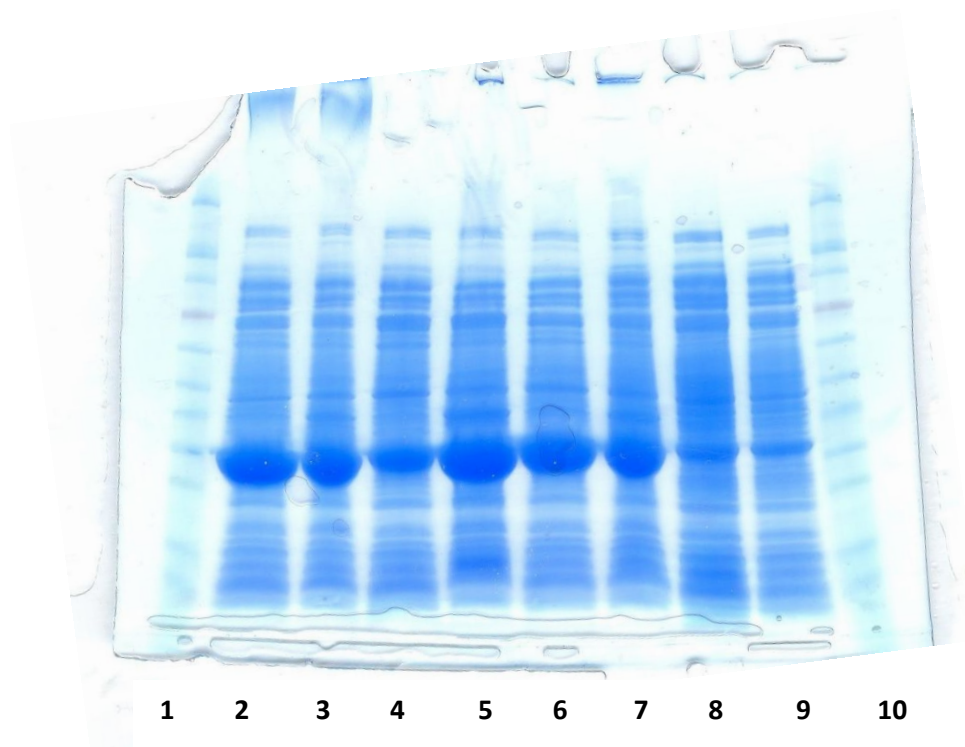

**Figure S11: Molecular Weight Marker (PageRuler™ PreStained Protein Ladder):** 10 kDa, 15 kDa, 25 kDa, 35 kDa, 40 kDa, 55 kDa, 70 kDa, 100 kDa, 130 kDa, 180 kDa,. Lane 1: Molecular Weight Marker. Lane 2: EnelRED-06 WC. Lane 3: EnelRED-06 CFE. Lane 4: EnelRED-01 WC. Lane 5:

EneIRED-01 CFE. Lane 6: EneIRED-08 WC. Lane 7: EneIRED-08 CFE. Lane 8: EneIRED-05 WC.  
Lane 9: EneIRED-05 CFE. Lane 10: Molecular Weight Marker.

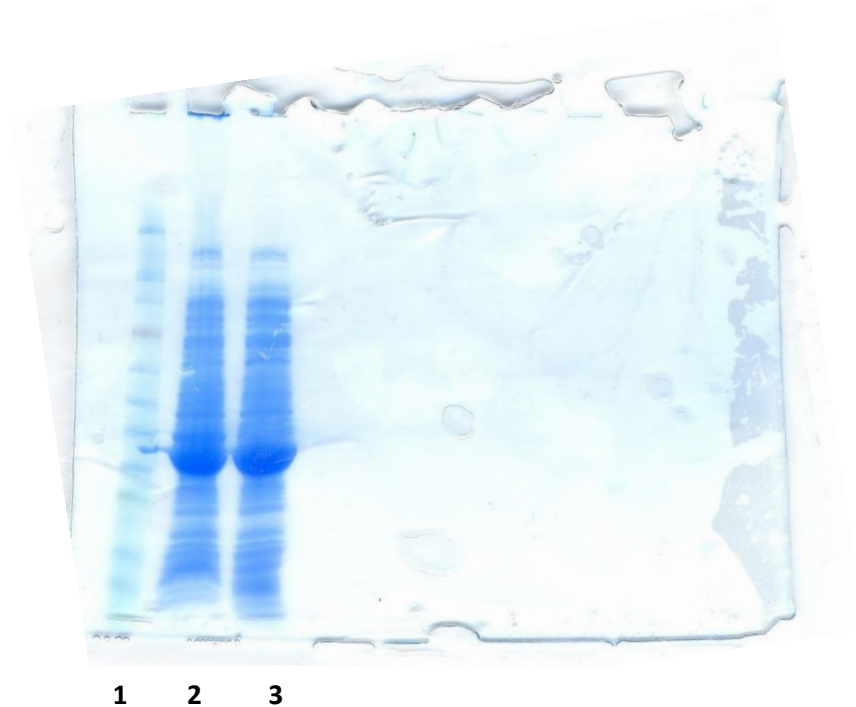

**Figure S12: Molecular Weight Marker (PageRuler™ PreStained Protein Ladder):** 10 kDa, 15 kDa, 25 kDa, 35 kDa, 40 kDa, 55 kDa, 70 kDa, 100 kDa, 130 kDa, 180 kDa,. Lane 1: Molecular Weight Marker. Lane 2: EneIRED-07 WC. Lane 3: EneIRED-07 CFE.

### 5.2.1. EneIRED Amino Acid Sequence Information

```

>EneIRED-01
MSMSGSNKPSVSVLGLGAMGSVLARTLLQAGYGVTVWNRS PERATALVQEGASLAREASE
AINASNLI IICMIDKAVFQDVLSSLDPLLNMSGKTIVNMSTGTVDDVERIAKRVDQHNGL
YVDAGIMCYPKDIGGQHTTILYSGNSDAYHAHESTLKVLAGNPKFLGADPTACTPTYLAL
YAFYFGAFAAWLEGAVLASCAGVSVQDFKALSPIMSDMLVDGIKTAADRIAASDYSGEQA
SVDVHVAGQEVVLDALQRANAPHASTDAYLSYCRMAQTAGMGELD IASLFKAMHP*
>EneIRED-02
MNVTTPEPTTVAVIIGLGNLQVLRARTLLDQGHKVTVWNRSQDKADDLVARGATRAATPAD
AIRASDLV IICVLDYTTVRDLLTPAADALAGR VVVNVTSGIPEPARELATRVNGSGAA YV
DGAVYAI PQTIGTPEAFVLYSGDEEAFARHRALLET LGTAEFVGADAGLAAVHDVALLSG
MYGMFAGFFQTVAVSGSAGIEAVRVTELLVRWLKEA IAALPAFAAEIDAGDYRTQTSNLD
INAVGLANILAATRAQGVGVELLAPLHALFEQQVSAGHGAESLSRTIESLR
>EneIRED-03
MNMTTSRNVTAFGVGNMGAALAHALLKADTKVTIWNRTVDRPQVQSVLKAGATLEADVKA
AISGSSDILLFCLIDYDAMYKTLEPIKGTSDGLAGKTIVNVTNGTTPQQALEM RDWIKARG
AARYFDGAVLVTPQM VATPQSLLVYSGESQETFDNIKTILQPLGTPLYYGPQVDAAA AQD
LAMLATMYGMFYGAFVGF GILKRSGQQDVKVAPGTKQITIPVMAALTEYLG LLLADVIDS
EDWASNGGNPLLMQVAGVANI IQAAKDANVNASGLEVLAEAMGKAVEDGWADGNVAAAAK
FI
>EneIRED-04
MSTSGSNKPCVSVLGLGAMGSVLARTLLQAGYGVTVWNRS PARATALLQEGASLAREASE
AINASNLI IVC MIDKAASQDVLSSLDPLLDMMSGKTIVNMSTGTVDDVQRIARQVSHNGL
YVDAGIMCYPKDIGGQHTTILYSGNSDAYHAHESTLKVLAGNPKFLGADPTACTPTYLAL
YAFYFGAFAAWLEGAVLASCAGVSVQDFKALSPIMSDMLVDGINTAADRIAASDFSGEQA
SVDVHVAGQEVVLDALQRAKAPHASTHAYLSYCRMAQTAGMGELD IASLFKAMHP*
>EneIRED-05
MSSKQKITVIGLGMGATIARLYLEQGHEVTIWNRSADKAAPLVAQGAVLADSAAAAVRA

```

SRVVLVCVYDYRAADAILGAEGVAAAMDGRLLVQLTTGSPRDARDAQAWAQRHGATFLEG  
AIQAAPEQMKGDTPIILMSGDEQVFRAVEPLLAVLGGGIVYLGEKISNAAAMDLATLSTI  
YGTMLGFLHGARVAESEGFVDAEFGRIVAGIMPTFASFLLQHEGAVIQSGDFKISQSPMRI  
SVEATQRILQTARESGINSEFPFAAAGLFRADAAGLGGEELAALIKLLRAPA

>EneIRED-06

MQPAISVLGTGRMGSAALAYALLKAGHPTTVWNRTPAKAAPLAAAAGAEVAASVRNAVAVSE  
VVIVNVSDYQATQSLLRDKEVAGALEGRLLIELTSGTDPDGGREAHGWAQRQGARYLDGAI  
LATPDFIGTEAGTLLVSGPSGVFEEGRNVLGALGGNVQFIGEDPGLANALDSAVLALMWG  
ALFGALQSIIVCRAEAIDLGVLARQWTATAPVVEGLVSDLIKRSAAAGRYDADAETLSSVS  
PHYSAFHHLVLDLMEARGIDRTITGGYEAIFFRAIEAGHLHDDFASLSQFMGQPA\*

>EneIRED-07

MSDPNADRPPVTVVGLGLMGQALAAAFLKGGHPTTVWNRSPEKAERLVADGAVLADTLES  
AVTASPLVIVCVSDYDAVHELIRPVESALAGRVLVNLTATSTQARETAEWAAQRNIPYL  
DGAIMAIPPVIGTDGAVLLYSGHKSFAFEAHESTLKAIPAAATTYLEEDHGLSSLYDMALL  
GIMWGILNGFLHGAALLGTAKVKAETFAPLANTMISAITTEYVTAYAPQVDEGRYEATDAT  
MTVHQAAMEHLAAESEHLGIHSELPRFFKTLADRAVADGHAENSYAAMIELFRKPTA

>EneIRED-08

MPHASQSVTIIGLGPMPQAMAAAYLDRGYDVTLWNRTPSRADALVARGATLAPTAEQALS  
AAELVILSLTDFDAMYAILEPAKDAVAGRTLVLNLSDDTPEKARAGARWVAELGGTHLTGG  
VLCPPPLIGTPTDSTFYSGPREAYDAHRATLEVIITGKSDYRGDDQGLAALMYQLNMFIFW  
PAMVAYWQAVAVAGAHGIQAREIAPYVTENFAGMGHFIDFYASRVDAAGNHAGDVDRASMG  
LASMEHVVHTASDAGVDTAFPAAVHDFVRRVVEAGHGADSFVWAVELLKKR

>EneIRED-09

MSSVSIIFGLGAMGTAMAARFLEKNFKVTVWNRTPEKANKLLDKGASVSNTVLDGINASDL  
IIVCLLDNAAVQTTFDQALEHVRGKTVINLTNGTPKQARKLSELFVSHGSQYVHGGIMAT  
PSMIGSPHALILYSGSKDAYNTTESTLSLLAKGWFLGDDAGVASLHDLALLSGMYGLFSG  
FFHATALVQSSTPATKFLDLLLPWLGAMTEYKAMAQQVDDGKYSSEGSNMAMQLVAIQN  
IADASADQGVSAFDIHPMRDFVQRAVDAGHGSDDISALISFMKS

## **7. Protein Crystallization of EneIRED-07; Data Collection and Refinement**

### **7.1. Gene expression and protein purification**

The LIC3C plasmid containing the gene for EneIRED-07 was used to transform *E. coli* BL21 (DE3) competent cells for gene expression. Pre-cultures were grown in LB-medium (10 mL) containing 30 µg/mL kanamycin for 18 h at 37 °C with shaking at 180 r.p.m. 1 L volume cultures were inoculated with the pre-culture (10 mL) and incubated at 37 °C, with shaking at 180 r.p.m. until an OD600 of 0.6-0.8 was reached. Gene expression was induced by addition of IPTG (1 mM) and shaking was continued overnight at 16 °C at 180 r.p.m. The cells were then harvested by centrifugation at 5000 x g for 20 min and resuspended in 50 mM Tris buffer pH 7.1, containing 300 mM NaCl. Cells were disrupted using a French press, and the suspension was centrifuged at 15,000 x g for 40 min to yield a clear CFE lysate. The CFE lysate was loaded onto a pre-equilibrated Ni-NTA column, followed by washing with a load buffer (50 mM Tris-HCl, 300 mM NaCl, pH 7.1). The bound protein was eluted using the same buffer with a linear gradient of 0-500 mM imidazole. EneIRED-07 fractions were pooled, concentrated and loaded onto a HiLoad 16/600 Superdex 75 gel filtration column pre-equilibrated with 50 mM Tris-HCl, 300 mM NaCl pH 7.1 buffer. The concentrated protein sample after gel filtration was used for crystallization screening.

### **7.2. Protein crystallization**

Initial screening of crystallization conditions was performed using commercially available INDEX (Hampton Research), PACT premier and CSSI/II (Molecular Dimensions) screens in 96-well sitting drop trays. Optimization was carried out in a 48-well sitting-drop format to obtain crystals for X-ray diffraction studies. For co-crystallization experiments, a 0.1 M stock solution of cofactor NADP<sup>+</sup> in water was prepared. Crystals of the EneIRED-07-NADP<sup>+</sup> complex were grown using EneIRED-07 concentrated to 25 mg/mL in 50 mM Tris buffer at pH 7.1 containing 300 mM NaCl. The crystallization drop contained 0.15 µL protein: 0.15 µL mother liquor, comprising 0.1 M Tris pH 8.5, 20% PEG (polyethylene glycol) 3350 w/v, 0.1 M MgCl<sub>2</sub>, and 2.0 mM NADP<sup>+</sup>. Crystals were harvested directly into liquid nitrogen with nylon CryoLoops™ (Hampton Research), using the mother liquor without any further cryoprotectant.

### **7.3. Data collection, structure solution and refinement**

The dataset described in this report was collected at the Diamond Light Source, Didcot, Oxfordshire, U.K. on beamline I03. Data were processed and integrated using XDS<sup>7</sup> and scaled using SCALA<sup>8</sup>



included in the Xia2 processing system<sup>9</sup>. Data collection statistics are provided in Table 7. The crystal of EneIRED-07-NADP<sup>+</sup> was obtained in space group P21212, with six molecules in the asymmetric unit; the solvent content in the crystals was 48%. The structure of EneIRED-07-NADP<sup>+</sup> was solved by molecular replacement using MOLREP<sup>10</sup> with the monomer of *R*-IRED-*Sr* (PDB code 5OCM<sup>11</sup>) as the model. The structure was built and refined using iterative cycles in Coot<sup>12</sup> and REFMAC<sup>13</sup>, employing local NCS restraints in the refinement cycles. Following building and refinement of the protein and water molecules in this complex, residual density was observed in the omit maps at the dimer interfaces, which could be clearly modelled as NADP<sup>+</sup>. The final structures exhibited %  $R_{\text{crist}}/R_{\text{free}}$  values of 26.0/30.7. Refinement statistics for the structures are presented in Table S7. The Ramachandran plot for EneIRED-07-NADP<sup>+</sup> showed 93.3% of residues to be situated in the most favoured regions, 6.0% in additional allowed and 0.7% residues in outlier regions. The structure has been deposited in the Protein Databank (PDB) with accession code 7OSN.

#### 7.4. Modelling

Automated docking was performed using AUTODOCK VINA 1.1.2<sup>14</sup>. Coordinates for the ligand were prepared using the ligand builder in COOT<sup>12</sup> with the relevant topology files generated by Lidia within the COOT program. The appropriate pdbqt files for the dimeric model of EneIRED-07 and the ligand were prepared in AUTODOCK Tools. The active site of EneIRED-07 was contained in a grid size of 12 Å × 12 Å × 12 Å (corresponding to x, y, z) with 1 Å spacing, centred around the catalytic centre at positions 9.89 Å × 47.91 Å × -41.30 Å (corresponding to x, y, z), which was generated using AutoGrid in the AUTODOCK Tools interface. The dockings were performed by VINA, therefore the posed dockings were below 2 Å r.m.s.d. The results generated by VINA were visualised in AUTODOCK Tools 1.5.6 where the ligand conformations were assessed based upon lowest VINA energy. The model that features the (*R*)-enantiomer of **3f** is illustrated in Figure S13.

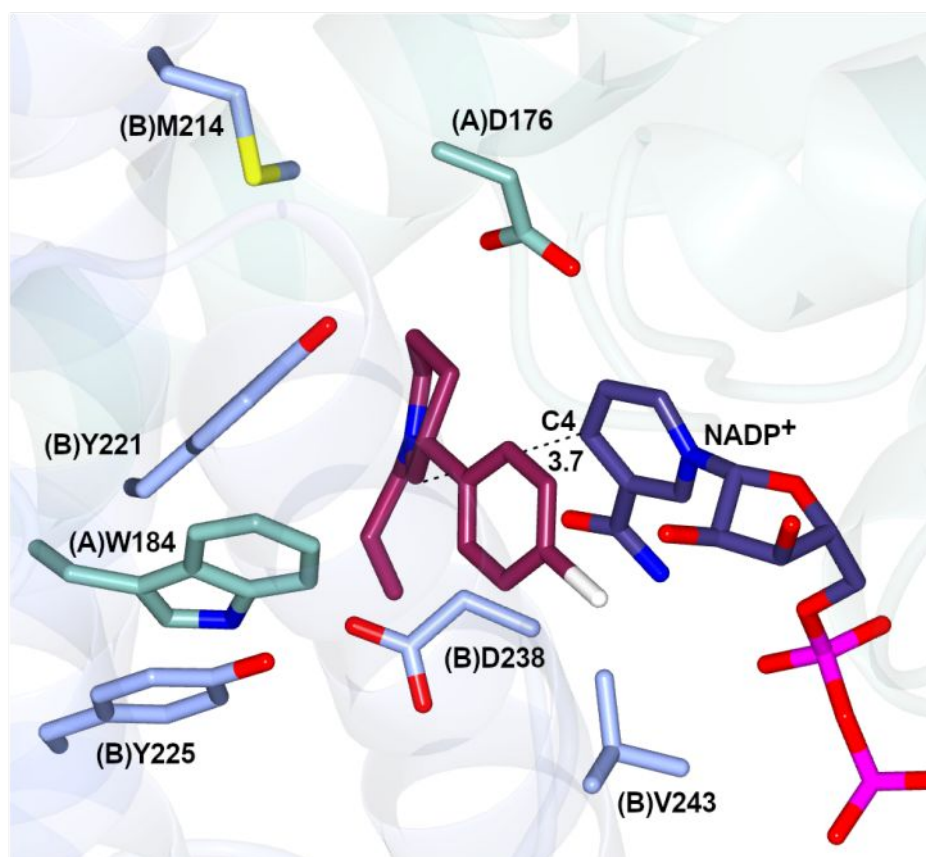

**Figure S13:** Active site of EnelRED-07 with the (*R*)-enantiomer of intermediate **3f** (where  $R^1$  = allyl and  $R^2$  = *para*-bromophenyl) modelled into the active site. NADP<sup>+</sup> and (*R*)-**3f** are shown in cylinder format with carbon atoms in grey and purple respectively.

**Table S7:** Data Collection and Refinement Statistics for EnelRED-07 in complex with NADP<sup>+</sup>

|                                         | EnelRED-07-NADP <sup>+</sup>                                                                      |
|-----------------------------------------|---------------------------------------------------------------------------------------------------|
| Beamline                                | Diamond I03                                                                                       |
| Wavelength (Å)                          | 0.97625                                                                                           |
| Resolution (Å)                          | 50.00-2.55 (2.61-2.55)                                                                            |
| Space Group                             | <i>P</i> 2 <sub>1</sub> 2 <sub>1</sub> 2                                                          |
| Unit cell (Å)                           | <i>a</i> = 50.00; <i>b</i> = 142.00; <i>c</i> = 266.00<br>$\alpha = \gamma = \beta = 90.00^\circ$ |
| No. of molecules in the asymmetric unit | 6                                                                                                 |
| Unique reflections                      | 63163 (4397)                                                                                      |
| Completeness (%)                        | 100 (100)                                                                                         |
| $R_{\text{merge}}$ (%)                  | 0.12 (0.91)                                                                                       |
| $R_{\text{p.i.m.}}$                     | 0.04 (0.26)                                                                                       |

|                                                            |             |
|------------------------------------------------------------|-------------|
| Multiplicity                                               | 12.9 (13.4) |
| $\langle I/\sigma(I) \rangle$                              | 10.2 (1.8)  |
| Overall <i>B</i> factor from Wilson plot (Å <sup>2</sup> ) | 55          |
| CC <sub>1/2</sub>                                          | 1.00 (0.97) |
| <i>R</i> <sub>cryst</sub> / <i>R</i> <sub>free</sub> (%)   | 26.0/30.7   |
| r.m.s.d 1-2 bonds (Å)                                      | 0.08        |
| r.m.s.d 1-3 angles (°)                                     | 1.55        |
| Avgc main chain B (Å <sup>2</sup> )                        | 80          |
| Avgc side chain B (Å <sup>2</sup> )                        | 81          |
| NADP <sup>+</sup> B (Å <sup>2</sup> )                      | 66          |
| Avgc water B (Å <sup>2</sup> )                             | 56          |

---

Numbers in brackets refer to data for highest resolution shells.

## 8. GCMS Analysis: methods and retention times for THP substrates and piperidine products

**Table S8:** GCMS analysis: methods and retention times of THP substrates and piperidine products from biotransformations.

| THP        | Piperidine | Column | Oven temp.      | THP retention time (min) | Piperidine retention time (min) |                |
|------------|------------|--------|-----------------|--------------------------|---------------------------------|----------------|
|            |            |        |                 |                          | T <sup>1</sup>                  | T <sup>2</sup> |
| <b>1b</b>  | <b>1c</b>  | HP-1MS | <b>Method 1</b> | 17.6                     | 16.8                            |                |
| <b>2b</b>  | <b>2c</b>  | HP-1MS | <b>Method 2</b> | 11.8                     | 11.6                            |                |
| <b>3b</b>  | <b>3c</b>  | HP-1MS | <b>Method 1</b> | 18.2                     | 17.4                            |                |
| <b>4b</b>  | <b>4c</b>  | HP-1MS | <b>Method 1</b> | 18.5                     | 17.5                            |                |
| <b>5b</b>  | <b>5c</b>  | HP-1MS | <b>Method 1</b> | 14.2                     | 13.2                            |                |
| <b>6b</b>  | <b>6c</b>  | HP-1MS | <b>Method 1</b> | 14.1                     | 13.2                            |                |
| <b>7b</b>  | <b>7c</b>  | HP-1MS | <b>Method 1</b> | 17.1                     | 16.1                            |                |
| <b>8b</b>  | <b>8c</b>  | HP-1MS | <b>Method 1</b> | 12.3                     | 10.9                            |                |
| <b>9b</b>  | <b>9c</b>  | HP-1MS | <b>Method 1</b> | 14.4                     | 13.1                            |                |
| <b>10b</b> | <b>10c</b> | HP-1MS | <b>Method 1</b> | 20.1                     | 19.2                            |                |
| <b>11b</b> | <b>11c</b> | HP-1MS | <b>Method 1</b> | 13.2                     | 12.1                            |                |
| <b>12b</b> | <b>12c</b> | HP-1MS | <b>Method 1</b> | 15.6                     | 14.6                            |                |
| <b>13b</b> | <b>13c</b> | HP-1MS | <b>Method 1</b> | 5.7                      | 4.8                             |                |
| <b>14b</b> | <b>14c</b> | HP-1MS | <b>Method 1</b> | 13.2                     | 12.5                            |                |
| <b>15b</b> | <b>15c</b> | HP-1MS | <b>Method 1</b> | 5.7                      | 4.8                             |                |
| <b>16b</b> | <b>16c</b> | HP-1MS | <b>Method 1</b> | 14.5                     | 13.4                            |                |
| <b>17b</b> | <b>17c</b> | HP-1MS | <b>Method 1</b> | 7.2                      | 6.0                             | 6.1            |
| <b>18b</b> | <b>18c</b> | HP-1MS | <b>Method 1</b> | 11.1                     | 9.9                             | 10.1           |
| <b>19b</b> | <b>19c</b> | HP-1MS | <b>Method 1</b> | 13.9                     | 13.4                            | 13.7           |
| <b>20b</b> | <b>20c</b> | HP-1MS | <b>Method 1</b> | 14.8                     | 14.3                            | 14.6           |
| <b>21b</b> | <b>21c</b> | HP-1MS | <b>Method 1</b> | 15.0                     | 14.4                            | 14.8           |

Injector temperature: 200 °C, detector temperature: 270 °C, helium flow: 1.2 mL/min. **Method 1:** Hold 50 °C for 2 mins, 50 – 300 °C, 10 °C/min, hold 300 °C for 1 min; **Method 2:** Hold 50 °C for 1 min, 50 – 70 °C, 7 °C/min, 70 – 270 °C, 30 °C/min, 270 – 320 °C, 40 °C/min, hold 320 °C for 2 mins.

**Table S9:** GCMS analysis: methods and retention times of piperidine products from biotransformations.

| Piperidine product       | Column | Oven temp.      | Piperidine retention time (min) |
|--------------------------|--------|-----------------|---------------------------------|
| <b>22</b>                | HP-1MS | <b>Method 1</b> | 17.3                            |
| <b>26</b>                | HP-1MS | <b>Method 1</b> | 15.8                            |
| <b>23</b>                | HP-1MS | <b>Method 1</b> | 20.3                            |
| <b>27</b>                | HP-1MS | <b>Method 2</b> | 8.8                             |
| <b>24</b>                | HP-1MS | <b>Method 2</b> | 10.4                            |
| <b>10c-d<sub>1</sub></b> | HP-1MS | <b>Method 1</b> | 19.1                            |
| <b>10c-d<sub>2</sub></b> | HP-1MS | <b>Method 1</b> | 19.0                            |

Injector temperature: 200 °C, detector temperature: 270 °C, helium flow: 1.2 mL/min.

**Method 1:** Hold 50 °C for 2 mins, 50 – 300 °C, 10°C/min, hold 300 °C for 1 min;

**Method 2:** Hold 50 °C for 1 min, 50 - 70 °C, 7 °C/min, 70 – 270 °C, 30 °C/min, 270 – 320 °C, 40 °C/min, hold 320 °C for 2 mins.

**Table S10:** GCMS analysis: methods and retention times of piperidine products from biotransformations.

| Other       | Column | Oven temp.      | retention time (min) |
|-------------|--------|-----------------|----------------------|
| THP-25      | HP-1MS | <b>Method 1</b> | 9.4                  |
| Enamine-10e | HP-1MS | <b>Method 1</b> | 21.0                 |

Injector temperature: 200 °C, detector temperature: 270 °C, helium flow: 1.2 mL min<sup>-1</sup>.

**Method 1:** Hold 50 °C for 2 mins, 50 – 300 °C, 10 °C/min, hold 300 °C for 1 min.

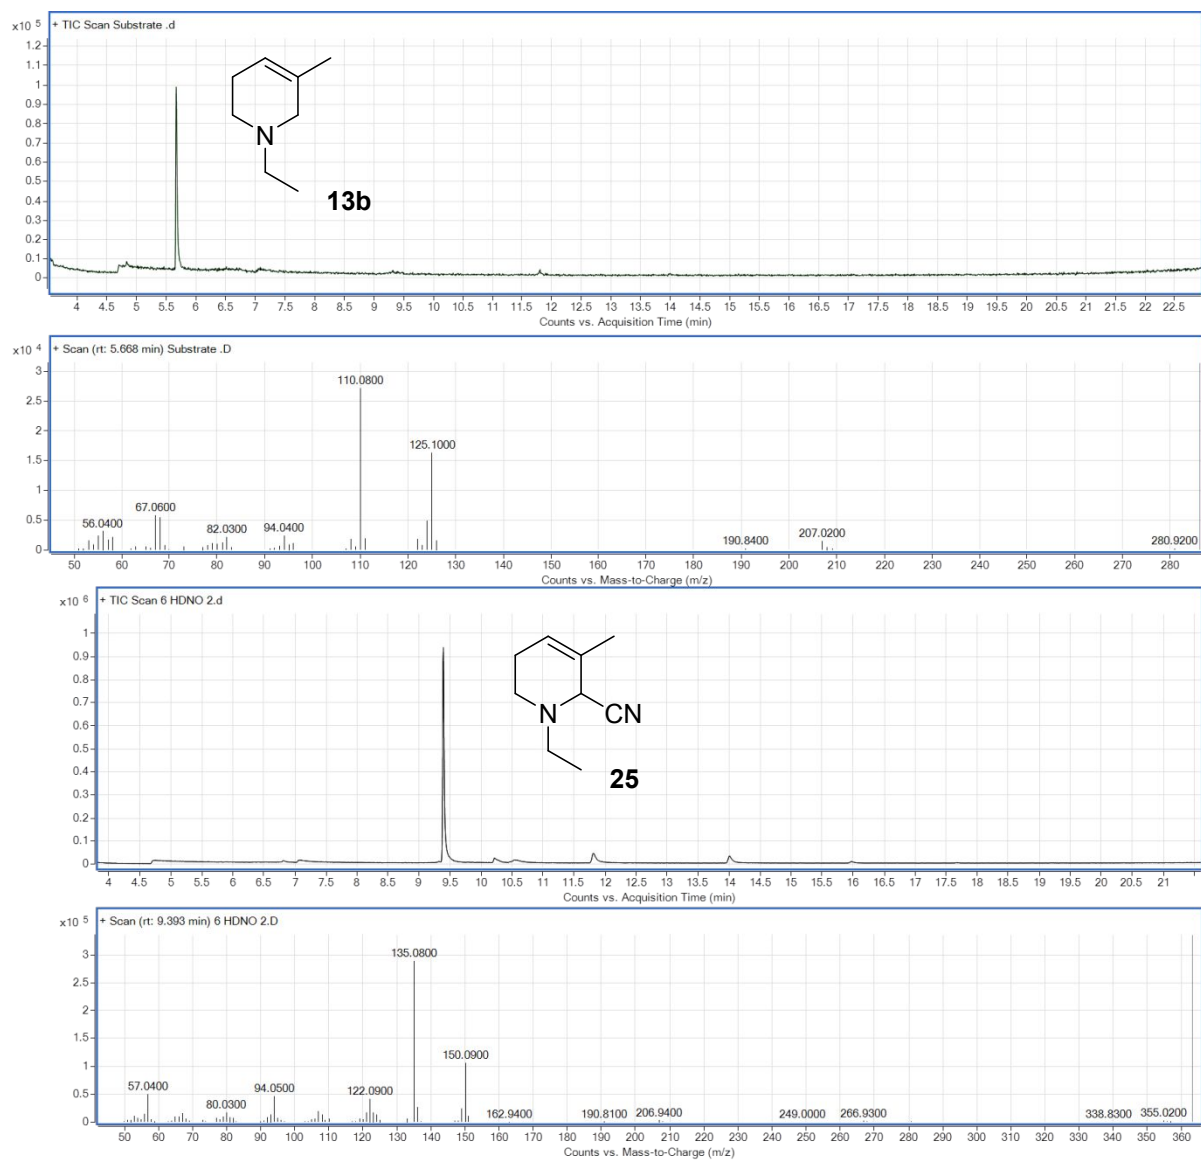

Figure S14: GC-MS spectra for THP-25.

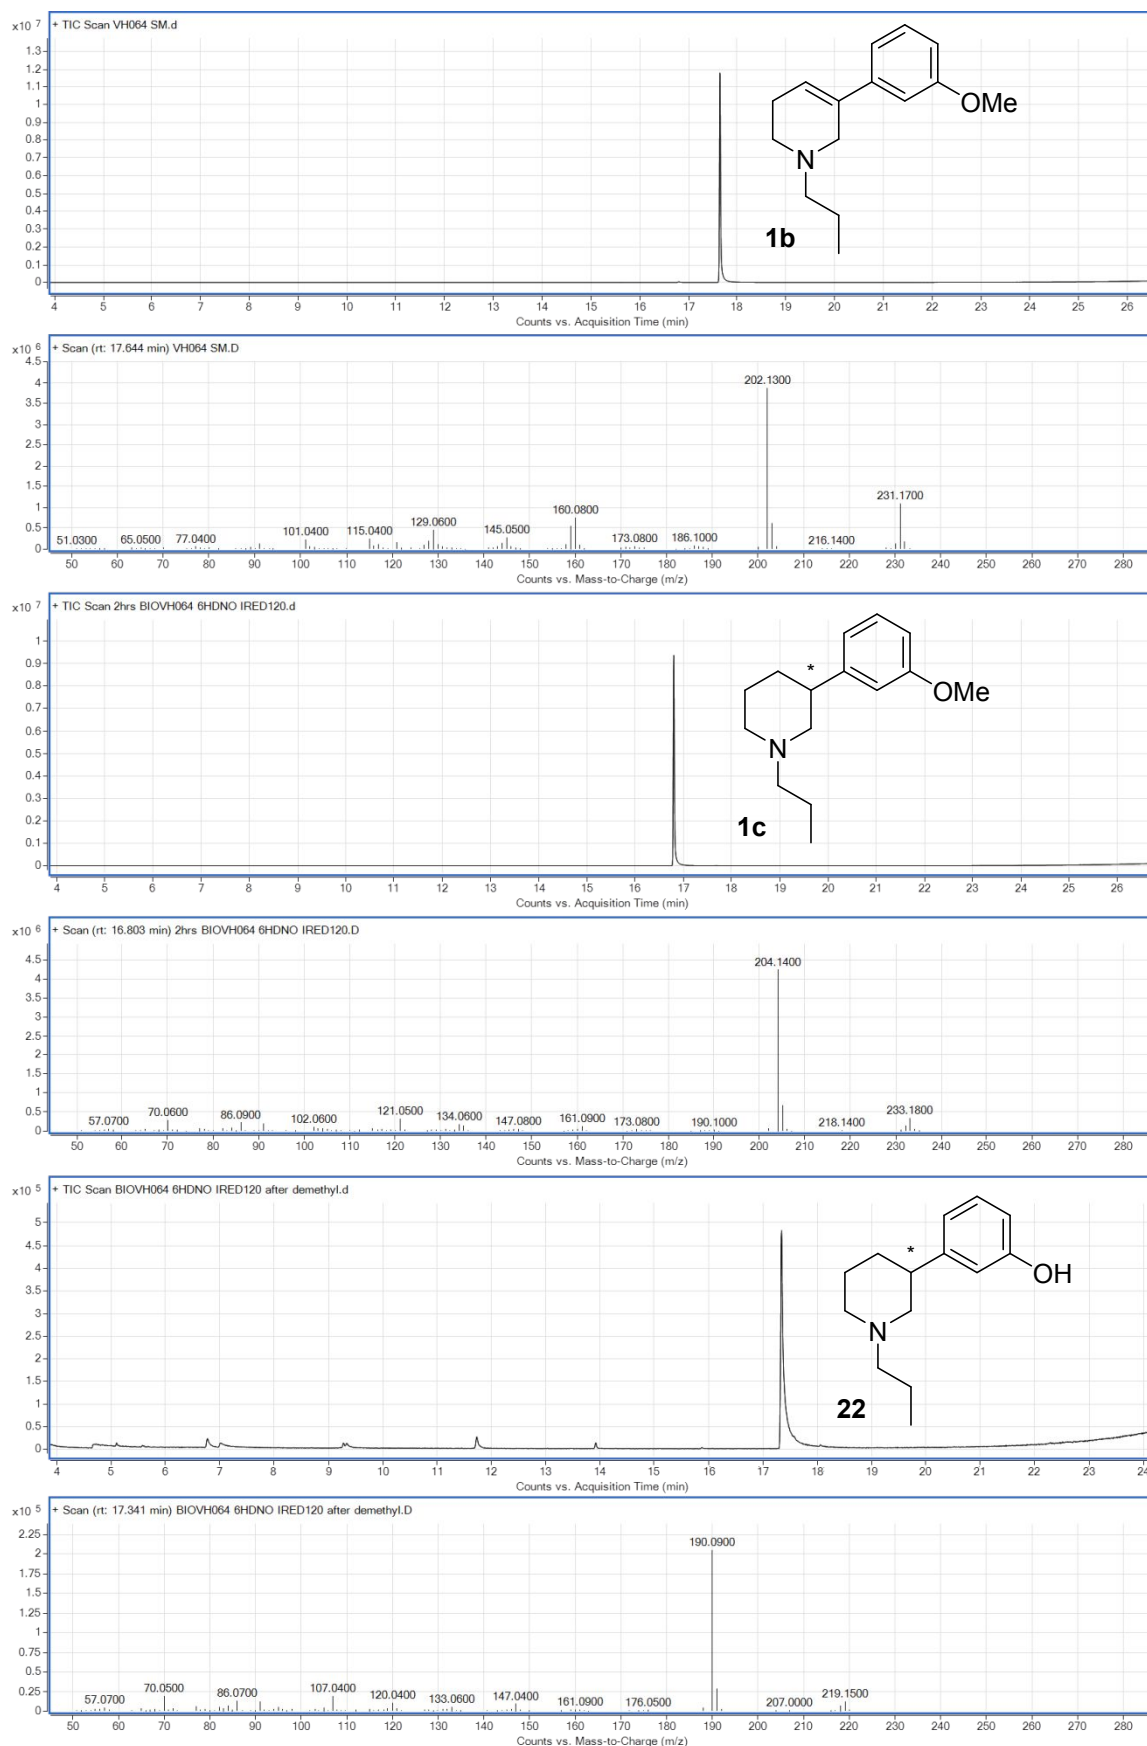

**Figure S15:** GC-MS spectra for piperidine **1c** and **22**.



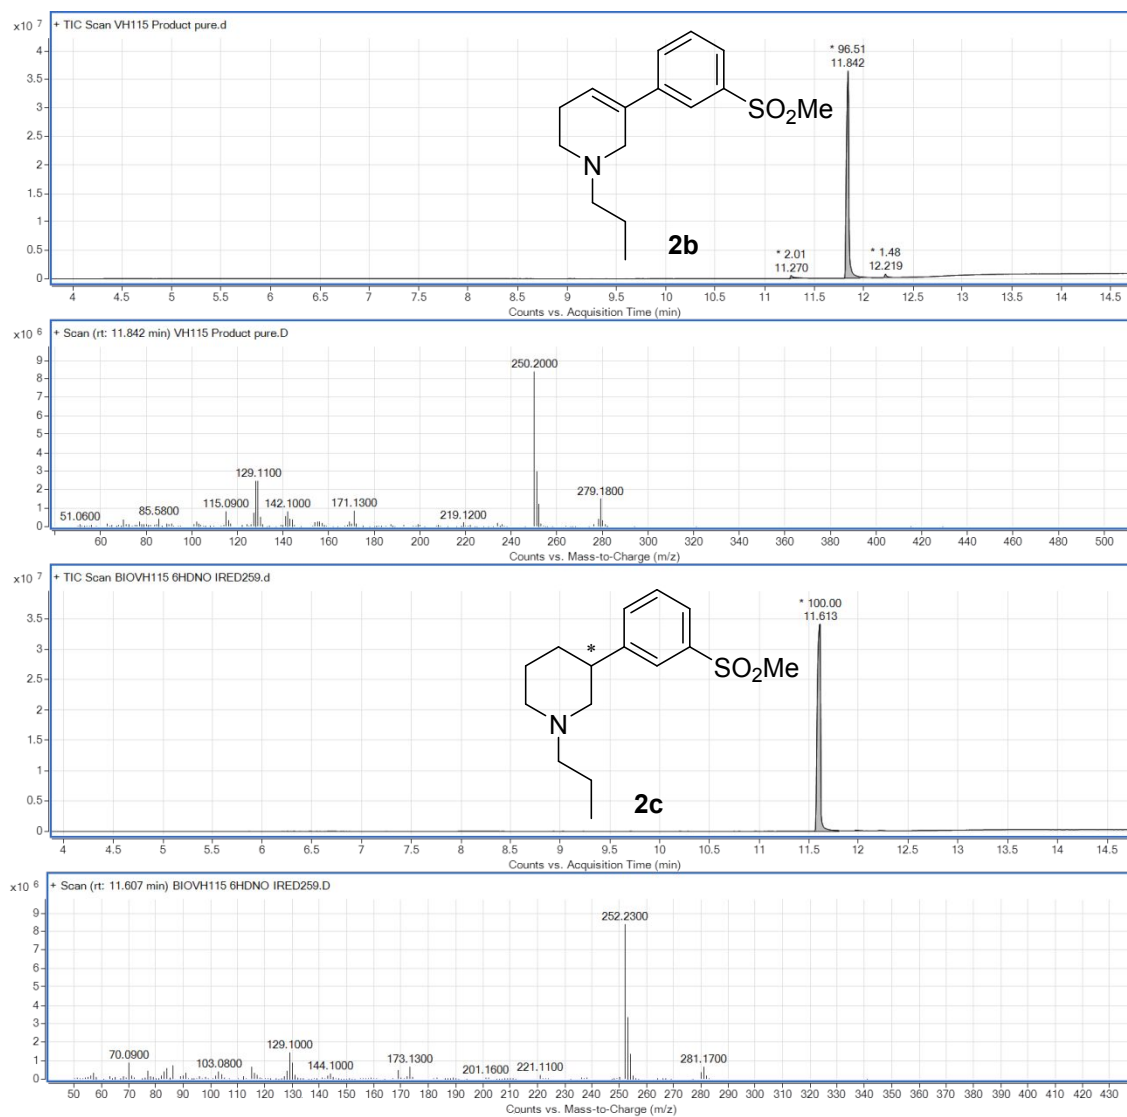

Figure S16: GC-MS spectra for piperidine 2c.

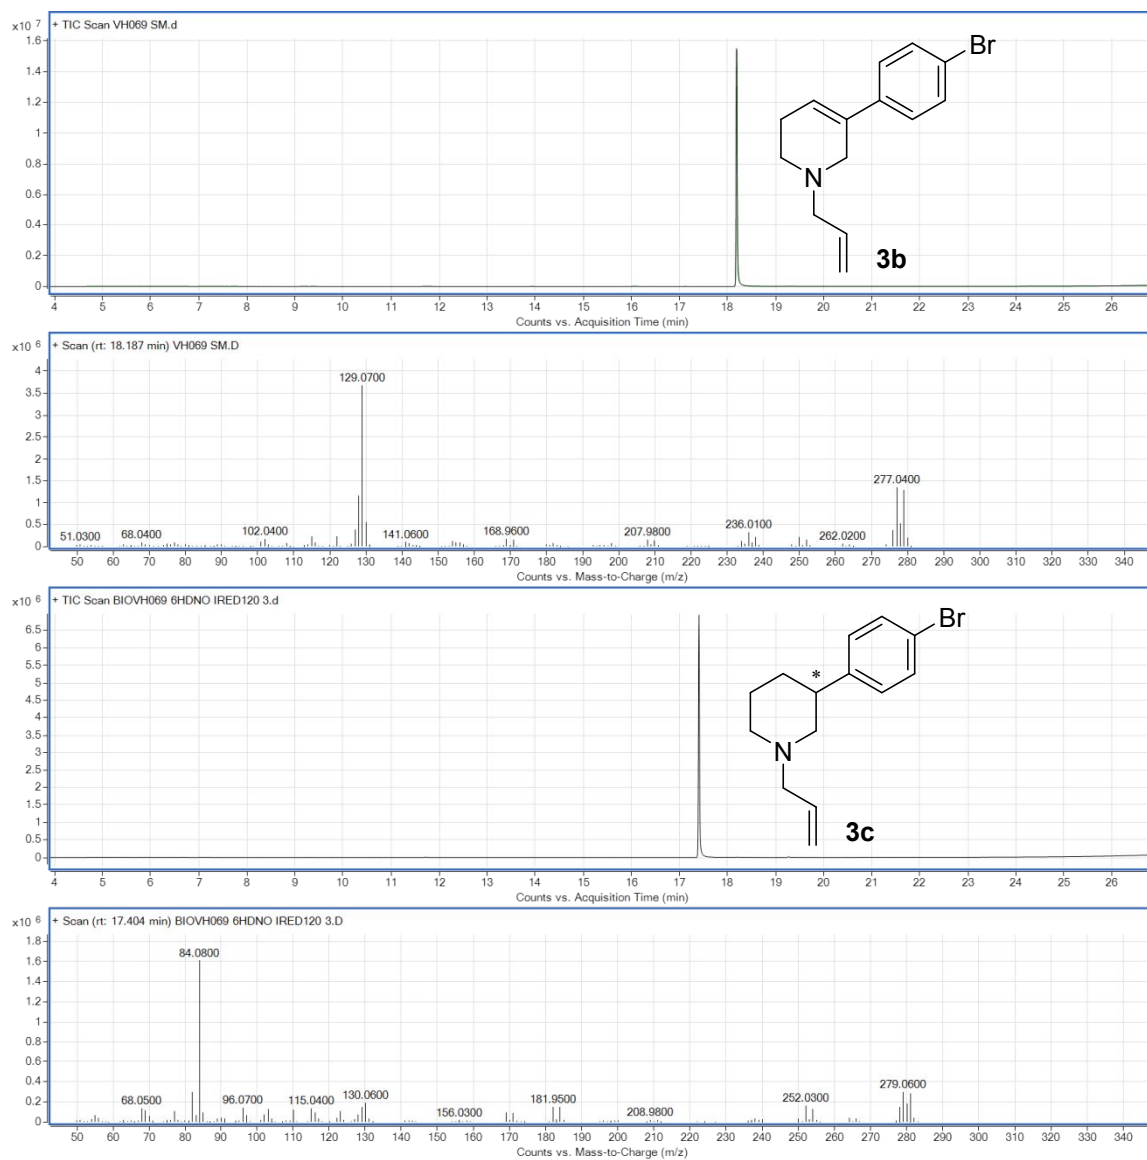

Figure S17: GC-MS spectra for piperidine **3c**.

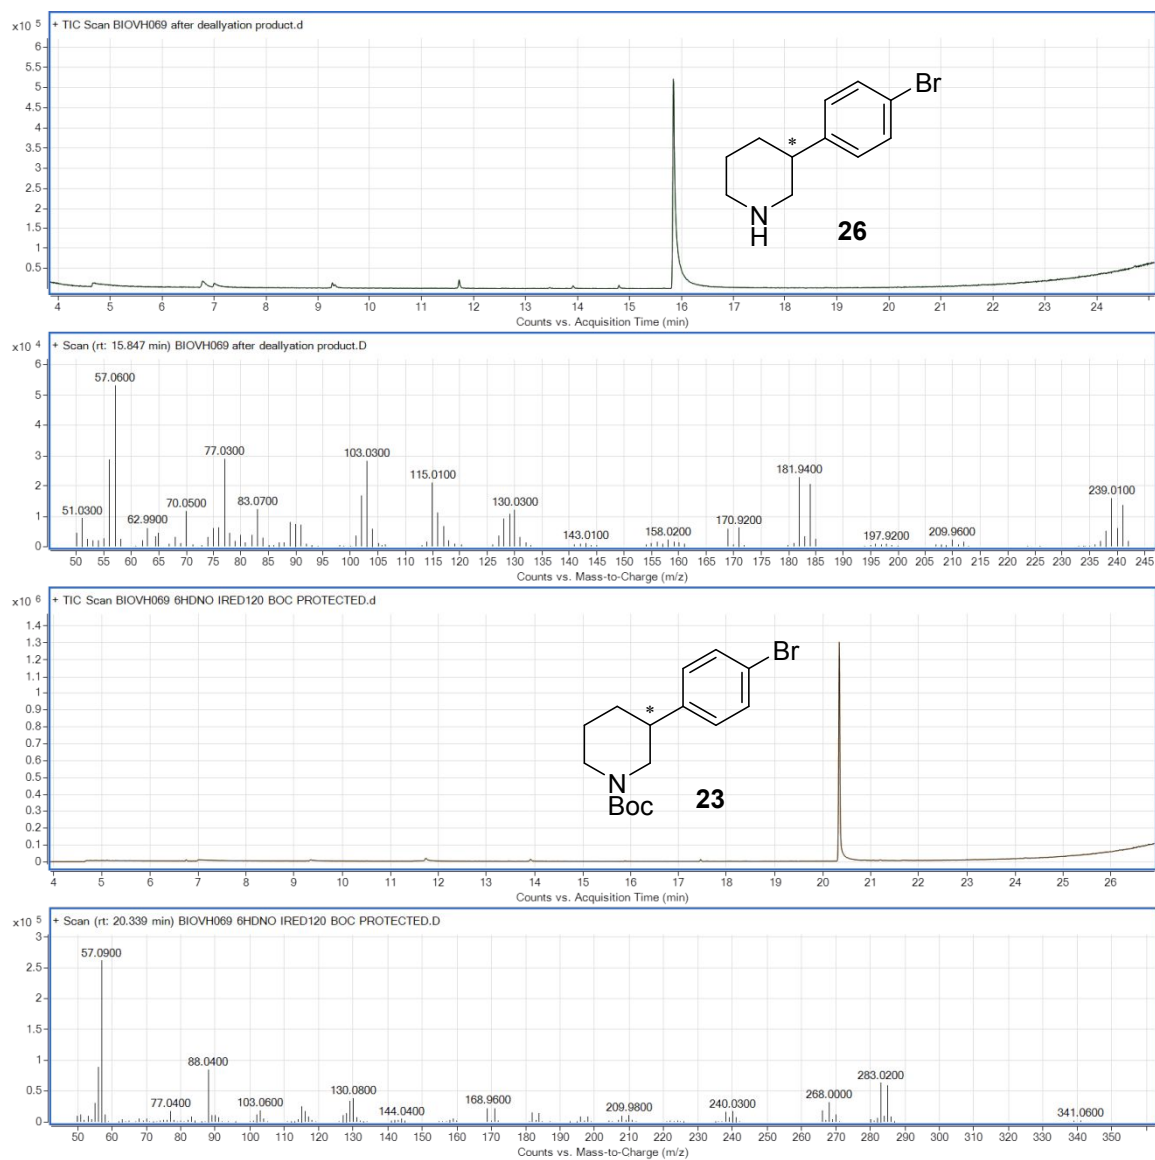

Figure S18: GC-MS spectra for piperidine **26** and **23**.

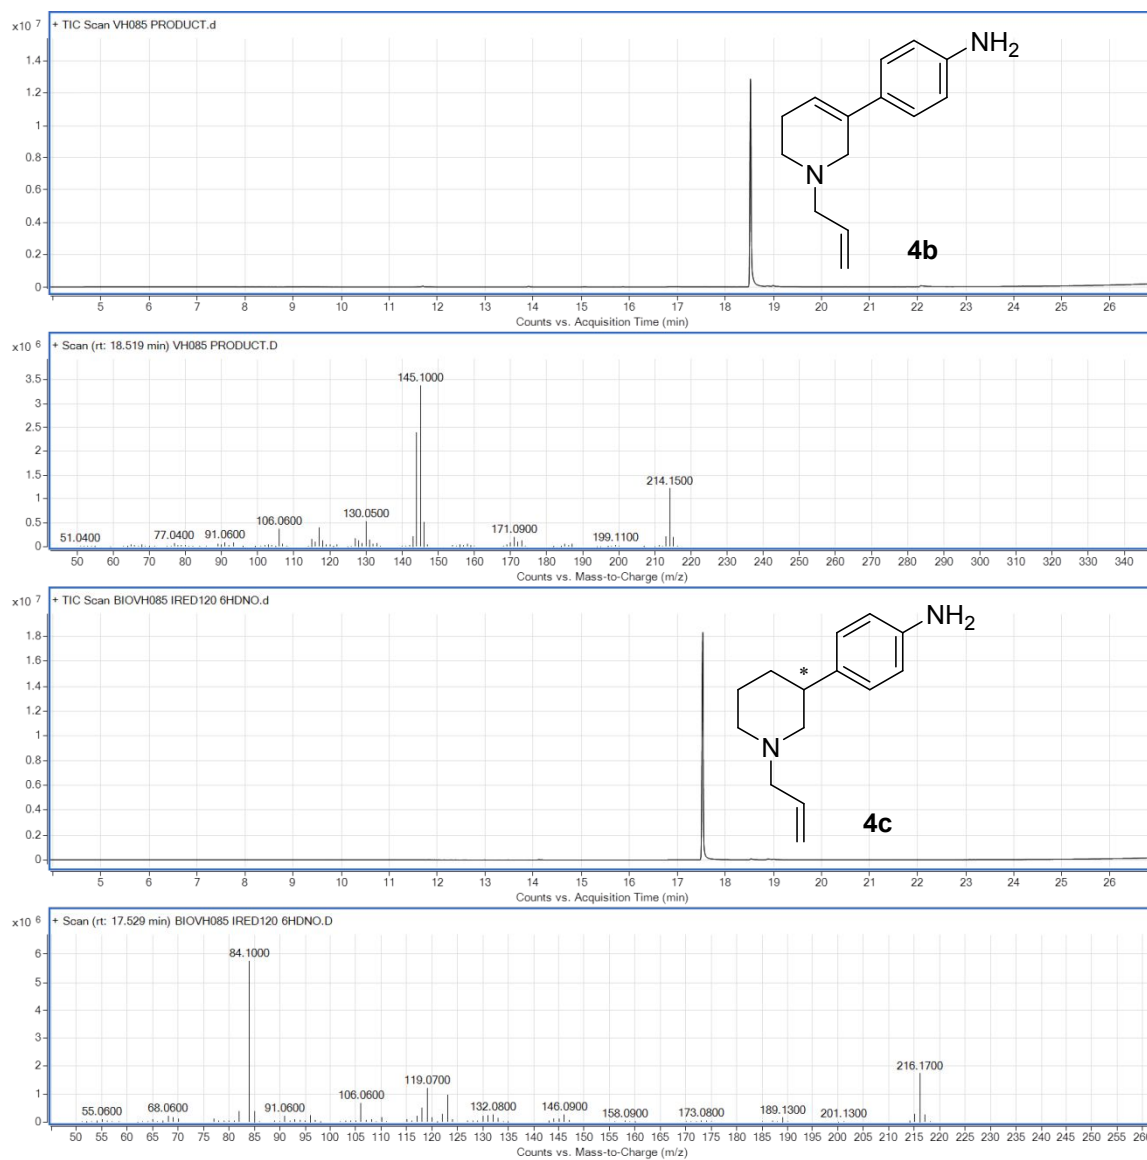

Figure S19: GC-MS spectra for piperidine **4c**.

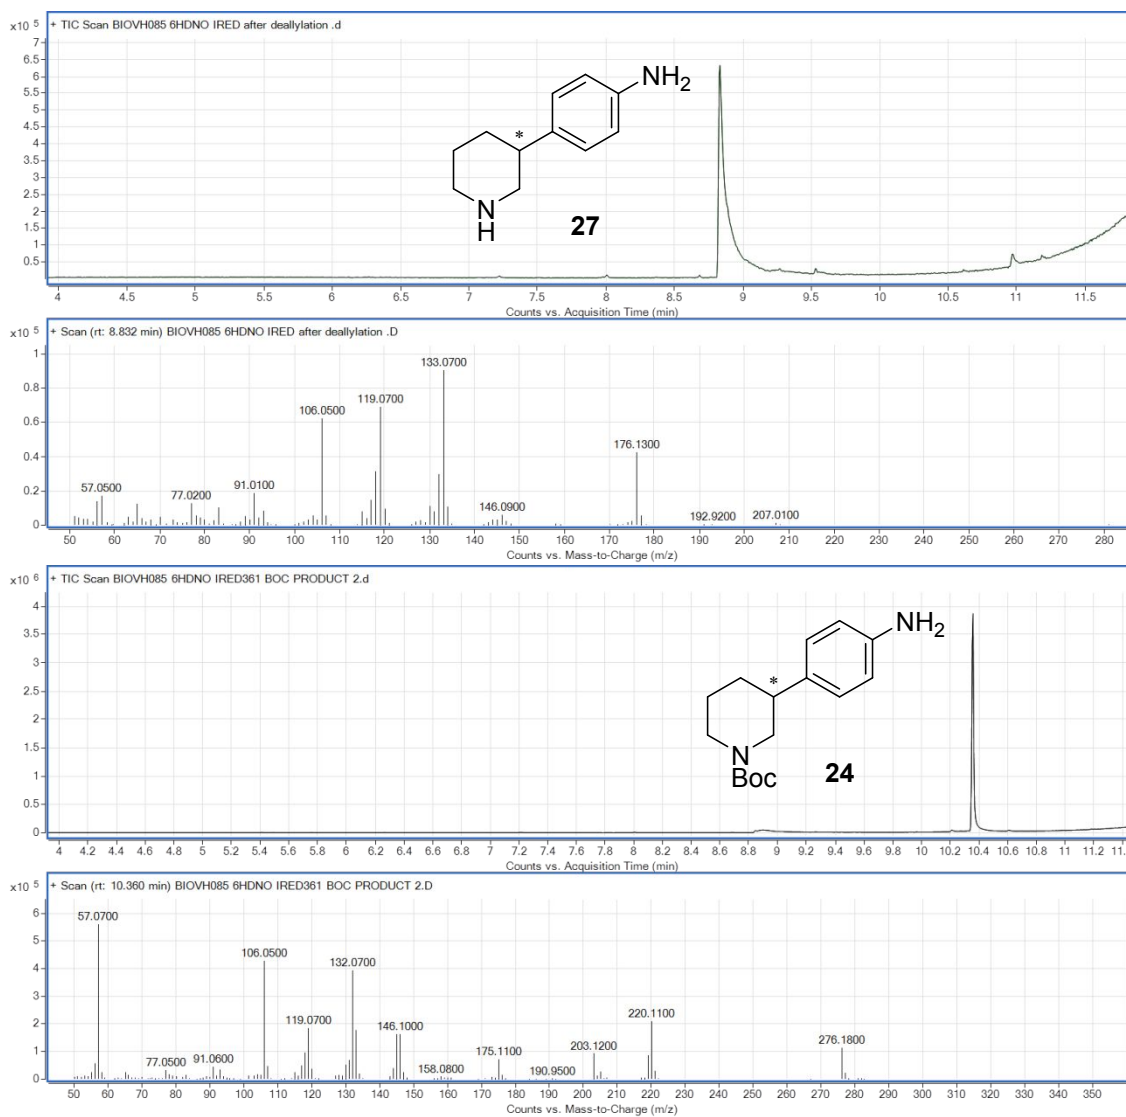

Figure S20: GC-MS spectra for piperidine **27** and **24**.

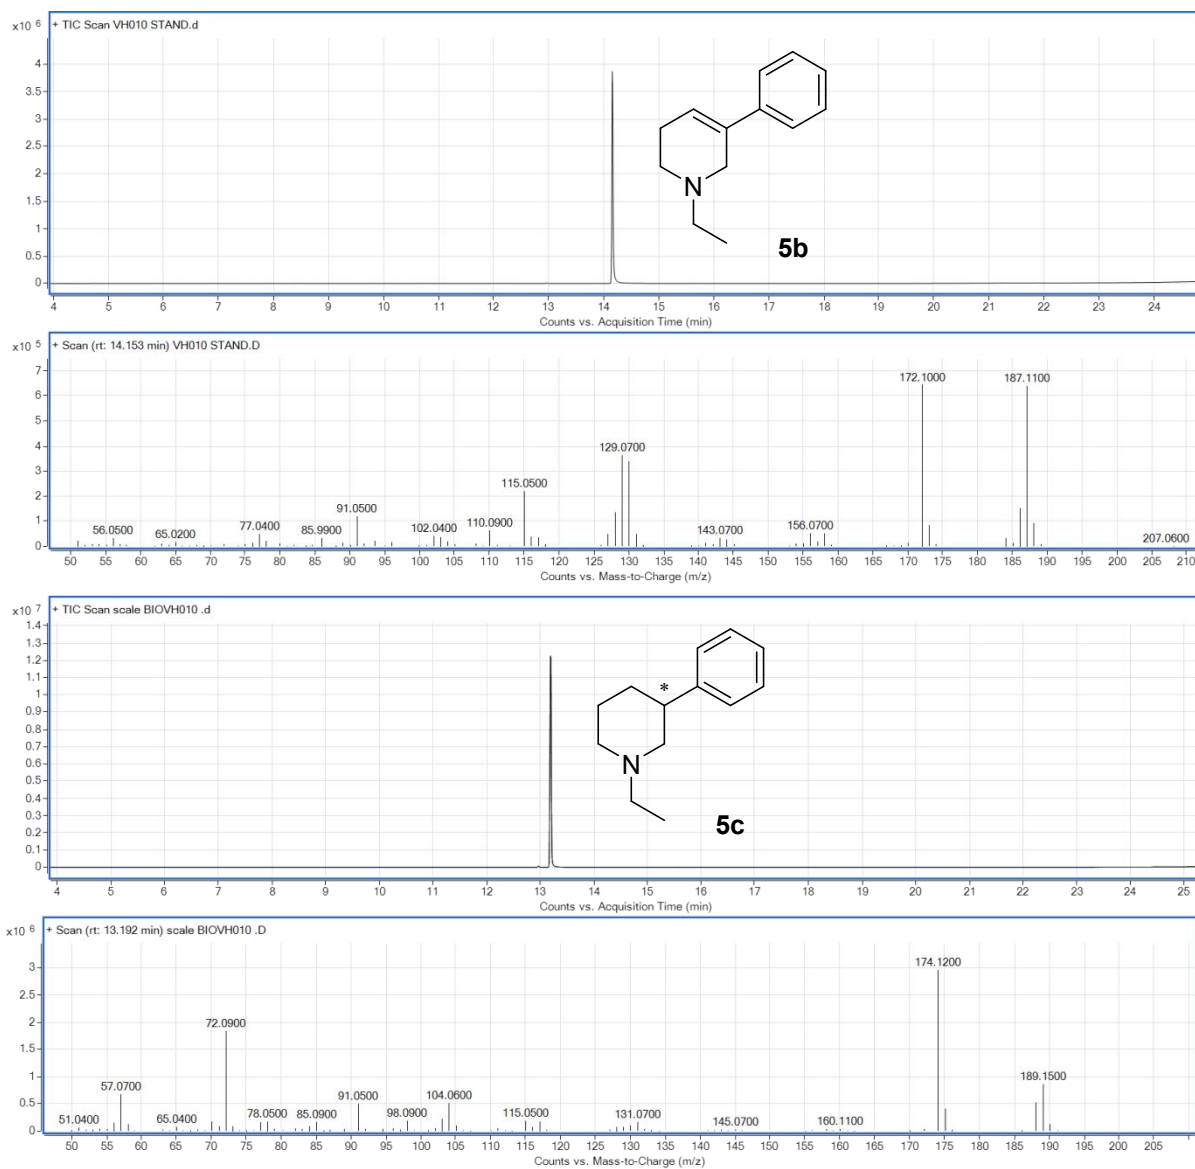

**Figure S21:** GC-MS spectra for piperidine **5c**.

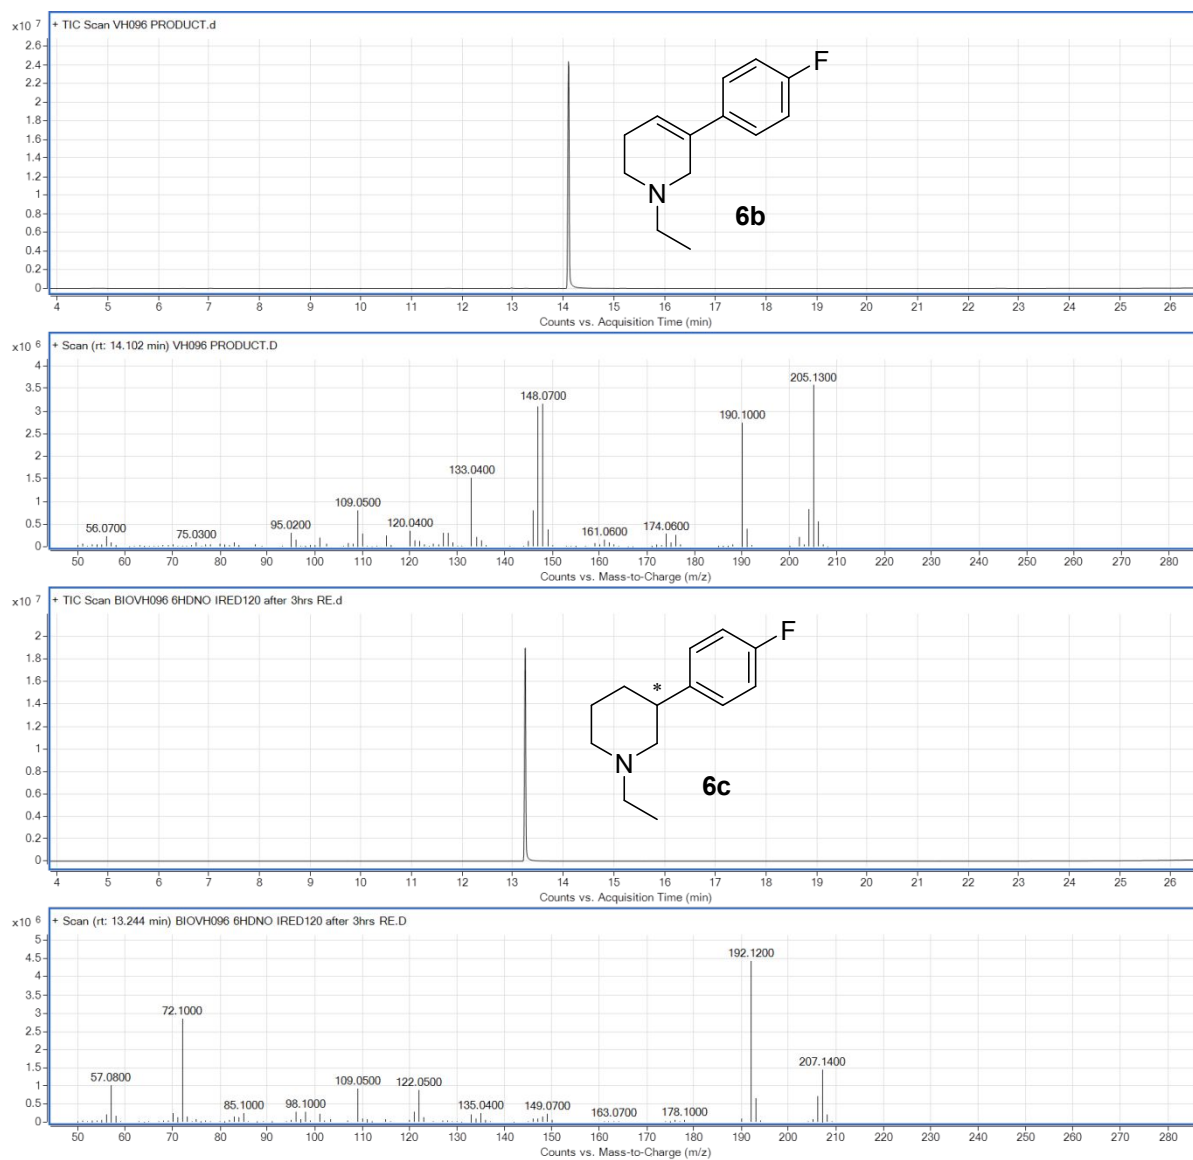

Figure S22: GC-MS spectra for piperidine **6c**.

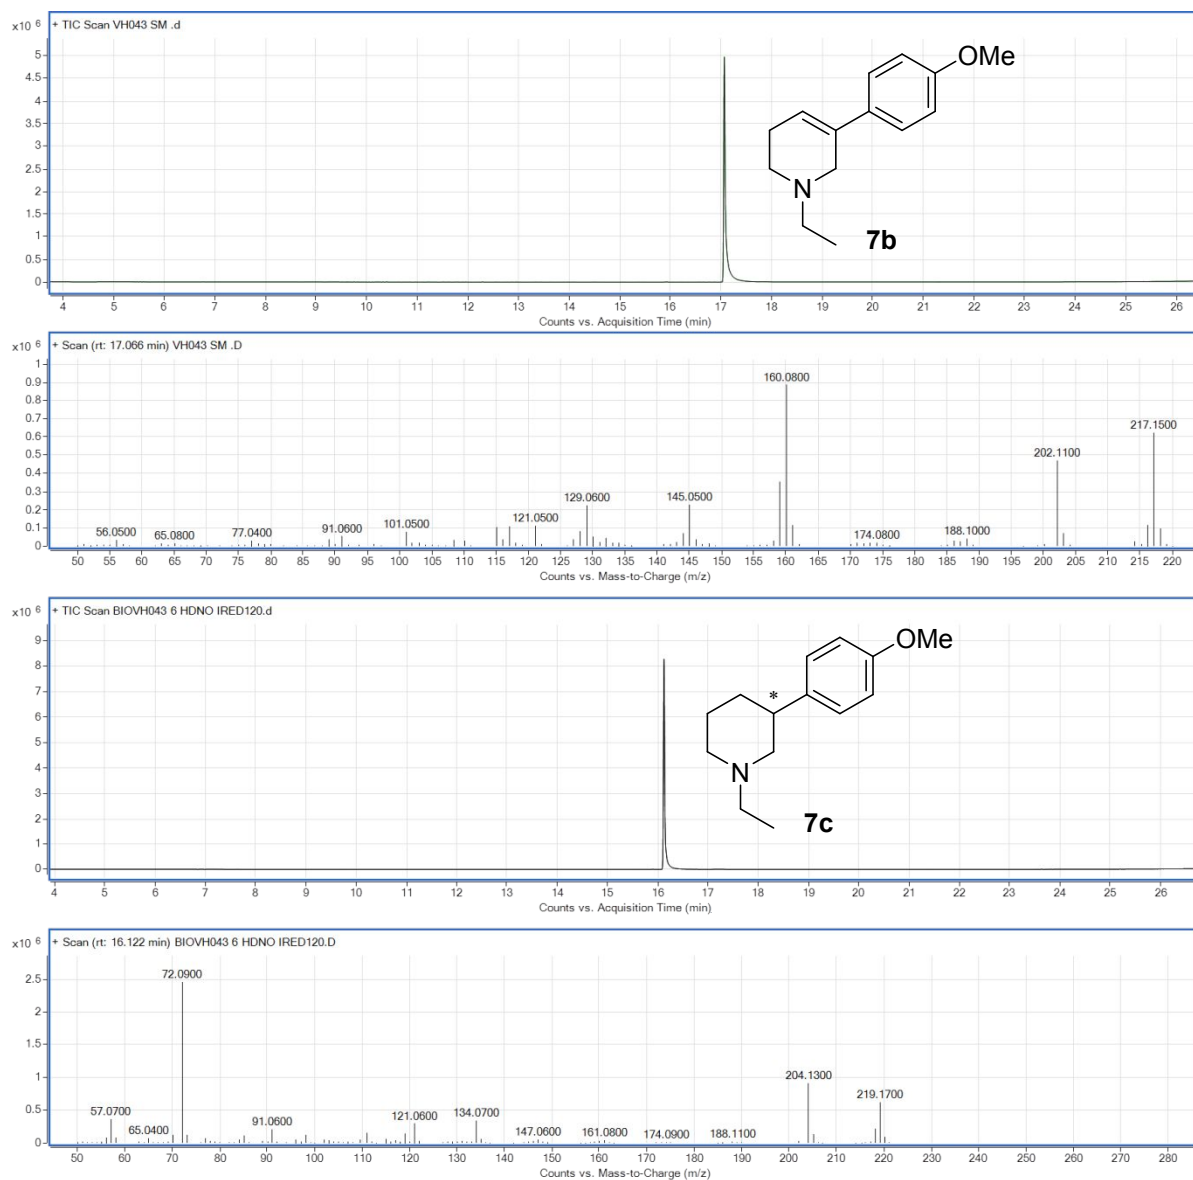

Figure S23: GC-MS spectra for piperidine 7c.



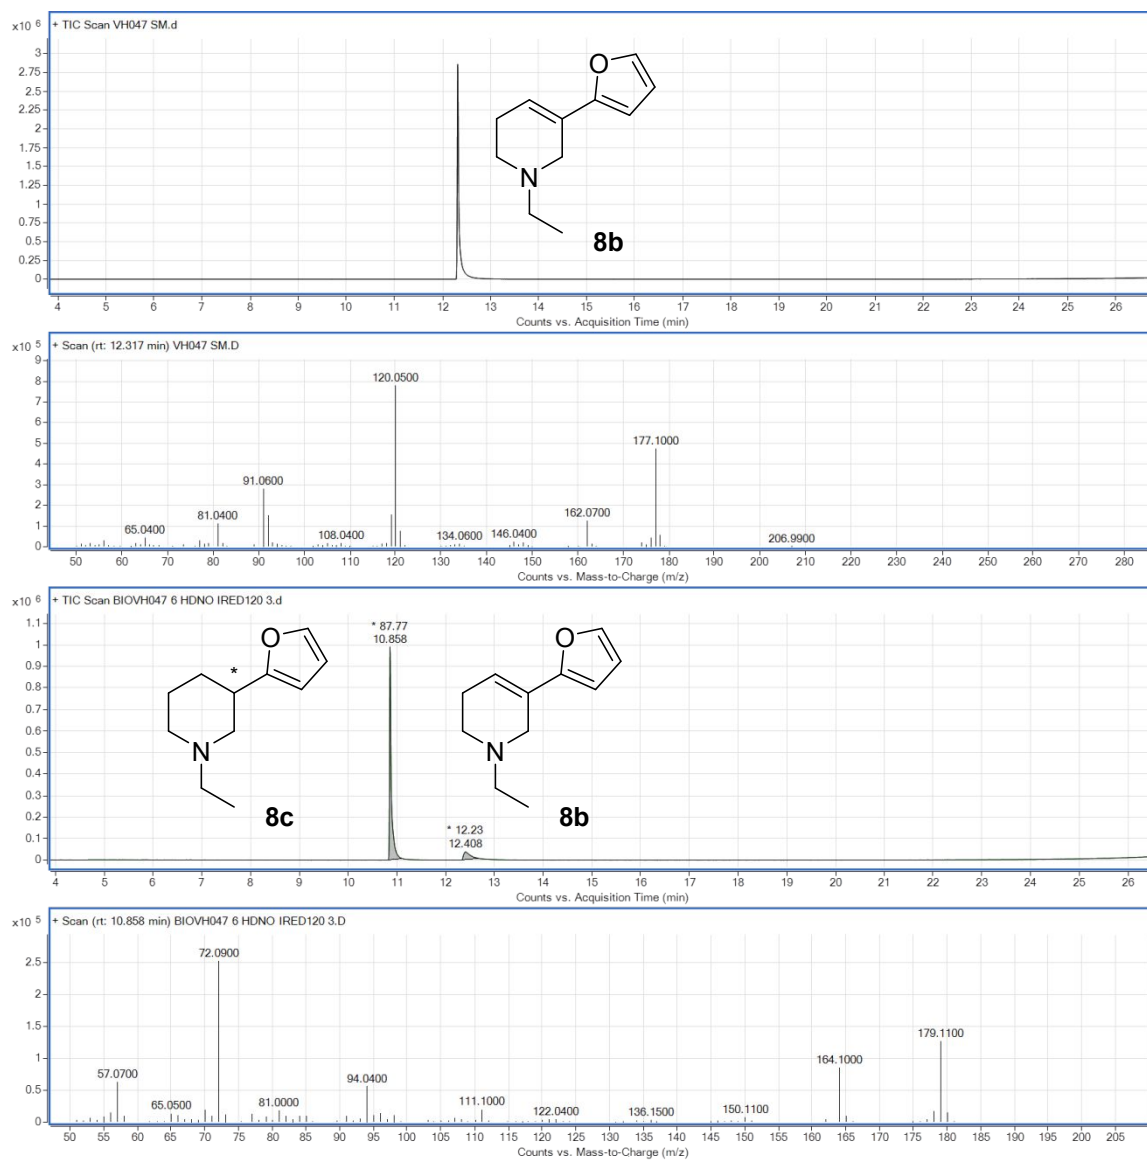

**Figure S24:** GC-MS spectra for piperidine **8c**.

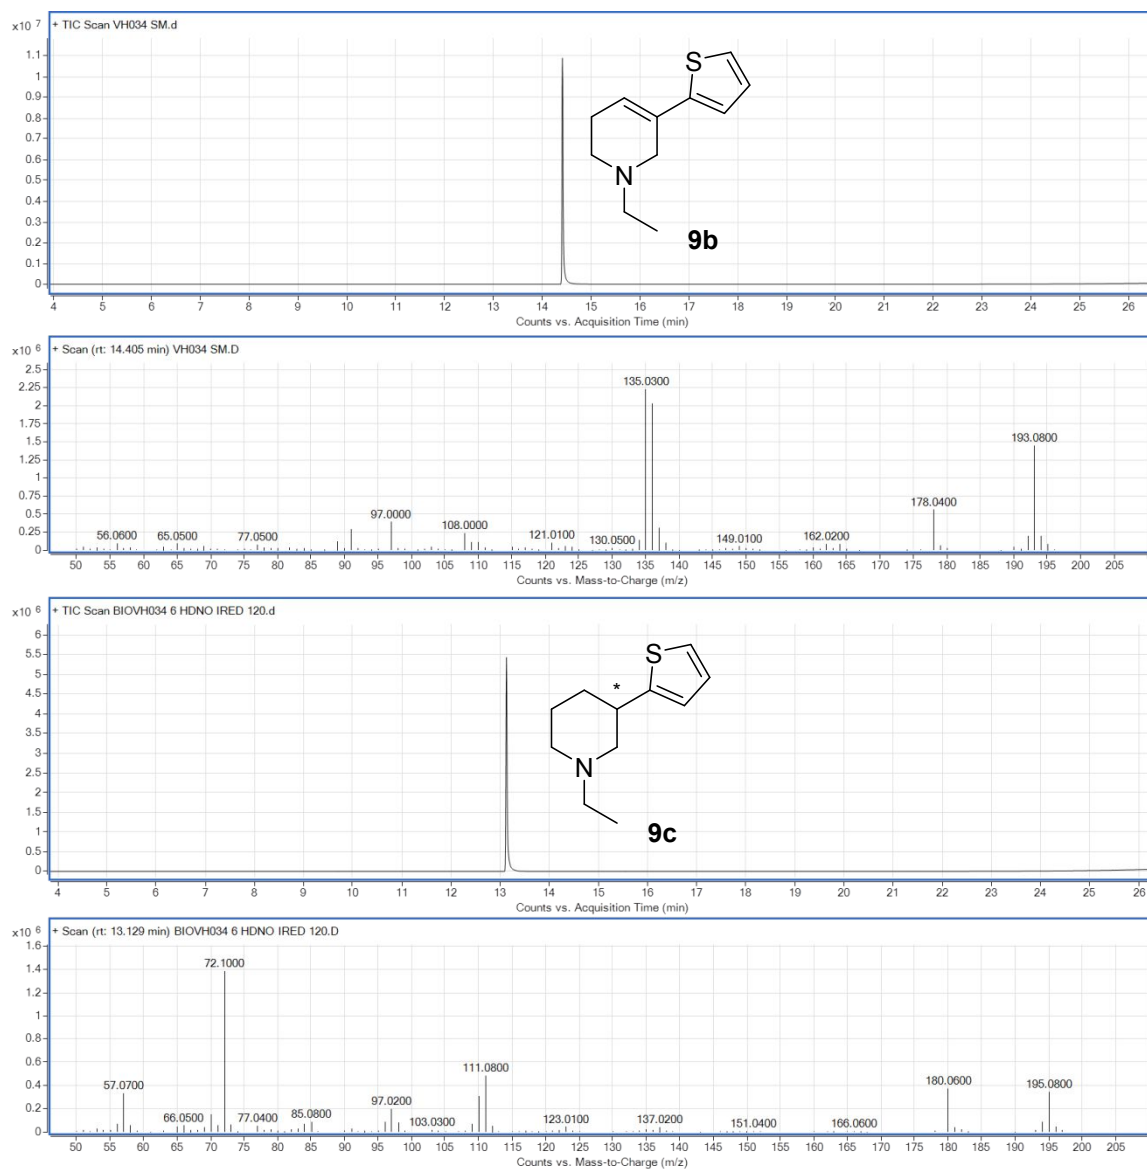

Figure S25: GC-MS spectra for piperidine **9c**.

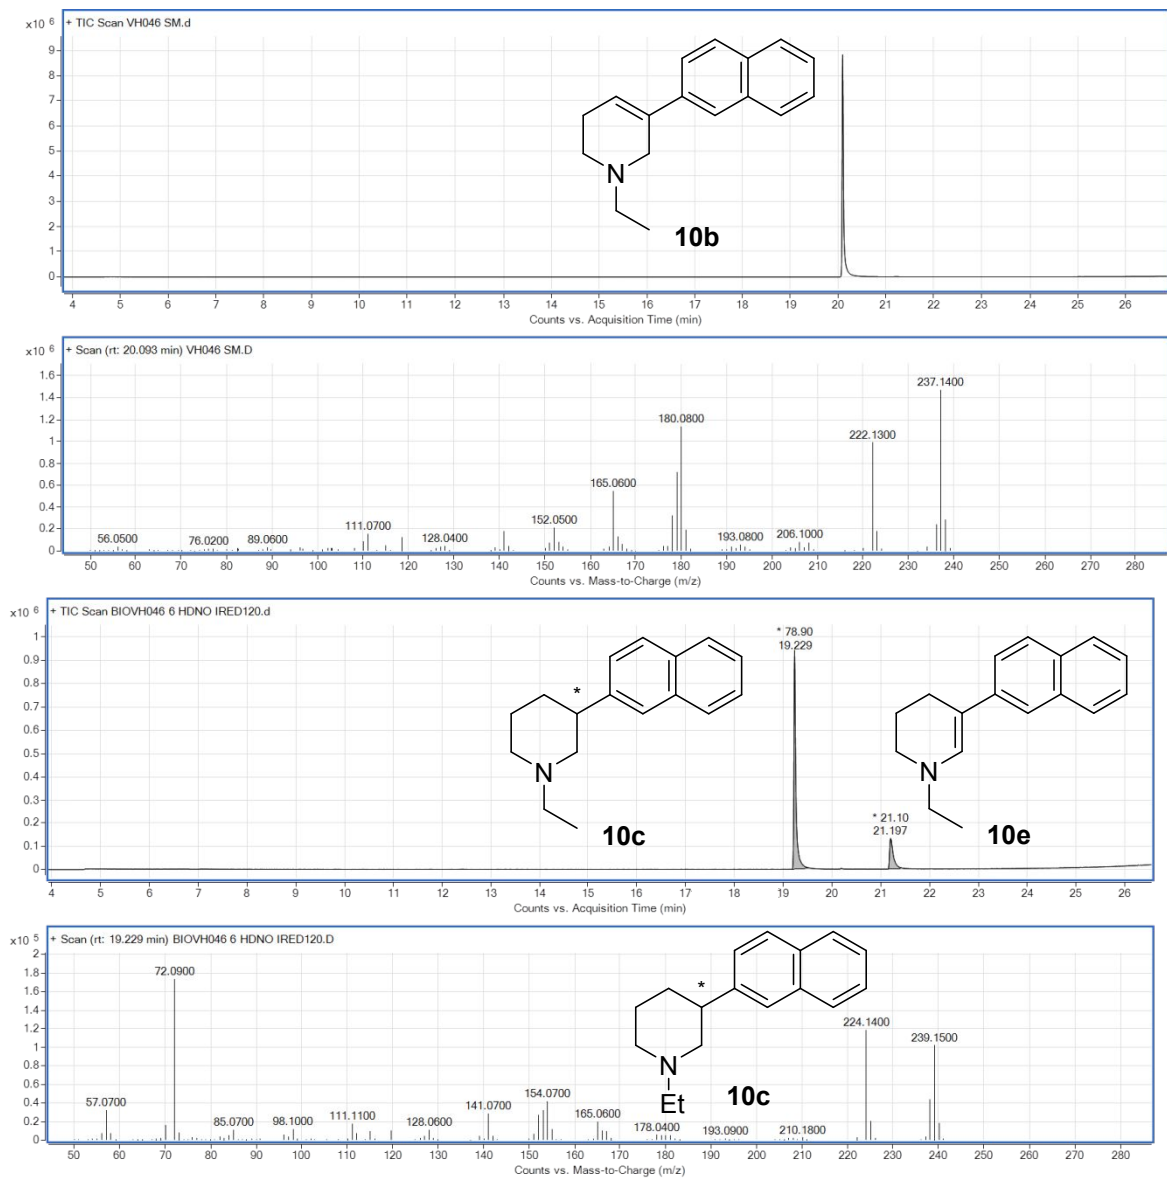

Figure S26: GC-MS spectra for piperidine **10c**.

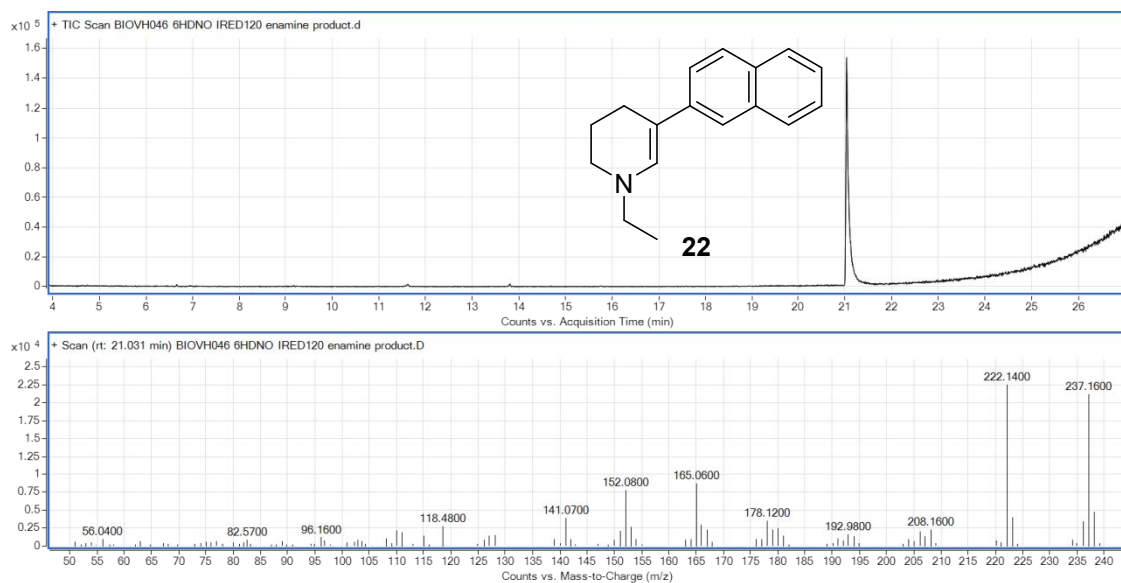

Figure S27: GC-MS spectra for enamine **22**.

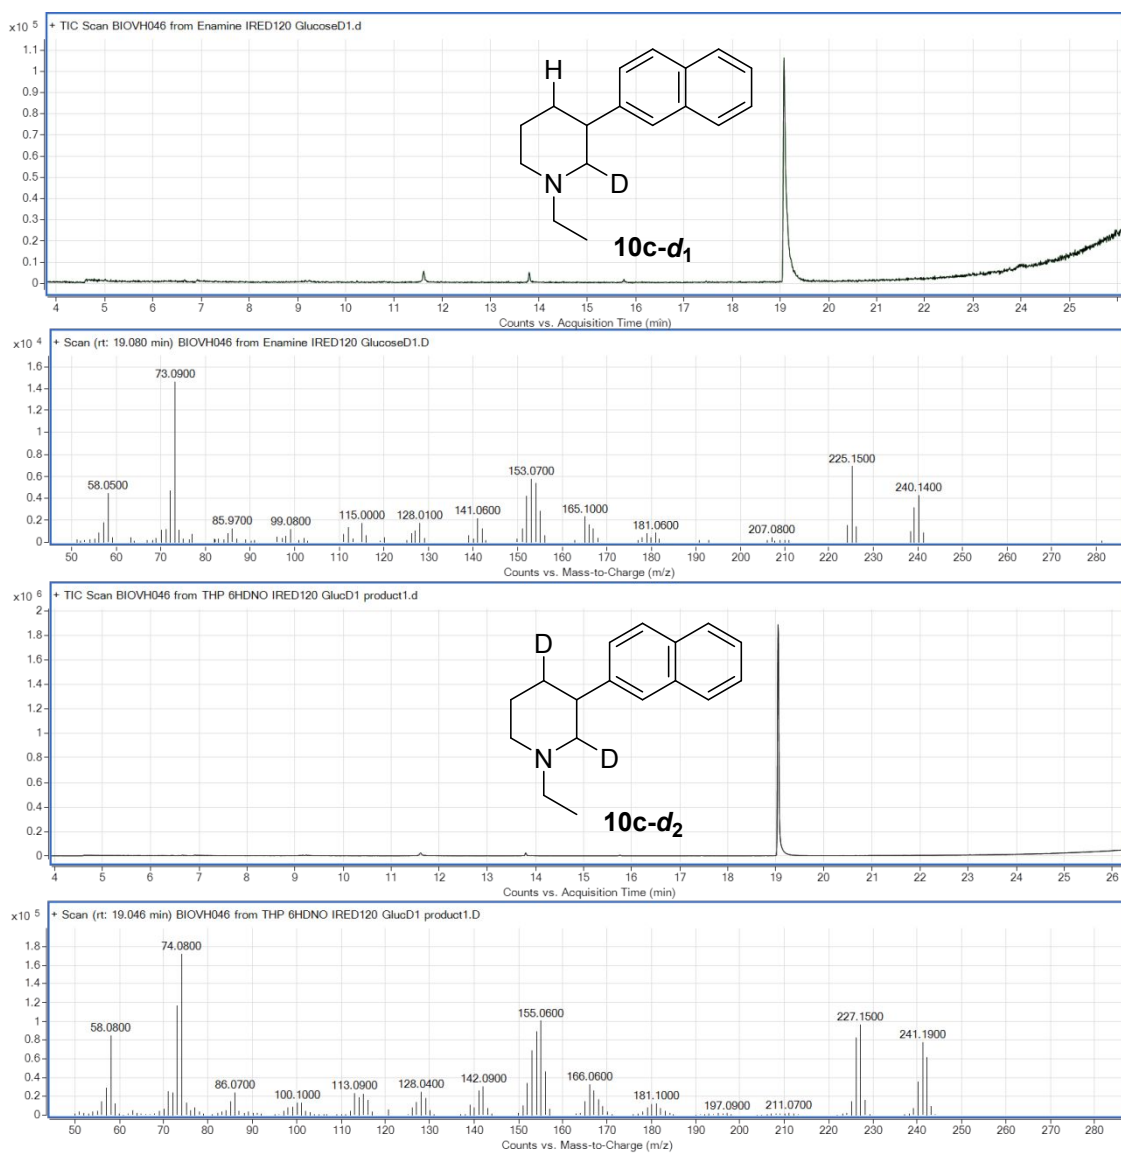

Figure S28: GC-MS spectra for piperidine **10c-d<sub>1</sub>** and **10c-d<sub>2</sub>**.

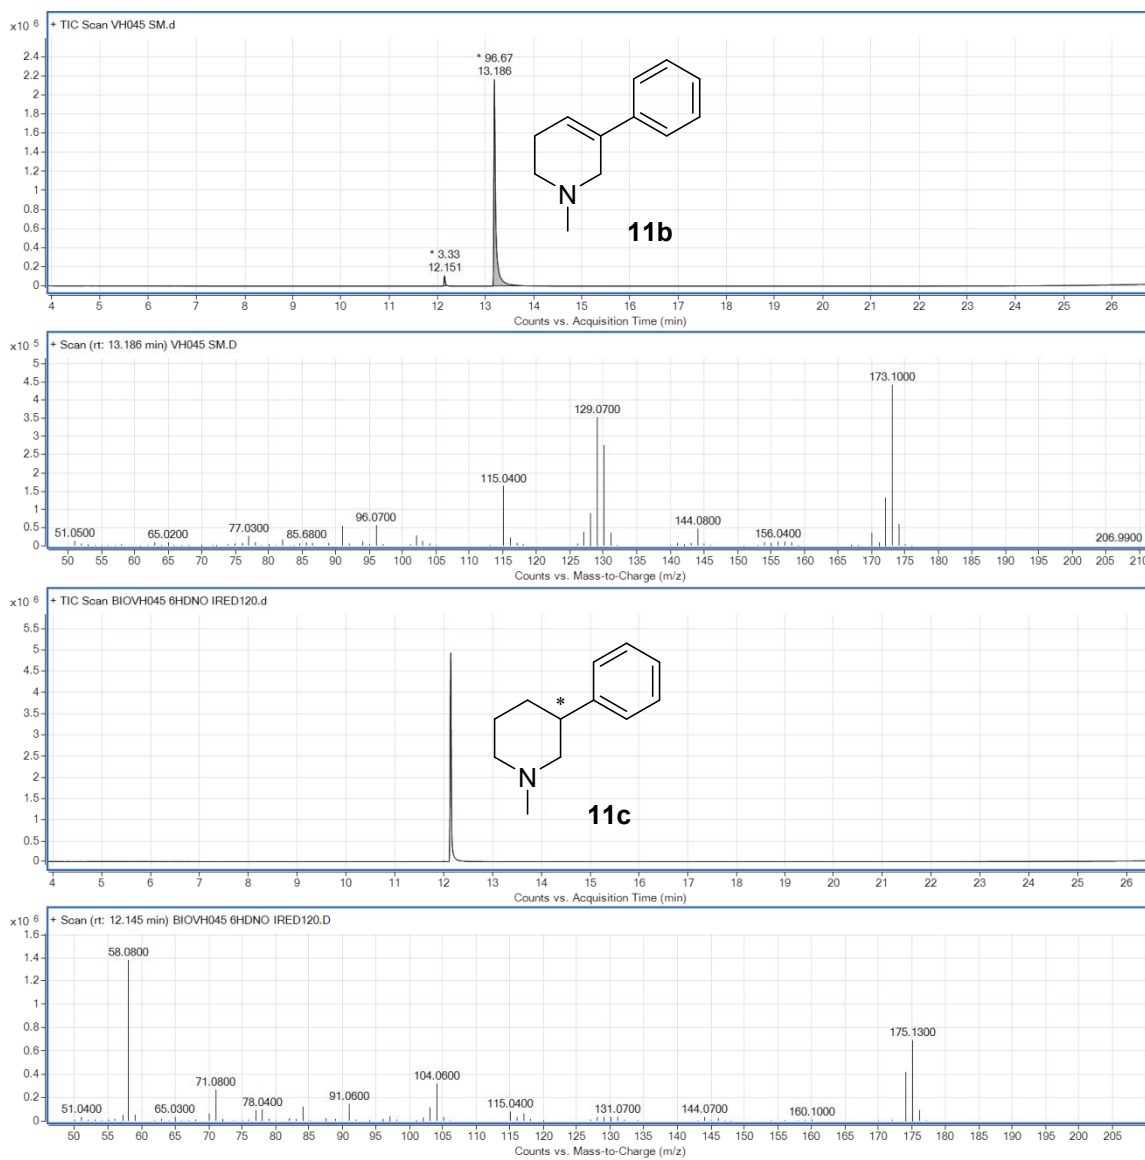

**Figure S29:** GC-MS spectra for piperidine **11c**.

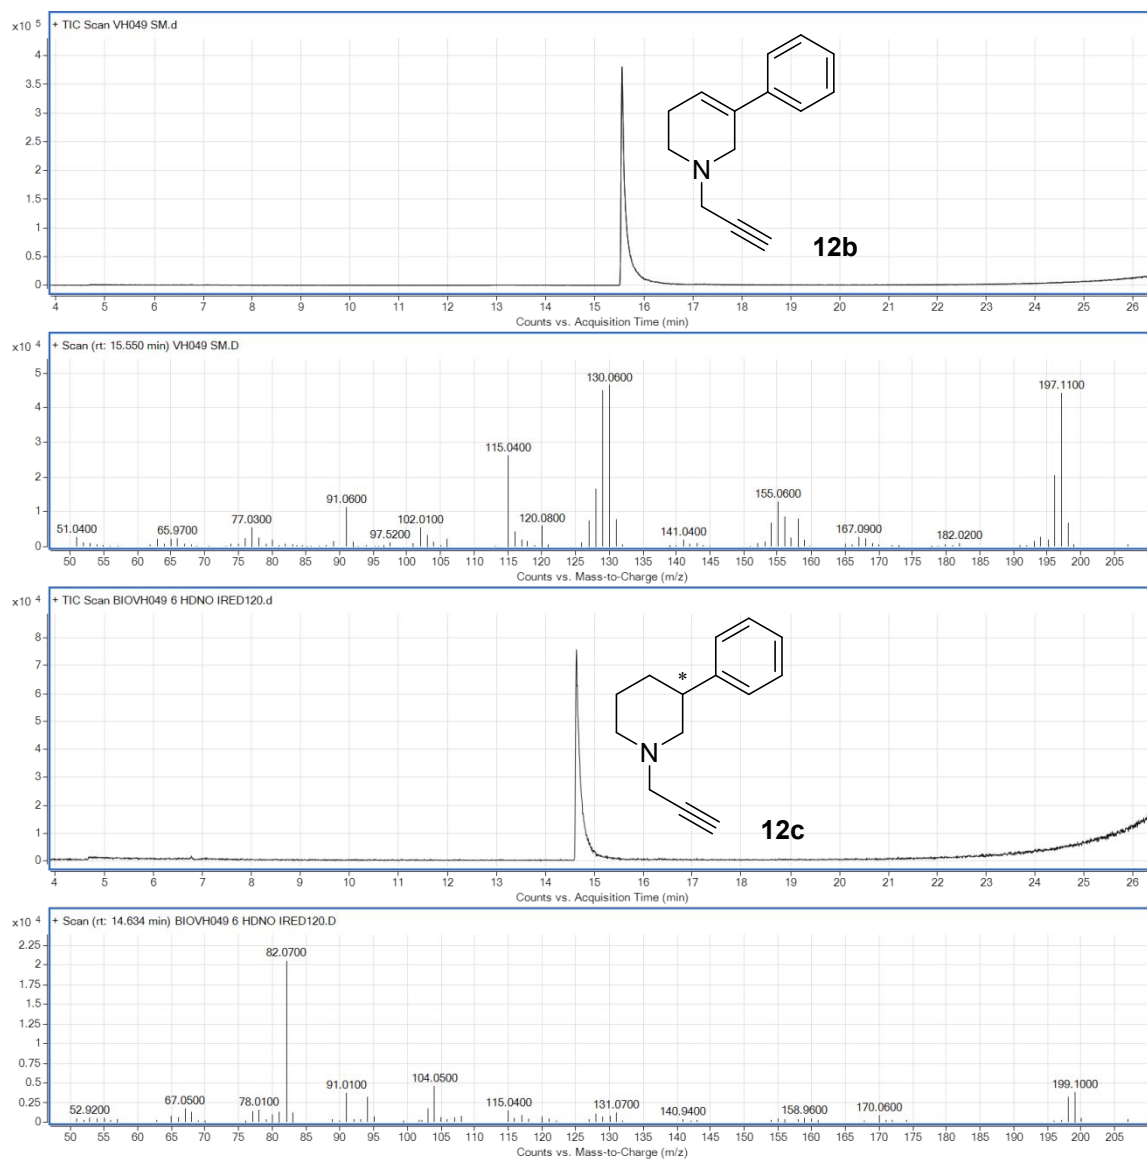

Figure S30: GC-MS spectra for piperidine 12c.

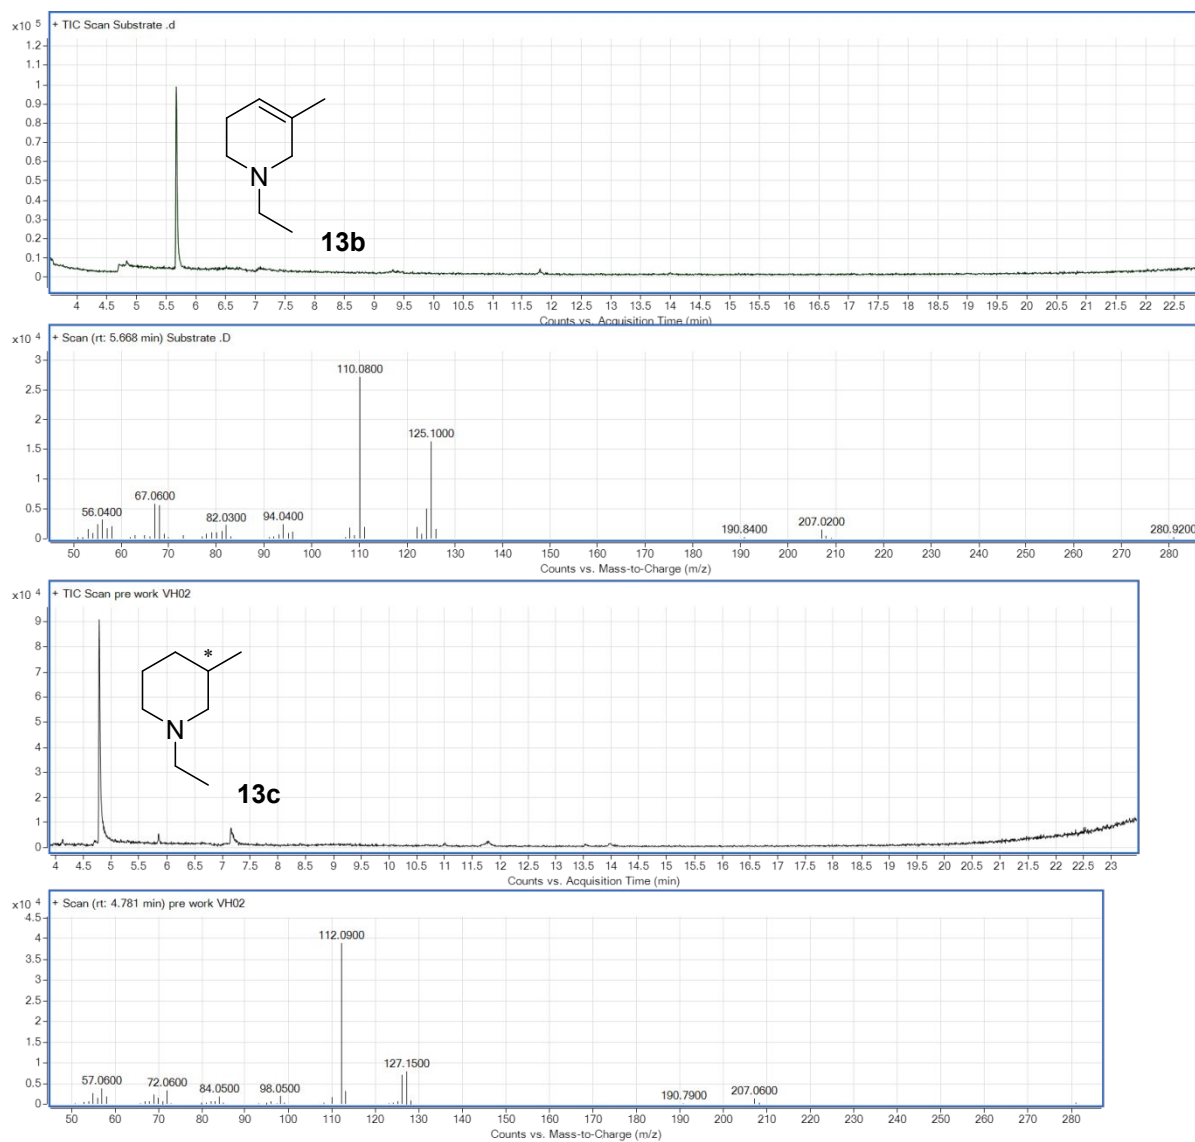

**Figure S31:** GC-MS spectra for piperidine 13c.

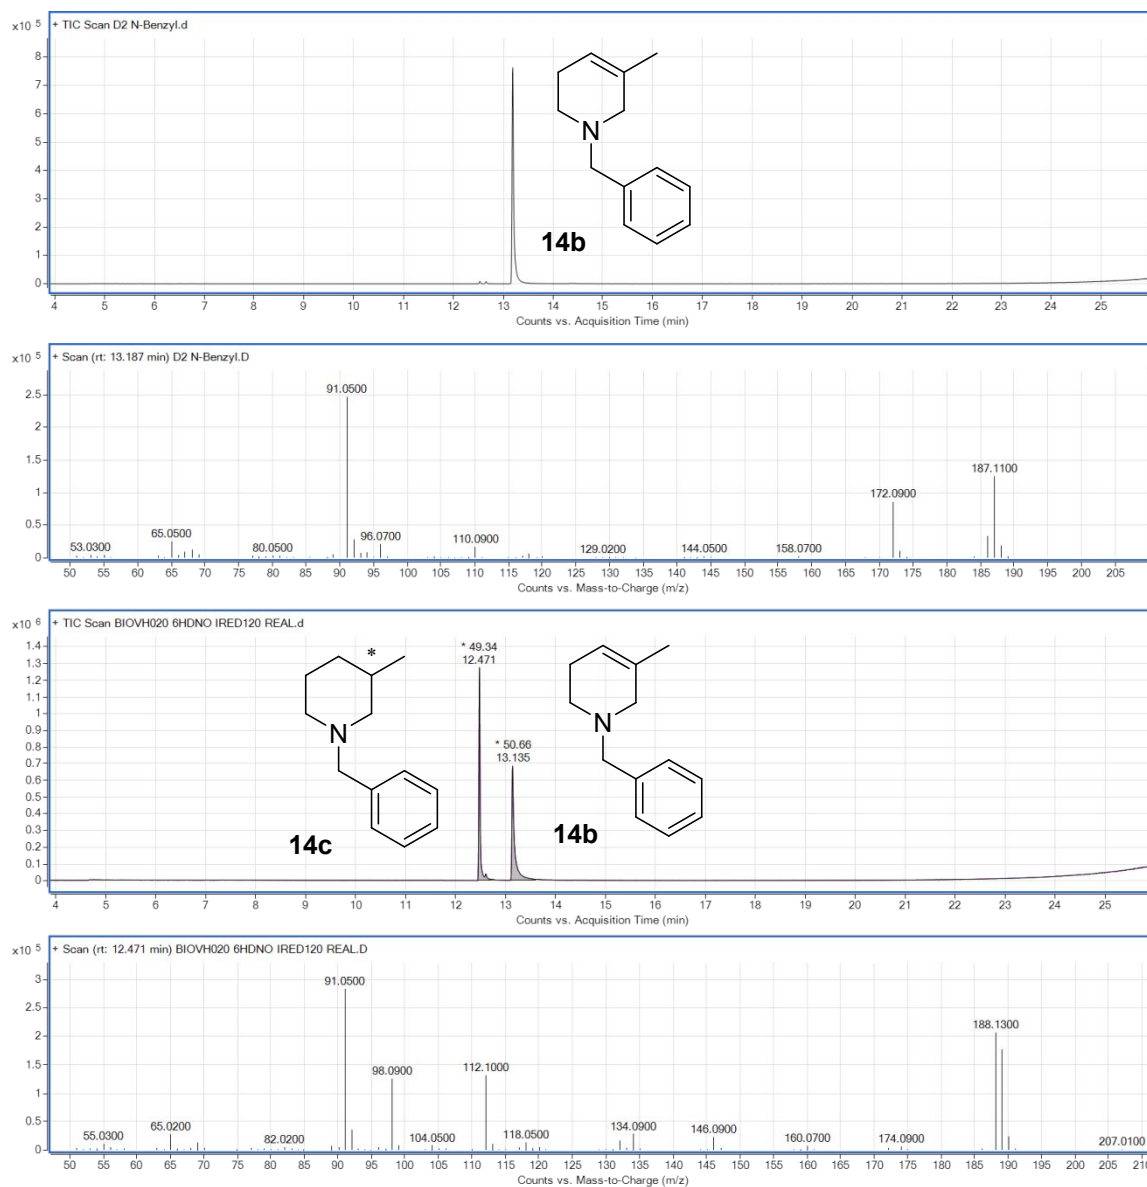

Figure S32: GC-MS spectra for piperidine **14c**.



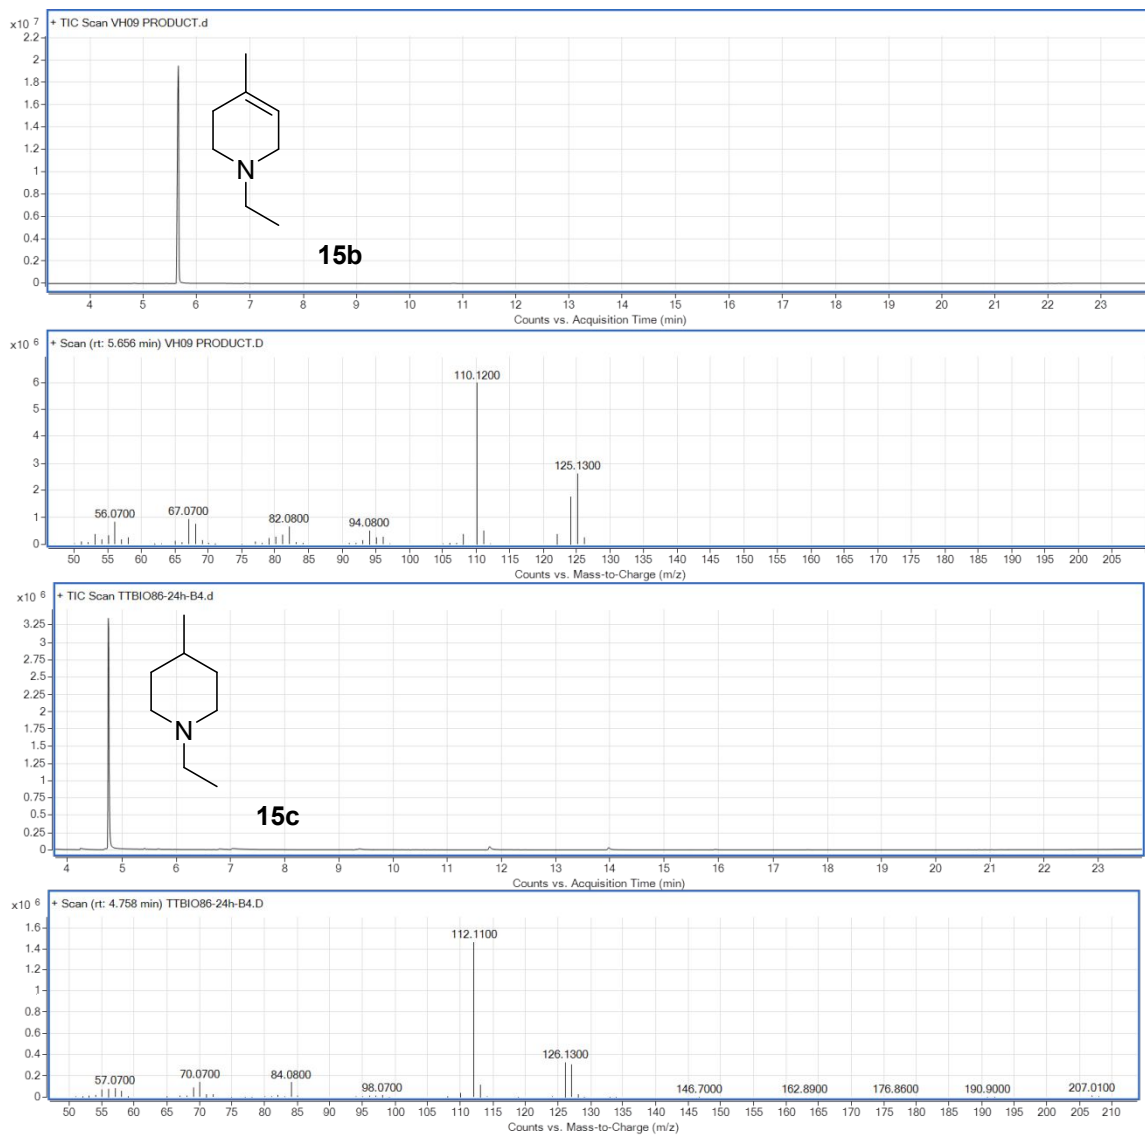

**Figure S33:** GC-MS spectra for piperidine **15c**.

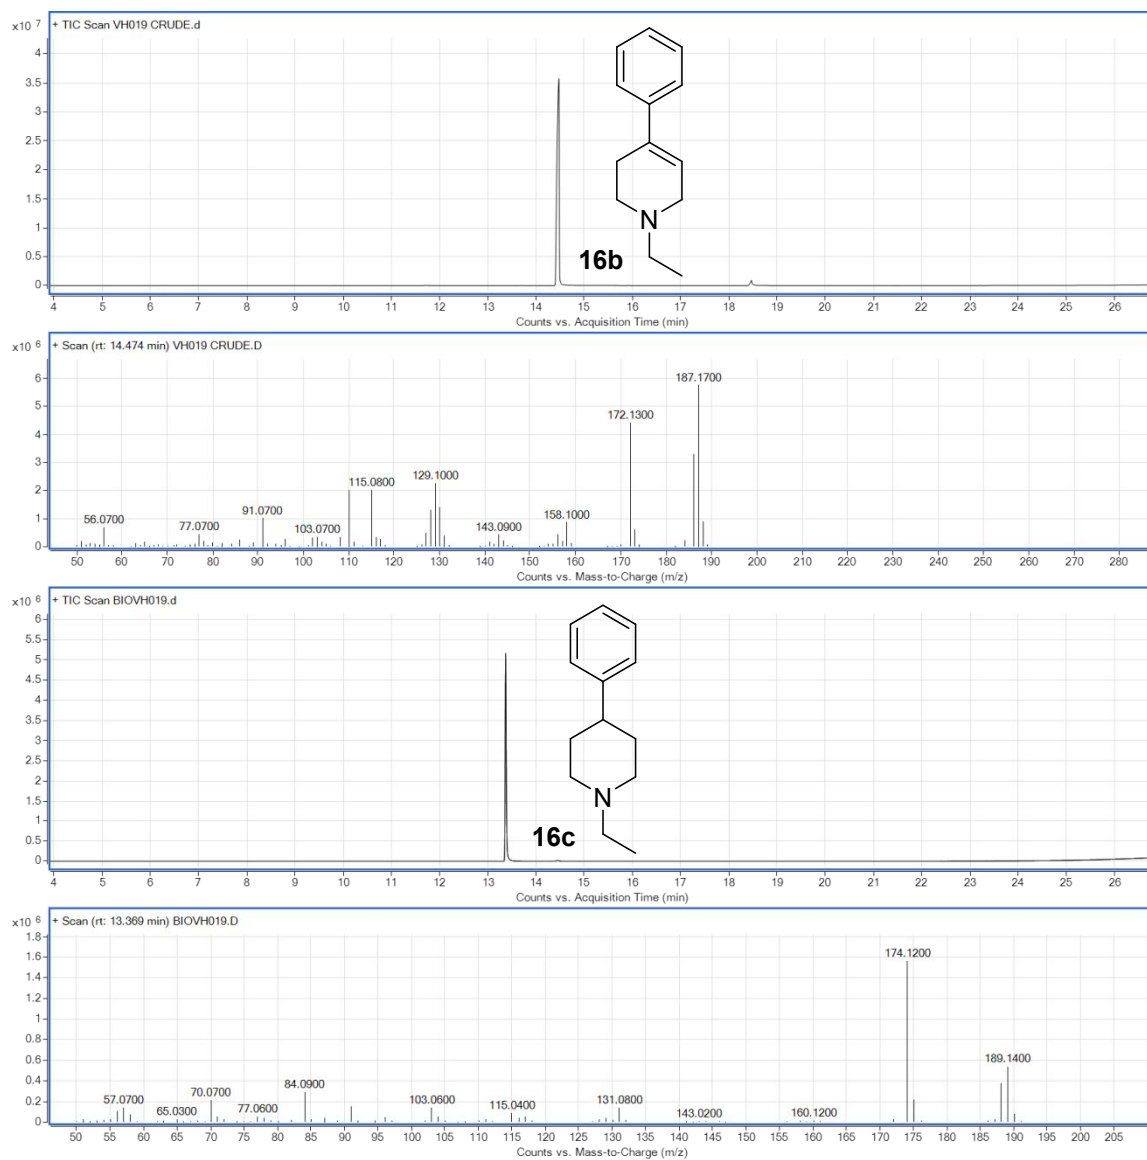

Figure S34: GC-MS spectra for piperidine 16c.

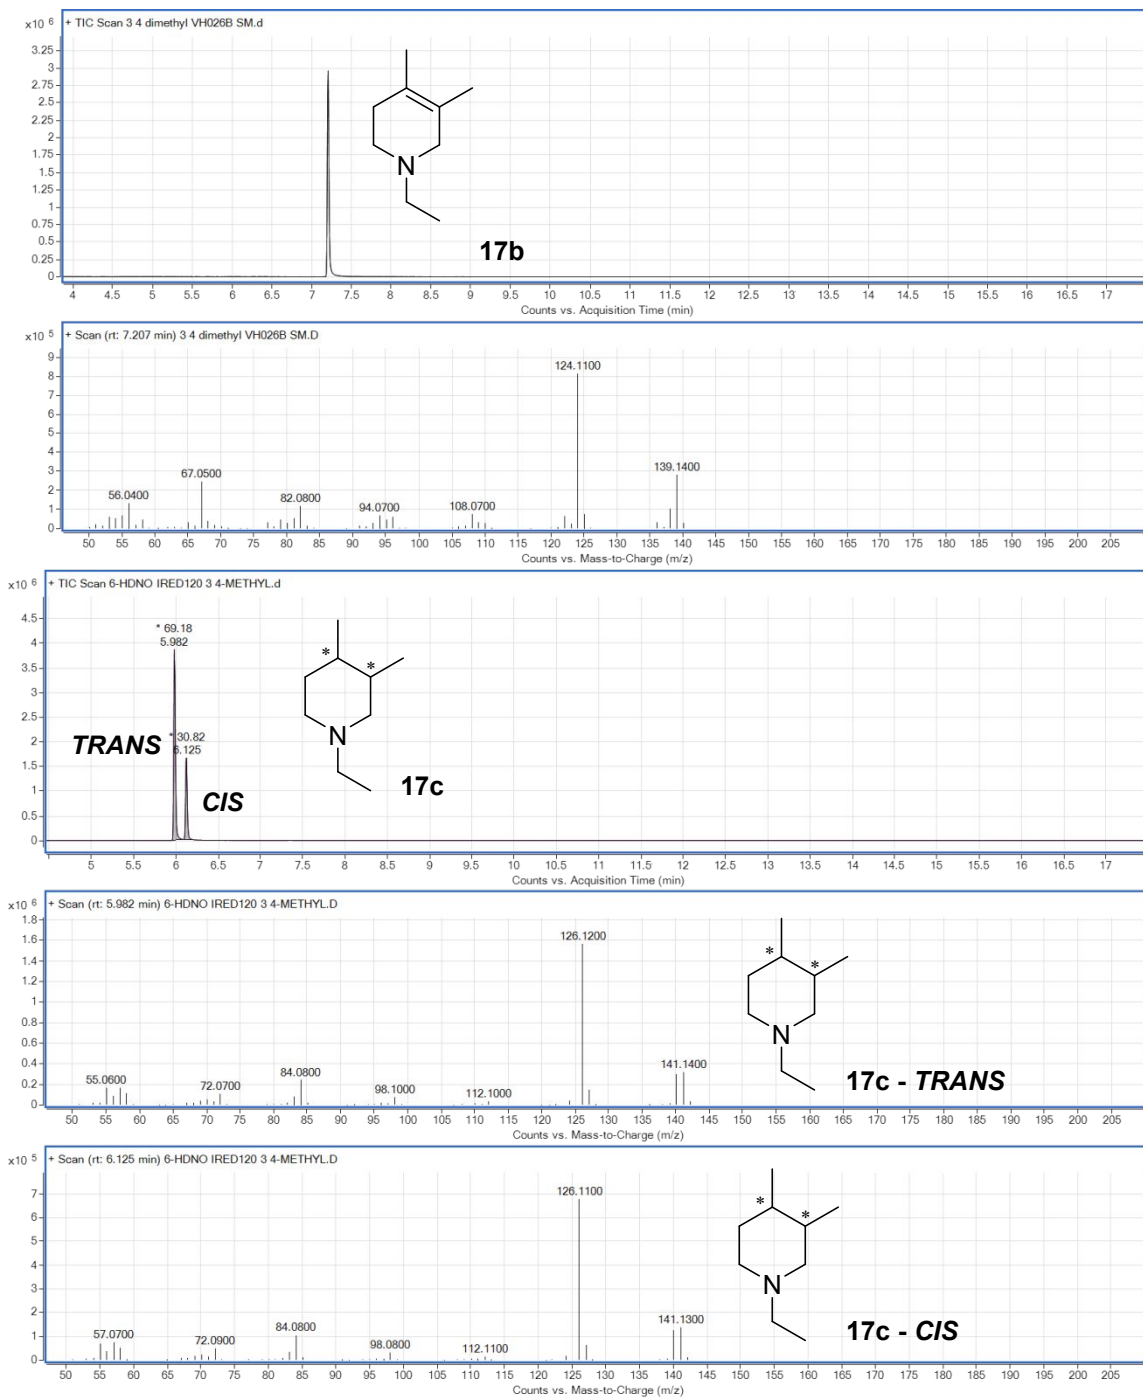

**Figure S35:** GC-MS spectra for piperidine **17c**.

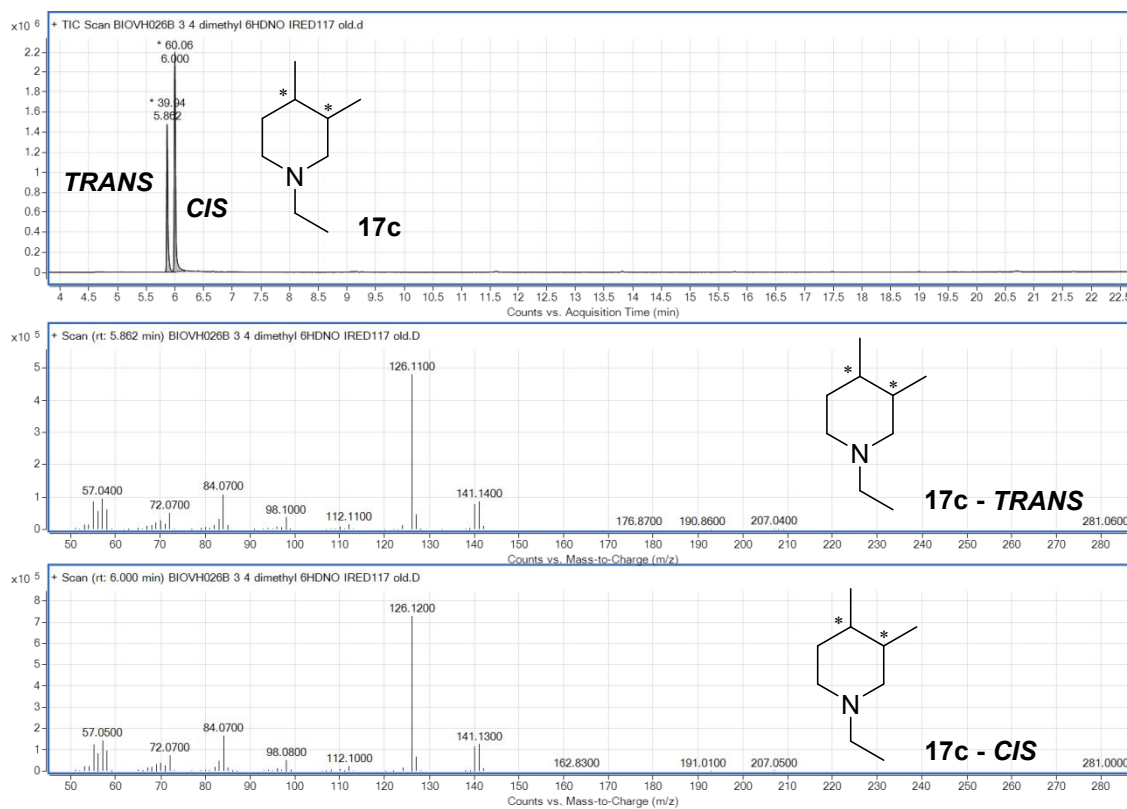

**Figure S36:** GC-MS spectra for piperidine **17c**.

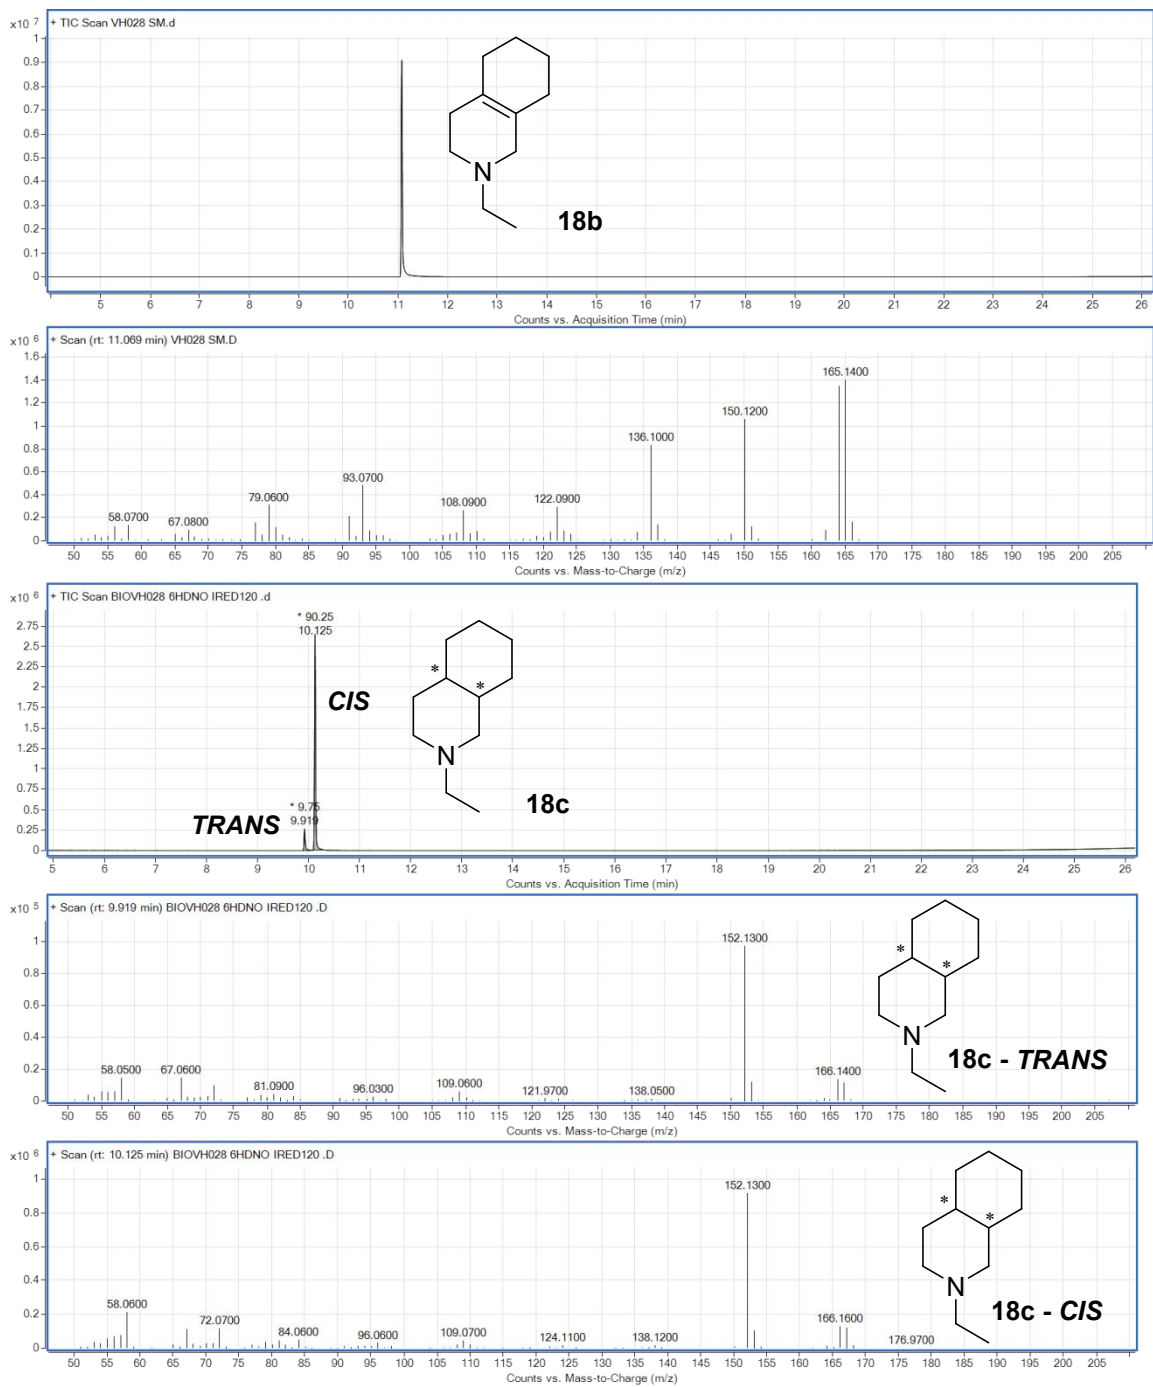

Figure S37: GC-MS spectra for piperidine 18c.

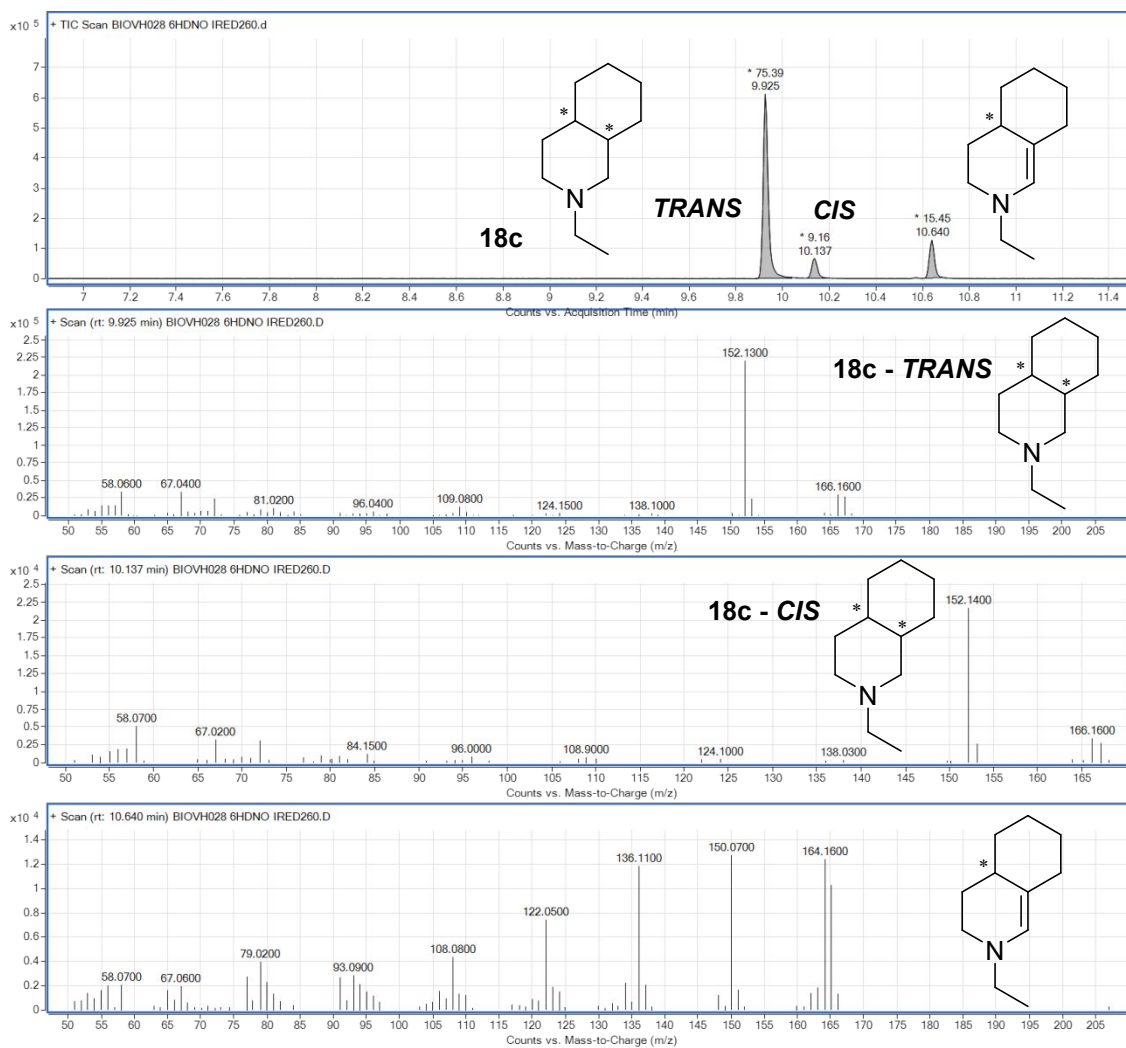

**Figure S38:** GC-MS spectra for piperidine **18c**.

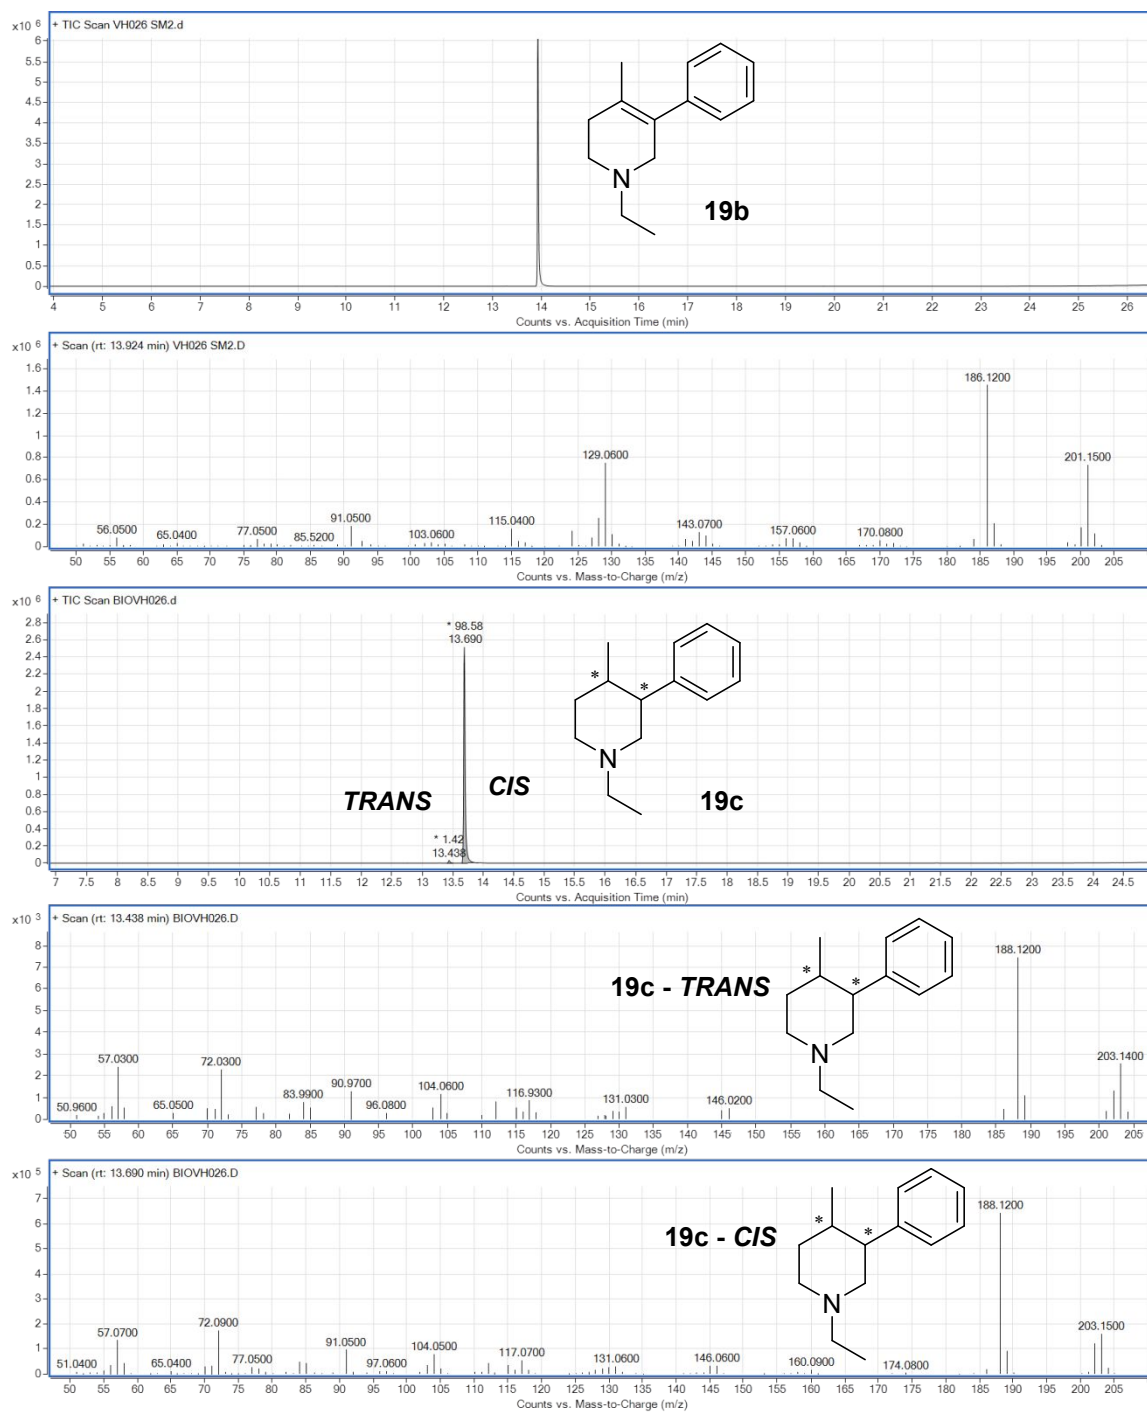

**Figure S39:** GC-MS spectra for piperidine **19c**.

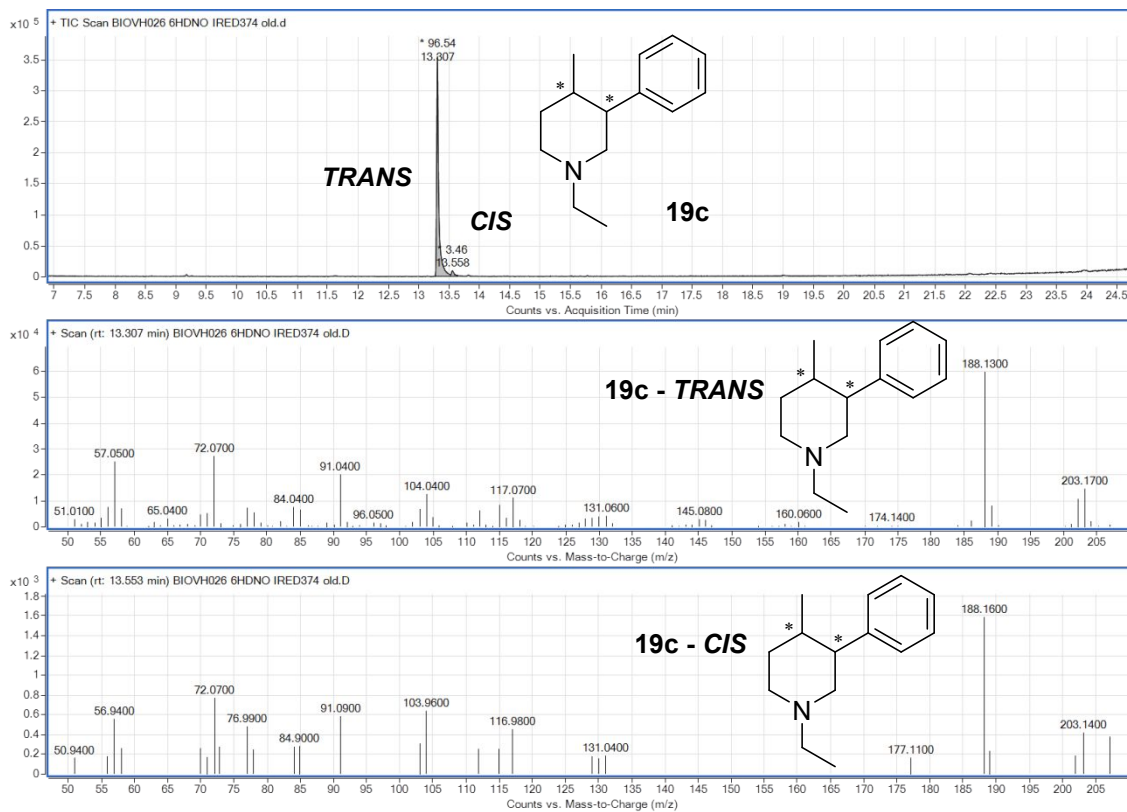

**Figure S40: GC-MS spectra for piperidine 19c.**



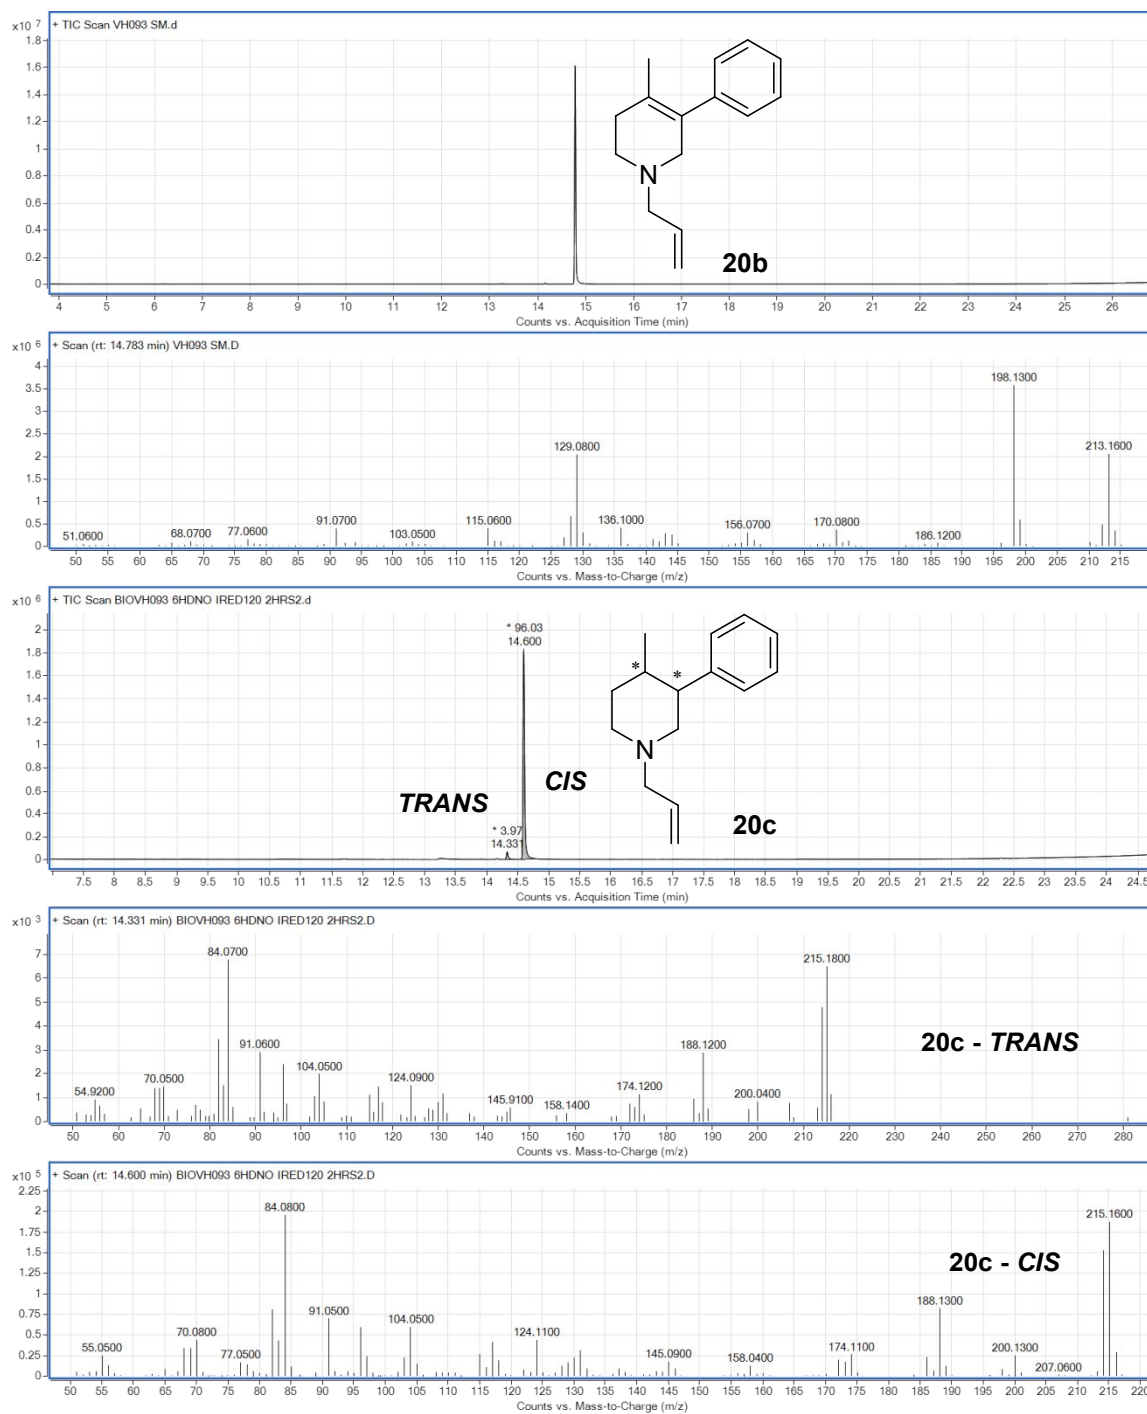

**Figure S41:** GC-MS spectra for piperidine **20c**.

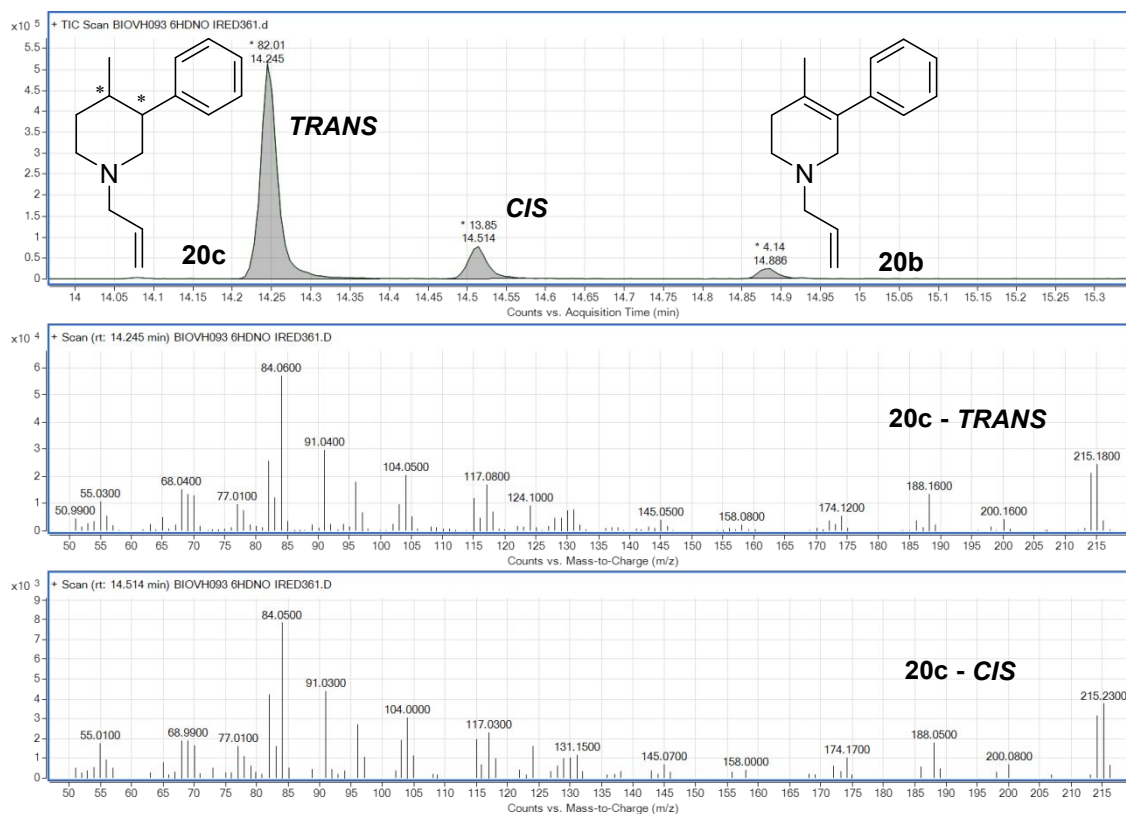

**Figure S42:** GC-MS spectra for piperidine 20c.

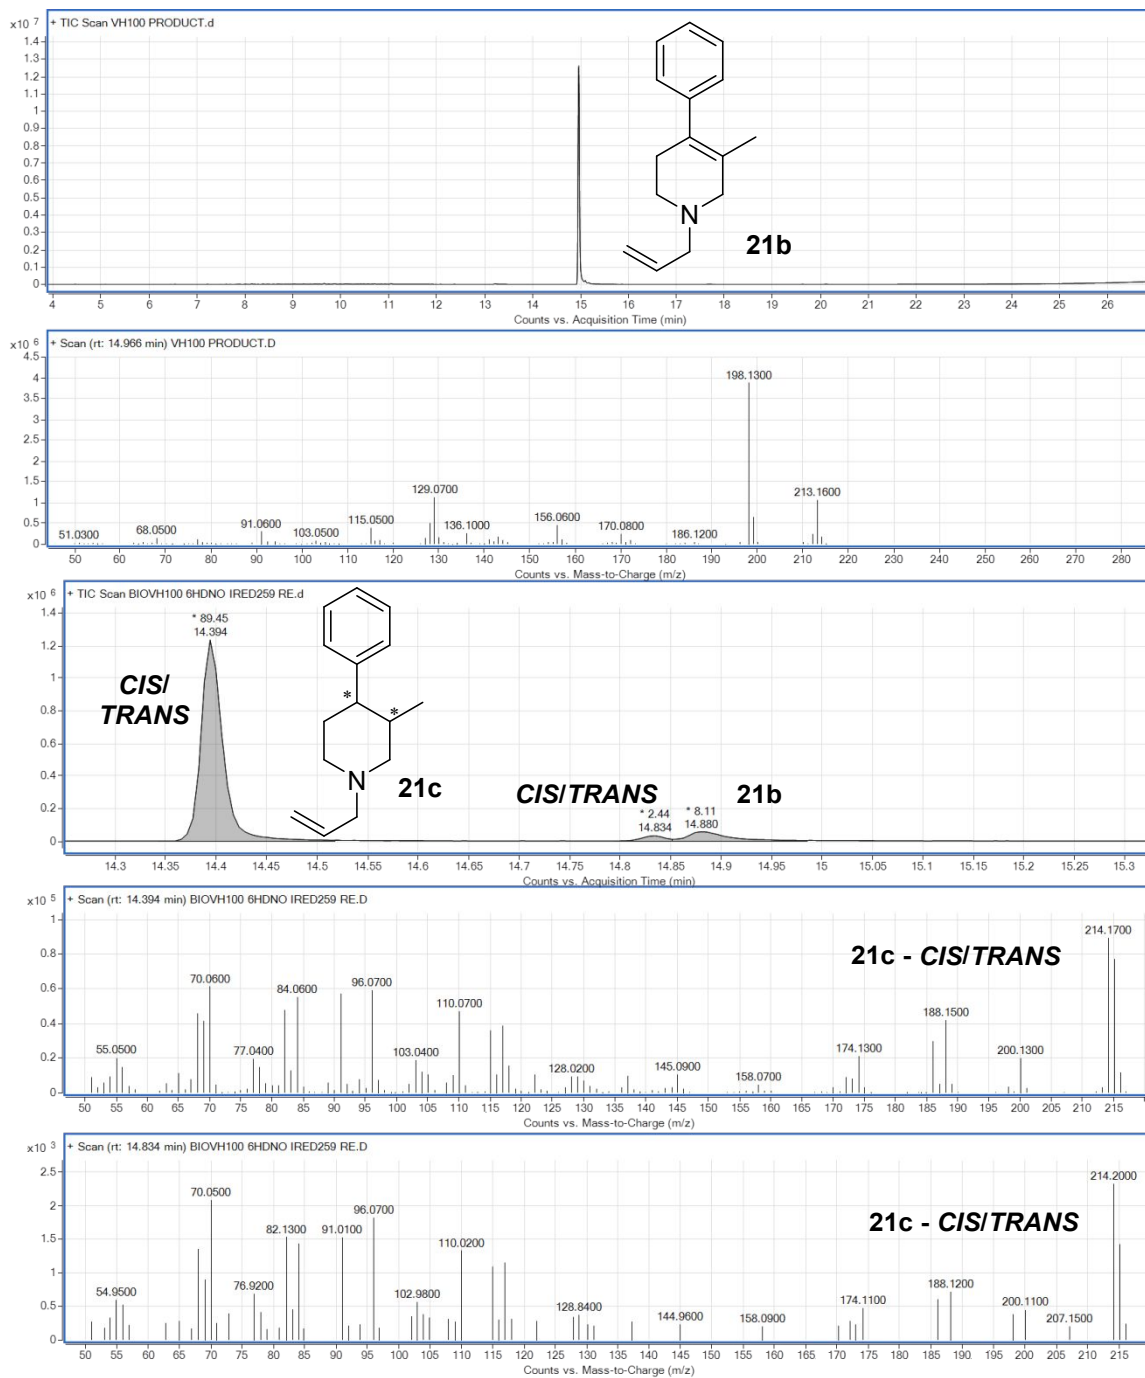

Figure S43: GC-MS spectra for piperidine 21c.

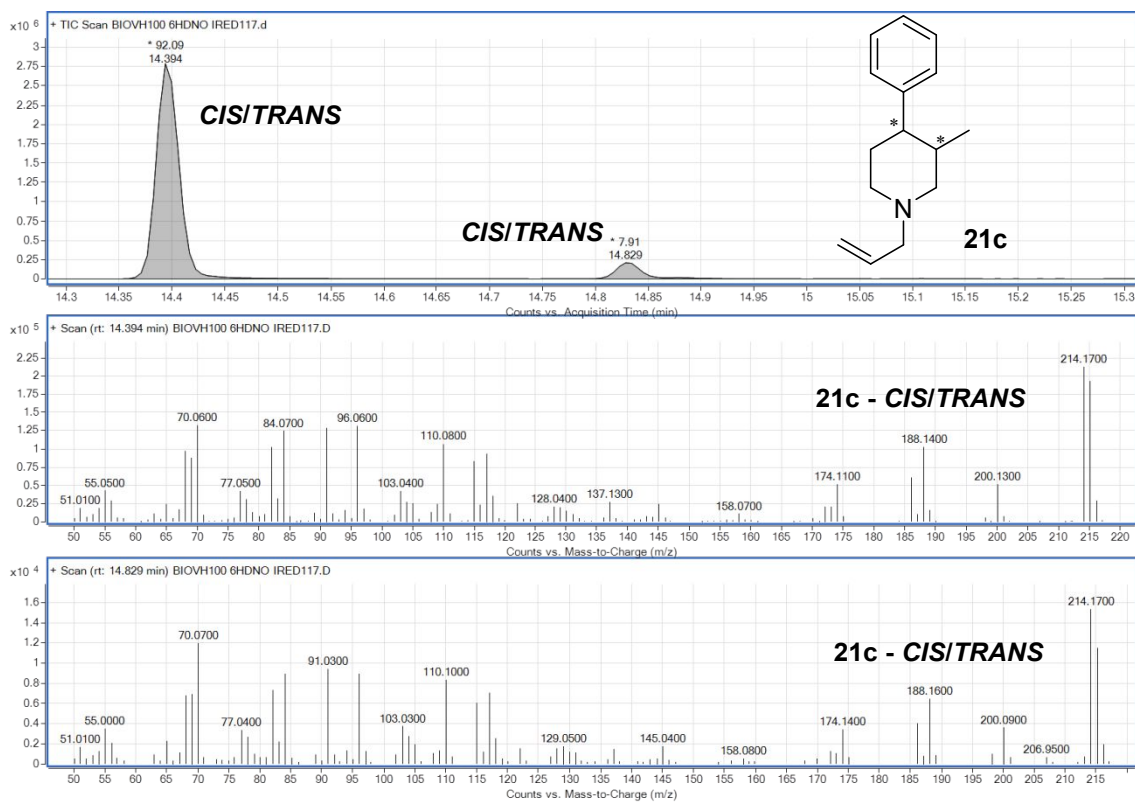

**Figure S44: GC-MS spectra for piperidine 21c.**

## 9. Chiral HPLC Analysis: methods and retention times for piperidine products

**Table S11:** Chiral HPLC analysis: methods and retention times of piperidine from biotransformations.

| Piperidine                        | Column         | n-hexane/IPA/<br>diethylamine<br>running solvent<br>ratio | Piperidine retention time<br>(min) |                |
|-----------------------------------|----------------|-----------------------------------------------------------|------------------------------------|----------------|
|                                   |                |                                                           | T <sup>1</sup>                     | T <sup>2</sup> |
| <b>1c</b>                         | CHIRALPAK®IE   | 99:1:0.1                                                  | 9.7 (S)                            | 11.3 (R)       |
| <b>28</b>                         | CHIRALPAK®IC   | 98:2:0.1                                                  | 19.2 (S)                           | 27.0 (R)       |
| <b>2c</b>                         | CHIRALPAK®AD-H | 95:5:0.1                                                  | 12.1 (S)                           | 13.8 (R)       |
| <b>3c</b> (after hydrogenation )  | CHIRALPAK®IA   | 99.5:0.5:0.1                                              | 5.8 (S)                            | 8.0 (R)        |
| <b>4c</b> (after hydrogenation )  | CHIRALPAK®AD-H | 90:10:0.1                                                 | 8.4 (R)                            | 11.0 (S)       |
| <b>6c</b>                         | CHIRALPAK®IE   | 99.5:0.5:0.1                                              | 7.5 (S)                            | 8.1 (R)        |
| <b>7c</b>                         | CHIRALPAK®IE   | 99:1:0.1                                                  | 9.6 (S)                            | 11.2 (R)       |
| <b>9c</b>                         | CHIRALPAK®IE   | 99.5:0.5:0.1                                              | 7.3 (R)                            | 7.8 (S)        |
| <b>10c</b>                        | CHIRALPAK®AD-H | 98:2:0.1                                                  | 5.8 (R)                            | 6.4 (S)        |
| <b>12c</b> (after hydrogenation ) | CHIRALPAK®IE   | 99.5:0.5:0.1                                              | 7.5 (A)                            | 8.1 (B)        |

Absolute configurations were assigned by comparison with compounds of known configuration and VCD (see **section 4**).

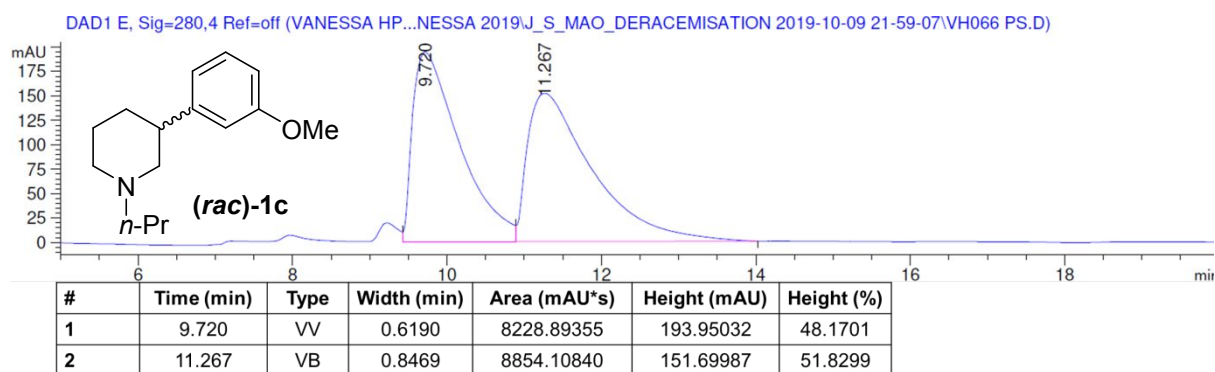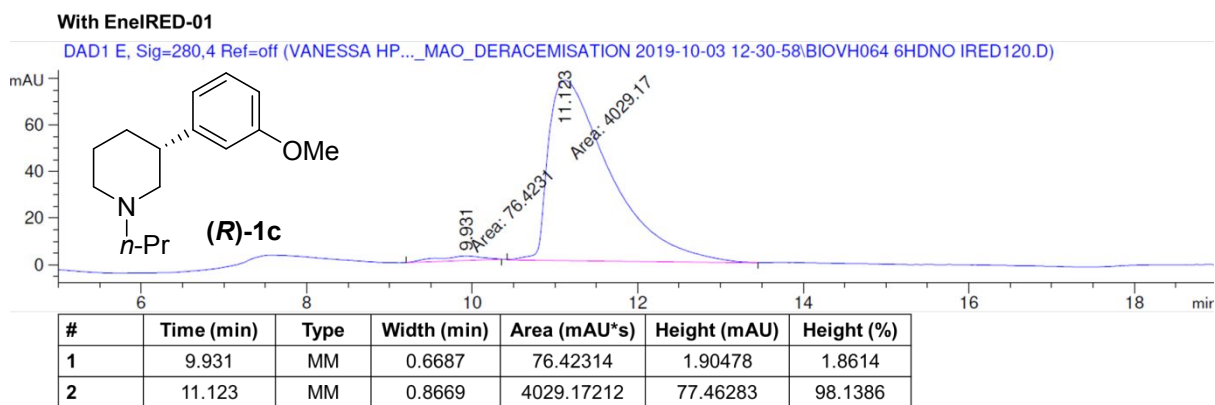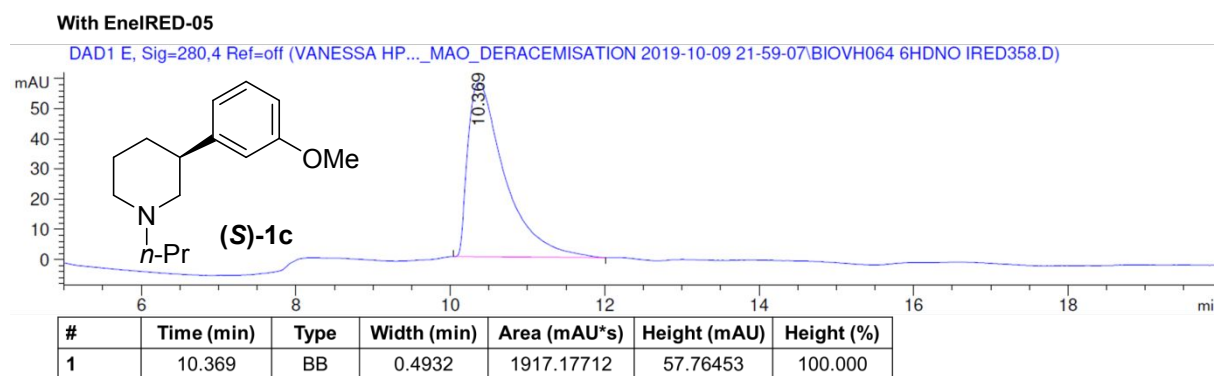

Figure S45: Chiral HPLC spectra for piperidine 1c.

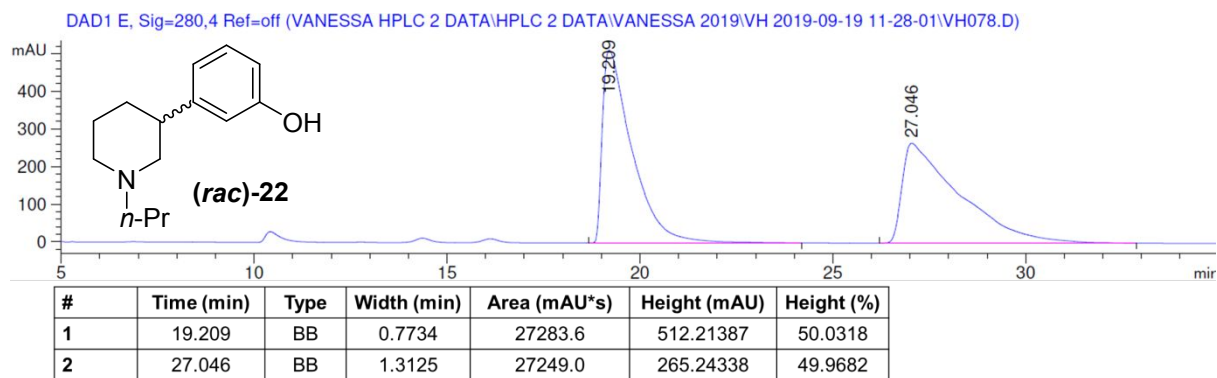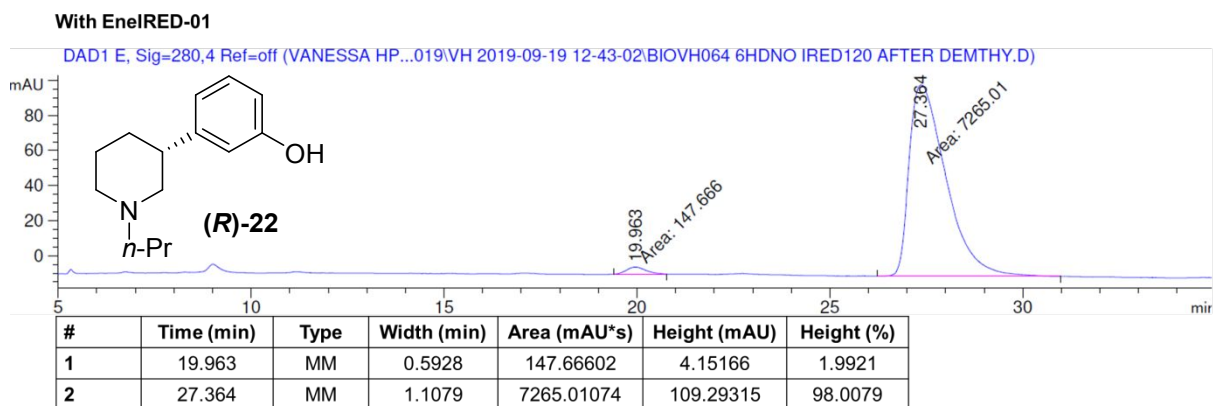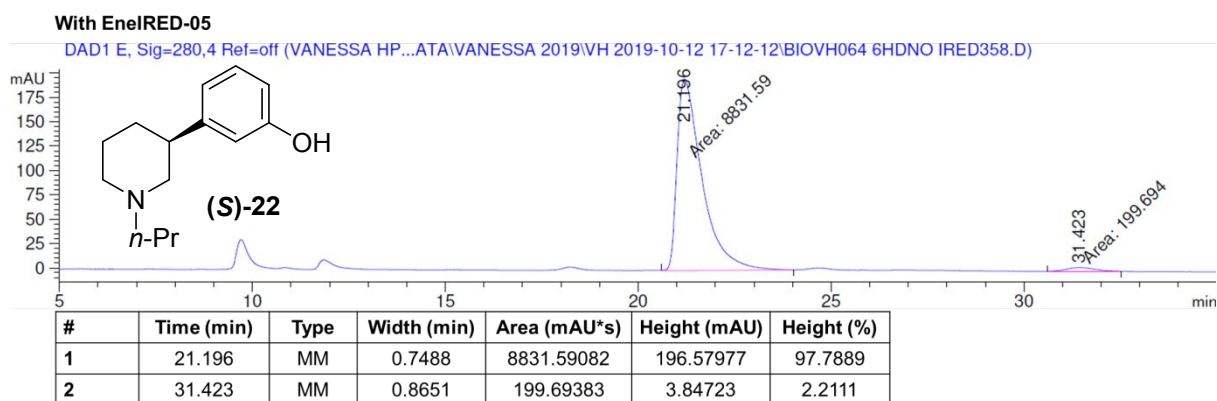

Figure S46: Chiral HPLC spectra for piperidine 22.

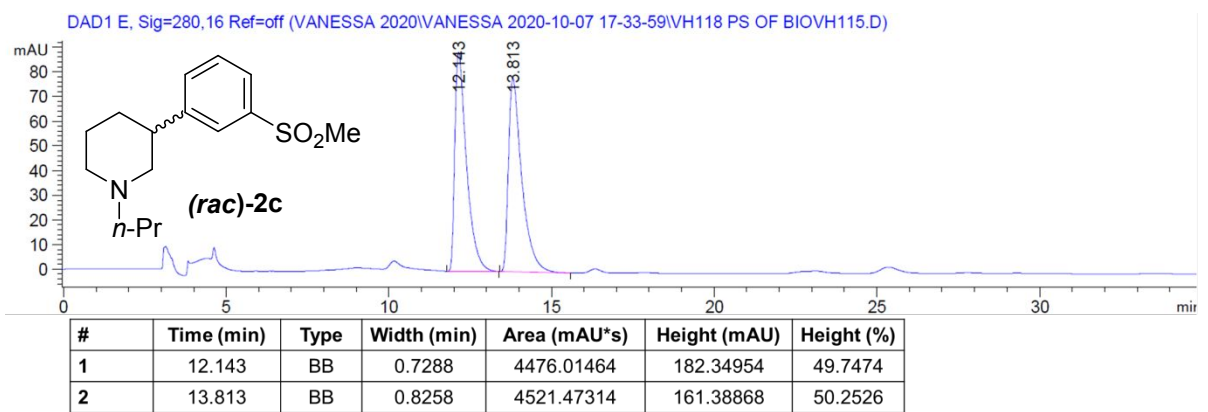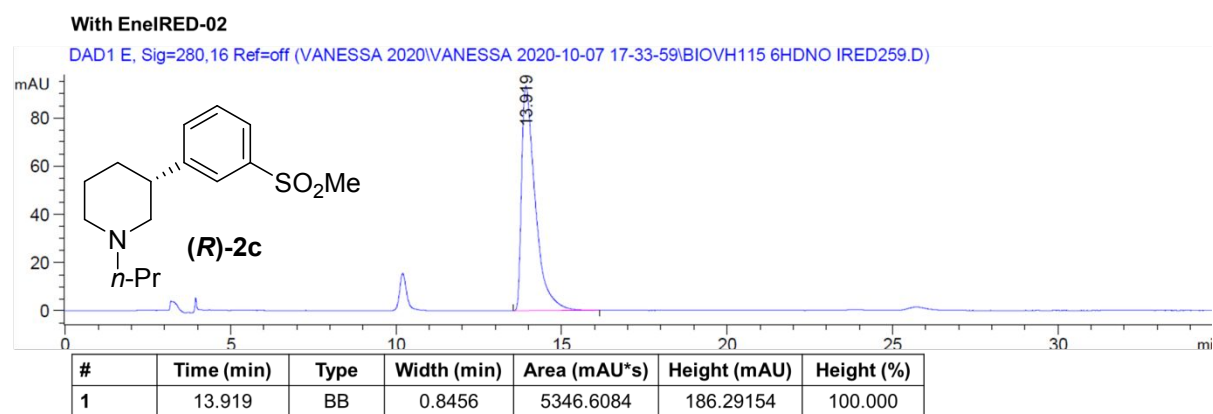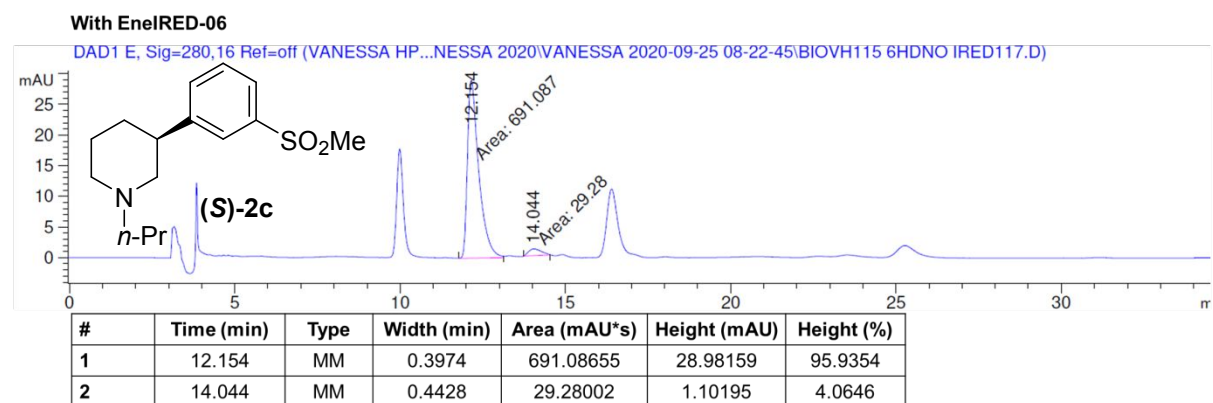

Figure S47: Chiral HPLC spectra for piperidine **2c**.



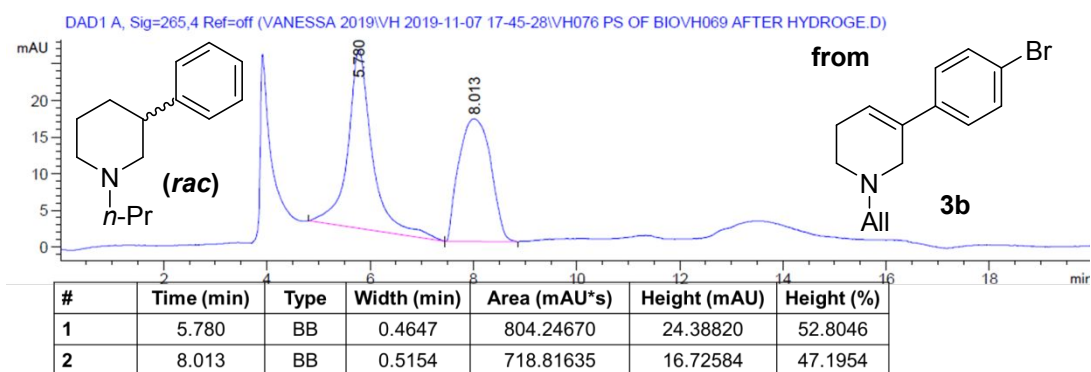

With EnelRED-01

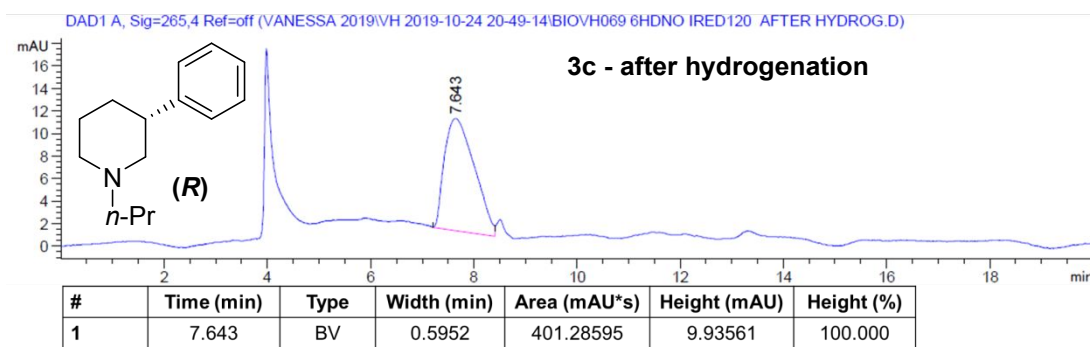

With EnelRED-07

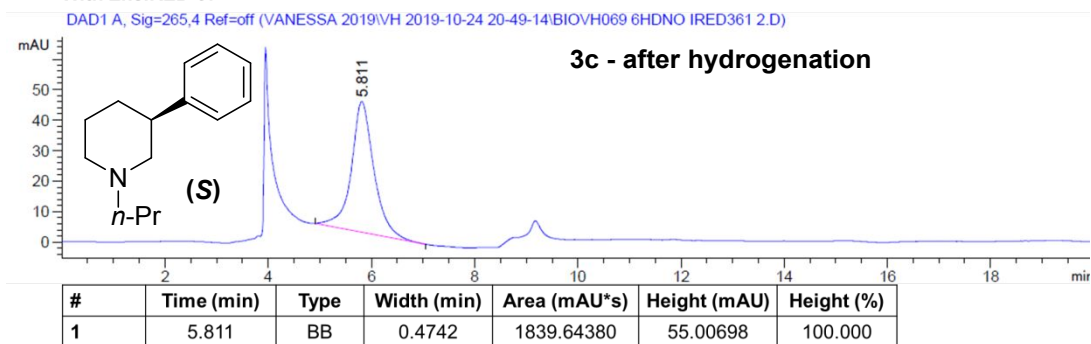

Figure S48: Chiral HPLC spectra for piperidine **3c** (after hydrogenation).

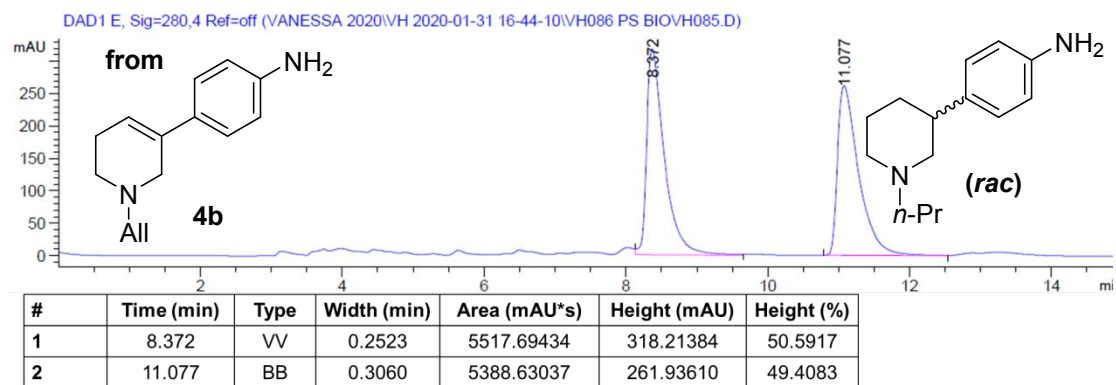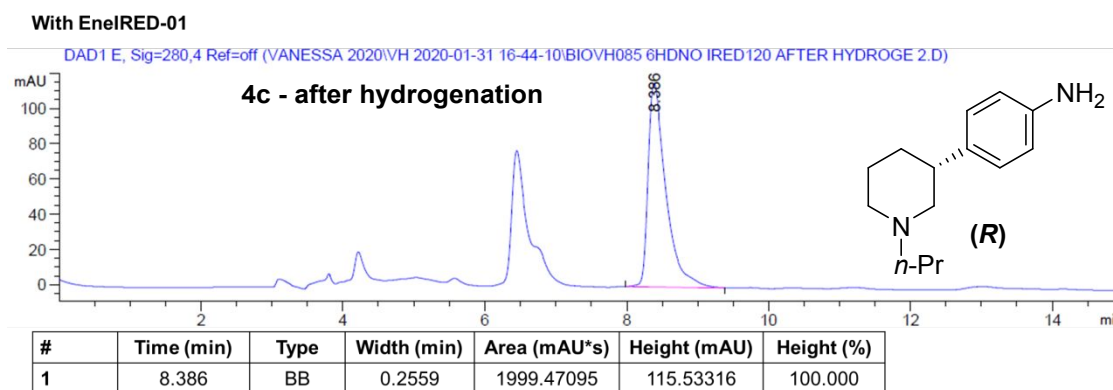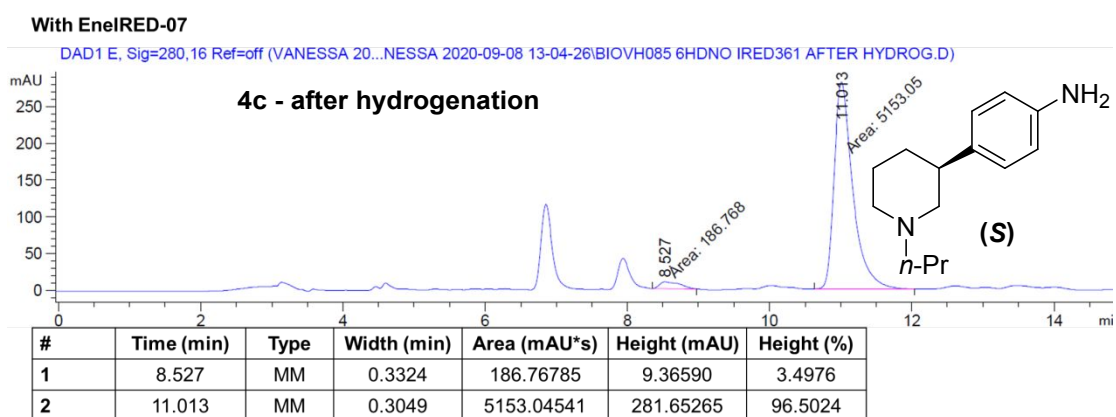

Figure S49: Chiral HPLC spectra for piperidine **4c** (after hydrogenation).

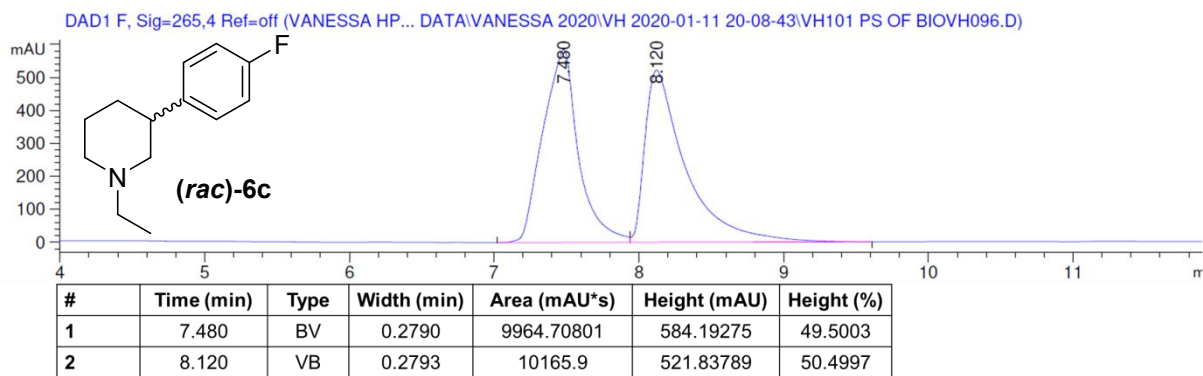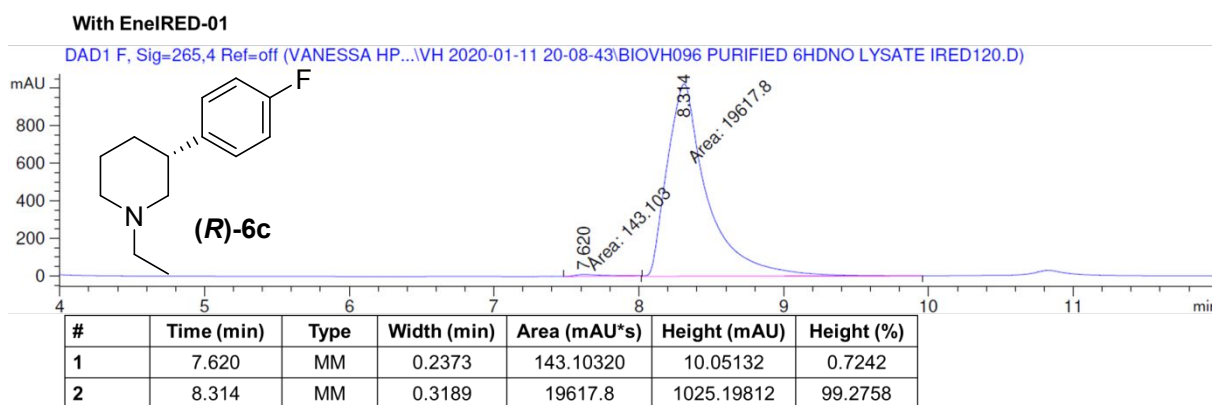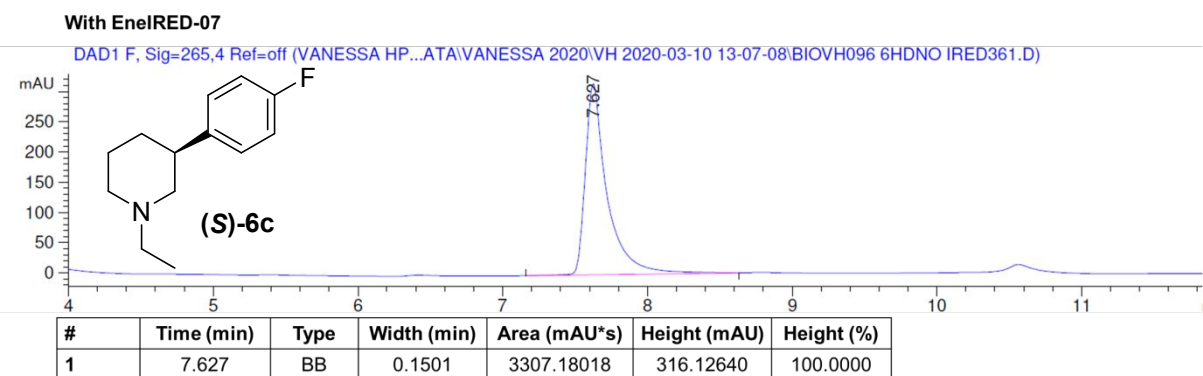

Figure S50: Chiral HPLC spectra for piperidine **6c**.

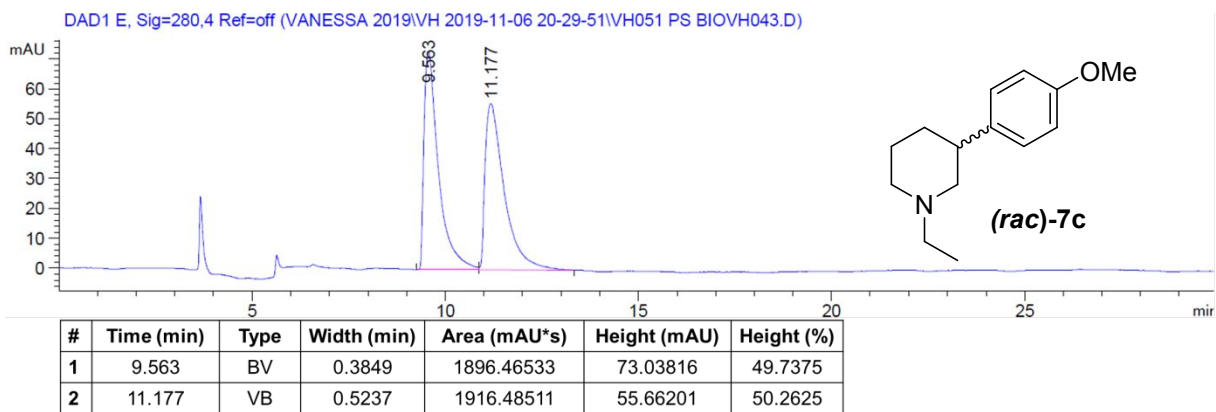

With EnelRED-01

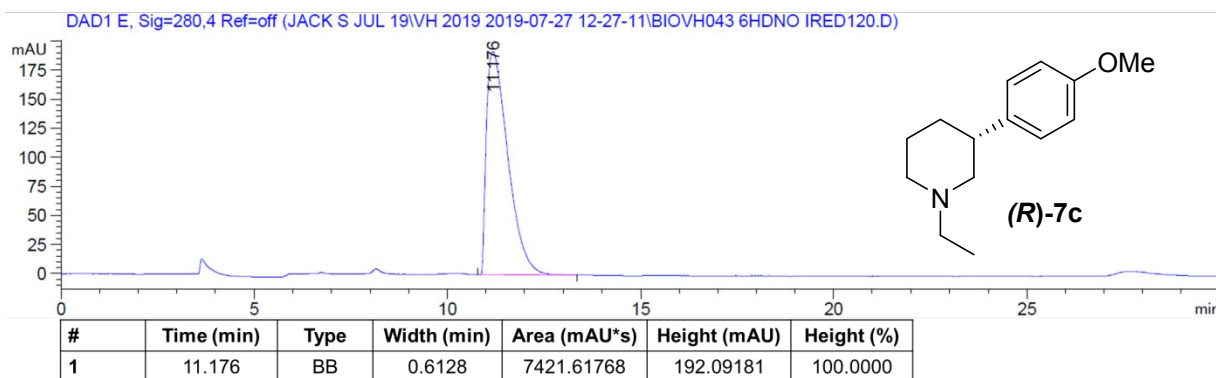

With EnelRED-07

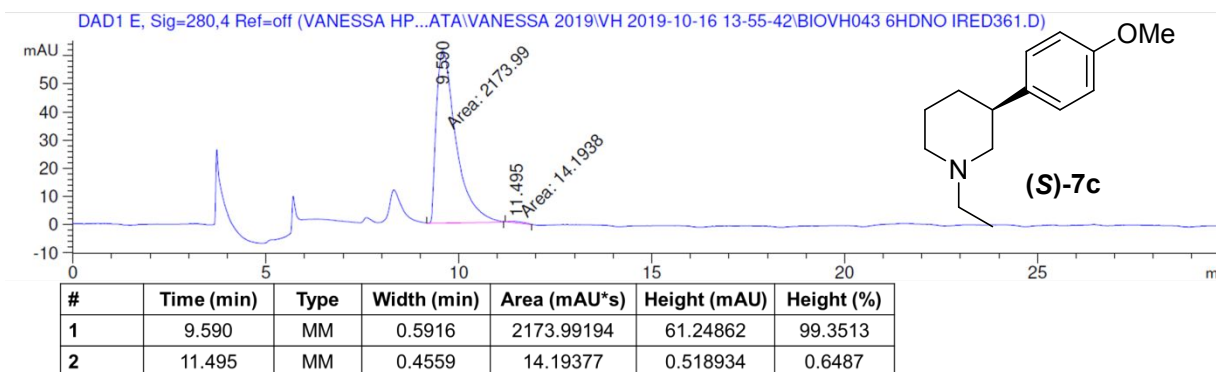

Figure S51: Chiral HPLC spectra for piperidine 7c.

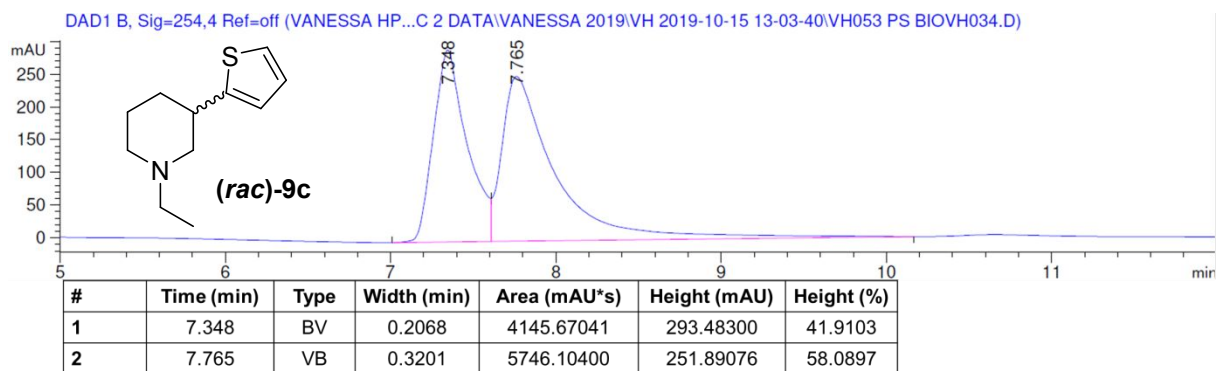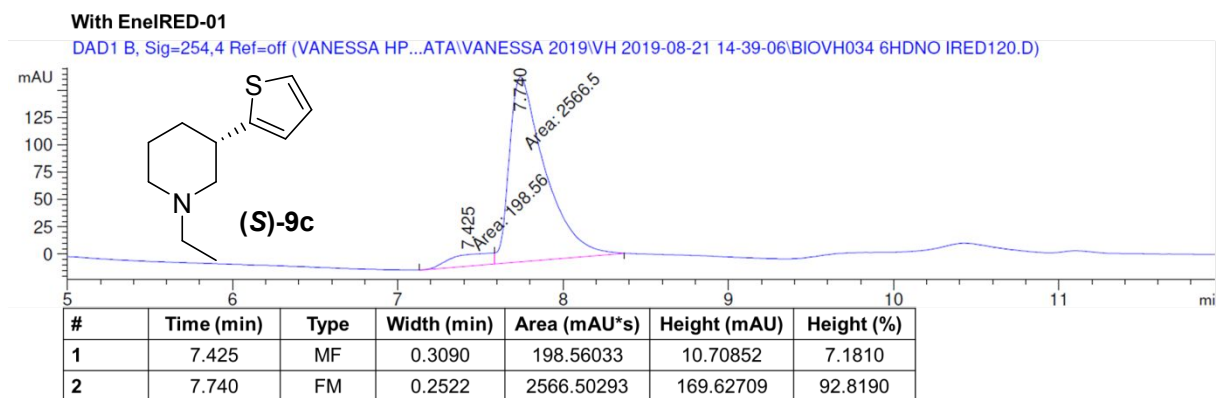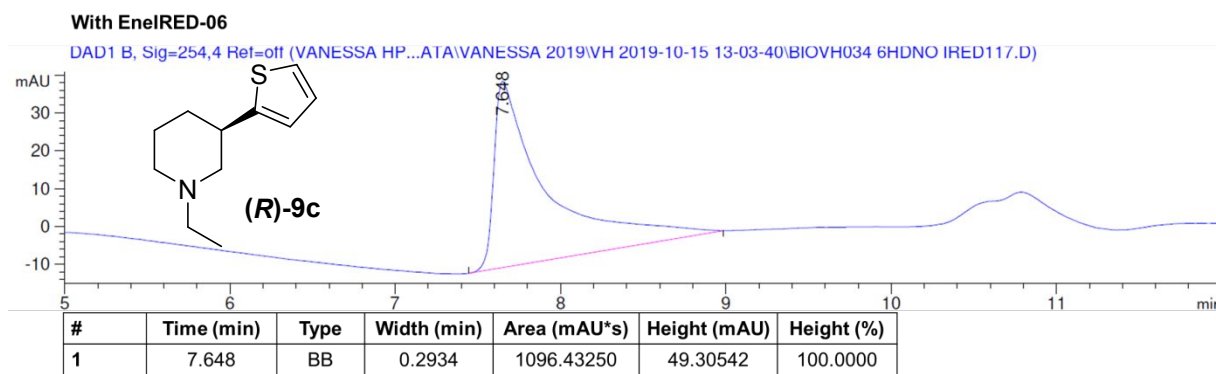

**Figure S52:** Chiral HPLC spectra for piperidine **9c**.

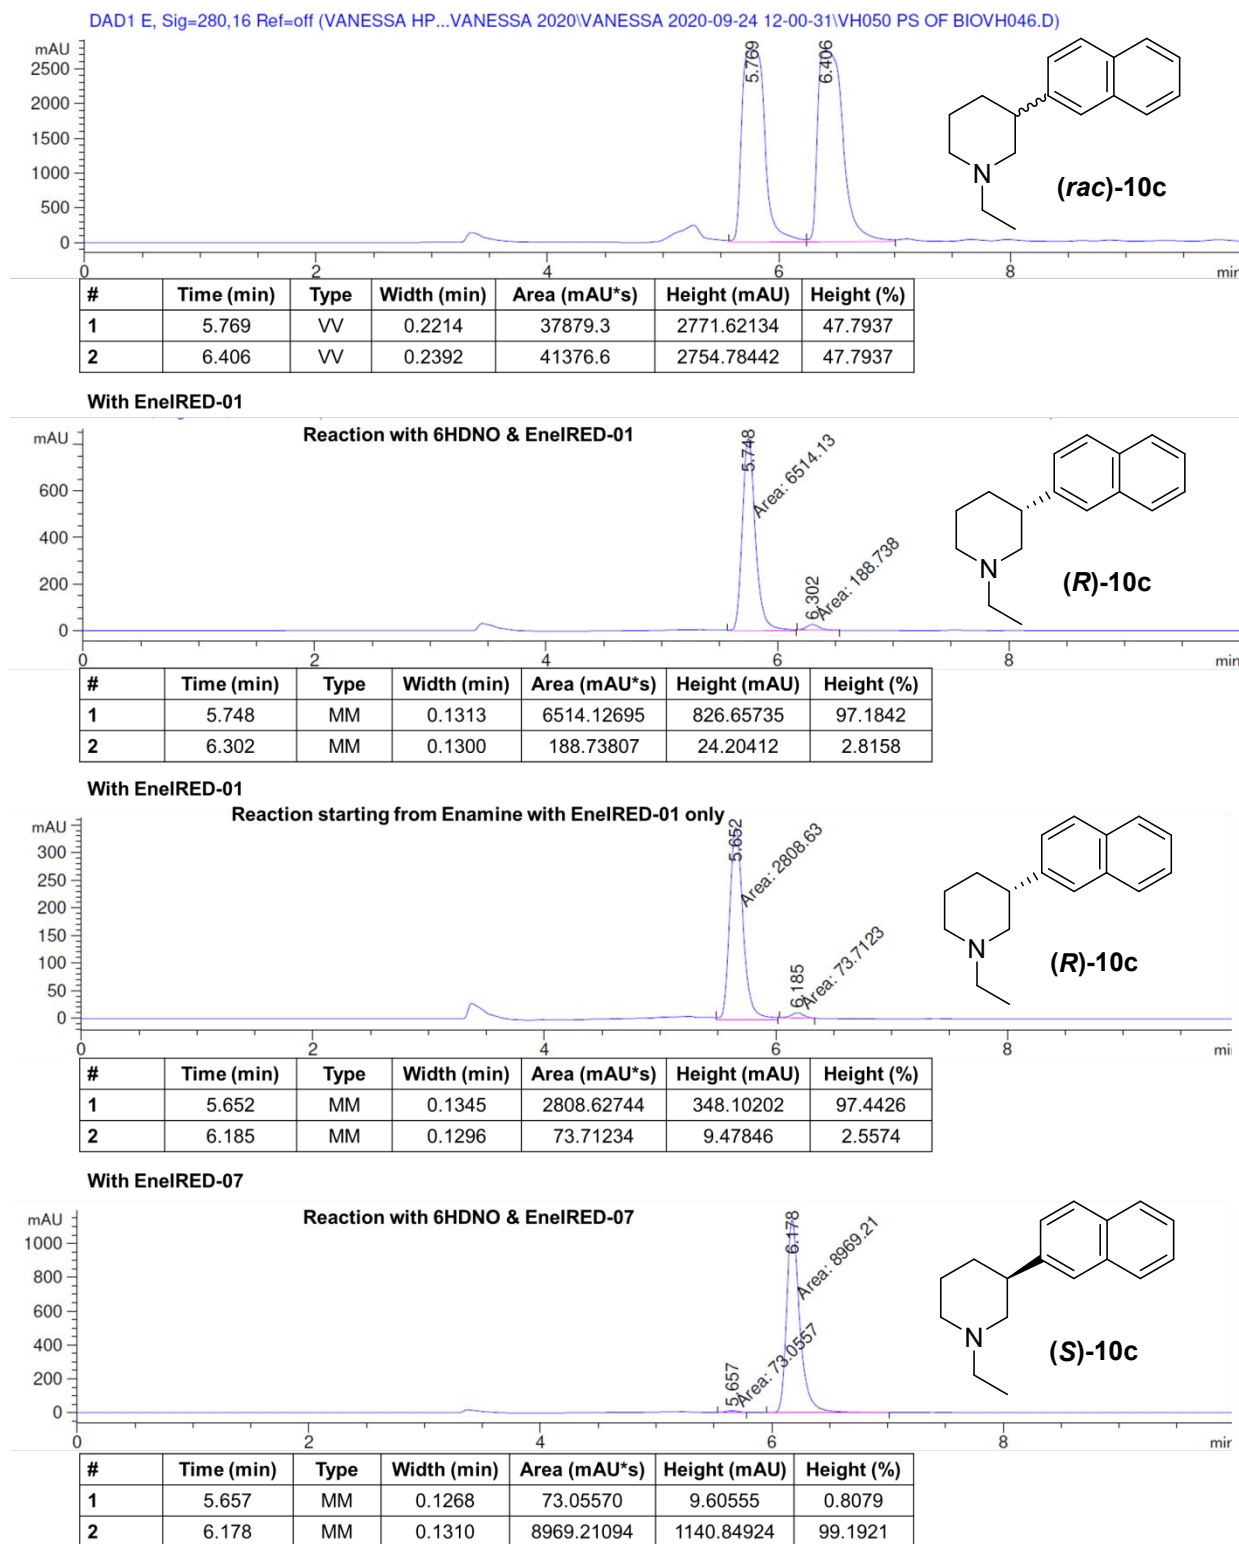

Figure S53: Chiral HPLC spectra for piperidine 10c.

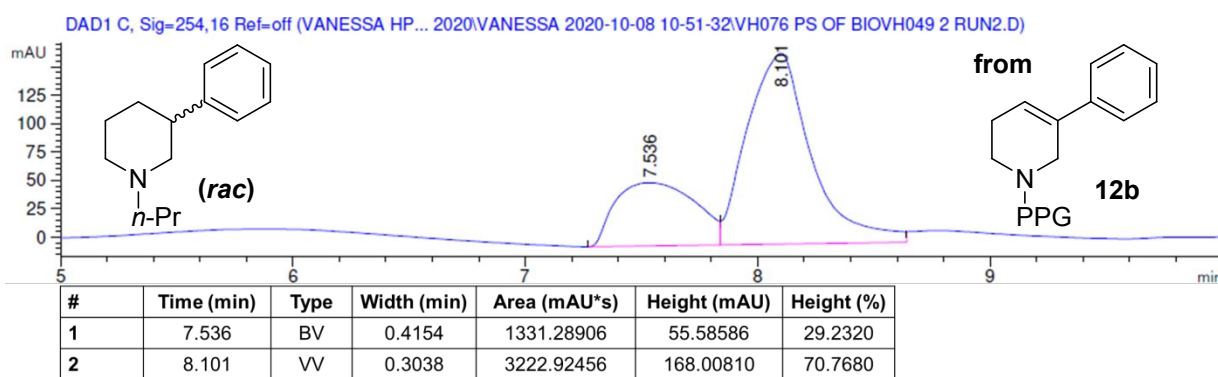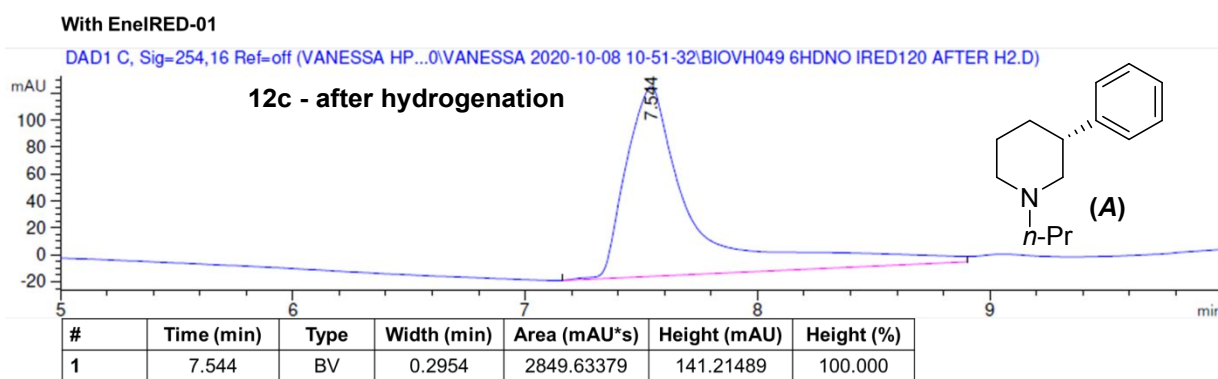

Figure S54: Chiral HPLC spectra for piperidine 12c.

## 10. Chiral GC Analysis: methods and retention times for piperidine products

**Table S12:** Chiral GC analysis: methods and retention times of piperidine products from biotransformations.

| Piperidine product | Column           | Oven temp.                             | Piperidine products retention time (min) |      |                |      |
|--------------------|------------------|----------------------------------------|------------------------------------------|------|----------------|------|
|                    |                  |                                        | T <sup>1</sup>                           |      | T <sup>2</sup> |      |
| <b>8c</b>          | Supelco BDEX-325 | 50 – 200 °C,<br>2 °C min <sup>-1</sup> | 41.1 (S)                                 |      | 41.3 (R)       |      |
| <b>17c</b>         | Supelco BDEX-325 | 50 – 200 °C,<br>2 °C min <sup>-1</sup> | 17.0                                     | 17.2 | 17.9           | 18.4 |
| <b>18c</b>         | Supelco BDEX-325 | 50 – 200 °C,<br>2 °C min <sup>-1</sup> | 36.2                                     | 36.4 | 37.3           | 37.8 |

Injector temperature: 200 °C, detector temperature: 250 °C, helium flow: 1.2 mL/min.



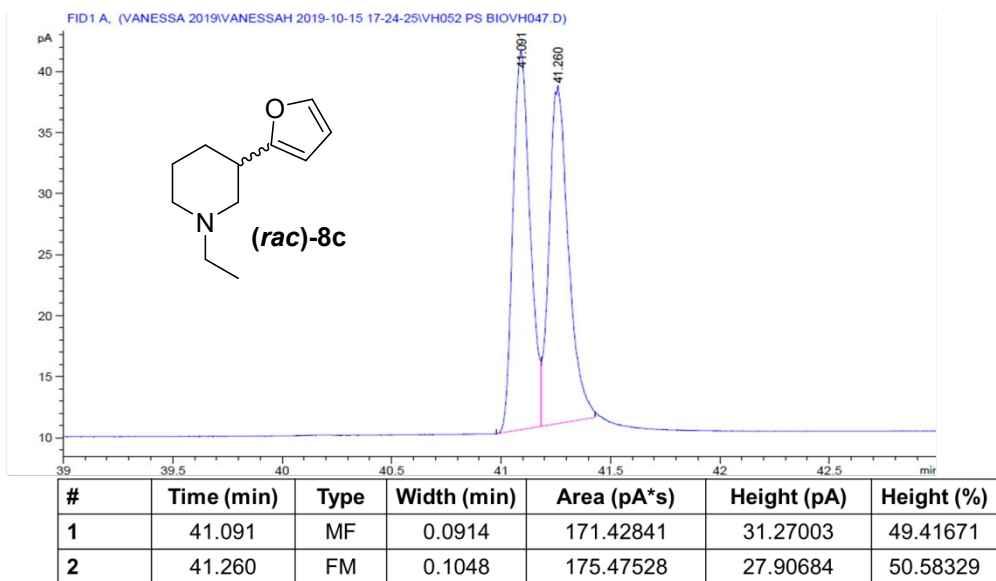

With EnelRED-01

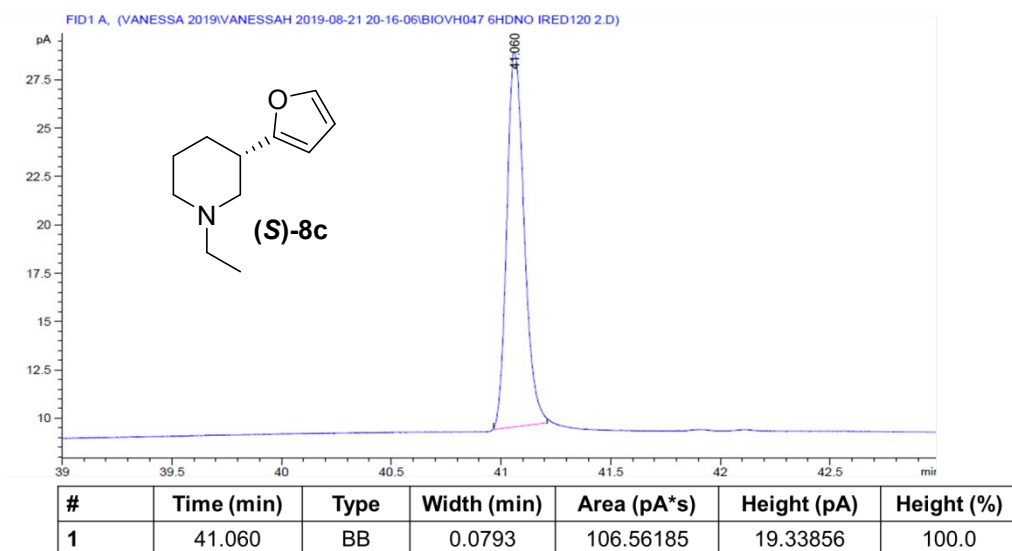

With EnelRED-06

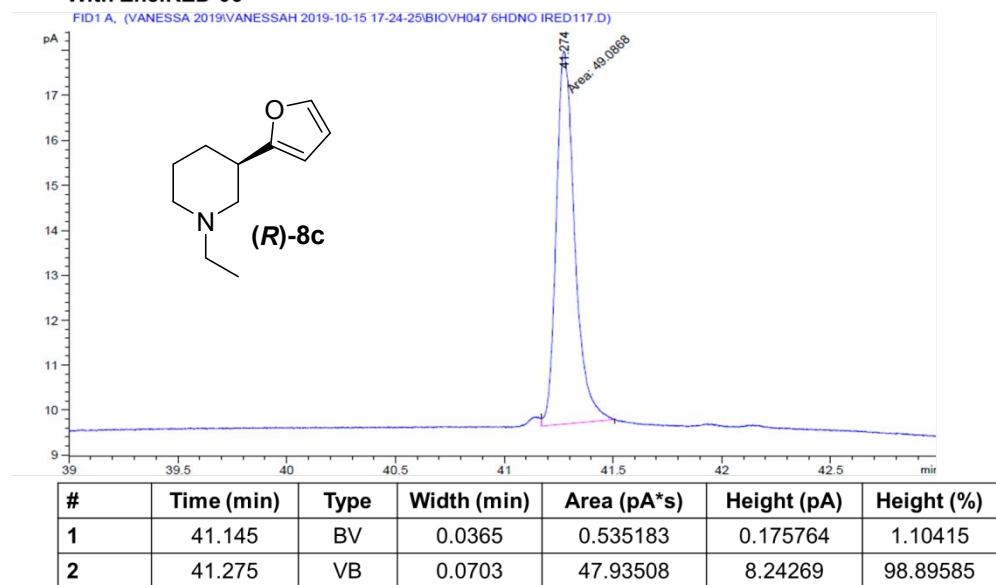

Figure S55: Chiral GC spectra for piperidine **8c**.

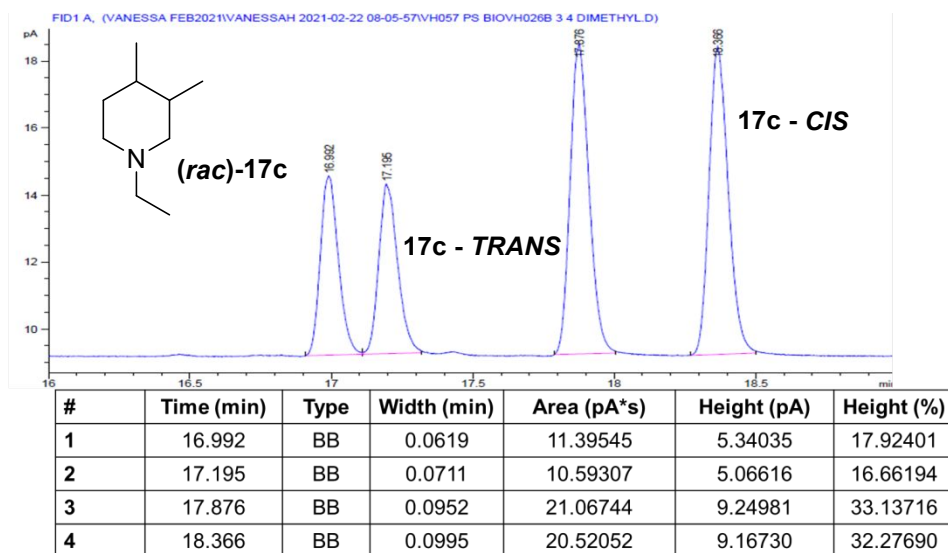

With EnelRED-01

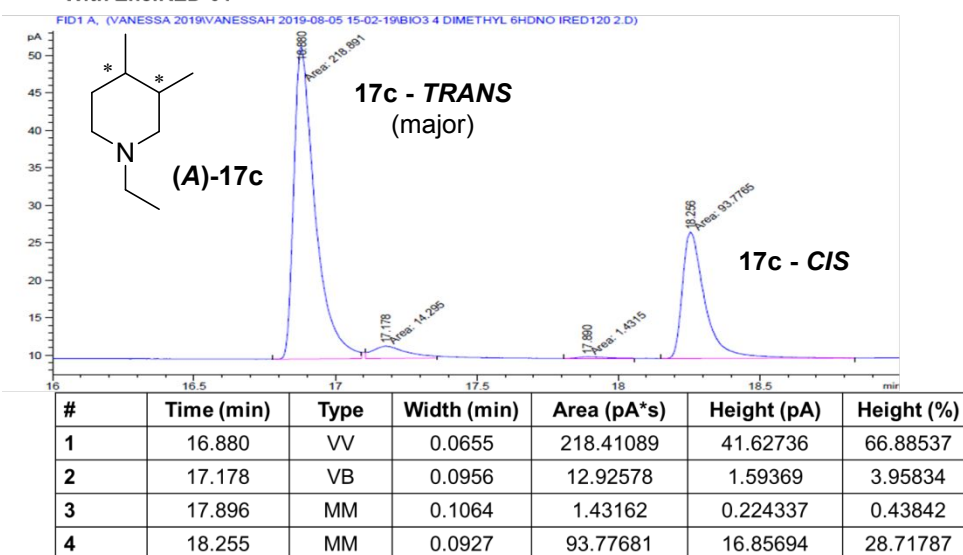

With EnelRED-06

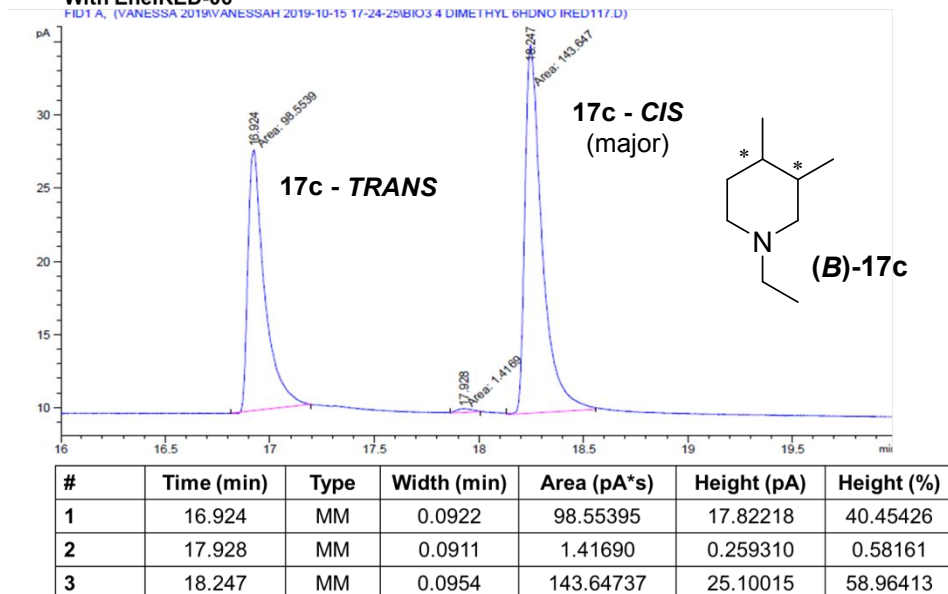

Figure S56: Chiral GC spectra for piperidine 17c.

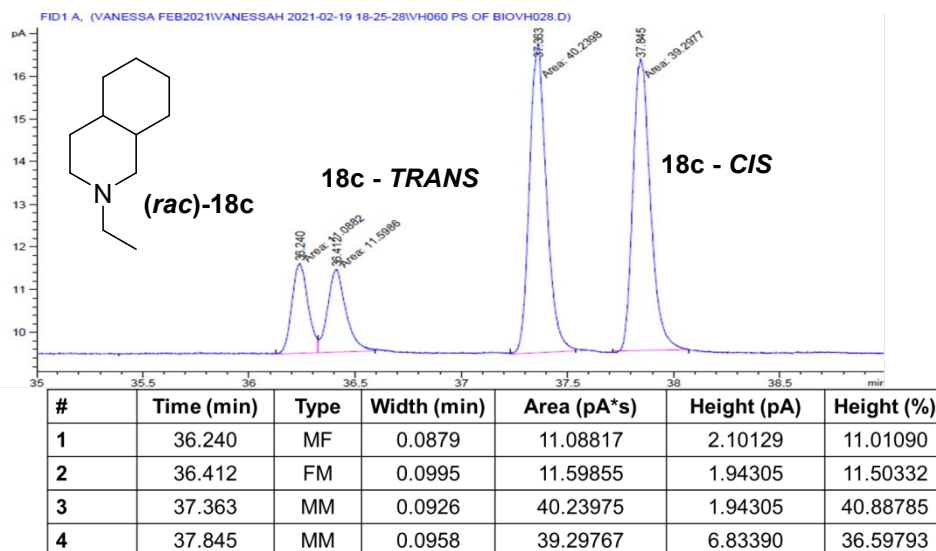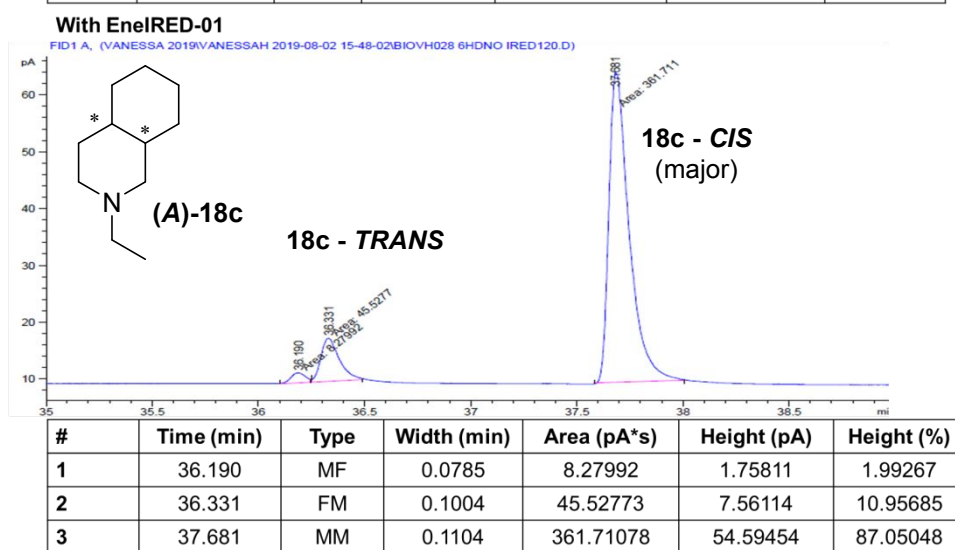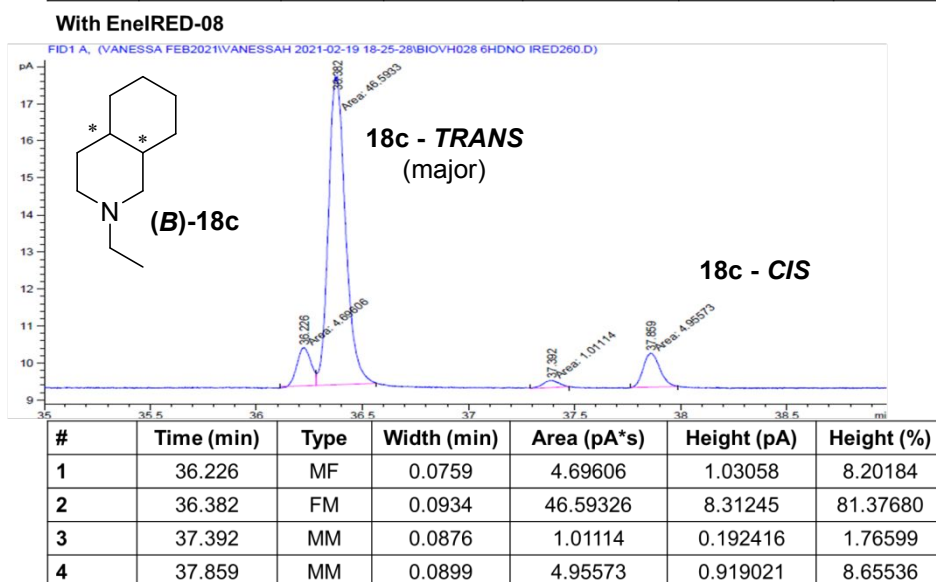

Figure S57: Chiral GC spectra for piperidine **18c**.

## 11. Chiral SFC Analysis: methods and retention times for piperidine products

**Table S13:** Chiral SFC analysis: methods and retention times of piperidine from biotransformations.

| Piperidine | Column       | Mobile phase                               | Piperidine retention time (min) |                |
|------------|--------------|--------------------------------------------|---------------------------------|----------------|
|            |              |                                            | T <sup>1</sup>                  | T <sup>2</sup> |
| <b>5c</b>  | CHIRALPAK®IG | 20% MeOH (0.1% TEA)/80%<br>CO <sub>2</sub> | 0.7 (S)                         | 1.1 (R)        |
| <b>11c</b> | CHIRALPAK®IG | 5% MeOH (0.1% TEA)/95%<br>CO <sub>2</sub>  | 3.1 (R)                         | 3.9 (S)        |

Absolute configurations were assigned by comparison with traces of commercial optically pure product derivatives (see **section 4**).

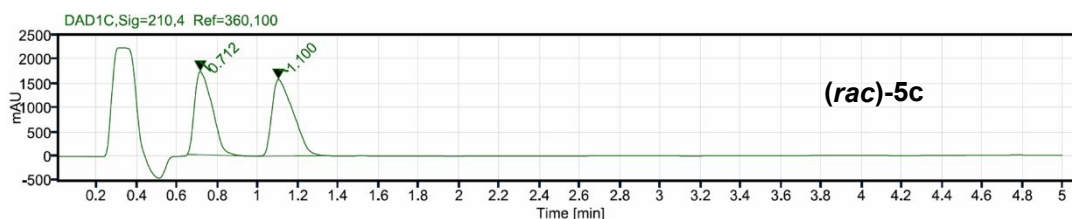

| # | Time (min) | Area      | Area (%) |
|---|------------|-----------|----------|
| 1 | 0.712      | 10459.275 | 47.45    |
| 2 | 1.100      | 11581.830 | 52.55    |

### With EnelRED-01

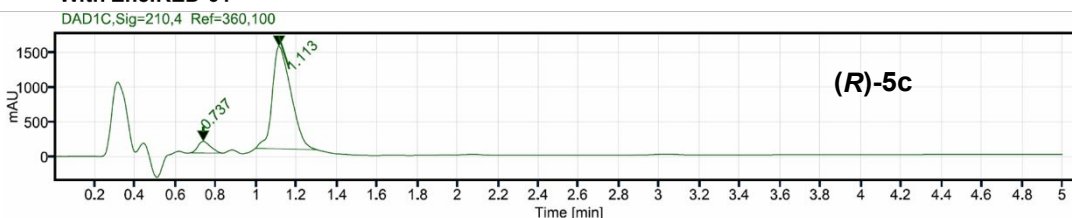

| # | Time (min) | Area     | Area (%) |
|---|------------|----------|----------|
| 1 | 0.737      | 728.123  | 7.07     |
| 2 | 1.113      | 9564.300 | 92.93    |

### With EnelRED-07

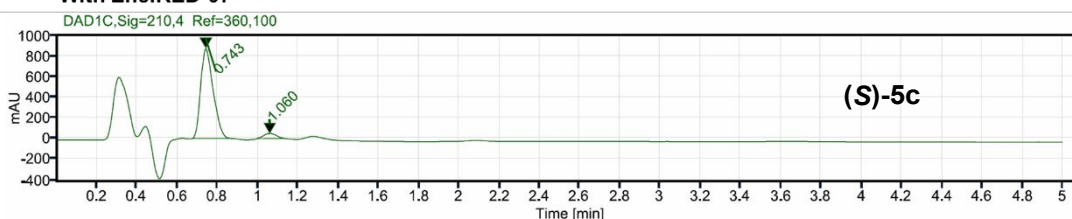

| # | Time (min) | Area     | Area (%) |
|---|------------|----------|----------|
| 1 | 0.743      | 3781.479 | 94.57    |
| 2 | 1.060      | 217.103  | 5.43     |

**Figure S58:** Chiral SFC spectra for piperidine **5c**.

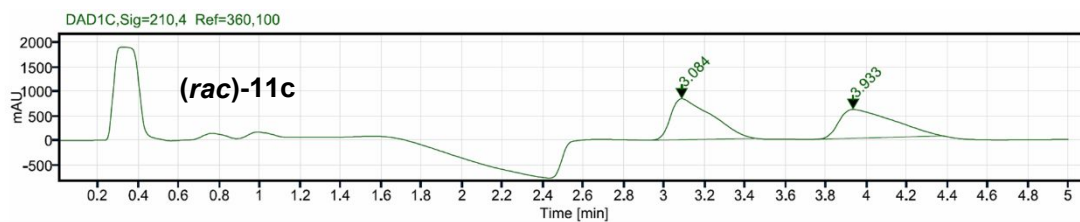

| # | Time (min) | Area     | Area (%) |
|---|------------|----------|----------|
| 1 | 3.084      | 1869.046 | 50.52    |
| 2 | 3.933      | 1830.440 | 49.48    |

**With EnelRED-01**

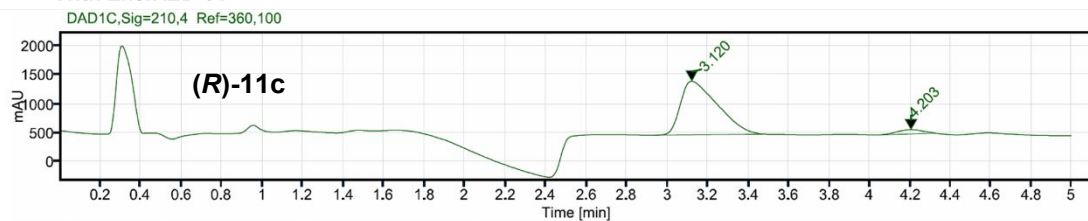

| # | Time (min) | Area      | Area (%) |
|---|------------|-----------|----------|
| 1 | 3.120      | 11627.768 | 94.96    |
| 2 | 4.203      | 616.789   | 5.04     |

**With EnelRED-07**

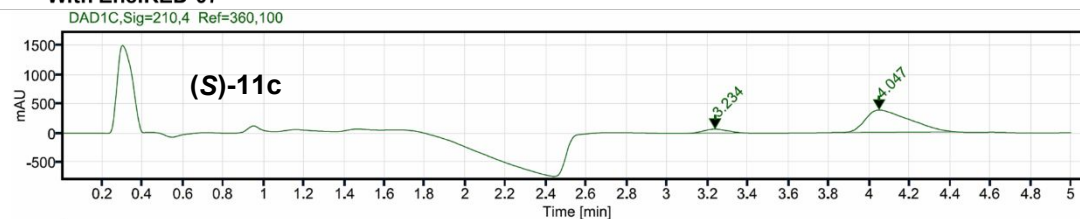

| # | Time (min) | Area     | Area (%) |
|---|------------|----------|----------|
| 1 | 3.234      | 515.131  | 8.30     |
| 2 | 4.047      | 5688.168 | 91.70    |

**Figure S59:** Chiral SFC spectra for piperidine **11c**.

## 12. VCD Analysis: methods for piperidine products

**VCD Measurements:** The Infrared (IR) and Vibrational Circular Dichroism (VCD) spectra were recorded using a ChiralIR™ VCD spectrometer equipped with the Dual PEM accessory (BioTools, Jupiter, Florida), with 4 cm<sup>-1</sup> resolution. A 100 – 200 μL solution containing 6 - 15mg of chiral molecule dissolved in CDCl<sub>3</sub> was transferred to a BaF<sub>2</sub> IR cell with path length of 100 μm. The samples were measured for 8 blocks of 1 hour each while purged with dry air to remove water vapor. The IR was processed by solvent subtraction and offset to zero at 2000 cm<sup>-1</sup>. The VCD blocks were averaged, then baseline corrected using either solvent or opposite enantiomer (if available) measured at the same concentration (then divided by 2) to produce the final spectrum.

**VCD Calculations:** Each chiral molecule (*R* configuration) was subjected to a conformer search (GMMX, MMF94) search using BioTools ComputeVOA software to find the lowest energy conformers in an 8 kcal/mol range. All conformers were minimized using Gaussian 09 at the 6-31G(d) / B3LYP and 6-31G(d) / B3PW91 level with CPCM solvent (chloroform) model. IR and VCD frequencies were calculated at the same level, then duplicates were removed. The lowest energy unique conformers (3 kcal / mol range) were then re-calculated at the cc-pVTZ / B3LYP and cc-pVTZ / B3PW91 level, and the resulting spectra from all four methods were Boltzmann averaged and plotted with a line width of 5 cm<sup>-1</sup>. IR and VCD spectra were then frequency scaled and compared to the experimental data. In cases where the *S* enantiomer was the only available experimental compound, calculated spectra (*R* enantiomer) were multiplied by -1 to produce *S* theoretical spectra for comparison.

## Analysis of piperidine **6c**

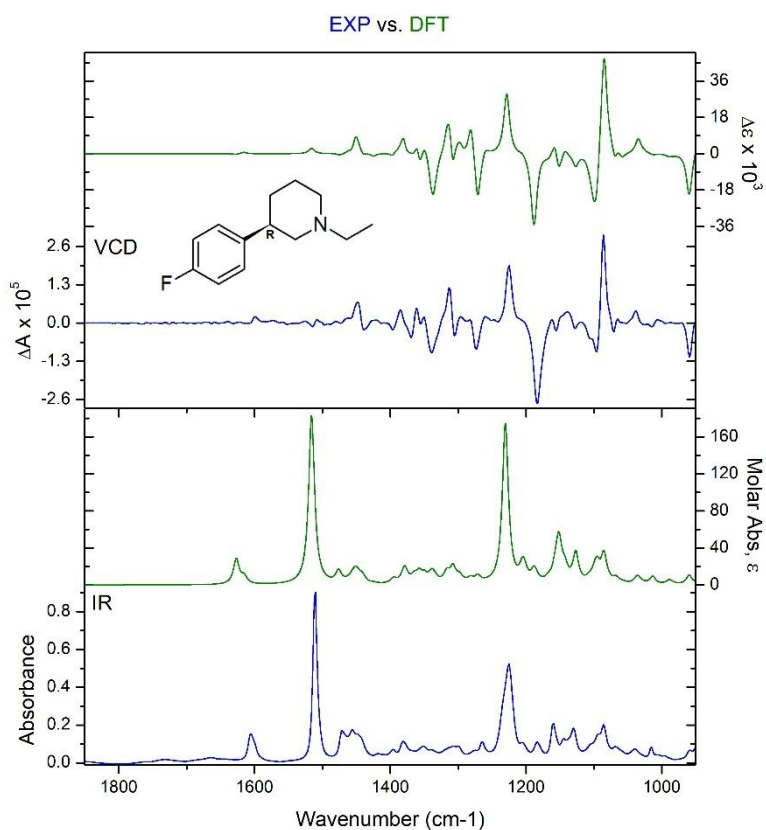

**Figure S60:** Experimental (blue) and calculated (green) VCD and IR spectra for piperidine (*R*)-**6c**, from the cascade reaction of 6-HDNO and EneIRED-01.

CompareVOA statistical data:

**6c** (*R*)-configuration

NS (IR) 91.1

NS (VCD – *R*) 82.6237

NS (VCD – *S*) 10.4038

ESI 72.220

Confidence Level 99%

DFT results for **6c** compound (5 conformers at 1% or greater Boltzmann weight)

\*There are no imaginary frequencies in any of the conformations

(*R*)-configuration calculated at cc-pVTZ / B3PW91 level

Conformer 1:

Energy = -660.801118 Hartree

Standard orientation:

```
-----
```

| Center | Atomic | Atomic | Coordinates (Angstroms) |           |           |
|--------|--------|--------|-------------------------|-----------|-----------|
| Number | Number | Type   | X                       | Y         | Z         |
| 1      | 6      | 0      | -0.713855               | 1.856003  | -0.028519 |
| 2      | 6      | 0      | -0.285718               | 0.477754  | 0.483562  |
| 3      | 6      | 0      | -1.175166               | -0.603971 | -0.137700 |
| 4      | 7      | 0      | -2.582907               | -0.367815 | 0.139914  |
| 5      | 6      | 0      | -3.009118               | 0.911720  | -0.408922 |
| 6      | 6      | 0      | -2.207986               | 2.060030  | 0.184143  |
| 7      | 6      | 0      | -3.400576               | -1.478950 | -0.330331 |
| 8      | 6      | 0      | -4.813770               | -1.482161 | 0.229637  |
| 9      | 6      | 0      | 2.015316                | -0.085508 | 1.342265  |
| 10     | 6      | 0      | 1.178872                | 0.188451  | 0.261292  |
| 11     | 6      | 0      | 1.740018                | 0.176402  | -1.017438 |
| 12     | 6      | 0      | 3.085488                | -0.100263 | -1.215740 |
| 13     | 6      | 0      | 3.875976                | -0.365705 | -0.113753 |
| 14     | 6      | 0      | 3.365338                | -0.362783 | 1.168832  |
| 15     | 9      | 0      | 5.184884                | -0.633649 | -0.297815 |
| 16     | 1      | 0      | -0.484852               | 1.932776  | -1.096854 |
| 17     | 1      | 0      | -0.138648               | 2.637628  | 0.473789  |
| 18     | 1      | 0      | -0.467770               | 0.452204  | 1.562618  |
| 19     | 1      | 0      | -0.901024               | -1.579085 | 0.272106  |
| 20     | 1      | 0      | -0.983559               | -0.648096 | -1.226877 |
| 21     | 1      | 0      | -2.901063               | 0.918498  | -1.511235 |
| 22     | 1      | 0      | -4.068512               | 1.054287  | -0.194013 |
| 23     | 1      | 0      | -2.533434               | 3.000576  | -0.266833 |
| 24     | 1      | 0      | -2.422575               | 2.125029  | 1.255230  |
| 25     | 1      | 0      | -3.438584               | -1.502502 | -1.434851 |
| 26     | 1      | 0      | -2.899986               | -2.399976 | -0.020909 |
| 27     | 1      | 0      | -5.403429               | -0.633129 | -0.118527 |
| 28     | 1      | 0      | -5.334479               | -2.388832 | -0.084226 |
| 29     | 1      | 0      | -4.794582               | -1.458973 | 1.320799  |
| 30     | 1      | 0      | 1.604996                | -0.082306 | 2.345625  |
| 31     | 1      | 0      | 1.122309                | 0.386845  | -1.882207 |
| 32     | 1      | 0      | 3.520154                | -0.109871 | -2.206818 |
| 33     | 1      | 0      | 4.012523                | -0.573642 | 2.010156  |

```
-----
```



-----  
Conformer 2:

Energy = -660.801057 Hartree

Standard orientation:

-----

| Center<br>Number | Atomic<br>Number | Atomic<br>Type | Coordinates (Angstroms) |           |           |
|------------------|------------------|----------------|-------------------------|-----------|-----------|
|                  |                  |                | X                       | Y         | Z         |
| 1                | 6                | 0              | 0.779424                | -1.967746 | 0.093250  |
| 2                | 6                | 0              | 0.392655                | -0.545081 | 0.506746  |
| 3                | 6                | 0              | 1.309267                | 0.466257  | -0.190112 |
| 4                | 7                | 0              | 2.711348                | 0.208380  | 0.097801  |
| 5                | 6                | 0              | 3.096561                | -1.118829 | -0.360090 |
| 6                | 6                | 0              | 2.268219                | -2.198434 | 0.317554  |
| 7                | 6                | 0              | 3.587949                | 1.233021  | -0.456016 |
| 8                | 6                | 0              | 3.478655                | 2.579780  | 0.240153  |
| 9                | 6                | 0              | -1.625253               | -0.286119 | -1.012193 |
| 10               | 6                | 0              | -1.064876               | -0.235391 | 0.265937  |
| 11               | 6                | 0              | -1.896401               | 0.116337  | 1.328049  |
| 12               | 6                | 0              | -3.240952               | 0.408257  | 1.136903  |
| 13               | 6                | 0              | -3.751031               | 0.346924  | -0.144419 |
| 14               | 6                | 0              | -2.965102               | 0.004053  | -1.228184 |
| 15               | 9                | 0              | -5.054710               | 0.627802  | -0.345406 |
| 16               | 1                | 0              | 0.544078                | -2.113161 | -0.966576 |
| 17               | 1                | 0              | 0.184563                | -2.695244 | 0.650890  |
| 18               | 1                | 0              | 0.578028                | -0.448723 | 1.581187  |
| 19               | 1                | 0              | 1.052793                | 1.469895  | 0.150722  |
| 20               | 1                | 0              | 1.120576                | 0.438846  | -1.280567 |
| 21               | 1                | 0              | 2.984503                | -1.208372 | -1.458131 |
| 22               | 1                | 0              | 4.156362                | -1.263058 | -0.137240 |
| 23               | 1                | 0              | 2.565472                | -3.178413 | -0.063503 |
| 24               | 1                | 0              | 2.484799                | -2.189636 | 1.390255  |
| 25               | 1                | 0              | 4.612621                | 0.867371  | -0.351377 |
| 26               | 1                | 0              | 3.413542                | 1.359965  | -1.540145 |
| 27               | 1                | 0              | 3.643826                | 2.471717  | 1.313725  |
| 28               | 1                | 0              | 4.232884                | 3.262965  | -0.154942 |
| 29               | 1                | 0              | 2.506205                | 3.050812  | 0.090965  |

|    |   |   |           |           |           |
|----|---|---|-----------|-----------|-----------|
| 30 | 1 | 0 | -1.011570 | -0.558673 | -1.862344 |
| 31 | 1 | 0 | -1.486911 | 0.163172  | 2.330650  |
| 32 | 1 | 0 | -3.884443 | 0.678865  | 1.963845  |
| 33 | 1 | 0 | -3.399058 | -0.035371 | -2.218836 |

-----

Conformer 3:

Energy = -660.799465 Hartree

Standard orientation:

-----

| Center<br>Number | Atomic<br>Number | Atomic<br>Type | Coordinates (Angstroms) |           |           |
|------------------|------------------|----------------|-------------------------|-----------|-----------|
|                  |                  |                | X                       | Y         | Z         |
| 1                | 6                | 0              | -0.800917               | 1.810750  | -0.534344 |
| 2                | 6                | 0              | -0.335516               | 0.700987  | 0.414806  |
| 3                | 6                | 0              | -1.266121               | -0.511605 | 0.285264  |
| 4                | 7                | 0              | -2.643355               | -0.134509 | 0.537524  |
| 5                | 6                | 0              | -3.120118               | 0.861137  | -0.406038 |
| 6                | 6                | 0              | -2.276546               | 2.124194  | -0.316350 |
| 7                | 6                | 0              | -3.545070               | -1.260297 | 0.731889  |
| 8                | 6                | 0              | -3.782279               | -2.185561 | -0.463530 |
| 9                | 6                | 0              | 2.014644                | 0.411551  | 1.276579  |
| 10               | 6                | 0              | 1.111204                | 0.319144  | 0.218754  |
| 11               | 6                | 0              | 1.589914                | -0.143921 | -1.008664 |
| 12               | 6                | 0              | 2.919533                | -0.503351 | -1.179636 |
| 13               | 6                | 0              | 3.778365                | -0.393741 | -0.102624 |
| 14               | 6                | 0              | 3.350362                | 0.059754  | 1.129048  |
| 15               | 9                | 0              | 5.072640                | -0.738617 | -0.260875 |
| 16               | 1                | 0              | -0.649338               | 1.488922  | -1.570404 |
| 17               | 1                | 0              | -0.189410               | 2.704993  | -0.390746 |
| 18               | 1                | 0              | -0.444781               | 1.071629  | 1.438832  |
| 19               | 1                | 0              | -0.976397               | -1.274298 | 1.013087  |
| 20               | 1                | 0              | -1.128210               | -0.955613 | -0.716912 |
| 21               | 1                | 0              | -3.098679               | 0.491211  | -1.447390 |
| 22               | 1                | 0              | -4.163573               | 1.085673  | -0.170321 |
| 23               | 1                | 0              | -2.623544               | 2.851084  | -1.054975 |
| 24               | 1                | 0              | -2.415448               | 2.573569  | 0.671652  |
| 25               | 1                | 0              | -3.154464               | -1.850334 | 1.566686  |

|    |   |   |           |           |           |
|----|---|---|-----------|-----------|-----------|
| 26 | 1 | 0 | -4.505414 | -0.852758 | 1.062485  |
| 27 | 1 | 0 | -2.859067 | -2.661186 | -0.799556 |
| 28 | 1 | 0 | -4.478196 | -2.979153 | -0.183284 |
| 29 | 1 | 0 | -4.216170 | -1.651460 | -1.310668 |
| 30 | 1 | 0 | 1.669107  | 0.767808  | 2.240385  |
| 31 | 1 | 0 | 0.919181  | -0.228025 | -1.855074 |
| 32 | 1 | 0 | 3.289929  | -0.861917 | -2.131244 |
| 33 | 1 | 0 | 4.049476  | 0.134718  | 1.951736  |

-----

Conformer 4:

Energy = -660.797848 Hartree

Standard orientation:

-----

| Center<br>Number | Atomic<br>Number | Atomic<br>Type | Coordinates (Angstroms) |           |           |
|------------------|------------------|----------------|-------------------------|-----------|-----------|
|                  |                  |                | X                       | Y         | Z         |
| 1                | 6                | 0              | -0.774267               | -2.190187 | 0.449013  |
| 2                | 6                | 0              | -0.300484               | -1.319592 | -0.727855 |
| 3                | 6                | 0              | -1.468328               | -0.466011 | -1.228753 |
| 4                | 7                | 0              | -2.127984               | 0.306140  | -0.183221 |
| 5                | 6                | 0              | -2.618033               | -0.557597 | 0.881268  |
| 6                | 6                | 0              | -1.485806               | -1.358927 | 1.504754  |
| 7                | 6                | 0              | -3.175534               | 1.142590  | -0.754713 |
| 8                | 6                | 0              | -3.709653               | 2.205414  | 0.191258  |
| 9                | 6                | 0              | 2.198253                | -1.203599 | -0.584164 |
| 10               | 6                | 0              | 0.971652                | -0.557908 | -0.412109 |
| 11               | 6                | 0              | 0.988696                | 0.757979  | 0.050470  |
| 12               | 6                | 0              | 2.183516                | 1.409544  | 0.334067  |
| 13               | 6                | 0              | 3.370793                | 0.729192  | 0.154673  |
| 14               | 6                | 0              | 3.402377                | -0.573947 | -0.303466 |
| 15               | 9                | 0              | 4.535022                | 1.354477  | 0.429585  |
| 16               | 1                | 0              | 0.070131                | -2.733428 | 0.878867  |
| 17               | 1                | 0              | -1.470708               | -2.940969 | 0.059604  |
| 18               | 1                | 0              | -0.050238               | -1.997563 | -1.549436 |
| 19               | 1                | 0              | -2.190857               | -1.143685 | -1.722679 |
| 20               | 1                | 0              | -1.115581               | 0.229965  | -1.994134 |
| 21               | 1                | 0              | -3.389524               | -1.253726 | 0.496198  |

|    |   |   |           |           |           |
|----|---|---|-----------|-----------|-----------|
| 22 | 1 | 0 | -3.098073 | 0.058206  | 1.642201  |
| 23 | 1 | 0 | -1.888396 | -2.004959 | 2.288596  |
| 24 | 1 | 0 | -0.782180 | -0.673260 | 1.985096  |
| 25 | 1 | 0 | -2.748898 | 1.636654  | -1.631543 |
| 26 | 1 | 0 | -4.012745 | 0.522968  | -1.126154 |
| 27 | 1 | 0 | -2.898694 | 2.829573  | 0.571082  |
| 28 | 1 | 0 | -4.240149 | 1.779573  | 1.043686  |
| 29 | 1 | 0 | -4.413949 | 2.848789  | -0.339414 |
| 30 | 1 | 0 | 2.215891  | -2.223412 | -0.952972 |
| 31 | 1 | 0 | 0.049016  | 1.275620  | 0.192126  |
| 32 | 1 | 0 | 2.195935  | 2.431584  | 0.690561  |
| 33 | 1 | 0 | 4.350612  | -1.076908 | -0.442053 |

-----

Conformer 5:

Energy = -660.797728 Hartree

Standard orientation:

-----

| Center<br>Number | Atomic<br>Number | Atomic<br>Type | Coordinates (Angstroms) |           |           |
|------------------|------------------|----------------|-------------------------|-----------|-----------|
|                  |                  |                | X                       | Y         | Z         |
| 1                | 6                | 0              | -0.869772               | -2.263711 | 0.012469  |
| 2                | 6                | 0              | -0.453840               | -1.100569 | -0.904074 |
| 3                | 6                | 0              | -1.626312               | -0.126733 | -1.061158 |
| 4                | 7                | 0              | -2.196421               | 0.321185  | 0.203224  |
| 5                | 6                | 0              | -2.635819               | -0.808782 | 1.011211  |
| 6                | 6                | 0              | -1.486937               | -1.758125 | 1.307312  |
| 7                | 6                | 0              | -3.283111               | 1.271670  | 0.004739  |
| 8                | 6                | 0              | -2.839483               | 2.626331  | -0.523143 |
| 9                | 6                | 0              | 0.950248                | 0.642175  | 0.350221  |
| 10               | 6                | 0              | 0.860128                | -0.471392 | -0.485264 |
| 11               | 6                | 0              | 2.050566                | -1.036443 | -0.948226 |
| 12               | 6                | 0              | 3.290180                | -0.523007 | -0.594985 |
| 13               | 6                | 0              | 3.331300                | 0.580512  | 0.235494  |
| 14               | 6                | 0              | 2.181416                | 1.175569  | 0.713580  |
| 15               | 9                | 0              | 4.530454                | 1.092486  | 0.584409  |
| 16               | 1                | 0              | -0.013487               | -2.912017 | 0.210678  |
| 17               | 1                | 0              | -1.611256               | -2.869231 | -0.520018 |

|    |   |   |           |           |           |
|----|---|---|-----------|-----------|-----------|
| 18 | 1 | 0 | -0.282111 | -1.521324 | -1.899375 |
| 19 | 1 | 0 | -2.402314 | -0.628856 | -1.670918 |
| 20 | 1 | 0 | -1.294546 | 0.744143  | -1.627836 |
| 21 | 1 | 0 | -3.445723 | -1.367345 | 0.502050  |
| 22 | 1 | 0 | -3.056198 | -0.418238 | 1.940973  |
| 23 | 1 | 0 | -0.735567 | -1.239551 | 1.909229  |
| 24 | 1 | 0 | -1.853628 | -2.595865 | 1.905269  |
| 25 | 1 | 0 | -4.055005 | 0.848753  | -0.664731 |
| 26 | 1 | 0 | -3.764337 | 1.414582  | 0.975581  |
| 27 | 1 | 0 | -2.432333 | 2.569744  | -1.533272 |
| 28 | 1 | 0 | -2.080716 | 3.066281  | 0.126468  |
| 29 | 1 | 0 | -3.693661 | 3.305251  | -0.556389 |
| 30 | 1 | 0 | 0.039089  | 1.094656  | 0.719079  |
| 31 | 1 | 0 | 2.010585  | -1.896769 | -1.607462 |
| 32 | 1 | 0 | 4.209907  | -0.961583 | -0.959795 |
| 33 | 1 | 0 | 2.250788  | 2.041720  | 1.359165  |

---

## Analysis of piperidine **7c**

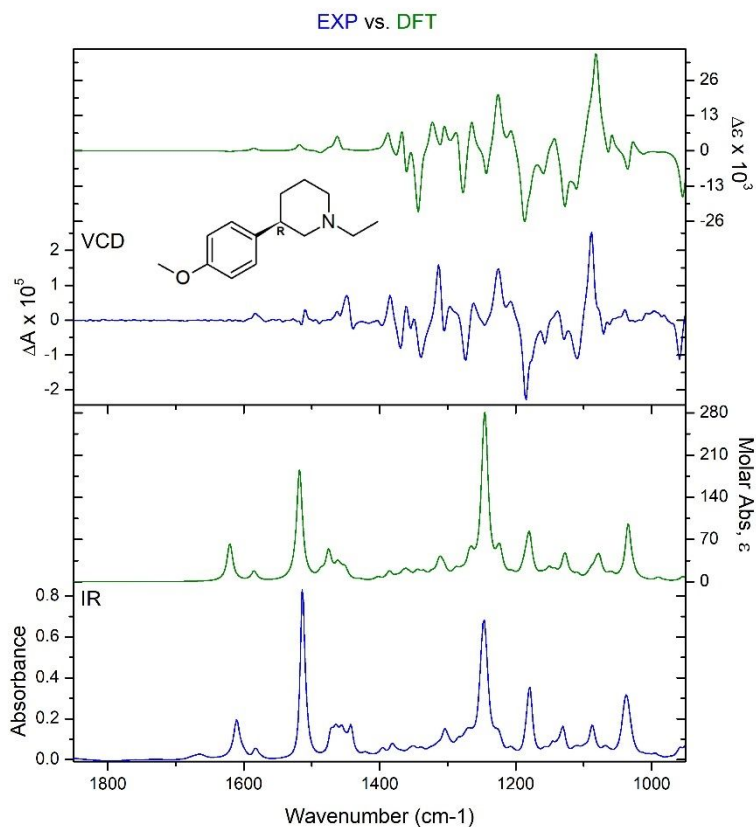

**Figure S61:** Experimental (blue) and calculated (green) VCD and IR spectra for piperidine (*R*)-**7c**, from the cascade reaction of 6-HDNO and EneIRED-01.

CompareVOA statistical data:

**7c** (*R*)-configuration

NS (IR) 92.5

NS (VCD – *R*) 84.2007

NS (VCD – *S*) 9.12698

ESI 75.074

Confidence Level 99%

DFT results for **7c** compound (6 conformers at 1% or greater Boltzmann weight)

\*There are no imaginary frequencies in any of the conformations

(*R*)-configuration calculated at cc-pVTZ / B3LYP level

Conformer 1:

Energy = -676.346542 Hartree

Standard orientation:

---

| Center | Atomic | Atomic | Coordinates (Angstroms) |           |           |
|--------|--------|--------|-------------------------|-----------|-----------|
| Number | Number | Type   | X                       | Y         | Z         |
| 1      | 6      | 0      | 1.216499                | 1.881854  | -0.062651 |
| 2      | 6      | 0      | 0.717310                | 0.488740  | -0.480190 |
| 3      | 6      | 0      | 1.588282                | -0.594744 | 0.177512  |
| 4      | 7      | 0      | 3.004164                | -0.427142 | -0.144988 |
| 5      | 6      | 0      | 3.494380                | 0.871022  | 0.317172  |
| 6      | 6      | 0      | 2.716286                | 2.016243  | -0.323658 |
| 7      | 6      | 0      | 3.798686                | -1.545349 | 0.364812  |
| 8      | 6      | 0      | 5.195621                | -1.636405 | -0.240897 |
| 9      | 6      | 0      | -1.287475               | 0.342946  | 1.090700  |
| 10     | 6      | 0      | -0.755242               | 0.270177  | -0.203441 |
| 11     | 6      | 0      | -1.638490               | -0.022265 | -1.238501 |
| 12     | 6      | 0      | -2.998377               | -0.236127 | -1.016750 |
| 13     | 6      | 0      | -3.503191               | -0.160904 | 0.279009  |
| 14     | 6      | 0      | -2.633660               | 0.131570  | 1.333511  |
| 15     | 8      | 0      | -4.810913               | -0.352505 | 0.615413  |
| 16     | 6      | 0      | -5.739062               | -0.649843 | -0.420919 |
| 17     | 1      | 0      | 1.019510                | 2.034408  | 1.002679  |
| 18     | 1      | 0      | 0.659578                | 2.652775  | -0.598996 |
| 19     | 1      | 0      | 0.866113                | 0.395536  | -1.559495 |
| 20     | 1      | 0      | 1.270014                | -1.577039 | -0.175395 |
| 21     | 1      | 0      | 1.425210                | -0.578207 | 1.270374  |
| 22     | 1      | 0      | 3.417235                | 0.946105  | 1.418410  |
| 23     | 1      | 0      | 4.550209                | 0.960658  | 0.066569  |
| 24     | 1      | 0      | 2.905089                | 2.012583  | -1.400574 |
| 25     | 1      | 0      | 3.087400                | 2.967006  | 0.064590  |
| 26     | 1      | 0      | 3.874880                | -1.506172 | 1.465819  |
| 27     | 1      | 0      | 3.255230                | -2.461423 | 0.126268  |
| 28     | 1      | 0      | 5.825138                | -0.790847 | 0.035251  |
| 29     | 1      | 0      | 5.692923                | -2.541258 | 0.111372  |
| 30     | 1      | 0      | 5.139164                | -1.677852 | -1.329408 |
| 31     | 1      | 0      | -0.641158               | 0.569090  | 1.928761  |
| 32     | 1      | 0      | -1.263338               | -0.086837 | -2.252646 |
| 33     | 1      | 0      | -3.642355               | -0.458164 | -1.854019 |

|    |   |   |           |           |           |
|----|---|---|-----------|-----------|-----------|
| 34 | 1 | 0 | -3.033041 | 0.189723  | 2.337045  |
| 35 | 1 | 0 | -6.704689 | -0.761164 | 0.064166  |
| 36 | 1 | 0 | -5.792732 | 0.160136  | -1.151817 |
| 37 | 1 | 0 | -5.481634 | -1.580527 | -0.931599 |

-----

Conformer 2:

Energy = -676.346520 Hartree

Standard orientation:

-----

| Center<br>Number | Atomic<br>Number | Atomic<br>Type | Coordinates (Angstroms) |           |           |
|------------------|------------------|----------------|-------------------------|-----------|-----------|
|                  |                  |                | X                       | Y         | Z         |
| 1                | 6                | 0              | -1.181770               | 1.871837  | -0.176960 |
| 2                | 6                | 0              | -0.739311               | 0.560284  | 0.491471  |
| 3                | 6                | 0              | -1.565503               | -0.610579 | -0.066012 |
| 4                | 7                | 0              | -3.001163               | -0.395575 | 0.105233  |
| 5                | 6                | 0              | -3.434426               | 0.815915  | -0.590190 |
| 6                | 6                | 0              | -2.696465               | 2.046174  | -0.070579 |
| 7                | 6                | 0              | -3.763919               | -1.579570 | -0.291731 |
| 8                | 6                | 0              | -5.208888               | -1.575647 | 0.196566  |
| 9                | 6                | 0              | 1.399737                | 0.195995  | -0.844091 |
| 10               | 6                | 0              | 0.748638                | 0.299095  | 0.384318  |
| 11               | 6                | 0              | 1.527310                | 0.139360  | 1.535362  |
| 12               | 6                | 0              | 2.888410                | -0.109842 | 1.467115  |
| 13               | 6                | 0              | 3.520963                | -0.210793 | 0.226561  |
| 14               | 6                | 0              | 2.766798                | -0.055993 | -0.935734 |
| 15               | 8                | 0              | 4.861901                | -0.458587 | 0.253407  |
| 16               | 6                | 0              | 5.554867                | -0.572674 | -0.983795 |
| 17               | 1                | 0              | -0.892608               | 1.857392  | -1.231947 |
| 18               | 1                | 0              | -0.662310               | 2.716530  | 0.279967  |
| 19               | 1                | 0              | -0.982860               | 0.634220  | 1.554914  |
| 20               | 1                | 0              | -1.291336               | -1.528031 | 0.457313  |
| 21               | 1                | 0              | -1.309215               | -0.759680 | -1.130691 |
| 22               | 1                | 0              | -3.266423               | 0.719731  | -1.679738 |
| 23               | 1                | 0              | -4.505945               | 0.943721  | -0.444837 |
| 24               | 1                | 0              | -3.019393               | 2.924986  | -0.632519 |
| 25               | 1                | 0              | -2.975927               | 2.211118  | 0.973392  |



|    |   |   |           |           |           |
|----|---|---|-----------|-----------|-----------|
| 26 | 1 | 0 | -3.744466 | -1.712823 | -1.387804 |
| 27 | 1 | 0 | -3.255279 | -2.446999 | 0.132747  |
| 28 | 1 | 0 | -5.802190 | -0.785817 | -0.263611 |
| 29 | 1 | 0 | -5.684968 | -2.525813 | -0.049908 |
| 30 | 1 | 0 | -5.247323 | -1.443909 | 1.278745  |
| 31 | 1 | 0 | 0.841044  | 0.312552  | -1.763710 |
| 32 | 1 | 0 | 1.056286  | 0.212863  | 2.508016  |
| 33 | 1 | 0 | 3.478132  | -0.229398 | 2.365890  |
| 34 | 1 | 0 | 3.225780  | -0.127873 | -1.909971 |
| 35 | 1 | 0 | 6.592406  | -0.769638 | -0.729030 |
| 36 | 1 | 0 | 5.166858  | -1.399156 | -1.583425 |
| 37 | 1 | 0 | 5.494025  | 0.352367  | -1.561489 |

-----

Conformer 3:

Energy = -646.346450 Hartree

Standard orientation:

-----

| Center<br>Number | Atomic<br>Number | Atomic<br>Type | Coordinates (Angstroms) |           |           |
|------------------|------------------|----------------|-------------------------|-----------|-----------|
|                  |                  |                | X                       | Y         | Z         |
| 1                | 6                | 0              | -1.297921               | -1.983706 | -0.175153 |
| 2                | 6                | 0              | -0.822854               | -0.559334 | -0.505368 |
| 3                | 6                | 0              | -1.711177               | 0.469126  | 0.216009  |
| 4                | 7                | 0              | -3.124300               | 0.295143  | -0.115420 |
| 5                | 6                | 0              | -3.589555               | -1.036246 | 0.270650  |
| 6                | 6                | 0              | -2.796442               | -2.127389 | -0.441149 |
| 7                | 6                | 0              | -3.967838               | 1.344870  | 0.457520  |
| 8                | 6                | 0              | -3.786292               | 2.709587  | -0.198975 |
| 9                | 6                | 0              | 1.181268                | -0.483702 | 1.071688  |
| 10               | 6                | 0              | 0.646098                | -0.334103 | -0.214553 |
| 11               | 6                | 0              | 1.523046                | 0.041095  | -1.228146 |
| 12               | 6                | 0              | 2.879631                | 0.261736  | -0.993242 |
| 13               | 6                | 0              | 3.387624                | 0.108076  | 0.294280  |
| 14               | 6                | 0              | 2.524284                | -0.267342 | 1.327425  |
| 15               | 8                | 0              | 4.692725                | 0.297282  | 0.642025  |
| 16               | 6                | 0              | 5.614102                | 0.680271  | -0.371999 |
| 17               | 1                | 0              | -1.095798               | -2.199724 | 0.878159  |

|    |   |   |           |           |           |
|----|---|---|-----------|-----------|-----------|
| 18 | 1 | 0 | -0.730072 | -2.710377 | -0.759634 |
| 19 | 1 | 0 | -0.972323 | -0.402438 | -1.577123 |
| 20 | 1 | 0 | -1.397978 | 1.470743  | -0.074976 |
| 21 | 1 | 0 | -1.553576 | 0.387665  | 1.307024  |
| 22 | 1 | 0 | -3.509705 | -1.182250 | 1.364295  |
| 23 | 1 | 0 | -4.647566 | -1.116020 | 0.016137  |
| 24 | 1 | 0 | -3.150095 | -3.106498 | -0.111441 |
| 25 | 1 | 0 | -2.988487 | -2.060086 | -1.515394 |
| 26 | 1 | 0 | -5.004665 | 1.030446  | 0.325491  |
| 27 | 1 | 0 | -3.805346 | 1.433243  | 1.546143  |
| 28 | 1 | 0 | -3.942324 | 2.639181  | -1.276223 |
| 29 | 1 | 0 | -4.512258 | 3.415246  | 0.207553  |
| 30 | 1 | 0 | -2.794821 | 3.126905  | -0.025047 |
| 31 | 1 | 0 | 0.540136  | -0.775298 | 1.893326  |
| 32 | 1 | 0 | 1.145390  | 0.166615  | -2.235664 |
| 33 | 1 | 0 | 3.518566  | 0.549173  | -1.814271 |
| 34 | 1 | 0 | 2.926006  | -0.385295 | 2.324764  |
| 35 | 1 | 0 | 6.578358  | 0.775120  | 0.119281  |
| 36 | 1 | 0 | 5.681031  | -0.077111 | -1.156292 |
| 37 | 1 | 0 | 5.339987  | 1.638875  | -0.818289 |

-----

Conformer 4:

Energy = -676.346448 Hartree

Standard orientation:

-----

| Center<br>Number | Atomic<br>Number | Atomic<br>Type | Coordinates (Angstroms) |           |           |
|------------------|------------------|----------------|-------------------------|-----------|-----------|
|                  |                  |                | X                       | Y         | Z         |
| 1                | 6                | 0              | 1.249610                | -1.987602 | 0.024208  |
| 2                | 6                | 0              | 0.844411                | -0.593190 | 0.528805  |
| 3                | 6                | 0              | 1.689255                | 0.482720  | -0.175375 |
| 4                | 7                | 0              | 3.121283                | 0.254152  | 0.007835  |
| 5                | 6                | 0              | 3.516110                | -1.043272 | -0.539354 |
| 6                | 6                | 0              | 2.761587                | -2.182899 | 0.137430  |
| 7                | 6                | 0              | 3.937506                | 1.337554  | -0.541648 |
| 8                | 6                | 0              | 3.849011                | 2.639797  | 0.247224  |
| 9                | 6                | 0              | -1.295122               | -0.327020 | -0.828120 |

|    |   |   |           |           |           |
|----|---|---|-----------|-----------|-----------|
| 10 | 6 | 0 | -0.639432 | -0.317623 | 0.402228  |
| 11 | 6 | 0 | -1.410366 | -0.035348 | 1.534704  |
| 12 | 6 | 0 | -2.768556 | 0.223529  | 1.447036  |
| 13 | 6 | 0 | -3.405779 | 0.209966  | 0.204871  |
| 14 | 6 | 0 | -2.659181 | -0.067294 | -0.939355 |
| 15 | 8 | 0 | -4.743727 | 0.474930  | 0.212052  |
| 16 | 6 | 0 | -5.443447 | 0.463990  | -1.026555 |
| 17 | 1 | 0 | 0.717139  | -2.756876 | 0.587001  |
| 18 | 1 | 0 | 0.947305  | -2.096234 | -1.021672 |
| 19 | 1 | 0 | 1.097751  | -0.540857 | 1.591230  |
| 20 | 1 | 0 | 1.432094  | 0.503875  | -1.250331 |
| 21 | 1 | 0 | 1.429313  | 1.458444  | 0.232336  |
| 22 | 1 | 0 | 4.590128  | -1.164573 | -0.389817 |
| 23 | 1 | 0 | 3.336724  | -1.084596 | -1.630138 |
| 24 | 1 | 0 | 3.058620  | -3.132417 | -0.312559 |
| 25 | 1 | 0 | 3.050080  | -2.220434 | 1.191257  |
| 26 | 1 | 0 | 4.973669  | 0.994491  | -0.531523 |
| 27 | 1 | 0 | 3.682983  | 1.527423  | -1.599298 |
| 28 | 1 | 0 | 4.097011  | 2.470087  | 1.295787  |
| 29 | 1 | 0 | 4.554677  | 3.366226  | -0.158499 |
| 30 | 1 | 0 | 2.857432  | 3.089368  | 0.200562  |
| 31 | 1 | 0 | -0.742805 | -0.542561 | -1.733550 |
| 32 | 1 | 0 | -0.935974 | -0.019718 | 2.508315  |
| 33 | 1 | 0 | -3.352641 | 0.438174  | 2.331704  |
| 34 | 1 | 0 | -3.121889 | -0.085483 | -1.914301 |
| 35 | 1 | 0 | -5.056389 | 1.222768  | -1.710427 |
| 36 | 1 | 0 | -5.389261 | -0.515922 | -1.506155 |
| 37 | 1 | 0 | -6.478763 | 0.690456  | -0.787775 |

-----

Conformer 5:

Energy = -676.344849 Hartree

Standard orientation:

-----

| Center<br>Number | Atomic<br>Number | Atomic<br>Type | Coordinates (Angstroms) |          |          |
|------------------|------------------|----------------|-------------------------|----------|----------|
|                  |                  |                | X                       | Y        | Z        |
| 1                | 6                | 0              | 1.298309                | 1.841397 | 0.488978 |

-----

|    |   |   |           |           |           |
|----|---|---|-----------|-----------|-----------|
| 2  | 6 | 0 | 0.766786  | 0.708977  | -0.406671 |
| 3  | 6 | 0 | 1.671922  | -0.528475 | -0.267465 |
| 4  | 7 | 0 | 3.058831  | -0.199143 | -0.573572 |
| 5  | 6 | 0 | 3.596534  | 0.821052  | 0.319924  |
| 6  | 6 | 0 | 2.779673  | 2.106720  | 0.215432  |
| 7  | 6 | 0 | 3.926118  | -1.360394 | -0.761013 |
| 8  | 6 | 0 | 4.181834  | -2.255682 | 0.460169  |
| 9  | 6 | 0 | -1.151936 | -0.041197 | 1.099788  |
| 10 | 6 | 0 | -0.688843 | 0.378507  | -0.154520 |
| 11 | 6 | 0 | -1.627025 | 0.474486  | -1.178320 |
| 12 | 6 | 0 | -2.974165 | 0.171929  | -0.983513 |
| 13 | 6 | 0 | -3.409658 | -0.244403 | 0.272048  |
| 14 | 6 | 0 | -2.484417 | -0.348747 | 1.314435  |
| 15 | 8 | 0 | -4.698807 | -0.566185 | 0.580141  |
| 16 | 6 | 0 | -5.682274 | -0.474895 | -0.443500 |
| 17 | 1 | 0 | 1.169237  | 1.564229  | 1.539648  |
| 18 | 1 | 0 | 0.709507  | 2.747011  | 0.329547  |
| 19 | 1 | 0 | 0.853133  | 1.042128  | -1.444466 |
| 20 | 1 | 0 | 1.340140  | -1.302021 | -0.963110 |
| 21 | 1 | 0 | 1.555325  | -0.939922 | 0.749267  |
| 22 | 1 | 0 | 3.603863  | 0.488850  | 1.372824  |
| 23 | 1 | 0 | 4.634578  | 1.010018  | 0.039125  |
| 24 | 1 | 0 | 3.168870  | 2.845499  | 0.919287  |
| 25 | 1 | 0 | 2.899678  | 2.520873  | -0.789155 |
| 26 | 1 | 0 | 3.489993  | -1.966346 | -1.559292 |
| 27 | 1 | 0 | 4.884252  | -0.992210 | -1.136765 |
| 28 | 1 | 0 | 3.258808  | -2.690686 | 0.845152  |
| 29 | 1 | 0 | 4.842830  | -3.078018 | 0.180819  |
| 30 | 1 | 0 | 4.662166  | -1.707552 | 1.271310  |
| 31 | 1 | 0 | -0.462460 | -0.130333 | 1.929106  |
| 32 | 1 | 0 | -1.306142 | 0.795748  | -2.161832 |
| 33 | 1 | 0 | -3.661634 | 0.265298  | -1.810317 |
| 34 | 1 | 0 | -2.830381 | -0.671456 | 2.287169  |
| 35 | 1 | 0 | -6.621722 | -0.768458 | 0.016322  |
| 36 | 1 | 0 | -5.769219 | 0.545712  | -0.822983 |
| 37 | 1 | 0 | -5.459316 | -1.150528 | -1.272410 |

---

Conformer 6:

Energy = -676.344822 Hartree

Standard orientation:

---

| Center<br>Number | Atomic<br>Number | Atomic<br>Type | Coordinates (Angstroms) |           |           |
|------------------|------------------|----------------|-------------------------|-----------|-----------|
|                  |                  |                | X                       | Y         | Z         |
| 1                | 6                | 0              | 1.276885                | -1.750962 | -0.754880 |
| 2                | 6                | 0              | 0.798837                | -0.806159 | 0.360785  |
| 3                | 6                | 0              | 1.656732                | 0.472200  | 0.356667  |
| 4                | 7                | 0              | 3.073419                | 0.153612  | 0.485966  |
| 5                | 6                | 0              | 3.555123                | -0.683390 | -0.607379 |
| 6                | 6                | 0              | 2.782596                | -1.999751 | -0.652688 |
| 7                | 6                | 0              | 3.923089                | 1.304076  | 0.788311  |
| 8                | 6                | 0              | 4.045063                | 2.393653  | -0.286865 |
| 9                | 6                | 0              | -1.268561               | 0.095389  | -0.825238 |
| 10               | 6                | 0              | -0.681179               | -0.493340 | 0.293729  |
| 11               | 6                | 0              | -1.517795               | -0.778337 | 1.378127  |
| 12               | 6                | 0              | -2.873043               | -0.492756 | 1.349453  |
| 13               | 6                | 0              | -3.440973               | 0.098757  | 0.219408  |
| 14               | 6                | 0              | -2.628502               | 0.393829  | -0.874259 |
| 15               | 8                | 0              | -4.781183               | 0.345523  | 0.279013  |
| 16               | 6                | 0              | -5.408935               | 0.956792  | -0.841715 |
| 17               | 1                | 0              | 1.049716                | -1.306992 | -1.728898 |
| 18               | 1                | 0              | 0.727353                | -2.693119 | -0.704273 |
| 19               | 1                | 0              | 0.986599                | -1.303895 | 1.315999  |
| 20               | 1                | 0              | 1.368554                | 1.107040  | 1.197091  |
| 21               | 1                | 0              | 1.438609                | 1.039703  | -0.563797 |
| 22               | 1                | 0              | 3.460070                | -0.181985 | -1.586343 |
| 23               | 1                | 0              | 4.618402                | -0.875179 | -0.449979 |
| 24               | 1                | 0              | 3.000419                | -2.568856 | 0.254913  |
| 25               | 1                | 0              | 3.126749                | -2.596616 | -1.500095 |
| 26               | 1                | 0              | 3.543906                | 1.755278  | 1.708755  |
| 27               | 1                | 0              | 4.920377                | 0.919582  | 1.017064  |
| 28               | 1                | 0              | 3.080178                | 2.846890  | -0.516938 |
| 29               | 1                | 0              | 4.705927                | 3.186495  | 0.067877  |
| 30               | 1                | 0              | 4.466076                | 2.003499  | -1.214142 |
| 31               | 1                | 0              | -0.663672               | 0.333706  | -1.690454 |

|    |   |   |           |           |           |
|----|---|---|-----------|-----------|-----------|
| 32 | 1 | 0 | -1.097669 | -1.235658 | 2.265610  |
| 33 | 1 | 0 | -3.508041 | -0.720964 | 2.194797  |
| 34 | 1 | 0 | -3.036525 | 0.850835  | -1.762826 |
| 35 | 1 | 0 | -6.457845 | 1.059693  | -0.578271 |
| 36 | 1 | 0 | -4.988916 | 1.944645  | -1.044201 |
| 37 | 1 | 0 | -5.320760 | 0.336435  | -1.736490 |

---

## Analysis of piperidine **8c**

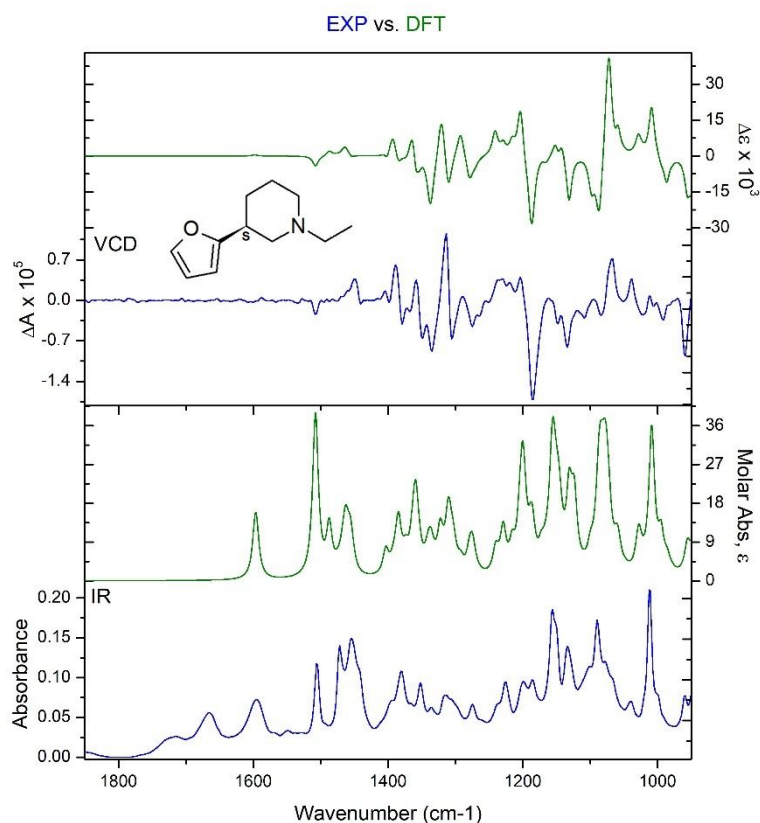

**Figure S62:** Experimental (blue) and calculated (green) VCD and IR spectra for piperidine (*S*)-**8c**, from the cascade reaction of 6-HDNO and EneIRED-01.

CompareVOA statistical data:

**8c** (*S*)-configuration

NS (IR) 90.4

NS (VCD – *S*) 72.9351

NS (VCD – *R*) 13.1508

ESI 59.784

Confidence Level 99%

DFT results for **8c** compound (7 conformers at 1% or greater Boltzmann weight)

\*There are no imaginary frequencies in any of the conformations

(*S*)-configuration calculated at cc-pVTZ / B3LYP level

Conformer 1:

Energy = -559.561187 Hartree

Standard orientation:

---

| Center<br>Number | Atomic<br>Number | Atomic<br>Type | Coordinates (Angstroms) |           |           |
|------------------|------------------|----------------|-------------------------|-----------|-----------|
|                  |                  |                | X                       | Y         | Z         |
| 1                | 6                | 0              | 0.139107                | 1.763105  | -0.004803 |
| 2                | 6                | 0              | 0.436058                | 0.345609  | 0.516800  |
| 3                | 6                | 0              | -0.545316               | -0.660530 | -0.111276 |
| 4                | 7                | 0              | -1.933348               | -0.289662 | 0.153647  |
| 5                | 6                | 0              | -2.238643               | 1.023829  | -0.413542 |
| 6                | 6                | 0              | -1.338694               | 2.102697  | 0.181521  |
| 7                | 6                | 0              | -2.855816               | -1.332482 | -0.298215 |
| 8                | 6                | 0              | -4.265905               | -1.191970 | 0.265553  |
| 9                | 6                | 0              | 2.847822                | -0.430128 | 1.165389  |
| 10               | 6                | 0              | 1.855284                | -0.061112 | 0.313350  |
| 11               | 8                | 0              | 2.329584                | -0.091813 | -0.972802 |
| 12               | 6                | 0              | 3.635654                | -0.485579 | -0.917884 |
| 13               | 6                | 0              | 4.004379                | -0.705774 | 0.365499  |
| 14               | 1                | 0              | 0.397111                | 1.811599  | -1.066091 |
| 15               | 1                | 0              | 0.770925                | 2.489055  | 0.510043  |
| 16               | 1                | 0              | 0.264982                | 0.333154  | 1.595988  |
| 17               | 1                | 0              | -0.366637               | -1.650387 | 0.310785  |
| 18               | 1                | 0              | -0.345419               | -0.727831 | -1.195078 |
| 19               | 1                | 0              | -2.120185               | 1.009552  | -1.513158 |
| 20               | 1                | 0              | -3.280410               | 1.265254  | -0.209145 |
| 21               | 1                | 0              | -1.567862               | 3.062762  | -0.285170 |
| 22               | 1                | 0              | -1.562872               | 2.200749  | 1.246951  |
| 23               | 1                | 0              | -2.899627               | -1.371519 | -1.400734 |
| 24               | 1                | 0              | -2.443945               | -2.289029 | 0.028242  |
| 25               | 1                | 0              | -4.776250               | -0.303371 | -0.104956 |
| 26               | 1                | 0              | -4.866781               | -2.055872 | -0.022143 |
| 27               | 1                | 0              | -4.238730               | -1.140444 | 1.354757  |
| 28               | 1                | 0              | 2.766560                | -0.497121 | 2.236867  |
| 29               | 1                | 0              | 4.147342                | -0.557135 | -1.860549 |
| 30               | 1                | 0              | 4.974973                | -1.023271 | 0.705930  |

---

Conformer 2:



Energy = -559.561148 Hartree

Standard orientation:

---

| Center<br>Number | Atomic<br>Number | Atomic<br>Type | Coordinates (Angstroms) |           |           |
|------------------|------------------|----------------|-------------------------|-----------|-----------|
|                  |                  |                | X                       | Y         | Z         |
| 1                | 6                | 0              | 0.115833                | 1.882384  | 0.121826  |
| 2                | 6                | 0              | 0.333328                | 0.415490  | 0.534454  |
| 3                | 6                | 0              | -0.695930               | -0.488961 | -0.169060 |
| 4                | 7                | 0              | -2.064237               | -0.062773 | 0.114601  |
| 5                | 6                | 0              | -2.291288               | 1.304792  | -0.352105 |
| 6                | 6                | 0              | -1.343215               | 2.285616  | 0.329679  |
| 7                | 6                | 0              | -3.062563               | -0.985920 | -0.427698 |
| 8                | 6                | 0              | -3.122873               | -2.326857 | 0.296587  |
| 9                | 6                | 0              | 2.696803                | -0.540389 | 1.119959  |
| 10               | 6                | 0              | 1.729354                | -0.051388 | 0.300097  |
| 11               | 8                | 0              | 2.205317                | -0.009858 | -0.985188 |
| 12               | 6                | 0              | 3.486745                | -0.480031 | -0.962404 |
| 13               | 6                | 0              | 3.838484                | -0.818663 | 0.299777  |
| 14               | 1                | 0              | 0.383186                | 1.996984  | -0.932024 |
| 15               | 1                | 0              | 0.782077                | 2.532186  | 0.691994  |
| 16               | 1                | 0              | 0.158213                | 0.330424  | 1.609682  |
| 17               | 1                | 0              | -0.561968               | -1.512109 | 0.177804  |
| 18               | 1                | 0              | -0.496791               | -0.484351 | -1.255342 |
| 19               | 1                | 0              | -2.164707               | 1.375927  | -1.448365 |
| 20               | 1                | 0              | -3.325997               | 1.573048  | -0.133733 |
| 21               | 1                | 0              | -1.569971               | 2.310594  | 1.398818  |
| 22               | 1                | 0              | -1.517687               | 3.290182  | -0.060710 |
| 23               | 1                | 0              | -4.033531               | -0.496293 | -0.334618 |
| 24               | 1                | 0              | -2.901059               | -1.154501 | -1.506737 |
| 25               | 1                | 0              | -3.282023               | -2.178112 | 1.365398  |
| 26               | 1                | 0              | -3.950743               | -2.920470 | -0.093787 |
| 27               | 1                | 0              | -2.213414               | -2.912742 | 0.166032  |
| 28               | 1                | 0              | 2.608381                | -0.685607 | 2.183086  |
| 29               | 1                | 0              | 3.996591                | -0.507459 | -1.908384 |
| 30               | 1                | 0              | 4.788499                | -1.215875 | 0.613510  |

---

Conformer 3:

Energy = -559.561080 Hartree

Standard orientation:

---

| Center<br>Number | Atomic<br>Number | Atomic<br>Type | Coordinates (Angstroms) |           |           |
|------------------|------------------|----------------|-------------------------|-----------|-----------|
|                  |                  |                | X                       | Y         | Z         |
| 1                | 6                | 0              | -0.050020               | 1.951702  | -0.145728 |
| 2                | 6                | 0              | -0.338905               | 0.479648  | -0.457182 |
| 3                | 6                | 0              | 0.676135                | -0.421575 | 0.272148  |
| 4                | 7                | 0              | 2.048387                | -0.080568 | -0.091881 |
| 5                | 6                | 0              | 2.353050                | 1.305219  | 0.263747  |
| 6                | 6                | 0              | 1.413512                | 2.277090  | -0.442856 |
| 7                | 6                | 0              | 3.027177                | -1.008560 | 0.477273  |
| 8                | 6                | 0              | 3.011955                | -2.391463 | -0.165323 |
| 9                | 6                | 0              | -2.767488               | 0.684718  | 0.533655  |
| 10               | 6                | 0              | -1.741641               | 0.090262  | -0.131287 |
| 11               | 8                | 0              | -2.146774               | -1.142758 | -0.575207 |
| 12               | 6                | 0              | -3.441586               | -1.316409 | -0.179908 |
| 13               | 6                | 0              | -3.871277               | -0.229531 | 0.501402  |
| 14               | 1                | 0              | -0.256142               | 2.143101  | 0.911711  |
| 15               | 1                | 0              | -0.713017               | 2.598682  | -0.722353 |
| 16               | 1                | 0              | -0.188959               | 0.319529  | -1.530406 |
| 17               | 1                | 0              | 0.484267                | -1.459729 | 0.010155  |
| 18               | 1                | 0              | 0.516852                | -0.324826 | 1.361968  |
| 19               | 1                | 0              | 2.282853                | 1.458554  | 1.356589  |
| 20               | 1                | 0              | 3.385893                | 1.511462  | -0.020464 |
| 21               | 1                | 0              | 1.644997                | 3.297038  | -0.130410 |
| 22               | 1                | 0              | 1.591277                | 2.220583  | -1.519905 |
| 23               | 1                | 0              | 4.013013                | -0.565293 | 0.326105  |
| 24               | 1                | 0              | 2.893540                | -1.104459 | 1.568789  |
| 25               | 1                | 0              | 3.150125                | -2.313135 | -1.244375 |
| 26               | 1                | 0              | 3.823077                | -2.997174 | 0.241350  |
| 27               | 1                | 0              | 2.081610                | -2.927781 | 0.020364  |
| 28               | 1                | 0              | -2.749708               | 1.657812  | 0.992117  |
| 29               | 1                | 0              | -3.900460               | -2.247173 | -0.460395 |
| 30               | 1                | 0              | -4.849210               | -0.087756 | 0.928346  |

---

Conformer 4:

Energy = -559.561068 Hartree

Standard orientation:

```
-----
```

| Center | Atomic | Atomic | Coordinates (Angstroms) |           |           |
|--------|--------|--------|-------------------------|-----------|-----------|
| Number | Number | Type   | X                       | Y         | Z         |
| 1      | 6      | 0      | -0.088204               | 1.831903  | -0.108185 |
| 2      | 6      | 0      | -0.441915               | 0.381076  | -0.449282 |
| 3      | 6      | 0      | 0.528423                | -0.576504 | 0.267556  |
| 4      | 7      | 0      | 1.916326                | -0.293481 | -0.087792 |
| 5      | 6      | 0      | 2.284525                | 1.069891  | 0.293034  |
| 6      | 6      | 0      | 1.389558                | 2.096764  | -0.395065 |
| 7      | 6      | 0      | 2.821864                | -1.301771 | 0.465301  |
| 8      | 6      | 0      | 4.204876                | -1.305211 | -0.177498 |
| 9      | 6      | 0      | -2.861040               | 0.680477  | 0.538501  |
| 10     | 6      | 0      | -1.862956               | 0.051728  | -0.137208 |
| 11     | 8      | 0      | -2.326642               | -1.148627 | -0.612122 |
| 12     | 6      | 0      | -3.630360               | -1.266740 | -0.225819 |
| 13     | 6      | 0      | -4.008707               | -0.176492 | 0.480148  |
| 14     | 1      | 0      | -0.719377               | 2.519337  | -0.673602 |
| 15     | 1      | 0      | -0.289020               | 2.011672  | 0.952308  |
| 16     | 1      | 0      | -0.292936               | 0.234346  | -1.524517 |
| 17     | 1      | 0      | 0.302141                | -1.604185 | -0.016089 |
| 18     | 1      | 0      | 0.363018                | -0.494600 | 1.357388  |
| 19     | 1      | 0      | 2.216366                | 1.199080  | 1.389426  |
| 20     | 1      | 0      | 3.322670                | 1.246798  | 0.016556  |
| 21     | 1      | 0      | 1.666093                | 3.098371  | -0.060648 |
| 22     | 1      | 0      | 1.567799                | 2.055677  | -1.472743 |
| 23     | 1      | 0      | 2.921317                | -1.186644 | 1.558663  |
| 24     | 1      | 0      | 2.358571                | -2.275854 | 0.299057  |
| 25     | 1      | 0      | 4.761176                | -0.390251 | 0.025045  |
| 26     | 1      | 0      | 4.792497                | -2.136799 | 0.214121  |
| 27     | 1      | 0      | 4.123489                | -1.422032 | -1.258868 |
| 28     | 1      | 0      | -2.797071               | 1.640319  | 1.020289  |
| 29     | 1      | 0      | -4.133840               | -2.166289 | -0.530551 |
| 30     | 1      | 0      | -4.980430               | 0.003708  | 0.906788  |

```
-----
```

-----  
Conformer 5:

Energy = -559.559367 Hartree

Standard orientation:

-----

| Center<br>Number | Atomic<br>Number | Atomic<br>Type | Coordinates (Angstroms) |           |           |
|------------------|------------------|----------------|-------------------------|-----------|-----------|
|                  |                  |                | X                       | Y         | Z         |
| 1                | 6                | 0              | 0.001869                | 1.867617  | 0.132102  |
| 2                | 6                | 0              | -0.399997               | 0.519370  | -0.477008 |
| 3                | 6                | 0              | 0.629761                | -0.558188 | -0.080857 |
| 4                | 7                | 0              | 1.968741                | -0.166656 | -0.497713 |
| 5                | 6                | 0              | 2.398931                | 1.080064  | 0.126600  |
| 6                | 6                | 0              | 1.445012                | 2.215959  | -0.236262 |
| 7                | 6                | 0              | 2.953616                | -1.245925 | -0.443656 |
| 8                | 6                | 0              | 3.308197                | -1.807098 | 0.940597  |
| 9                | 6                | 0              | -2.704652               | 0.563708  | 0.791672  |
| 10               | 6                | 0              | -1.786028               | 0.114240  | -0.104031 |
| 11               | 8                | 0              | -2.306035               | -0.959043 | -0.782190 |
| 12               | 6                | 0              | -3.564022               | -1.178608 | -0.300772 |
| 13               | 6                | 0              | -3.859235               | -0.276087 | 0.662860  |
| 14               | 1                | 0              | -0.679134               | 2.651654  | -0.202988 |
| 15               | 1                | 0              | -0.089344               | 1.810648  | 1.221290  |
| 16               | 1                | 0              | -0.358869               | 0.608566  | -1.567815 |
| 17               | 1                | 0              | 0.555088                | -0.720048 | 1.008065  |
| 18               | 1                | 0              | 0.378224                | -1.502248 | -0.565548 |
| 19               | 1                | 0              | 3.407256                | 1.309321  | -0.223247 |
| 20               | 1                | 0              | 2.450749                | 0.997340  | 1.226095  |
| 21               | 1                | 0              | 1.753212                | 3.129176  | 0.276540  |
| 22               | 1                | 0              | 1.513836                | 2.407377  | -1.310100 |
| 23               | 1                | 0              | 3.864665                | -0.877609 | -0.921941 |
| 24               | 1                | 0              | 2.578666                | -2.058740 | -1.070658 |
| 25               | 1                | 0              | 2.436011                | -2.226899 | 1.443046  |
| 26               | 1                | 0              | 4.044941                | -2.605363 | 0.835433  |
| 27               | 1                | 0              | 3.738985                | -1.044161 | 1.589839  |
| 28               | 1                | 0              | -2.583804               | 1.394423  | 1.464528  |
| 29               | 1                | 0              | -4.103498               | -1.996053 | -0.743891 |

30 1 0 -4.780606 -0.208775 1.215384

---

Conformer 6:

Energy = -559.559554 Hartree

Standard orientation:

---

| Center<br>Number | Atomic<br>Number | Atomic<br>Type | Coordinates (Angstroms) |           |           |
|------------------|------------------|----------------|-------------------------|-----------|-----------|
|                  |                  |                | X                       | Y         | Z         |
| 1                | 6                | 0              | 0.069222                | 1.766888  | -0.387844 |
| 2                | 6                | 0              | 0.402769                | 0.552372  | 0.498479  |
| 3                | 6                | 0              | -0.649326               | -0.553861 | 0.286582  |
| 4                | 7                | 0              | -1.990406               | -0.045648 | 0.546298  |
| 5                | 6                | 0              | -2.347830               | 1.054256  | -0.343730 |
| 6                | 6                | 0              | -1.375257               | 2.218162  | -0.170405 |
| 7                | 6                | 0              | -3.012017               | -1.084962 | 0.664854  |
| 8                | 6                | 0              | -3.331485               | -1.908144 | -0.591413 |
| 9                | 6                | 0              | 2.859520                | -0.098269 | 1.116587  |
| 10               | 6                | 0              | 1.790337                | 0.050120  | 0.290491  |
| 11               | 8                | 0              | 2.133494                | -0.365956 | -0.970570 |
| 12               | 6                | 0              | 3.434069                | -0.778685 | -0.925764 |
| 13               | 6                | 0              | 3.927094                | -0.636401 | 0.326524  |
| 14               | 1                | 0              | 0.763484                | 2.581910  | -0.175567 |
| 15               | 1                | 0              | 0.213988                | 1.491172  | -1.435977 |
| 16               | 1                | 0              | 0.340475                | 0.862316  | 1.544391  |
| 17               | 1                | 0              | -0.539563               | -0.949117 | -0.736084 |
| 18               | 1                | 0              | -0.453461               | -1.378662 | 0.974098  |
| 19               | 1                | 0              | -3.363456               | 1.373569  | -0.102313 |
| 20               | 1                | 0              | -2.350222               | 0.745700  | -1.403274 |
| 21               | 1                | 0              | -1.630394               | 3.015861  | -0.871002 |
| 22               | 1                | 0              | -1.486003               | 2.624248  | 0.838446  |
| 23               | 1                | 0              | -3.927539               | -0.599842 | 1.012631  |
| 24               | 1                | 0              | -2.695491               | -1.762253 | 1.462054  |
| 25               | 1                | 0              | -2.459796               | -2.455485 | -0.951944 |
| 26               | 1                | 0              | -4.108332               | -2.639565 | -0.362045 |
| 27               | 1                | 0              | -3.698390               | -1.281436 | -1.405076 |
| 28               | 1                | 0              | 2.885457                | 0.147312  | 2.164559  |

|    |   |   |          |           |           |
|----|---|---|----------|-----------|-----------|
| 29 | 1 | 0 | 3.848108 | -1.136448 | -1.851087 |
| 30 | 1 | 0 | 4.923450 | -0.880953 | 0.652490  |

-----

Conformer 7:

Energy = -559.558695 Hartree

Standard orientation:

-----

| Center<br>Number | Atomic<br>Number | Atomic<br>Type | Coordinates (Angstroms) |           |           |
|------------------|------------------|----------------|-------------------------|-----------|-----------|
|                  |                  |                | X                       | Y         | Z         |
| 1                | 6                | 0              | 0.257392                | 2.083269  | -0.072660 |
| 2                | 6                | 0              | 0.543591                | 0.902738  | 0.881128  |
| 3                | 6                | 0              | -0.777953               | 0.247066  | 1.300247  |
| 4                | 7                | 0              | -1.598367               | -0.162600 | 0.161166  |
| 5                | 6                | 0              | -1.920218               | 0.982805  | -0.691378 |
| 6                | 6                | 0              | -0.655622               | 1.655477  | -1.219283 |
| 7                | 6                | 0              | -2.788714               | -0.885711 | 0.609941  |
| 8                | 6                | 0              | -3.507119               | -1.648181 | -0.498367 |
| 9                | 6                | 0              | 1.474046                | -1.336330 | -0.174098 |
| 10               | 6                | 0              | 1.529882                | -0.069688 | 0.315176  |
| 11               | 8                | 0              | 2.827675                | 0.375433  | 0.265460  |
| 12               | 6                | 0              | 3.586867                | -0.629196 | -0.261359 |
| 13               | 6                | 0              | 2.810037                | -1.699935 | -0.545589 |
| 14               | 1                | 0              | -0.231612               | 2.873872  | 0.503602  |
| 15               | 1                | 0              | 1.193380                | 2.497057  | -0.449260 |
| 16               | 1                | 0              | 0.997771                | 1.311058  | 1.788774  |
| 17               | 1                | 0              | -1.321975               | 0.968315  | 1.936275  |
| 18               | 1                | 0              | -0.578213               | -0.632067 | 1.913725  |
| 19               | 1                | 0              | -2.530025               | 0.641037  | -1.525976 |
| 20               | 1                | 0              | -2.523387               | 1.723821  | -0.132788 |
| 21               | 1                | 0              | -0.933262               | 2.520770  | -1.824285 |
| 22               | 1                | 0              | -0.129380               | 0.958947  | -1.875496 |
| 23               | 1                | 0              | -2.464151               | -1.599551 | 1.369251  |
| 24               | 1                | 0              | -3.499182               | -0.202846 | 1.108714  |
| 25               | 1                | 0              | -2.823444               | -2.334695 | -0.999311 |
| 26               | 1                | 0              | -4.325494               | -2.230785 | -0.072973 |
| 27               | 1                | 0              | -3.936371               | -0.986350 | -1.250211 |

|    |   |   |          |           |           |
|----|---|---|----------|-----------|-----------|
| 28 | 1 | 0 | 0.583061 | -1.929499 | -0.273515 |
| 29 | 1 | 0 | 4.637475 | -0.424811 | -0.361610 |
| 30 | 1 | 0 | 3.138851 | -2.633420 | -0.969298 |

---

## Analysis of piperidine **9c**

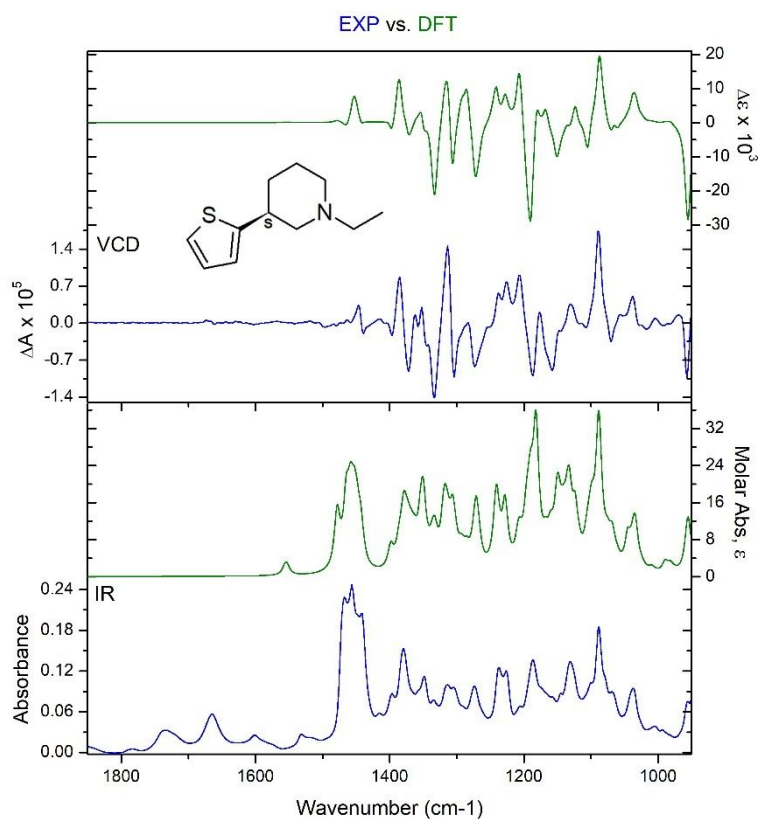

**Figure S63:** Experimental (blue) and calculated (green) VCD and IR spectra for piperidine (*S*)-**9c**, from the cascade reaction of 6-HDNO and EneIRED-01.

CompareVOA statistical data:

**9c** (*S*)-configuration

NS (IR) 92.8

NS (VCD – *S*) 74.8042

NS (VCD – *R*) 16.4716

ESI 58.333

Confidence Level 98%

DFT results for **9c** compound (8 conformers at 1% or greater Boltzmann weight)

\*There are no imaginary frequencies in any of the conformations

(*S*)-configuration calculated at cc-pVTZ / B3PW91 level

Conformer 1:

Energy = -882.314212 Hartree

Standard orientation:



| Center<br>Number | Atomic<br>Number | Atomic<br>Type | Coordinates (Angstroms) |           |           |
|------------------|------------------|----------------|-------------------------|-----------|-----------|
|                  |                  |                | X                       | Y         | Z         |
| 1                | 6                | 0              | -0.154225               | 1.792558  | -0.000889 |
| 2                | 6                | 0              | 0.169559                | 0.402010  | 0.556036  |
| 3                | 6                | 0              | -0.777187               | -0.632922 | -0.061437 |
| 4                | 7                | 0              | -2.169143               | -0.297178 | 0.186145  |
| 5                | 6                | 0              | -2.501397               | 0.991924  | -0.404566 |
| 6                | 6                | 0              | -1.635133               | 2.100416  | 0.173055  |
| 7                | 6                | 0              | -3.052586               | -1.366491 | -0.262712 |
| 8                | 6                | 0              | -4.471992               | -1.252757 | 0.268633  |
| 9                | 6                | 0              | 2.516647                | -0.246611 | 1.383527  |
| 10               | 6                | 0              | 1.607356                | 0.017934  | 0.398042  |
| 11               | 16               | 0              | 2.358898                | -0.152993 | -1.156912 |
| 12               | 6                | 0              | 3.874355                | -0.574275 | -0.462507 |
| 13               | 6                | 0              | 3.807895                | -0.583516 | 0.897287  |
| 14               | 1                | 0              | 0.103623                | 1.819919  | -1.065422 |
| 15               | 1                | 0              | 0.462837                | 2.546563  | 0.492974  |
| 16               | 1                | 0              | -0.028445               | 0.413863  | 1.632856  |
| 17               | 1                | 0              | -0.573631               | -1.614812 | 0.371522  |
| 18               | 1                | 0              | -0.566885               | -0.708916 | -1.145836 |
| 19               | 1                | 0              | -2.374922               | 0.960171  | -1.504212 |
| 20               | 1                | 0              | -3.551869               | 1.210833  | -0.211794 |
| 21               | 1                | 0              | -1.886139               | 3.046834  | -0.311793 |
| 22               | 1                | 0              | -1.866059               | 2.212532  | 1.236677  |
| 23               | 1                | 0              | -3.072193               | -1.426969 | -1.366133 |
| 24               | 1                | 0              | -2.621867               | -2.307396 | 0.088836  |
| 25               | 1                | 0              | -4.998653               | -0.384193 | -0.128536 |
| 26               | 1                | 0              | -5.045491               | -2.137155 | -0.015253 |
| 27               | 1                | 0              | -4.469387               | -1.181577 | 1.357879  |
| 28               | 1                | 0              | 2.262698                | -0.199163 | 2.434551  |
| 29               | 1                | 0              | 4.718313                | -0.789884 | -1.098201 |
| 30               | 1                | 0              | 4.649943                | -0.822122 | 1.532647  |

Conformer 2:

Energy = -882.314212 Hartree

Standard orientation:

---

| Center | Atomic | Atomic | Coordinates (Angstroms) |           |           |
|--------|--------|--------|-------------------------|-----------|-----------|
| Number | Number | Type   | X                       | Y         | Z         |
| 1      | 6      | 0      | -0.187428               | 1.907389  | 0.179202  |
| 2      | 6      | 0      | 0.069988                | 0.452609  | 0.586263  |
| 3      | 6      | 0      | -0.916235               | -0.470121 | -0.140022 |
| 4      | 7      | 0      | -2.293930               | -0.097840 | 0.132699  |
| 5      | 6      | 0      | -2.560775               | 1.261106  | -0.318034 |
| 6      | 6      | 0      | -1.654487               | 2.261045  | 0.381274  |
| 7      | 6      | 0      | -3.248731               | -1.040840 | -0.437244 |
| 8      | 6      | 0      | -3.267397               | -2.393327 | 0.256083  |
| 9      | 6      | 0      | 2.372315                | -0.409778 | 1.342011  |
| 10     | 6      | 0      | 1.489819                | 0.020935  | 0.391407  |
| 11     | 16     | 0      | 2.250567                | 0.004319  | -1.168297 |
| 12     | 6      | 0      | 3.733592                | -0.578828 | -0.522645 |
| 13     | 6      | 0      | 3.650300                | -0.751826 | 0.825234  |
| 14     | 1      | 0      | 0.078667                | 2.035253  | -0.875962 |
| 15     | 1      | 0      | 0.459063                | 2.576482  | 0.751460  |
| 16     | 1      | 0      | -0.134194               | 0.359061  | 1.657856  |
| 17     | 1      | 0      | -0.749219               | -1.496188 | 0.188050  |
| 18     | 1      | 0      | -0.704007               | -0.439868 | -1.226542 |
| 19     | 1      | 0      | -2.426317               | 1.349622  | -1.413363 |
| 20     | 1      | 0      | -3.607467               | 1.492163  | -0.107288 |
| 21     | 1      | 0      | -1.859360               | 3.265219  | 0.002594  |
| 22     | 1      | 0      | -1.888763               | 2.264763  | 1.450103  |
| 23     | 1      | 0      | -4.238593               | -0.586824 | -0.344702 |
| 24     | 1      | 0      | -3.071745               | -1.179305 | -1.519291 |
| 25     | 1      | 0      | -3.442033               | -2.273433 | 1.326869  |
| 26     | 1      | 0      | -4.069935               | -3.008764 | -0.154769 |
| 27     | 1      | 0      | -2.336012               | -2.944988 | 0.122473  |
| 28     | 1      | 0      | 2.108187                | -0.478594 | 2.389329  |
| 29     | 1      | 0      | 4.573184                | -0.758278 | -1.175131 |
| 30     | 1      | 0      | 4.471208                | -1.110740 | 1.430991  |

---

Conformer 3:

Energy = -882.313606 Hartree

Standard orientation:

---

| Center<br>Number | Atomic<br>Number | Atomic<br>Type | Coordinates (Angstroms) |           |           |
|------------------|------------------|----------------|-------------------------|-----------|-----------|
|                  |                  |                | X                       | Y         | Z         |
| 1                | 6                | 0              | 0.270096                | 1.952300  | -0.119295 |
| 2                | 6                | 0              | -0.072366               | 0.483895  | -0.387613 |
| 3                | 6                | 0              | 0.949161                | -0.424691 | 0.308231  |
| 4                | 7                | 0              | 2.306234                | -0.126744 | -0.119700 |
| 5                | 6                | 0              | 2.657511                | 1.249623  | 0.200122  |
| 6                | 6                | 0              | 1.721660                | 2.231277  | -0.486446 |
| 7                | 6                | 0              | 3.280016                | -1.062562 | 0.429331  |
| 8                | 6                | 0              | 3.185188                | -2.462874 | -0.154119 |
| 9                | 6                | 0              | -2.079189               | 0.264755  | 1.240953  |
| 10               | 6                | 0              | -1.472853               | 0.135407  | 0.021362  |
| 11               | 16               | 0              | -2.577209               | -0.557307 | -1.114738 |
| 12               | 6                | 0              | -3.835620               | -0.666518 | 0.048664  |
| 13               | 6                | 0              | -3.423712               | -0.191408 | 1.257858  |
| 14               | 1                | 0              | -0.406855               | 2.602768  | -0.677621 |
| 15               | 1                | 0              | 0.114268                | 2.167751  | 0.942849  |
| 16               | 1                | 0              | 0.028567                | 0.307105  | -1.463258 |
| 17               | 1                | 0              | 0.717027                | -1.463620 | 0.073155  |
| 18               | 1                | 0              | 0.841765                | -0.309347 | 1.403628  |
| 19               | 1                | 0              | 2.630179                | 1.422327  | 1.293429  |
| 20               | 1                | 0              | 3.686483                | 1.423415  | -0.123008 |
| 21               | 1                | 0              | 1.995690                | 3.251589  | -0.207699 |
| 22               | 1                | 0              | 1.851566                | 2.146368  | -1.569601 |
| 23               | 1                | 0              | 4.270819                | -0.657864 | 0.208000  |
| 24               | 1                | 0              | 3.205009                | -1.112461 | 1.530893  |
| 25               | 1                | 0              | 3.255538                | -2.430534 | -1.242911 |
| 26               | 1                | 0              | 4.004439                | -3.077496 | 0.223703  |
| 27               | 1                | 0              | 2.254560                | -2.965507 | 0.112279  |
| 28               | 1                | 0              | -1.579665               | 0.676656  | 2.107687  |
| 29               | 1                | 0              | -4.798413               | -1.067283 | -0.225260 |
| 30               | 1                | 0              | -4.058626               | -0.164974 | 2.133145  |

---

Conformer 4:

Energy = -882.313604 Hartree

Standard orientation:

---

| Center<br>Number | Atomic<br>Number | Atomic<br>Type | Coordinates (Angstroms) |           |           |
|------------------|------------------|----------------|-------------------------|-----------|-----------|
|                  |                  |                | X                       | Y         | Z         |
| 1                | 6                | 0              | 0.222629                | 1.832232  | -0.080543 |
| 2                | 6                | 0              | -0.173048               | 0.382407  | -0.375156 |
| 3                | 6                | 0              | 0.808348                | -0.571801 | 0.316017  |
| 4                | 7                | 0              | 2.179510                | -0.321378 | -0.097786 |
| 5                | 6                | 0              | 2.582402                | 1.035206  | 0.244365  |
| 6                | 6                | 0              | 1.686733                | 2.061658  | -0.431564 |
| 7                | 6                | 0              | 3.079949                | -1.330315 | 0.446544  |
| 8                | 6                | 0              | 4.447744                | -1.354798 | -0.215798 |
| 9                | 6                | 0              | -2.205492               | 0.224352  | 1.228917  |
| 10               | 6                | 0              | -1.589578               | 0.081238  | 0.015548  |
| 11               | 16               | 0              | -2.704504               | -0.562903 | -1.138382 |
| 12               | 6                | 0              | -3.980370               | -0.632804 | 0.008644  |
| 13               | 6                | 0              | -3.566005               | -0.181928 | 1.226385  |
| 14               | 1                | 0              | 0.065975                | 2.036611  | 0.983679  |
| 15               | 1                | 0              | -0.424321               | 2.516859  | -0.633609 |
| 16               | 1                | 0              | -0.068079               | 0.218108  | -1.452444 |
| 17               | 1                | 0              | 0.551633                | -1.602782 | 0.062331  |
| 18               | 1                | 0              | 0.689873                | -0.470009 | 1.411340  |
| 19               | 1                | 0              | 2.552286                | 1.185972  | 1.341184  |
| 20               | 1                | 0              | 3.615598                | 1.187449  | -0.068630 |
| 21               | 1                | 0              | 1.996672                | 3.066045  | -0.133215 |
| 22               | 1                | 0              | 1.822018                | 1.991405  | -1.515141 |
| 23               | 1                | 0              | 3.197691                | -1.208045 | 1.538726  |
| 24               | 1                | 0              | 2.601685                | -2.301610 | 0.296868  |
| 25               | 1                | 0              | 5.021948                | -0.447702 | -0.023186 |
| 26               | 1                | 0              | 5.029813                | -2.194670 | 0.168229  |
| 27               | 1                | 0              | 4.348935                | -1.472774 | -1.296448 |
| 28               | 1                | 0              | -1.702029               | 0.611619  | 2.104701  |
| 29               | 1                | 0              | -4.953949               | -0.995282 | -0.280151 |
| 30               | 1                | 0              | -4.210124               | -0.137789 | 2.094220  |

---

Conformer 5:

Energy = -882.312673 Hartree

Standard orientation:

```
-----
```

| Center<br>Number | Atomic<br>Number | Atomic<br>Type | Coordinates (Angstroms) |           |           |
|------------------|------------------|----------------|-------------------------|-----------|-----------|
|                  |                  |                | X                       | Y         | Z         |
| 1                | 6                | 0              | -0.222445               | 1.770676  | -0.487168 |
| 2                | 6                | 0              | 0.138963                | 0.649687  | 0.494669  |
| 3                | 6                | 0              | -0.872124               | -0.496694 | 0.358838  |
| 4                | 7                | 0              | -2.223421               | -0.017830 | 0.571843  |
| 5                | 6                | 0              | -2.606212               | 0.994516  | -0.397750 |
| 6                | 6                | 0              | -1.674867               | 2.194396  | -0.309299 |
| 7                | 6                | 0              | -3.206760               | -1.075111 | 0.757700  |
| 8                | 6                | 0              | -3.480043               | -1.997845 | -0.431645 |
| 9                | 6                | 0              | 2.547856                | 0.232067  | 1.294968  |
| 10               | 6                | 0              | 1.552756                | 0.178682  | 0.359479  |
| 11               | 16               | 0              | 2.155765                | -0.542254 | -1.099788 |
| 12               | 6                | 0              | 3.726231                | -0.758303 | -0.434187 |
| 13               | 6                | 0              | 3.786175                | -0.299844 | 0.846425  |
| 14               | 1                | 0              | -0.068970               | 1.410904  | -1.510840 |
| 15               | 1                | 0              | 0.451235                | 2.619142  | -0.347534 |
| 16               | 1                | 0              | 0.040810                | 1.044722  | 1.511019  |
| 17               | 1                | 0              | -0.653490               | -1.267354 | 1.102178  |
| 18               | 1                | 0              | -0.740625               | -0.960886 | -0.635387 |
| 19               | 1                | 0              | -2.588968               | 0.605889  | -1.431927 |
| 20               | 1                | 0              | -3.635094               | 1.298128  | -0.188567 |
| 21               | 1                | 0              | -1.802064               | 2.672019  | 0.666885  |
| 22               | 1                | 0              | -1.950598               | 2.929981  | -1.068832 |
| 23               | 1                | 0              | -2.878224               | -1.679123 | 1.609003  |
| 24               | 1                | 0              | -4.143187               | -0.596635 | 1.060125  |
| 25               | 1                | 0              | -2.585062               | -2.541322 | -0.739866 |
| 26               | 1                | 0              | -4.235533               | -2.737096 | -0.157260 |
| 27               | 1                | 0              | -3.856684               | -1.447364 | -1.295521 |
| 28               | 1                | 0              | 2.393104                | 0.645693  | 2.283114  |
| 29               | 1                | 0              | 4.505950                | -1.210312 | -1.026312 |
| 30               | 1                | 0              | 4.681931                | -0.338875 | 1.451245  |

```
-----
```

-----  
Conformer 6:

Energy = -882.312024 Hartree

Standard orientation:  
-----

| Center<br>Number | Atomic<br>Number | Atomic<br>Type | Coordinates (Angstroms) |           |           |
|------------------|------------------|----------------|-------------------------|-----------|-----------|
|                  |                  |                | X                       | Y         | Z         |
| 1                | 6                | 0              | 0.306903                | 1.811184  | 0.450764  |
| 2                | 6                | 0              | -0.135736               | 0.563857  | -0.322321 |
| 3                | 6                | 0              | 0.899713                | -0.553324 | -0.128076 |
| 4                | 7                | 0              | 2.214550                | -0.111942 | -0.549377 |
| 5                | 6                | 0              | 2.681639                | 1.027095  | 0.222325  |
| 6                | 6                | 0              | 1.728436                | 2.202903  | 0.065874  |
| 7                | 6                | 0              | 3.188635                | -1.185639 | -0.683710 |
| 8                | 6                | 0              | 3.600863                | -1.923250 | 0.591804  |
| 9                | 6                | 0              | -2.019604               | -0.210539 | 1.286910  |
| 10               | 6                | 0              | -1.512195               | 0.105358  | 0.055960  |
| 11               | 16               | 0              | -2.723504               | -0.125794 | -1.156608 |
| 12               | 6                | 0              | -3.893115               | -0.639867 | -0.009363 |
| 13               | 6                | 0              | -3.374287               | -0.635038 | 1.250878  |
| 14               | 1                | 0              | -0.387748               | 2.632976  | 0.262682  |
| 15               | 1                | 0              | 0.264088                | 1.599494  | 1.524416  |
| 16               | 1                | 0              | -0.133721               | 0.812928  | -1.388260 |
| 17               | 1                | 0              | 0.615713                | -1.423780 | -0.724762 |
| 18               | 1                | 0              | 0.875630                | -0.865292 | 0.931075  |
| 19               | 1                | 0              | 2.779141                | 0.786971  | 1.296445  |
| 20               | 1                | 0              | 3.678200                | 1.298842  | -0.134967 |
| 21               | 1                | 0              | 2.071040                | 3.037266  | 0.682837  |
| 22               | 1                | 0              | 1.748121                | 2.540004  | -0.974915 |
| 23               | 1                | 0              | 2.780541                | -1.907863 | -1.397285 |
| 24               | 1                | 0              | 4.080362                | -0.757454 | -1.151523 |
| 25               | 1                | 0              | 2.752268                | -2.416050 | 1.069801  |
| 26               | 1                | 0              | 4.335300                | -2.694441 | 0.349953  |
| 27               | 1                | 0              | 4.057383                | -1.251161 | 1.320787  |
| 28               | 1                | 0              | -1.442337               | -0.141401 | 2.199259  |
| 29               | 1                | 0              | -4.887570               | -0.909007 | -0.327615 |

30 1 0 -3.939707 -0.922172 2.127159

---

Conformer 7:

Energy = -882.311811 Hartree

Standard orientation:

---

| Center<br>Number | Atomic<br>Number | Atomic<br>Type | Coordinates (Angstroms) |           |           |
|------------------|------------------|----------------|-------------------------|-----------|-----------|
|                  |                  |                | X                       | Y         | Z         |
| 1                | 6                | 0              | -0.110243               | 2.239496  | -0.377157 |
| 2                | 6                | 0              | 0.322828                | 1.283641  | 0.748840  |
| 3                | 6                | 0              | -0.908981               | 0.564648  | 1.303010  |
| 4                | 7                | 0              | -1.648038               | -0.128768 | 0.261422  |
| 5                | 6                | 0              | -2.140772               | 0.814176  | -0.733875 |
| 6                | 6                | 0              | -0.990985               | 1.547860  | -1.407044 |
| 7                | 6                | 0              | -2.704791               | -0.956217 | 0.830347  |
| 8                | 6                | 0              | -3.304181               | -1.955689 | -0.145157 |
| 9                | 6                | 0              | 2.765682                | 0.533737  | 0.669270  |
| 10               | 6                | 0              | 1.442314                | 0.357034  | 0.368258  |
| 11               | 16               | 0              | 1.238525                | -1.108966 | -0.537656 |
| 12               | 6                | 0              | 2.923886                | -1.452747 | -0.500650 |
| 13               | 6                | 0              | 3.612564                | -0.492993 | 0.176979  |
| 14               | 1                | 0              | 0.767992                | 2.686406  | -0.847303 |
| 15               | 1                | 0              | -0.676514               | 3.056582  | 0.083267  |
| 16               | 1                | 0              | 0.725029                | 1.896329  | 1.560903  |
| 17               | 1                | 0              | -1.545904               | 1.312077  | 1.812553  |
| 18               | 1                | 0              | -0.603472               | -0.164975 | 2.055890  |
| 19               | 1                | 0              | -2.718987               | 0.271889  | -1.481935 |
| 20               | 1                | 0              | -2.825050               | 1.548480  | -0.265583 |
| 21               | 1                | 0              | -0.403314               | 0.832200  | -1.987782 |
| 22               | 1                | 0              | -1.390301               | 2.279600  | -2.113539 |
| 23               | 1                | 0              | -2.266225               | -1.503808 | 1.668161  |
| 24               | 1                | 0              | -3.507872               | -0.327840 | 1.256837  |
| 25               | 1                | 0              | -2.527544               | -2.588428 | -0.577987 |
| 26               | 1                | 0              | -4.014906               | -2.598158 | 0.378035  |
| 27               | 1                | 0              | -3.844675               | -1.473258 | -0.960351 |
| 28               | 1                | 0              | 3.120405                | 1.383526  | 1.238639  |

|    |   |   |          |           |           |
|----|---|---|----------|-----------|-----------|
| 29 | 1 | 0 | 3.303839 | -2.345855 | -0.971494 |
| 30 | 1 | 0 | 4.683442 | -0.517607 | 0.327308  |

-----

Conformer 8:

Energy = -882.311622 Hartree

Standard orientation:

-----

| Center<br>Number | Atomic<br>Number | Atomic<br>Type | Coordinates (Angstroms) |           |           |
|------------------|------------------|----------------|-------------------------|-----------|-----------|
|                  |                  |                | X                       | Y         | Z         |
| 1                | 6                | 0              | -0.229189               | 2.299167  | 0.173432  |
| 2                | 6                | 0              | 0.123790                | 1.048077  | 0.997825  |
| 3                | 6                | 0              | -1.131061               | 0.186968  | 1.172872  |
| 4                | 7                | 0              | -1.733868               | -0.161210 | -0.102298 |
| 5                | 6                | 0              | -2.153479               | 1.037719  | -0.816253 |
| 6                | 6                | 0              | -0.971518               | 1.947653  | -1.107614 |
| 7                | 6                | 0              | -2.839840               | -1.101005 | 0.040967  |
| 8                | 6                | 0              | -2.418906               | -2.503605 | 0.446961  |
| 9                | 6                | 0              | 2.585302                | 0.357208  | 0.978626  |
| 10               | 6                | 0              | 1.312845                | 0.290812  | 0.478625  |
| 11               | 16               | 0              | 1.271697                | -0.796245 | -0.873101 |
| 12               | 6                | 0              | 2.953972                | -1.132860 | -0.748771 |
| 13               | 6                | 0              | 3.522391                | -0.450737 | 0.283831  |
| 14               | 1                | 0              | 0.673728                | 2.874602  | -0.040356 |
| 15               | 1                | 0              | -0.872140               | 2.932426  | 0.794470  |
| 16               | 1                | 0              | 0.416633                | 1.385084  | 1.996422  |
| 17               | 1                | 0              | -1.848318               | 0.745248  | 1.804635  |
| 18               | 1                | 0              | -0.872767               | -0.725712 | 1.709614  |
| 19               | 1                | 0              | -2.912592               | 1.595685  | -0.234188 |
| 20               | 1                | 0              | -2.630674               | 0.731233  | -1.749707 |
| 21               | 1                | 0              | -1.324755               | 2.857299  | -1.599349 |
| 22               | 1                | 0              | -0.299605               | 1.446696  | -1.809251 |
| 23               | 1                | 0              | -3.589334               | -0.716105 | 0.756300  |
| 24               | 1                | 0              | -3.341392               | -1.154136 | -0.928460 |
| 25               | 1                | 0              | -3.291343               | -3.159758 | 0.456953  |
| 26               | 1                | 0              | -1.694215               | -2.910219 | -0.259995 |
| 27               | 1                | 0              | -1.977600               | -2.537365 | 1.443867  |



|    |   |   |          |           |           |
|----|---|---|----------|-----------|-----------|
| 28 | 1 | 0 | 2.839644 | 0.973144  | 1.831828  |
| 29 | 1 | 0 | 3.419620 | -1.821673 | -1.436087 |
| 30 | 1 | 0 | 4.569194 | -0.524437 | 0.546005  |

---

## Analysis of piperidine 10c

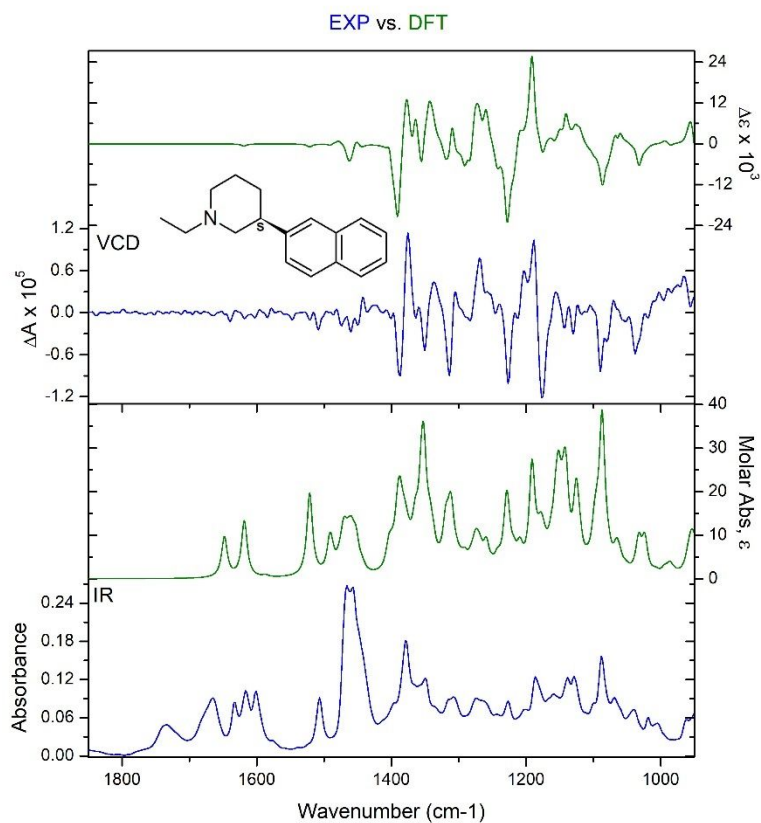

**Figure S64:** Experimental (blue) and calculated (green) VCD and IR spectra for piperidine (S)-**10c**, from the cascade reaction of 6-HDNO and EneIRED-07.

CompareVOA statistical data:

**10c** (S)-configuration

NS (IR) 85.5

NS (VCD – S) 70.4232

NS (VCD – R) 17.6977

ESI 52.726

Confidence Level 93%

DFT results for **10c** compound (9 conformers at 1% or greater Boltzmann weight)

\*There are no imaginary frequencies in any of the conformations

(S)-configuration calculated at 6-31G(d) / B3PW91 level

Conformer 1:

Energy = -714.966781 Hartree

Standard orientation:

```
-----
```

| Center | Atomic | Atomic | Coordinates (Angstroms) |           |           |
|--------|--------|--------|-------------------------|-----------|-----------|
| Number | Number | Type   | X                       | Y         | Z         |
| 1      | 6      | 0      | -1.687038               | -1.944655 | -0.448657 |
| 2      | 6      | 0      | -1.156024               | -0.503673 | -0.508820 |
| 3      | 6      | 0      | -2.070858               | 0.423151  | 0.310102  |
| 4      | 7      | 0      | -3.451684               | 0.361798  | -0.156164 |
| 5      | 6      | 0      | -3.977389               | -0.994312 | -0.026760 |
| 6      | 6      | 0      | -3.159751               | -1.981631 | -0.853234 |
| 7      | 6      | 0      | -4.308856               | 1.324839  | 0.531870  |
| 8      | 6      | 0      | -4.029743               | 2.776226  | 0.155843  |
| 9      | 6      | 0      | 1.252693                | 0.074891  | -0.948688 |
| 10     | 6      | 0      | 0.289058                | -0.387696 | -0.075638 |
| 11     | 6      | 0      | 3.000763                | -0.165467 | 0.757603  |
| 12     | 6      | 0      | 2.614738                | 0.198081  | -0.570351 |
| 13     | 6      | 0      | 0.690369                | -0.749014 | 1.241144  |
| 14     | 6      | 0      | 1.999777                | -0.640170 | 1.644368  |
| 15     | 6      | 0      | 4.361737                | -0.040350 | 1.138940  |
| 16     | 6      | 0      | 3.608673                | 0.672804  | -1.466001 |
| 17     | 6      | 0      | 5.302005                | 0.423732  | 0.247533  |
| 18     | 6      | 0      | 4.921166                | 0.783394  | -1.067244 |
| 19     | 1      | 0      | -1.582024               | -2.331416 | 0.575264  |
| 20     | 1      | 0      | -1.086121               | -2.594945 | -1.096244 |
| 21     | 1      | 0      | -1.222103               | -0.167412 | -1.552775 |
| 22     | 1      | 0      | -1.706804               | 1.451141  | 0.215698  |
| 23     | 1      | 0      | -2.001925               | 0.154881  | 1.385799  |
| 24     | 1      | 0      | -3.987100               | -1.323511 | 1.034360  |
| 25     | 1      | 0      | -5.019621               | -0.992634 | -0.368518 |
| 26     | 1      | 0      | -3.568167               | -2.991847 | -0.726598 |
| 27     | 1      | 0      | -3.258546               | -1.721502 | -1.915624 |
| 28     | 1      | 0      | -5.343689               | 1.087318  | 0.255197  |
| 29     | 1      | 0      | -4.246407               | 1.204979  | 1.632782  |
| 30     | 1      | 0      | -4.073832               | 2.906033  | -0.931021 |
| 31     | 1      | 0      | -4.782587               | 3.429217  | 0.611281  |
| 32     | 1      | 0      | -3.049652               | 3.121094  | 0.501536  |
| 33     | 1      | 0      | 0.970469                | 0.357640  | -1.961809 |

```
-----
```

|    |   |   |           |           |           |
|----|---|---|-----------|-----------|-----------|
| 34 | 1 | 0 | -0.052653 | -1.118077 | 1.944011  |
| 35 | 1 | 0 | 2.285049  | -0.920463 | 2.656254  |
| 36 | 1 | 0 | 4.650507  | -0.318332 | 2.150396  |
| 37 | 1 | 0 | 3.314885  | 0.949706  | -2.476289 |
| 38 | 1 | 0 | 6.341906  | 0.515722  | 0.550239  |
| 39 | 1 | 0 | 5.672283  | 1.148918  | -1.762840 |

-----

Conformer 2:

Energy = -714.966742 Hartree

Standard orientation:

-----

| Center<br>Number | Atomic<br>Number | Atomic<br>Type | Coordinates (Angstroms) |           |           |
|------------------|------------------|----------------|-------------------------|-----------|-----------|
|                  |                  |                | X                       | Y         | Z         |
| 1                | 6                | 0              | 1.616595                | 1.702912  | -0.834137 |
| 2                | 6                | 0              | 1.058905                | 0.296306  | -0.565773 |
| 3                | 6                | 0              | 1.947812                | -0.426053 | 0.460159  |
| 4                | 7                | 0              | 3.333439                | -0.501938 | 0.009658  |
| 5                | 6                | 0              | 3.886597                | 0.837138  | -0.172427 |
| 6                | 6                | 0              | 3.093790                | 1.620879  | -1.214529 |
| 7                | 6                | 0              | 4.131394                | -1.315956 | 0.924043  |
| 8                | 6                | 0              | 5.489840                | -1.719117 | 0.360151  |
| 9                | 6                | 0              | -1.347104               | -0.374507 | -0.869237 |
| 10               | 6                | 0              | -0.392855               | 0.304248  | -0.138709 |
| 11               | 6                | 0              | -3.116708               | 0.320381  | 0.683104  |
| 12               | 6                | 0              | -2.714847               | -0.388744 | -0.491776 |
| 13               | 6                | 0              | -0.809226               | 1.005135  | 1.027666  |
| 14               | 6                | 0              | -2.124780               | 1.012344  | 1.425379  |
| 15               | 6                | 0              | -4.483942               | 0.307741  | 1.062300  |
| 16               | 6                | 0              | -3.699525               | -1.084356 | -1.241557 |
| 17               | 6                | 0              | -5.414954               | -0.376301 | 0.314392  |
| 18               | 6                | 0              | -5.018297               | -1.079014 | -0.848286 |
| 19               | 1                | 0              | 1.508285                | 2.318931  | 0.070009  |
| 20               | 1                | 0              | 1.035100                | 2.194562  | -1.623792 |
| 21               | 1                | 0              | 1.132379                | -0.275402 | -1.501033 |
| 22               | 1                | 0              | 1.574846                | -1.447262 | 0.605700  |
| 23               | 1                | 0              | 1.868876                | 0.087833  | 1.441405  |

|    |   |   |           |           |           |
|----|---|---|-----------|-----------|-----------|
| 24 | 1 | 0 | 3.891394  | 1.397509  | 0.787234  |
| 25 | 1 | 0 | 4.928800  | 0.750630  | -0.495793 |
| 26 | 1 | 0 | 3.198034  | 1.122093  | -2.187348 |
| 27 | 1 | 0 | 3.520681  | 2.626099  | -1.317888 |
| 28 | 1 | 0 | 4.268042  | -0.807773 | 1.900478  |
| 29 | 1 | 0 | 3.555852  | -2.227211 | 1.129474  |
| 30 | 1 | 0 | 6.165091  | -0.865985 | 0.237619  |
| 31 | 1 | 0 | 5.979156  | -2.425786 | 1.039662  |
| 32 | 1 | 0 | 5.371578  | -2.204774 | -0.614634 |
| 33 | 1 | 0 | -1.052185 | -0.918912 | -1.765222 |
| 34 | 1 | 0 | -0.073235 | 1.546426  | 1.617016  |
| 35 | 1 | 0 | -2.422178 | 1.554427  | 2.320674  |
| 36 | 1 | 0 | -4.785263 | 0.849100  | 1.956670  |
| 37 | 1 | 0 | -3.393491 | -1.623959 | -2.135341 |
| 38 | 1 | 0 | -6.459750 | -0.379300 | 0.614212  |
| 39 | 1 | 0 | -5.762267 | -1.615887 | -1.431291 |

-----

Conformer 3:

Energy = -714.966301 Hartree

Standard orientation:

-----

| Center<br>Number | Atomic<br>Number | Atomic<br>Type | Coordinates (Angstroms) |           |           |
|------------------|------------------|----------------|-------------------------|-----------|-----------|
|                  |                  |                | X                       | Y         | Z         |
| 1                | 6                | 0              | 1.494747                | 0.706326  | 1.736042  |
| 2                | 6                | 0              | 1.107005                | 0.803161  | 0.253096  |
| 3                | 6                | 0              | 1.876508                | -0.256834 | -0.552629 |
| 4                | 7                | 0              | 3.318675                | -0.112844 | -0.388645 |
| 5                | 6                | 0              | 3.694341                | -0.281429 | 1.011884  |
| 6                | 6                | 0              | 3.013522                | 0.764099  | 1.890808  |
| 7                | 6                | 0              | 4.037967                | -1.024904 | -1.275096 |
| 8                | 6                | 0              | 5.520023                | -0.695768 | -1.420497 |
| 9                | 6                | 0              | -1.122765               | -0.388492 | 0.426519  |
| 10               | 6                | 0              | -0.386277               | 0.707217  | 0.017554  |
| 11               | 6                | 0              | -3.187772               | 0.595309  | -0.468537 |
| 12               | 6                | 0              | -2.520139               | -0.478056 | 0.201088  |
| 13               | 6                | 0              | -1.065012               | 1.762309  | -0.649385 |

|    |   |   |           |           |           |
|----|---|---|-----------|-----------|-----------|
| 14 | 6 | 0 | -2.418857 | 1.711712  | -0.884741 |
| 15 | 6 | 0 | -4.587053 | 0.506161  | -0.689766 |
| 16 | 6 | 0 | -3.282222 | -1.600213 | 0.622576  |
| 17 | 6 | 0 | -5.297099 | -0.594464 | -0.268650 |
| 18 | 6 | 0 | -4.637595 | -1.657694 | 0.393858  |
| 19 | 1 | 0 | 1.124454  | -0.242957 | 2.148449  |
| 20 | 1 | 0 | 1.011450  | 1.509273  | 2.306258  |
| 21 | 1 | 0 | 1.444992  | 1.781680  | -0.115295 |
| 22 | 1 | 0 | 1.635950  | -0.148129 | -1.617391 |
| 23 | 1 | 0 | 1.529889  | -1.266581 | -0.246906 |
| 24 | 1 | 0 | 3.428724  | -1.298226 | 1.373367  |
| 25 | 1 | 0 | 4.780861  | -0.184830 | 1.102683  |
| 26 | 1 | 0 | 3.299499  | 0.603256  | 2.937616  |
| 27 | 1 | 0 | 3.378345  | 1.759471  | 1.603902  |
| 28 | 1 | 0 | 3.918858  | -2.079056 | -0.951443 |
| 29 | 1 | 0 | 3.567183  | -0.951956 | -2.263438 |
| 30 | 1 | 0 | 6.079027  | -0.851053 | -0.491893 |
| 31 | 1 | 0 | 5.971060  | -1.340331 | -2.183195 |
| 32 | 1 | 0 | 5.652422  | 0.347061  | -1.728847 |
| 33 | 1 | 0 | -0.636125 | -1.215109 | 0.940901  |
| 34 | 1 | 0 | -0.493913 | 2.628791  | -0.976618 |
| 35 | 1 | 0 | -2.917195 | 2.533426  | -1.394830 |
| 36 | 1 | 0 | -5.090313 | 1.325326  | -1.199104 |
| 37 | 1 | 0 | -2.774634 | -2.416554 | 1.132168  |
| 38 | 1 | 0 | -6.368426 | -0.652000 | -0.443054 |
| 39 | 1 | 0 | -5.208776 | -2.522243 | 0.722430  |

-----

Conformer 4:

Energy = -714.966259 Hartree

Standard orientation:

-----

| Center<br>Number | Atomic<br>Number | Atomic<br>Type | Coordinates (Angstroms) |           |           |
|------------------|------------------|----------------|-------------------------|-----------|-----------|
|                  |                  |                | X                       | Y         | Z         |
| 1                | 6                | 0              | 1.566505                | -1.987838 | 0.038201  |
| 2                | 6                | 0              | 1.208794                | -0.613746 | 0.624708  |
| 3                | 6                | 0              | 1.983564                | 0.487047  | -0.119883 |

-----

|    |   |   |           |           |           |
|----|---|---|-----------|-----------|-----------|
| 4  | 7 | 0 | 3.422890  | 0.261320  | -0.058338 |
| 5  | 6 | 0 | 3.768677  | -1.010798 | -0.686133 |
| 6  | 6 | 0 | 3.082545  | -2.176293 | 0.019535  |
| 7  | 6 | 0 | 4.181818  | 1.363020  | -0.646282 |
| 8  | 6 | 0 | 4.141702  | 2.645497  | 0.178120  |
| 9  | 6 | 0 | -1.027137 | -0.306156 | -0.527985 |
| 10 | 6 | 0 | -0.280908 | -0.339561 | 0.634876  |
| 11 | 6 | 0 | -3.075206 | 0.188863  | 0.734737  |
| 12 | 6 | 0 | -2.421103 | -0.044735 | -0.515882 |
| 13 | 6 | 0 | -0.946417 | -0.102635 | 1.867612  |
| 14 | 6 | 0 | -2.296816 | 0.151317  | 1.919379  |
| 15 | 6 | 0 | -4.470842 | 0.447582  | 0.745775  |
| 16 | 6 | 0 | -3.192845 | -0.008513 | -1.707869 |
| 17 | 6 | 0 | -5.190326 | 0.475598  | -0.426547 |
| 18 | 6 | 0 | -4.544303 | 0.245249  | -1.665057 |
| 19 | 1 | 0 | 1.178270  | -2.057544 | -0.988010 |
| 20 | 1 | 0 | 1.079539  | -2.783531 | 0.615427  |
| 21 | 1 | 0 | 1.562274  | -0.594417 | 1.664898  |
| 22 | 1 | 0 | 1.752226  | 1.454316  | 0.337526  |
| 23 | 1 | 0 | 1.630934  | 0.535956  | -1.171960 |
| 24 | 1 | 0 | 3.490357  | -1.017741 | -1.761692 |
| 25 | 1 | 0 | 4.857678  | -1.132849 | -0.638411 |
| 26 | 1 | 0 | 3.347231  | -3.115335 | -0.482050 |
| 27 | 1 | 0 | 3.460555  | -2.239184 | 1.048674  |
| 28 | 1 | 0 | 5.224643  | 1.030079  | -0.720422 |
| 29 | 1 | 0 | 3.848874  | 1.574225  | -1.682991 |
| 30 | 1 | 0 | 4.458282  | 2.449329  | 1.208360  |
| 31 | 1 | 0 | 4.821592  | 3.387427  | -0.255366 |
| 32 | 1 | 0 | 3.144656  | 3.097091  | 0.207131  |
| 33 | 1 | 0 | -0.550632 | -0.484913 | -1.490091 |
| 34 | 1 | 0 | -0.367624 | -0.125949 | 2.788726  |
| 35 | 1 | 0 | -2.784774 | 0.327260  | 2.875773  |
| 36 | 1 | 0 | -4.963354 | 0.624030  | 1.699729  |
| 37 | 1 | 0 | -2.695759 | -0.185766 | -2.659299 |
| 38 | 1 | 0 | -6.258652 | 0.674954  | -0.406364 |
| 39 | 1 | 0 | -5.122762 | 0.269936  | -2.585065 |

---

Conformer 5:

Energy = -714.965746 Hartree

Standard orientation:

```
-----
```

| Center<br>Number | Atomic<br>Number | Atomic<br>Type | Coordinates (Angstroms) |           |           |
|------------------|------------------|----------------|-------------------------|-----------|-----------|
|                  |                  |                | X                       | Y         | Z         |
| 1                | 6                | 0              | -1.675731               | -1.672650 | 0.909453  |
| 2                | 6                | 0              | -1.097663               | -0.742951 | -0.170571 |
| 3                | 6                | 0              | -2.027370               | 0.469737  | -0.358872 |
| 4                | 7                | 0              | -3.377379               | 0.038610  | -0.689992 |
| 5                | 6                | 0              | -3.961538               | -0.777655 | 0.366081  |
| 6                | 6                | 0              | -3.125312               | -2.035285 | 0.586950  |
| 7                | 6                | 0              | -4.242305               | 1.117255  | -1.156240 |
| 8                | 6                | 0              | -4.584560               | 2.229360  | -0.156298 |
| 9                | 6                | 0              | 1.343586                | -0.634660 | -0.767174 |
| 10               | 6                | 0              | 0.327720                | -0.323330 | 0.113887  |
| 11               | 6                | 0              | 3.004408                | 0.474681  | 0.659341  |
| 12               | 6                | 0              | 2.690056                | -0.255995 | -0.528733 |
| 13               | 6                | 0              | 0.657890                | 0.402657  | 1.292731  |
| 14               | 6                | 0              | 1.950256                | 0.789690  | 1.555526  |
| 15               | 6                | 0              | 4.350167                | 0.854550  | 0.899840  |
| 16               | 6                | 0              | 3.737783                | -0.578158 | -1.431080 |
| 17               | 6                | 0              | 5.343868                | 0.527096  | 0.005808  |
| 18               | 6                | 0              | 5.033975                | -0.196141 | -1.170638 |
| 19               | 1                | 0              | -1.057626               | -2.574712 | 0.997141  |
| 20               | 1                | 0              | -1.637864               | -1.167137 | 1.885372  |
| 21               | 1                | 0              | -1.103849               | -1.293078 | -1.121565 |
| 22               | 1                | 0              | -1.651543               | 1.094577  | -1.179029 |
| 23               | 1                | 0              | -1.996425               | 1.091068  | 0.558457  |
| 24               | 1                | 0              | -4.041765               | -0.227710 | 1.325833  |
| 25               | 1                | 0              | -4.982010               | -1.048168 | 0.066849  |
| 26               | 1                | 0              | -3.560526               | -2.630901 | 1.399044  |
| 27               | 1                | 0              | -3.159244               | -2.648213 | -0.323535 |
| 28               | 1                | 0              | -3.760527               | 1.563686  | -2.036776 |
| 29               | 1                | 0              | -5.173782               | 0.655893  | -1.511517 |
| 30               | 1                | 0              | -3.687473               | 2.751998  | 0.193977  |
| 31               | 1                | 0              | -5.235187               | 2.971628  | -0.633124 |

```
-----
```



|    |   |   |           |           |           |
|----|---|---|-----------|-----------|-----------|
| 32 | 1 | 0 | -5.113872 | 1.839757  | 0.720355  |
| 33 | 1 | 0 | 1.116114  | -1.188964 | -1.676621 |
| 34 | 1 | 0 | -0.126197 | 0.656167  | 2.002080  |
| 35 | 1 | 0 | 2.180748  | 1.344768  | 2.462561  |
| 36 | 1 | 0 | 4.584287  | 1.410115  | 1.805517  |
| 37 | 1 | 0 | 3.498515  | -1.134080 | -2.335224 |
| 38 | 1 | 0 | 6.371600  | 0.822981  | 0.199926  |
| 39 | 1 | 0 | 5.826904  | -0.449147 | -1.869837 |

-----

Conformer 6:

Energy = -714.965368 Hartree

Standard orientation:

-----

| Center<br>Number | Atomic<br>Number | Atomic<br>Type | Coordinates (Angstroms) |           |           |
|------------------|------------------|----------------|-------------------------|-----------|-----------|
|                  |                  |                | X                       | Y         | Z         |
| 1                | 6                | 0              | -1.601889               | -1.297221 | 1.401721  |
| 2                | 6                | 0              | -1.171079               | -0.986181 | -0.040667 |
| 3                | 6                | 0              | -1.962051               | 0.227585  | -0.562499 |
| 4                | 7                | 0              | -3.393677               | -0.013410 | -0.476586 |
| 5                | 6                | 0              | -3.825887               | -0.234745 | 0.896840  |
| 6                | 6                | 0              | -3.120196               | -1.454213 | 1.485779  |
| 7                | 6                | 0              | -4.201124               | 0.957672  | -1.207245 |
| 8                | 6                | 0              | -4.172972               | 2.410422  | -0.715164 |
| 9                | 6                | 0              | 1.005494                | 0.185945  | 0.517560  |
| 10               | 6                | 0              | 0.321786                | -0.783185 | -0.192265 |
| 11               | 6                | 0              | 3.123312                | -0.441255 | -0.557381 |
| 12               | 6                | 0              | 2.401045                | 0.384483  | 0.360617  |
| 13               | 6                | 0              | 1.054987                | -1.593254 | -1.100625 |
| 14               | 6                | 0              | 2.408835                | -1.431464 | -1.278389 |
| 15               | 6                | 0              | 4.520035                | -0.242150 | -0.712889 |
| 16               | 6                | 0              | 3.108598                | 1.378952  | 1.087278  |
| 17               | 6                | 0              | 5.176423                | 0.730132  | 0.005947  |
| 18               | 6                | 0              | 4.462978                | 1.548266  | 0.914722  |
| 19               | 1                | 0              | -1.285487               | -0.476259 | 2.061122  |
| 20               | 1                | 0              | -1.095109               | -2.202163 | 1.759072  |
| 21               | 1                | 0              | -1.462436               | -1.841580 | -0.665747 |

|    |   |   |           |           |           |
|----|---|---|-----------|-----------|-----------|
| 22 | 1 | 0 | -1.702889 | 0.410384  | -1.613122 |
| 23 | 1 | 0 | -1.646763 | 1.124892  | 0.006912  |
| 24 | 1 | 0 | -3.626394 | 0.642041  | 1.545932  |
| 25 | 1 | 0 | -4.912154 | -0.390069 | 0.894845  |
| 26 | 1 | 0 | -3.430780 | -2.348180 | 0.928738  |
| 27 | 1 | 0 | -3.433206 | -1.593541 | 2.528072  |
| 28 | 1 | 0 | -3.875972 | 0.928423  | -2.256154 |
| 29 | 1 | 0 | -5.237876 | 0.594788  | -1.192770 |
| 30 | 1 | 0 | -3.163858 | 2.835189  | -0.757448 |
| 31 | 1 | 0 | -4.819586 | 3.030171  | -1.347240 |
| 32 | 1 | 0 | -4.534798 | 2.498577  | 0.315287  |
| 33 | 1 | 0 | 0.476215  | 0.825003  | 1.222121  |
| 34 | 1 | 0 | 0.525774  | -2.358693 | -1.664612 |
| 35 | 1 | 0 | 2.948885  | -2.065783 | -1.978241 |
| 36 | 1 | 0 | 5.064459  | -0.873223 | -1.412189 |
| 37 | 1 | 0 | 2.559947  | 2.007661  | 1.785477  |
| 38 | 1 | 0 | 6.246262  | 0.874036  | -0.121340 |
| 39 | 1 | 0 | 4.991731  | 2.313462  | 1.477345  |

-----

Conformer 7:

Energy = -714.964354 Hartree

Standard orientation:

-----

| Center<br>Number | Atomic<br>Number | Atomic<br>Type | Coordinates (Angstroms) |           |           |
|------------------|------------------|----------------|-------------------------|-----------|-----------|
|                  |                  |                | X                       | Y         | Z         |
| 1                | 6                | 0              | -1.868782               | -2.166369 | 0.715907  |
| 2                | 6                | 0              | -1.271658               | -1.598614 | -0.589339 |
| 3                | 6                | 0              | -2.222008               | -0.538088 | -1.161829 |
| 4                | 7                | 0              | -2.577776               | 0.511996  | -0.209492 |
| 5                | 6                | 0              | -3.196600               | -0.054296 | 0.985553  |
| 6                | 6                | 0              | -2.261216               | -1.045351 | 1.672966  |
| 7                | 6                | 0              | -3.422038               | 1.514299  | -0.855429 |
| 8                | 6                | 0              | -3.611137               | 2.787233  | -0.037587 |
| 9                | 6                | 0              | 0.555878                | 0.149477  | -0.192650 |
| 10               | 6                | 0              | 0.171429                | -1.157572 | -0.415209 |
| 11               | 6                | 0              | 2.925874                | -0.506679 | -0.103277 |

|    |   |   |           |           |           |
|----|---|---|-----------|-----------|-----------|
| 12 | 6 | 0 | 1.921210  | 0.508256  | -0.035191 |
| 13 | 6 | 0 | 1.184436  | -2.156044 | -0.480634 |
| 14 | 6 | 0 | 2.513942  | -1.845911 | -0.329725 |
| 15 | 6 | 0 | 4.288053  | -0.142599 | 0.054105  |
| 16 | 6 | 0 | 2.323256  | 1.851280  | 0.190487  |
| 17 | 6 | 0 | 4.645312  | 1.168797  | 0.271554  |
| 18 | 6 | 0 | 3.652657  | 2.174959  | 0.340711  |
| 19 | 1 | 0 | -1.161908 | -2.859585 | 1.187751  |
| 20 | 1 | 0 | -2.765478 | -2.749200 | 0.459819  |
| 21 | 1 | 0 | -1.256525 | -2.416978 | -1.322949 |
| 22 | 1 | 0 | -3.132050 | -1.062238 | -1.523638 |
| 23 | 1 | 0 | -1.759829 | -0.063292 | -2.036137 |
| 24 | 1 | 0 | -3.443126 | 0.758611  | 1.675769  |
| 25 | 1 | 0 | -4.151222 | -0.564412 | 0.731997  |
| 26 | 1 | 0 | -1.365959 | -0.513340 | 2.019119  |
| 27 | 1 | 0 | -2.757068 | -1.456971 | 2.560657  |
| 28 | 1 | 0 | -2.938362 | 1.777845  | -1.804332 |
| 29 | 1 | 0 | -4.412698 | 1.089759  | -1.118712 |
| 30 | 1 | 0 | -2.641905 | 3.205842  | 0.255142  |
| 31 | 1 | 0 | -4.140576 | 3.536051  | -0.637045 |
| 32 | 1 | 0 | -4.200954 | 2.622294  | 0.869811  |
| 33 | 1 | 0 | -0.206868 | 0.921499  | -0.127607 |
| 34 | 1 | 0 | 0.892457  | -3.188988 | -0.662743 |
| 35 | 1 | 0 | 3.269820  | -2.626317 | -0.390285 |
| 36 | 1 | 0 | 5.048164  | -0.919344 | 0.000107  |
| 37 | 1 | 0 | 1.559228  | 2.624108  | 0.242873  |
| 38 | 1 | 0 | 5.692065  | 1.436417  | 0.391323  |
| 39 | 1 | 0 | 3.945583  | 3.207583  | 0.513051  |

-----

Conformer 8:

Energy = -714.964263 Hartree

Standard orientation:

-----

| Center<br>Number | Atomic<br>Number | Atomic<br>Type | Coordinates (Angstroms) |           |          |
|------------------|------------------|----------------|-------------------------|-----------|----------|
|                  |                  |                | X                       | Y         | Z        |
| 1                | 6                | 0              | -1.953387               | -2.200444 | 0.517927 |

-----

|    |   |   |           |           |           |
|----|---|---|-----------|-----------|-----------|
| 2  | 6 | 0 | -1.409617 | -1.406129 | -0.688304 |
| 3  | 6 | 0 | -2.347605 | -0.227538 | -0.989266 |
| 4  | 7 | 0 | -2.613794 | 0.625601  | 0.167077  |
| 5  | 6 | 0 | -3.174297 | -0.148989 | 1.272185  |
| 6  | 6 | 0 | -2.236342 | -1.274033 | 1.696147  |
| 7  | 6 | 0 | -3.490383 | 1.744240  | -0.172632 |
| 8  | 6 | 0 | -2.853128 | 2.782495  | -1.089625 |
| 9  | 6 | 0 | 0.505320  | 0.178770  | -0.078288 |
| 10 | 6 | 0 | 0.057405  | -1.050442 | -0.518424 |
| 11 | 6 | 0 | 2.847382  | -0.560813 | -0.230243 |
| 12 | 6 | 0 | 1.890041  | 0.456554  | 0.073803  |
| 13 | 6 | 0 | 1.023853  | -2.051771 | -0.819628 |
| 14 | 6 | 0 | 2.370447  | -1.819520 | -0.680647 |
| 15 | 6 | 0 | 4.229003  | -0.278736 | -0.074066 |
| 16 | 6 | 0 | 2.357104  | 1.719535  | 0.524148  |
| 17 | 6 | 0 | 4.649711  | 0.956065  | 0.365294  |
| 18 | 6 | 0 | 3.704036  | 1.964477  | 0.667192  |
| 19 | 1 | 0 | -1.252464 | -2.995645 | 0.799071  |
| 20 | 1 | 0 | -2.889947 | -2.690808 | 0.215054  |
| 21 | 1 | 0 | -1.467160 | -2.065455 | -1.565865 |
| 22 | 1 | 0 | -3.297046 | -0.644707 | -1.387774 |
| 23 | 1 | 0 | -1.909257 | 0.383194  | -1.784973 |
| 24 | 1 | 0 | -3.351254 | 0.534268  | 2.111926  |
| 25 | 1 | 0 | -4.159955 | -0.582058 | 0.996452  |
| 26 | 1 | 0 | -2.690147 | -1.833466 | 2.523361  |
| 27 | 1 | 0 | -1.299823 | -0.841826 | 2.070787  |
| 28 | 1 | 0 | -4.437843 | 1.383034  | -0.623079 |
| 29 | 1 | 0 | -3.765417 | 2.233676  | 0.770052  |
| 30 | 1 | 0 | -2.645254 | 2.390812  | -2.090575 |
| 31 | 1 | 0 | -3.531582 | 3.634557  | -1.208872 |
| 32 | 1 | 0 | -1.913235 | 3.150936  | -0.664235 |
| 33 | 1 | 0 | -0.221086 | 0.949086  | 0.168599  |
| 34 | 1 | 0 | 0.681145  | -3.022304 | -1.174608 |
| 35 | 1 | 0 | 3.089683  | -2.599550 | -0.922116 |
| 36 | 1 | 0 | 4.952912  | -1.056846 | -0.307481 |
| 37 | 1 | 0 | 1.629131  | 2.494160  | 0.755984  |
| 38 | 1 | 0 | 5.710835  | 1.161131  | 0.482038  |
| 39 | 1 | 0 | 4.047062  | 2.936279  | 1.013269  |

Conformer 9:

Energy = -714.963795 Hartree

Standard orientation:

```
-----
```

| Center<br>Number | Atomic<br>Number | Atomic<br>Type | Coordinates (Angstroms) |           |           |
|------------------|------------------|----------------|-------------------------|-----------|-----------|
|                  |                  |                | X                       | Y         | Z         |
| 1                | 6                | 0              | -1.535719               | -2.138844 | 0.635651  |
| 2                | 6                | 0              | -1.059243               | -1.358525 | -0.608463 |
| 3                | 6                | 0              | -2.240488               | -0.568852 | -1.195653 |
| 4                | 7                | 0              | -2.928191               | 0.277185  | -0.222481 |
| 5                | 6                | 0              | -3.424326               | -0.512262 | 0.900901  |
| 6                | 6                | 0              | -2.282915               | -1.234337 | 1.610507  |
| 7                | 6                | 0              | -3.983276               | 1.048634  | -0.875157 |
| 8                | 6                | 0              | -4.546343               | 2.176531  | -0.017393 |
| 9                | 6                | 0              | 1.431496                | -1.137628 | -0.507296 |
| 10               | 6                | 0              | 0.194939                | -0.542318 | -0.340239 |
| 11               | 6                | 0              | 2.584642                | 0.912857  | 0.187345  |
| 12               | 6                | 0              | 2.642845                | -0.447389 | -0.250844 |
| 13               | 6                | 0              | 0.154029                | 0.812154  | 0.091738  |
| 14               | 6                | 0              | 1.310270                | 1.514017  | 0.344305  |
| 15               | 6                | 0              | 3.796227                | 1.606790  | 0.443254  |
| 16               | 6                | 0              | 3.913994                | -1.058865 | -0.418002 |
| 17               | 6                | 0              | 5.012308                | 0.985730  | 0.274107  |
| 18               | 6                | 0              | 5.071125                | -0.360407 | -0.160731 |
| 19               | 1                | 0              | -2.215505               | -2.935307 | 0.299037  |
| 20               | 1                | 0              | -0.684072               | -2.629152 | 1.121926  |
| 21               | 1                | 0              | -0.784803               | -2.101340 | -1.369506 |
| 22               | 1                | 0              | -2.944794               | -1.300721 | -1.644904 |
| 23               | 1                | 0              | -1.885262               | 0.071081  | -2.012970 |
| 24               | 1                | 0              | -4.175282               | -1.257422 | 0.559544  |
| 25               | 1                | 0              | -3.933259               | 0.154159  | 1.604210  |
| 26               | 1                | 0              | -1.599324               | -0.491869 | 2.041620  |
| 27               | 1                | 0              | -2.687295               | -1.822651 | 2.443385  |
| 28               | 1                | 0              | -3.548209               | 1.485502  | -1.782782 |
| 29               | 1                | 0              | -4.808447               | 0.388642  | -1.212900 |
| 30               | 1                | 0              | -3.740996               | 2.828401  | 0.338586  |
| 31               | 1                | 0              | -5.240356               | 2.781719  | -0.611130 |

```
-----
```

|    |   |   |           |           |           |
|----|---|---|-----------|-----------|-----------|
| 32 | 1 | 0 | -5.099179 | 1.808967  | 0.853160  |
| 33 | 1 | 0 | 1.490412  | -2.171083 | -0.847804 |
| 34 | 1 | 0 | -0.817229 | 1.282280  | 0.215634  |
| 35 | 1 | 0 | 1.257308  | 2.550722  | 0.671420  |
| 36 | 1 | 0 | 3.747206  | 2.641527  | 0.776271  |
| 37 | 1 | 0 | 3.957730  | -2.093403 | -0.752233 |
| 38 | 1 | 0 | 5.933766  | 1.526864  | 0.473454  |
| 39 | 1 | 0 | 6.037543  | -0.840916 | -0.290836 |

---

## 13. Substrate synthesis and characterisation

### 13.1. General

Commercially available chemicals and reagents were purchased from Sigma-Aldrich (Poole, Dorset, UK), Prozomix (Haltwhistle, Northumberland, UK), Alfa Aesar (Karlsruhe, Germany), Acros Organics (Geel, Belgium) or Fluorochem (Hadfield, Derbyshire, UK) unless stated otherwise. HPLC solvents were obtained from Sigma-Aldrich (Poole, Dorset, UK) or ROMIL (Waterbeach, Cambridge, UK) and GC gases from BOC gases (Guildford, UK). Many pyridine compounds were commercially available including compounds such as 3-methylpyridine, 3-phenylpyridine, 3-(4-methoxyphenyl)pyridine, 3-(thiophen-2-yl)pyridine, 4-methylpyridine, 4-phenylpyridine, 3-(4-bromophenyl)pyridine, 4-(pyridin-3-yl)aniline, 3,4-dimethylpyridine, 5,6,7,8-tetrahydroisoquinoline and 4-methyl-3-phenylpyridine were purchased from Sigma-Aldrich (Poole, Dorset, UK) or Fluorochem (Hadfield, Derbyshire, UK). Alkylating agents such as iodoethane, 1-iodopropane, iodomethane, allyl bromide, propargyl bromide and benzyl bromide were purchased from Sigma-Aldrich (Poole, Dorset, UK) or Fluorochem (Hadfield, Derbyshire, UK).

#### 13.1.1. General Method 2: Suzuki–Miyaura Coupling for the preparation of pyridines

Based on the procedure of Yang<sup>15</sup>, under nitrogen, a round bottom flask was sequentially charged with Pd(OAc)<sub>2</sub> (79 mg, 0.35 mmol), XPhos (210 mg, 0.44 mmol), 3-chloropyridine (2.00 g, 17.61 mmol, 1 equiv.), boronic acid (21.14 mmol, 1.2 equiv.), and 100 mL of degassed *n*-butanol. The mixture was prestirred at room temperature for 15 min, and then a solution of CsOH·H<sub>2</sub>O (5.03 g, 29.94 mmol) in 25 mL of degassed H<sub>2</sub>O was added in one portion to initiate the Suzuki reaction. The reaction mixture was stirred vigorously at room temperature until all the 3-chloropyridine was consumed (monitored by GC-MS). The mixture was concentrated *in vacuo* and the aqueous phase was extracted with DCM (25 mL). The organic phase was extracted with 2 M aqueous HCl (3 x 25 mL) and the combined aqueous phases were basified to pH 12 by addition of 5 M NaOH. The product was extracted into DCM (2 x 25 mL). The organic phase was dried over anhydrous MgSO<sub>4</sub> and concentrated *in vacuo* to afford the corresponding pyridine.

#### 3-(3-methoxyphenyl)pyridine

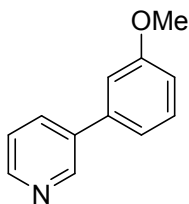

Following General Method 2 with (3-methoxyphenyl)boronic acid (3.21 g, 21.14 mmol) and subjecting the crude product to acid and base wash afforded the title compound as a yellow oil product (3.00 g, 16.20 mmol, 92%). **<sup>1</sup>H NMR** (400 MHz, CDCl<sub>3</sub>): δ 8.84 (dd, *J* = 2.4, 0.9 Hz, 1H), 8.58 (dd, *J* = 4.8, 1.6 Hz, 1H), 7.85 (ddd, *J* = 7.8, 2.4, 1.6 Hz, 1H), 7.41 – 7.31 (m, 2H), 7.16 (ddd, *J* = 7.8, 1.7, 1.0 Hz, 1H), 7.10 (dd, *J* = 2.6, 1.3 Hz, 1H), 6.94 (ddd, *J* = 8.3, 2.6, 1.3 Hz, 1H), 3.86 (s, 3H); **<sup>13</sup>C NMR** (100 MHz, CDCl<sub>3</sub>): δ 160.2, 148.7, 148.4, 139.4, 136.6, 134.5, 130.2, 123.6, 119.7, 113.5, 113.0, 55.4; **HRMS** calcd. for C<sub>12</sub>H<sub>12</sub>NO<sup>+</sup> 186.0913 [M+H]<sup>+</sup>, found 186.0921.

### 3-(3-(methylsulfonyl)phenyl)pyridine

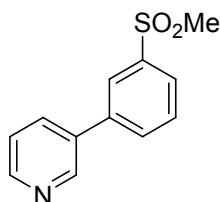

Following General Method 2 with (3-(methylsulfonyl)phenyl)boronic acid (3.84 g, 19.20 mmol) and subjecting the crude product to acid and base wash afforded the title compound as a white solid product (2.49 g, 10.67 mmol, 61%). **<sup>1</sup>H NMR** (400 MHz, CDCl<sub>3</sub>): 8.87 – 8.82 (m, 1H), 8.64 (dd, *J* = 4.9, 1.5 Hz, 1H), 8.16 – 8.11 (m, 1H), 8.00 – 7.82 (m, 3H), 7.68 (t, *J* = 7.8 Hz, 1H), 7.40 (dd, *J* = 8.0, 4.9 Hz, 1H), 3.10 (s, 3H); **<sup>13</sup>C NMR** (100 MHz, CDCl<sub>3</sub>): δ 149.6, 148.3, 141.7, 139.5, 134.8, 134.6, 132.3, 130.4, 126.9, 126.0, 123.9, 44.6; **HRMS** calcd. for C<sub>12</sub>H<sub>12</sub>NO<sub>2</sub>S<sup>+</sup> 234.0583 [M+H]<sup>+</sup>, found 234.0584.

### 3-(4-fluorophenyl)pyridine

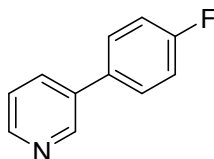

Following General Method 2 with (4-fluorophenyl)boronic acid (2.96 g, 21.14 mmol) and subjecting the crude product to acid and base wash afforded the title compound as a yellow oil product (2.99 g,



17.26 mmol, 98%). **<sup>1</sup>H NMR** (400 MHz, CDCl<sub>3</sub>): δ 8.79 (dd, *J* = 2.4, 0.9 Hz, 1H), 8.57 (dd, *J* = 4.8, 1.6 Hz, 1H), 7.80 (ddd, *J* = 7.9, 2.4, 1.7 Hz, 1H), 7.57 – 7.47 (m, 2H), 7.34 (ddd, *J* = 7.9, 4.8, 0.9 Hz, 1H), 7.20 – 7.11 (m, 2H); **<sup>13</sup>C NMR** (100 MHz, CDCl<sub>3</sub>): δ 164.6, 162.1, 148.9, 148.6, 136.1, 134.6, 134.4, 129.2, 124.0, 116.6, 116.4; **HRMS** calcd. for C<sub>11</sub>H<sub>9</sub>FN<sup>+</sup> 174.0714 [M+H]<sup>+</sup>, found 174.0718.

### 3-(naphthalen-2-yl)pyridine

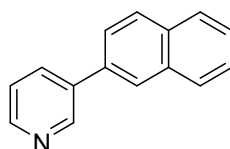

Following General Method 2 with naphthalen-2-ylboronic acid (3.64 g, 21.14 mmol) and subjecting the crude product to acid and base wash afforded the title compound as a cream coloured solid product (2.71 g, 13.18 mmol, 75%). **<sup>1</sup>H NMR** (400 MHz, CDCl<sub>3</sub>): δ 8.99 (dd, *J* = 2.4, 0.9 Hz, 1H), 8.63 (dd, *J* = 4.8, 1.8 Hz, 1H), 8.08 – 7.84 (m, 5H), 7.72 (dd, *J* = 8.5, 1.8 Hz, 1H), 7.59 – 7.46 (m, 2H), 7.41 (ddd, *J* = 7.9, 4.8, 0.9 Hz, 1H); **<sup>13</sup>C NMR** (100 MHz, CDCl<sub>3</sub>): δ 148.7, 148.7, 136.7, 135.3, 134.7, 133.7, 133.0, 129.0, 128.4, 127.9, 126.8, 126.6, 126.3, 125.2, 123.8; **HRMS** calcd. for C<sub>15</sub>H<sub>12</sub>N<sup>+</sup> 206.0964 [M+H]<sup>+</sup>, found 206.0956.

### 3-(furan-2-yl)pyridine

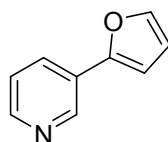

Following General Method 2 with furan-2-ylboronic acid (2.40 g, 21.14 mmol) and subjecting the crude product to acid and base wash afforded the title compound as a yellow oil product (1.96 g, 13.50 mmol, 77%). **<sup>1</sup>H NMR** (400 MHz, CDCl<sub>3</sub>): δ 8.91 (d, *J* = 2.3 Hz, 1H), 8.46 (dd, *J* = 4.9, 1.7 Hz, 1H), 7.90 (dt, *J* = 7.9, 2.0 Hz, 1H), 7.49 (d, *J* = 1.7 Hz, 1H), 7.27 (ddd, *J* = 8.1, 4.8, 1.0 Hz, 1H), 6.72 (d, *J* = 3.4 Hz, 1H), 6.48 (dd, *J* = 3.4, 1.8 Hz, 1H); **<sup>13</sup>C NMR** (100 MHz, CDCl<sub>3</sub>): δ 151.1, 148.3, 145.5, 143.1, 130.8, 126.9, 123.6, 111.9, 106.5; **HRMS** calcd. for C<sub>9</sub>H<sub>8</sub>NO<sup>+</sup> 146.0600 [M+H]<sup>+</sup>, found 146.0604<sup>15</sup>.

### 3-methyl-4-phenylpyridine

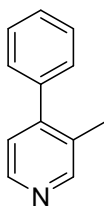

Following General Method 2 with 4-bromo-3-methylpyridine (2.30 g, 13.37 mmol) and phenylboronic acid (3.26 g, 26.74 mmol) and subjecting the crude product to acid and base wash. The title compound was isolated as a mixture (1.96 g, 11.58 mmol, 87%). **<sup>1</sup>H NMR** (400 MHz, CDCl<sub>3</sub>): δ 8.44 (s, 1H), 8.41 (d, *J* = 5.0 Hz, 1H), 7.48 – 7.34 (m, 3H), 7.31 – 7.25 (m, 2H), 7.13 (d, *J* = 5.0 Hz, 1H), 2.25 (s, 3H); **<sup>13</sup>C NMR** (100 MHz, CDCl<sub>3</sub>): δ 151.0, 150.0, 149.5, 147.1, 146.7, 139.0, 130.8, 128.6, 128.5, 128.1, 124.2, 123.3, 17.3; **HRMS** calcd. for C<sub>12</sub>H<sub>12</sub>N<sup>+</sup> 170.0964 [M+H]<sup>+</sup>, found 170.0958.

#### ***N*-(4-(pyridin-3-yl)phenyl)acetamide**

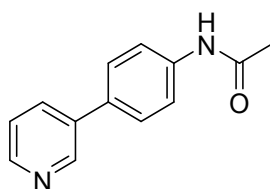

To a mixture of commercially available 4-(pyridin-3-yl)aniline (2.00 g, 11.75 mmol) and triethylamine (3.57g, 35.25 mmol) in THF (200 mL) was added acetyl chloride (1.84 g, 23.50 mmol) at room temperature. The reaction mixture was stirred vigorously at room temperature until all the 4-(pyridin-3-yl)aniline was consumed (monitored by GC-MS). Acetamide was removed *in vacuo* to yield crude product which was carried forward without further purification (2.23 g, 10.51 mmol, 89%). **<sup>1</sup>H NMR** (400 MHz, CDCl<sub>3</sub>): δ 8.98 (s, 1H), 8.78 – 8.73 (m, 1H), 8.50 (dd, *J* = 4.8, 1.5 Hz, 1H), 7.82 (dt, *J* = 8.2, 2.0 Hz, 1H), 7.75 (d, *J* = 8.2 Hz, 2H), 7.46 (d, *J* = 8.2 Hz, 2H), 7.32 (dd, *J* = 8.2, 4.9 Hz, 1H), 2.21 (s, 3H); **<sup>13</sup>C NMR** (100 MHz, CDCl<sub>3</sub>): δ 174.2, 169.3, 147.7, 147.6, 139.0, 136.4, 134.3, 132.8, 127.4, 123.8, 120.5, 24.6; **HRMS** calcd. for C<sub>13</sub>H<sub>12</sub>N<sub>2</sub>O<sup>+</sup> 212.0950 [M+H]<sup>+</sup>, found 212.0948.

#### **13.1.2. General Method 3: *N*-alkylation for the preparation of pyridinium salts (1a-21a)**

Based on the procedure of Baldwin<sup>16</sup>, to a stirred solution of pyridine (1 equiv.) in acetone (0.62 ml/mmol of pyridine) was added alkyl or allyl halide (1 equiv.) and the reaction mixture was heated at reflux for 5 h under nitrogen. Acetone was removed *in vacuo* to yield crude product. The crude was

trituration with diethyl ether (3 x 30 mL) followed by concentration *in vacuo* to afford the corresponding pyridinium salt.

### 3-(3-methoxyphenyl)-1-propylpyridinium iodide (1a)

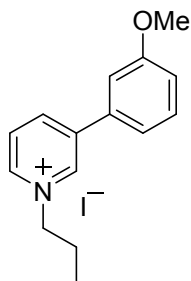

Following General Method 3 with 3-(3-methoxyphenyl)pyridine (1.54 g, 8.31 mmol) and 1-iodopropane (1.41 g, 8.31 mmol) afforded a viscous brown oil crude which was carried forward without trituration (2.56 g, 7.21 mmol, 87%). **<sup>1</sup>H NMR** (500 MHz, CDCl<sub>3</sub>): δ 9.59 (t, *J* = 1.7 Hz, 1H), 9.28 (d, *J* = 6.0 Hz, 1H), 8.64 (dt, *J* = 8.3, 1.5 Hz, 1H), 8.15 (dd, *J* = 8.3, 6.0 Hz, 1H), 7.43 – 7.34 (m, 3H), 6.99 (dt, *J* = 7.5, 2.3 Hz, 1H), 5.05 (t, *J* = 7.5 Hz, 2H), 3.90 (s, 3H), 2.09 (p, *J* = 7.5 Hz, 2H), 1.00 (t, *J* = 7.5 Hz, 3H); **<sup>13</sup>C NMR** (126 MHz, CDCl<sub>3</sub>): δ 160.7, 142.9, 142.4, 141.2, 133.9, 130.9, 128.5, 120.0, 117.1, 112.7, 63.3, 56.5, 25.5, 10.5; **HRMS** calcd. for C<sub>15</sub>H<sub>18</sub>NO<sup>+</sup> 228.1383 [M-I]<sup>+</sup>, found 228.1382.

### 3-(3-(methylsulfonyl)phenyl)-1-propylpyridinium iodide (2a)

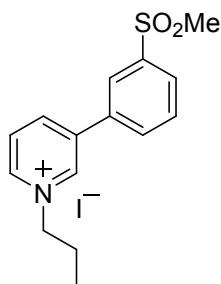

Following General Method 3 with 3-(3-(methylsulfonyl)phenyl)pyridine (3.37 g, 14.45 mmol) and iodoethane (2.25 g, 14.45 mmol) afforded the title compound as a hygroscopic brown powder (3.57 g, 8.85 mmol, 61%). **<sup>1</sup>H NMR** (400 MHz, DMSO-d<sub>6</sub>) δ 9.64 (s, 1H), 9.17 (d, *J* = 6.0 Hz, 1H), 9.04 (dd, *J* = 8.1, 1.8 Hz, 1H), 8.44 (d, *J* = 2.0 Hz, 1H), 8.35 – 8.25 (m, 2H), 8.11 (dd, *J* = 7.4, 1.7 Hz, 1H), 7.91 (t, *J* = 7.8 Hz, 1H), 4.69 (t, *J* = 7.4 Hz, 2H), 3.35 (s, 3H), 2.05 (h, *J* = 7.4 Hz, 2H), 0.94 (t, *J* = 7.4 Hz, 3H);

$^{13}\text{C}$  NMR (100 MHz, DMSO-d<sub>6</sub>)  $\delta$  143.6, 143.4, 143.3, 142.0, 138.1, 134.5, 132.7, 130.6, 128.3, 128.1, 126.1, 62.4, 43.5, 24.2, 10.3; HRMS calcd. for C<sub>15</sub>H<sub>18</sub>NO<sub>2</sub>S<sup>+</sup> 276.1053 [M-I]<sup>+</sup>, found 276.1043.

### 1-allyl-3-(4-bromophenyl)pyridinium bromide (3a)

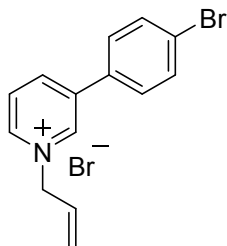

Following General Method 3 with commercially available 3-(4-bromophenyl)pyridine (1.00 g, 4.27 mmol) and allyl bromide (0.52 g, 4.272 mmol) afforded the title compound as a hygroscopic cream coloured powder (1.37 g, 3.86 mmol, 90%).  $^1\text{H}$  NMR (500 MHz, CD<sub>3</sub>OD):  $\delta$  9.39 (s, 1H), 8.98 (d,  $J$  = 6.0 Hz, 1H), 8.90 (dd,  $J$  = 8.2, 1.8 Hz, 1H), 8.21 (dd,  $J$  = 8.2, 6.3 Hz, 1H), 7.84 – 7.74 (m, 4H), 6.27 (ddt,  $J$  = 16.8, 10.2, 6.3 Hz, 1H), 5.62 (d,  $J$  = 17.0 Hz, 1H), 5.58 (d,  $J$  = 10.2 Hz, 1H), 5.40 (d,  $J$  = 6.3 Hz, 2H);  $^{13}\text{C}$  NMR (126 MHz, CD<sub>3</sub>OD):  $\delta$  144.6, 144.1, 141.7, 133.9, 133.7, 131.9, 130.5, 129.6, 126.0, 123.9, 64.9; HRMS calcd. for C<sub>14</sub>H<sub>13</sub>BrN<sup>+</sup> 274.0226 [M-Br]<sup>+</sup>, found 274.0234.

### 3-(4-acetamidophenyl)-1-allylpyridinium bromide (4a)

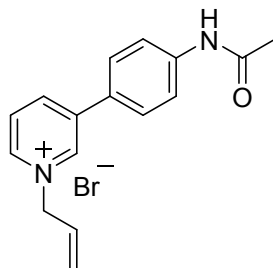

Following General Method 3 with *N*-(4-(pyridin-3-yl)phenyl)acetamide (1.83 g, 8.62 mmol) and allyl bromide (1.04 g, 8.62 mmol) afforded hygroscopic a pale-brown powder crude which was carried forward without further purification (2.59 g, 7.77 mmol, 90%).  $^1\text{H}$  NMR (400 MHz, CD<sub>3</sub>OD):  $\delta$  9.33 (s, 1H), 8.92 – 8.83 (m, 2H), 8.20 – 8.12 (m, 1H), 7.83 (s, 4H), 6.26 (ddt,  $J$  = 16.8, 10.1, 6.4 Hz, 1H), 5.65 – 5.54 (m, 2H), 5.36 (d,  $J$  = 6.4 Hz, 2H), 2.18 (s, 3H);  $^{13}\text{C}$  NMR (100 MHz, CD<sub>3</sub>OD):  $\delta$  172.0, 144.0, 143.6, 143.3, 142.4, 142.4, 132.0, 129.5, 129.5, 129.2, 123.7, 121.6, 64.8, 24.0; HRMS calcd. for C<sub>16</sub>H<sub>17</sub>N<sub>2</sub>O<sup>+</sup> 253.1335 [M-Br]<sup>+</sup>, found 253.1326.

### 1-ethyl-3-phenylpyridinium iodide (5a)

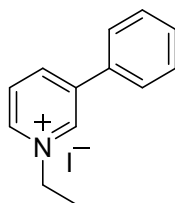

Following General Method 3 with commercially available 3-phenylpyridine (2.00 g, 6.43 mmol) and iodoethane (1.00 g, 6.43 mmol) afforded the title compound as a hygroscopic pale-yellow powder (1.84 g, 5.92 mmol, 92%). **<sup>1</sup>H NMR** (400 MHz, (CD<sub>3</sub>)<sub>2</sub>SO): δ 9.52 (t, *J* = 1.6 Hz, 1H), 9.17 – 9.08 (m, 1H), 8.96 – 8.89 (m, 1H), 8.29 – 8.20 (m, 1H), 7.98 – 7.90 (m, 2H), 7.68 – 7.53 (m, 3H), 4.74 (q, *J* = 7.3 Hz, 2H), 1.62 (t, *J* = 7.3 Hz, 3H); **<sup>13</sup>C NMR** (100 MHz, (CD<sub>3</sub>)<sub>2</sub>SO): δ 142.7, 142.5, 139.5, 133.1, 130.1, 129.4, 128.0, 127.5, 56.6, 16.4; **HRMS** calcd. for C<sub>13</sub>H<sub>14</sub>N<sup>+</sup> 184.1121 [M-I]<sup>+</sup>, found 184.1130.

### 1-ethyl-3-(4-fluorophenyl)pyridinium iodide (6a)

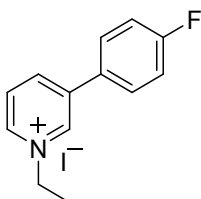

Following General Method 3 with 3-(4-fluorophenyl)pyridine (2.00 g, 11.55 mmol) and iodoethane (1.80 g, 11.55 mmol) afforded the title compound as a hygroscopic cream coloured powder (3.61 g, 10.97 mmol, 95%). **<sup>1</sup>H NMR** (400 MHz, CDCl<sub>3</sub>): δ 9.65 (t, *J* = 1.7 Hz, 1H), 9.33 – 9.26 (m, 1H), 8.64 (dt, *J* = 8.4, 1.6 Hz, 1H), 8.17 (dd, *J* = 8.4, 6.0 Hz, 1H), 8.00 – 7.91 (m, 2H), 7.19 (t, *J* = 8.4 Hz, 2H), 5.13 (q, *J* = 7.3 Hz, 2H), 1.71 (t, *J* = 7.3 Hz, 3H); **<sup>13</sup>C NMR** (100 MHz, CDCl<sub>3</sub>): δ 165.6, 142.7, 142.4, 142.2, 140.6, 130.3, 130.2, 128.8, 117.2, 117.0, 57.8, 17.5; **HRMS** calcd. for C<sub>13</sub>H<sub>13</sub>FN<sup>+</sup> 202.1027 [M-I]<sup>+</sup>, found 202.1034.

### 1-ethyl-3-(4-methoxyphenyl)pyridinium iodide (7a)

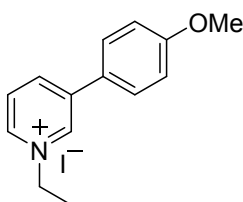

Following General Method 3 with commercially available 3-(4-methoxyphenyl)pyridine (1.00 g, 5.40 mmol) and iodoethane (0.84 g, 5.40 mmol) afforded the title compound as a hygroscopic pale-yellow powder (1.76 g, 5.16 mmol, 95%). **<sup>1</sup>H NMR** (400 MHz, CDCl<sub>3</sub>): δ 9.56 (t, *J* = 1.7 Hz, 1H), 9.18 (dt, *J* = 6.2, 1.3 Hz, 1H), 8.58 (dt, *J* = 8.4, 1.4 Hz, 1H), 8.10 (dd, *J* = 8.4, 6.0 Hz, 1H), 7.91 – 7.83 (m, 2H), 7.05 – 6.97 (m, 2H), 5.10 (q, *J* = 7.3 Hz, 2H), 3.81 (s, 3H), 1.70 (t, *J* = 7.3 Hz, 3H); **<sup>13</sup>C NMR** (100 MHz, CDCl<sub>3</sub>): δ 161.8, 141.8, 141.2, 129.3, 128.6, 124.6, 115.4, 57.7, 55.7, 17.6; **HRMS** calcd. for C<sub>14</sub>H<sub>16</sub>NO<sup>+</sup> 214.1226 [M-I]<sup>+</sup>, found 214.1234.

#### 1-ethyl-3-(furan-2-yl)pyridinium iodide (8a)

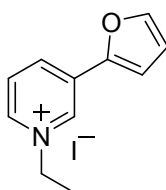

Following General Method 3 with 3-(furan-2-yl)pyridine (1.00 g, 6.89 mmol) and iodoethane (1.07 g, 6.89 mmol) afforded the title compound as a hygroscopic orange powder (1.77 g, 5.88 mmol, 85%). **<sup>1</sup>H NMR** (400 MHz, CDCl<sub>3</sub>): δ 9.85 (d, *J* = 1.8 Hz, 1H), 9.19 (dt, *J* = 6.1, 1.3 Hz, 1H), 8.61 (dt, *J* = 8.3, 1.5 Hz, 1H), 8.10 (dd, *J* = 8.3, 6.0 Hz, 1H), 7.62 (dd, *J* = 13.2, 2.7 Hz, 2H), 6.57 (dd, *J* = 3.6, 1.8 Hz, 1H), 5.10 (q, *J* = 7.3 Hz, 2H), 1.77 – 1.68 (m, 3H); **<sup>13</sup>C NMR** (100 MHz, CDCl<sub>3</sub>): δ 146.2, 145.7, 141.5, 139.3, 137.9, 131.7, 128.8, 113.9, 113.4, 57.7, 17.6; **HRMS** calcd. for C<sub>11</sub>H<sub>12</sub>NO<sup>+</sup> 174.0913 [M-I]<sup>+</sup>, found 174.0918.

#### 1-ethyl-3-(thiophen-2-yl)pyridinium iodide (9a)

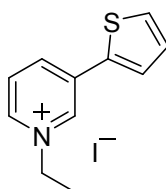

Following General Method 3 with commercially available 3-(thiophen-2-yl)pyridine (1.00 g, 6.20 mmol) and iodoethane (0.97 g, 6.89 mmol) afforded the title compound as a hygroscopic pale-yellow powder (1.59 g, 5.01 mmol, 81%). **<sup>1</sup>H NMR** (400 MHz, CDCl<sub>3</sub>): δ 9.80 (s, 1H), 9.18 (d, *J* = 6.0 Hz, 1H), 8.51 (d, *J* = 8.2 Hz, 1H), 8.12 – 8.02 (m, 2H), 7.51 (d, *J* = 5.1 Hz, 1H), 7.14 (dd, *J* = 5.1, 3.8 Hz, 1H), 5.11

(q,  $J = 7.3$  Hz, 2H), 1.71 (t,  $J = 7.3$  Hz, 3H);  $^{13}\text{C NMR}$  (100 MHz,  $\text{CDCl}_3$ ):  $\delta$  141.7, 140.5, 135.6, 134.8, 129.9, 129.7, 129.6, 128.8, 57.6, 17.6; **HRMS** calcd. for  $\text{C}_{11}\text{H}_{12}\text{NS}^+$  190.0685  $[\text{M-I}]^+$ , found 190.0689.

### 1-ethyl-3-(naphthalen-2-yl)pyridinium iodide (10a)

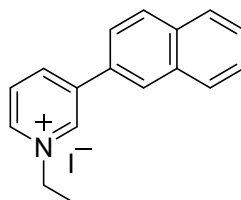

Following General Method 3 with 3-(naphthalen-2-yl)pyridine (1.00 g, 4.87 mmol) and iodoethane (0.76 g, 4.87 mmol) afforded the title compound as a hygroscopic pale-yellow powder (1.06 g, 4.43 mmol, 60%).  $^1\text{H NMR}$  (400 MHz,  $(\text{CD}_3)_2\text{SO}$ ):  $\delta$  9.65 (t,  $J = 1.4$  Hz, 1H), 9.12 (dt,  $J = 6.0, 1.4$  Hz, 1H), 9.07 (dt,  $J = 8.4, 1.4$  Hz, 1H), 8.56 (d,  $J = 1.9$  Hz, 1H), 8.29 (dd,  $J = 8.4, 6.0$  Hz, 1H), 8.18 (d,  $J = 8.4$  Hz, 1H), 8.11 – 8.00 (m, 3H), 7.70 – 7.61 (m, 2H), 4.74 (q,  $J = 7.3$  Hz, 2H), 1.65 (t,  $J = 7.3$  Hz, 3H);  $^{13}\text{C NMR}$  (100 MHz,  $(\text{CD}_3)_2\text{SO}$ ):  $\delta$  143.0, 142.7, 142.6, 139.5, 133.3, 132.9, 130.5, 129.2, 128.5, 128.1, 127.8, 127.7, 127.4, 127.2, 124.4, 56.8, 16.5; **HRMS** calcd. for  $\text{C}_{17}\text{H}_{16}\text{N}^+$  234.1277  $[\text{M-I}]^+$ , found 234.1268.

### 1-methyl-3-phenylpyridinium iodide (11a)

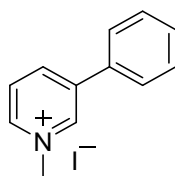

Following General Method 3 with commercially available 3-phenylpyridine (1.00 g, 6.44 mmol) and iodomethane (0.91 g, 6.44 mmol) afforded the title compound as a hygroscopic pale-yellow powder (1.86 g, 6.26 mmol, 97%).  $^1\text{H NMR}$  (400 MHz,  $\text{CDCl}_3$ ): 9.39 (t,  $J = 1.7$  Hz, 1H), 9.18 (dd,  $J = 6.0, 1.4$  Hz, 1H), 8.58 (dt,  $J = 8.3, 1.5$  Hz, 1H), 8.12 (dd,  $J = 8.3, 6.0$  Hz, 1H), 7.90 – 7.80 (m, 2H), 7.56 – 7.44 (m, 3H), 4.74 (s, 3H);  $^{13}\text{C NMR}$  (100 MHz,  $\text{CDCl}_3$ ):  $\delta$  143.5, 143.3, 142.8, 141.3, 132.7, 130.8, 130.0, 128.4, 127.9, 50.0; **HRMS** calcd. for  $\text{C}_{12}\text{H}_{12}\text{N}^+$  170.0965  $[\text{M-I}]^+$ , found 170.0962.

### 3-phenyl-1-(prop-2-yn-1-yl)pyridinium bromide (12a)

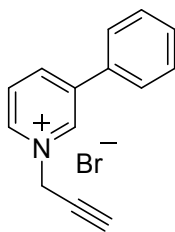

Following General Method 3 with commercially available 3-phenylpyridine (2.00 g, 12.89 mmol) and 3-bromopropyne (1.53 g, 12.89 mmol) afforded the title compound as a hygroscopic brown powder (1.49 g, 11.86 mmol, 92%). **<sup>1</sup>H NMR** (400 MHz, CD<sub>3</sub>OD): δ 9.43 (t, *J* = 1.8 Hz, 1H), 9.13 (dt, *J* = 6.1, 1.4 Hz, 1H), 8.94 (dt, *J* = 8.3, 1.5 Hz, 1H), 8.24 (dd, *J* = 8.3, 6.1 Hz, 1H), 7.90 – 7.80 (m, 2H), 7.67 – 7.55 (m, 3H), 5.70 (d, *J* = 2.6 Hz, 2H), 3.59 (t, *J* = 2.6 Hz, 1H); **<sup>13</sup>C NMR** (100 MHz, CD<sub>3</sub>OD): δ 145.3, 143.8, 143.5, 142.9, 134.5, 131.7, 130.9, 129.6, 128.6, 81.6, 75.1, 51.7; **HRMS** calcd. for C<sub>14</sub>H<sub>12</sub>N<sup>+</sup> 194.0964 [M-Br]<sup>+</sup>, found 194.0960.

#### 1-ethyl-3-methylpyridinium iodide (13a)

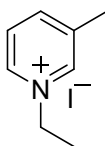

Following General Method 3 with commercially available 3-methylpyridine (4.79 g, 51.38 mmol) and iodoethane (8.01 g, 51.38 mmol) afforded the title compound as a hygroscopic white powder (12.15 g, 48.78 mmol, 95%). **<sup>1</sup>H NMR** (400 MHz, CDCl<sub>3</sub>): δ 9.40 (s, 1H), 9.22 (d, *J* = 6.1 Hz, 1H), 8.30 (d, *J* = 8.0 Hz, 1H), 8.02 (dd, *J* = 8.0, 6.1 Hz, 1H), 4.94 (q, *J* = 7.3 Hz, 2H), 2.64 (s, 3H), 1.71 (t, *J* = 7.3 Hz, 3H); **<sup>13</sup>C NMR** (100 MHz, CDCl<sub>3</sub>): δ 146.1, 144.3, 141.8, 139.9, 128.1, 57.3, 19.9, 17.4; **HRMS** calcd. for C<sub>8</sub>H<sub>12</sub>N<sup>+</sup> 122.0964 [M-I]<sup>+</sup>, found 122.0962. Spectroscopic data in accord with previously published reports.<sup>16</sup>

#### 1-benzyl-3-methylpyridinium bromide (14a)

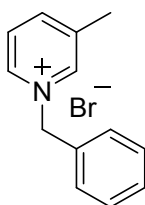



Following General Method 3 with commercially available 3-methylpyridine (4.60 g, 49.39 mmol) and (bromomethyl)benzene (8.45 g, 49.39 mmol) afforded the title compound as a hygroscopic white powder (12.12 g, 45.88 mmol, 93%). **<sup>1</sup>H NMR** (400 MHz, (CD<sub>3</sub>)<sub>2</sub>SO): δ 9.47 (s, 1H), 9.35 – 9.29 (m, 1H), 8.69 – 8.61 (m, 1H), 8.26 (dd, *J* = 8.0, 6.1 Hz, 1H), 7.81 – 7.71 (m, 2H), 7.64 – 7.52 (m, 3H), 6.05 (s, 2H), 2.65 (s, 3H); **<sup>13</sup>C NMR** (100 MHz, (CD<sub>3</sub>)<sub>2</sub>SO): δ 146.3, 144.2, 142.0, 139.2, 134.4, 129.3, 129.1, 128.8, 127.7, 62.9, 17.9. Spectroscopic data in accord with previously published reports.<sup>17</sup>

#### 1-ethyl-4-methylpyridinium iodide (15a)

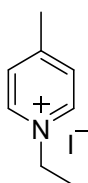

Following General Method 3 with commercially available 4-methylpyridine (4.80 g, 51.54 mmol) and iodoethane (8.04 g, 51.54 mmol) afforded the title compound as a hygroscopic white powder (11.83 g, 47.49 mmol, 92%). **<sup>1</sup>H NMR** (400 MHz, CDCl<sub>3</sub>): δ 9.30 – 9.24 (m, 2H), 7.89 (d, *J* = 6.3 Hz, 2H), 4.91 (q, *J* = 7.4 Hz, 2H), 2.66 (s, 3H), 1.68 (t, *J* = 7.4 Hz, 3H); **<sup>13</sup>C NMR** (100 MHz, CDCl<sub>3</sub>): δ 159.1, 143.9, 129.1, 56.7, 22.5, 17.3; **HRMS** calcd. for C<sub>8</sub>H<sub>12</sub>N<sup>+</sup> 122.0964 [M-I]<sup>+</sup>, found 122.0970.

#### 1-ethyl-4-phenylpyridinium iodide (16a)

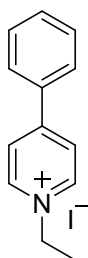

Following General Method 3 with commercially available 4-phenylpyridine (2.50 g, 16.11 mmol) and iodoethane (2.51 g, 16.11 mmol) afforded the title compound as a hygroscopic yellow powder (4.91 g, 15.78 mmol, 98%). **<sup>1</sup>H NMR** (400 MHz, (CD<sub>3</sub>)<sub>2</sub>SO): δ 9.17 – 9.10 (m, 2H), 8.57 – 8.50 (m, 2H), 8.13 – 8.04 (m, 2H), 7.71 – 7.60 (m, 3H), 4.63 (q, *J* = 7.3 Hz, 2H), 1.57 (t, *J* = 7.3 Hz, 3H); **<sup>13</sup>C NMR** (100 MHz, (CD<sub>3</sub>)<sub>2</sub>SO): δ 154.6, 144.6, 133.6, 132.1, 129.7, 128.1, 124.5, 55.5, 16.3; **HRMS** calcd. for C<sub>13</sub>H<sub>14</sub>N<sup>+</sup> 184.1121 [M-I]<sup>+</sup>, found 184.1114.

### 1-ethyl-3,4-dimethylpyridinium iodide (17a)

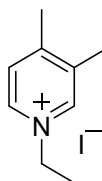

Following General Method 3 with commercially available 3,4-dimethylpyridine (2.50 g, 23.33 mmol) and iodoethane (3.64 g, 23.33 mmol) afforded the title compound as a hygroscopic white powder (5.92 g, 22.50 mmol, 96%). **<sup>1</sup>H NMR** (400 MHz, (CD<sub>3</sub>)<sub>2</sub>SO): δ 8.96 (s, 1H), 8.85 (dd, *J* = 6.2, 1.6 Hz, 1H), 7.96 (d, *J* = 6.2 Hz, 1H), 4.55 (q, *J* = 7.3 Hz, 2H), 2.53 (s, 3H), 2.40 (s, 3H), 1.52 (t, *J* = 7.3 Hz, 3H); **<sup>13</sup>C NMR** (100 MHz, (CD<sub>3</sub>)<sub>2</sub>SO): δ 157.5, 142.5, 141.1, 137.5, 127.9, 55.3, 19.6, 16.3, 16.2; **HRMS** calcd. for C<sub>9</sub>H<sub>14</sub>N<sup>+</sup> 136.1121 [M-I]<sup>+</sup>, found 136.1126.

### 2-ethyl-5,6,7,8-tetrahydroisoquinolinium iodide (18a)

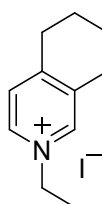

Following General Method 3 with commercially available 5,6,7,8-tetrahydroisoquinoline (1.00 g, 7.51 mmol) and iodoethane (1.17 g, 7.51 mmol) afforded the title compound as a hygroscopic white powder (1.26 g, 4.36 mmol, 58%). **<sup>1</sup>H NMR** (400 MHz, CDCl<sub>3</sub>): δ 9.23 (s, 1H), 8.91 (dd, *J* = 6.3, 1.5 Hz, 1H), 7.71 (d, *J* = 6.3 Hz, 1H), 4.85 (q, *J* = 7.3 Hz, 2H), 3.00 (dd, *J* = 21.8, 5.6 Hz, 4H), 1.88 (p, *J* = 3.2 Hz, 4H), 1.68 (t, *J* = 7.3 Hz, 3H); **<sup>13</sup>C NMR** (100 MHz, CDCl<sub>3</sub>): δ 158.2, 143.7, 140.1, 139.1, 128.2, 56.5, 29.8, 26.4, 21.1, 21.0, 17.3

### 1-ethyl-4-methyl-3-phenylpyridinium iodide (19a)

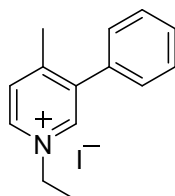

Following General Method 3 with commercially available 4-methyl-3-phenylpyridine (0.52 g, 3.07 mmol) and iodoethane (0.47 g, 3.07 mmol) afforded the title compound as a hygroscopic brown powder (0.87 g, 2.68 mmol, 87%). **<sup>1</sup>H NMR** (400 MHz, CDCl<sub>3</sub>): δ 9.37 (d, *J* = 6.4 Hz, 1H), 8.65 (s, 1H), 8.00 (d, *J* = 6.4 Hz, 1H), 7.54 (d, *J* = 6.4 Hz, 3H), 7.48 (dd, *J* = 7.0, 2.0 Hz, 2H), 5.02 (q, *J* = 7.4 Hz, 2H), 2.56 (s, 3H), 1.73 (t, *J* = 7.4 Hz, 3H); **<sup>13</sup>C NMR** (100 MHz, CDCl<sub>3</sub>): δ 156.9, 142.5, 142.5, 142.2, 133.0, 129.9, 129.8, 129.3, 129.3, 57.1, 21.4, 17.1; **HRMS** calcd. for C<sub>14</sub>H<sub>16</sub>N<sup>+</sup> 198.1227 [M-I]<sup>+</sup>, found 198.1229.

#### 1-allyl-4-methyl-3-phenylpyridinium bromide (20a)

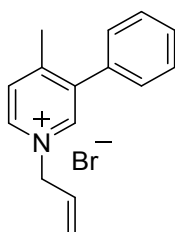

Following General Method 3 with commercially available 4-methyl-3-phenylpyridine (1.00 g, 5.91 mmol) and allyl bromide (0.71 g, 5.91 mmol) afforded the title compound as a hygroscopic pale-brown powder (1.59 g, 5.48 mmol, 93%). **<sup>1</sup>H NMR** (400 MHz, CD<sub>3</sub>OD): δ 8.88 – 8.78 (m, 2H), 8.07 (d, *J* = 6.4 Hz, 1H), 7.64 – 7.55 (m, 3H), 7.55 – 7.47 (m, 2H), 6.22 (ddt, *J* = 16.7, 10.3, 6.4 Hz, 1H), 5.61 – 5.51 (m, 2H), 5.27 (dd, *J* = 6.4, 1.4 Hz, 2H), 2.59 (s, 3H); **<sup>13</sup>C NMR** (100 MHz, CD<sub>3</sub>OD): δ 144.8, 143.5, 143.1, 135.1, 132.0, 130.7, 130.7, 130.4, 130.2, 123.5, 63.8, 21.1; **HRMS** calcd. for C<sub>15</sub>H<sub>16</sub>N<sup>+</sup> 210.1277 [M-Br]<sup>+</sup>, found 210.1268.

#### 1-allyl-3-methyl-4-phenylpyridinium bromide (21a)

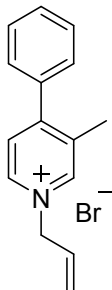

Following General Method 3 with 3-methyl-4-phenylpyridine (1.96 g, 11.59 mmol) and allyl bromide (1.40 g, 11.59 mmol) afforded a viscous brown oil crude which was carried forward without trituration (1.81 g, 6.24 mmol, 54%). **<sup>1</sup>H NMR** (400 MHz, CDCl<sub>3</sub>): δ 9.50 (s, 1H), 9.28 (dd, *J* = 6.3, 1.5 Hz, 1H),

7.81 (d,  $J = 6.3$  Hz, 1H), 7.59 – 7.49 (m, 3H), 7.42 – 7.33 (m, 2H), 6.20 (ddt,  $J = 16.8, 10.1, 6.7$  Hz, 1H), 5.78 – 5.59 (m, 4H), 2.55 (s, 3H);  $^{13}\text{C NMR}$  (100 MHz,  $\text{CDCl}_3$ ):  $\delta$  145.5, 142.0, 137.1, 135.2, 134.3, 130.6, 130.4, 129.3, 128.5, 128.2, 124.4, 118.4, 62.8, 18.2; **HRMS** calcd. for  $\text{C}_{15}\text{H}_{16}\text{N}^+$  210.1277  $[\text{M-Br}]^+$ , found 210.1271.

#### 13.1.3. General Method 4: Pyridinium salt reduction for the preparation of THPs (1b-21b)

To a solution of pyridinium salt (1 equiv.) in methanol: $\text{H}_2\text{O}$  (9:1, 2.5 mL/mmol of pyridinium salt) was added  $\text{NaBH}_4$  (2 equiv.) at  $-78$  °C. The reaction mixture was stirred at  $-30$  to  $-40$  °C for 30 min, then allowed to warm to room temperature over 1 h. The reaction mixture was then quenched with saturated aqueous  $\text{NaHCO}_3$ . The aqueous phase was separated and extracted with DCM ( $3 \times 20$  mL). The combined organic extracts were washed with brine, dried over anhydrous  $\text{MgSO}_4$  and concentrated *in vacuo* to give the crude product. The crude was purified by gradient flash column chromatography on silica (DCM:methanol) to afford the corresponding THP.

#### 5-(3-methoxyphenyl)-1-propyl-1,2,3,6-THP (1b)

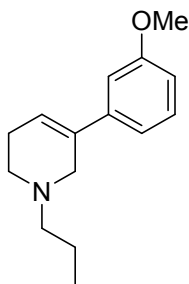

Following General Method 4 with 3-(3-methoxyphenyl)-1-propylpyridinium iodide (**1a**) (2.95 g, 8.31 mmol), sodium borohydride (2 equiv.) was added at  $0$  °C. The reaction mixture was stirred at  $0$  °C for 30 min, then allowed to warm to room temperature over 1 h. The crude product was subjected to flash column chromatography on silica (gradient elution from 99:1 to 98:2 DCM:methanol) afforded the title compound as an orange oil (1.62 g, 7.00 mmol, 84%).  $^1\text{H NMR}$  (500 MHz,  $\text{CDCl}_3$ ):  $\delta$  7.22 (t,  $J = 8.1$  Hz, 1H), 6.96 – 6.91 (m, 1H), 6.90 – 6.86 (m, 1H), 6.79 (dd,  $J = 8.1, 2.6$  Hz, 1H), 6.14 – 6.09 (m, 1H), 3.81 (s, 3H), 3.33 (q,  $J = 2.4$  Hz, 2H), 2.62 (t,  $J = 5.8$  Hz, 2H), 2.52 – 2.45 (m, 2H), 2.41 – 2.33 (m, 2H), 1.62 (h,  $J = 7.4$  Hz, 2H), 0.95 (t,  $J = 7.4$  Hz, 3H);  $^{13}\text{C NMR}$  (126 MHz,  $\text{CDCl}_3$ ):  $\delta$  159.7, 142.0, 135.5, 129.4, 123.0, 117.8, 112.3, 111.2, 60.7, 55.4, 54.9, 49.7, 26.6, 20.4, 12.2; **HRMS** calcd. for  $\text{C}_{15}\text{H}_{22}\text{NO}^+$  232.1696  $[\text{M+H}]^+$ , found 232.1694.

### 3-(1-propyl-1,2,5,6-tetrahydropyridin-3-yl)phenol

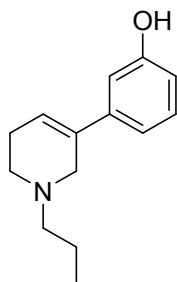

5-(3-methoxyphenyl)-1-propyl-1,2,3,6-THP (**1b**) (0.50 g, 2.16 mmol) was stirred in aqueous HBr (48% in H<sub>2</sub>O, 15 mL, 132.59 mmol) at 100 °C for 3 h. The reaction mixture was cooled over ice and basified to pH 12 by addition of 5 M NaOH. The product was extracted into DCM (3 x 10 mL). The organic phase was dried over anhydrous MgSO<sub>4</sub> and concentrated *in vacuo* to afford the title compound as a pale-yellow oil (0.34 g, 1.56 mmol, 72%). **<sup>1</sup>H NMR** (400 MHz, CDCl<sub>3</sub>): δ 7.15 (t, *J* = 7.7 Hz, 1H), 6.78 – 6.69 (m, 3H), 5.89 (tt, *J* = 3.8, 1.8 Hz, 1H), 3.41 – 3.35 (m, 2H), 2.70 (t, *J* = 5.8 Hz, 2H), 2.58 – 2.49 (m, 2H), 2.41 – 2.31 (m, 2H), 1.75 – 1.61 (m, 2H), 0.95 (t, *J* = 7.3 Hz, 3H); **<sup>13</sup>C NMR** (100 MHz, CDCl<sub>3</sub>): δ 157.1, 142.2, 135.7, 129.7, 123.4, 117.2, 115.5, 113.4, 61.0, 54.8, 50.2, 25.8, 19.6, 12.2; **HRMS** calcd. for C<sub>14</sub>H<sub>20</sub>NO<sup>+</sup> 218.1539 [M+H]<sup>+</sup>, found 218.1541.

### 5-(3-(methylsulfonyl)phenyl)-1-propyl-1,2,3,6-THP (**2b**)

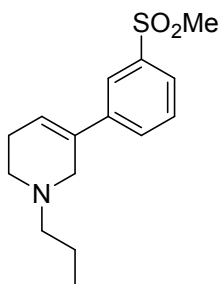

Following General Method 4 with 3-(3-(methylsulfonyl)phenyl)-1-propylpyridinium iodide (**2a**) (1.69 g, 4.20 mmol), sodium borohydride (2 equiv.) was added at 0 °C. The reaction mixture was stirred at 0 °C for 30 min, then allowed to warm to room temperature over 1 h. The crude product was subjected to flash column chromatography on silica (gradient elution from 99.5:0.5 to 95:5 DCM:methanol) to afford the title compound as a yellow oil (0.70 g, 2.51 mmol, 60%). **<sup>1</sup>H NMR** (400 MHz, CDCl<sub>3</sub>): δ 7.88 (d, *J* = 1.8 Hz, 1H), 7.79 (dd, *J* = 7.9, 1.8 Hz, 1H), 7.61 (dd, *J* = 7.9, 1.8 Hz, 1H), 7.50 (t, *J* = 7.9 Hz, 1H), 6.24 (td, *J* = 4.0, 2.1 Hz, 1H), 3.34 (q, *J* = 2.1 Hz, 2H), 3.05 (d, *J* = 1.3 Hz, 3H), 2.62 (t, *J* = 5.8

Hz, 2H), 2.53 – 2.45 (m, 2H), 2.39 (dt,  $J = 6.8, 3.2$  Hz, 2H), 1.61 (h,  $J = 7.4$  Hz, 2H), 0.94 (t,  $J = 7.4$  Hz, 3H);  $^{13}\text{C NMR}$  (100 MHz,  $\text{CDCl}_3$ ):  $\delta$  141.9, 140.8, 134.1, 130.2, 129.5, 125.7, 125.5, 123.8, 60.6, 54.6, 49.4, 44.7, 26.7, 20.4, 12.1; **HRMS** calcd. for  $\text{C}_{15}\text{H}_{21}\text{NO}_2\text{S}^+$  279.1293  $[\text{M}+\text{H}]^+$ , found 279.1287.

### 1-allyl-5-(4-bromophenyl)-1,2,3,6-THP (3b)

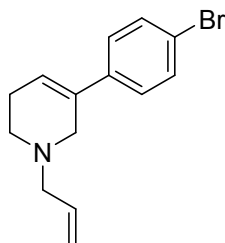

Following General Method 4 with 1-allyl-3-(4-bromophenyl)pyridinium bromide (**3a**) (1.00 g, 2.82 mmol), sodium borohydride (2 equiv.) was added at 0 °C. The reaction mixture was stirred at 0 °C for 30 min, then allowed to warm to room temperature over 1 h. The crude product was subjected on a short pad of silica (elution 9:1 DCM:methanol) to afford the title compound as a bright yellow oil (0.70 g, 2.52 mmol, 89%).  $^1\text{H NMR}$  (400 MHz,  $\text{CDCl}_3$ ):  $\delta$  7.45 – 7.37 (m, 2H), 7.23 – 7.15 (m, 2H), 6.11 (tt,  $J = 3.9, 1.8$  Hz, 1H), 6.02 – 5.87 (m, 1H), 5.30 – 5.20 (m, 1H), 5.20 – 5.14 (m, 1H), 3.29 (q,  $J = 2.4$  Hz, 2H), 3.21 – 3.14 (m, 2H), 2.61 (t,  $J = 5.8$  Hz, 2H), 2.39 – 2.30 (m, 2H);  $^{13}\text{C NMR}$  (100 MHz,  $\text{CDCl}_3$ ):  $\delta$  139.2, 135.3, 134.6, 131.5, 126.7, 123.4, 120.9, 118.2, 61.6, 54.4, 49.1, 26.6; **HRMS** calcd. for  $\text{C}_{14}\text{H}_{17}\text{BrN}^+$  278.0539  $[\text{M}+\text{H}]^+$ , found 278.0528.

### N-(4-(1-allyl-1,2,5,6-tetrahydropyridin-3-yl)phenyl)acetamide

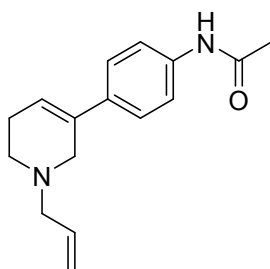

Following General Method 4 with 3-(4-acetamidophenyl)-1-allylpyridinium bromide (**4a**) (1.00 g, 3.00 mmol), sodium borohydride (2 equiv.) was added at 0 °C. The reaction mixture was stirred at 0 °C for 30 min, then allowed to warm to room temperature over 1 h. The crude product was subjected to flash column chromatography on silica (gradient elution from 99.5:0.5 to 98:2 DCM:methanol) to afford the title compound as an orange oil (0.55 g, 2.14 mmol, 71%).  $^1\text{H NMR}$  (400 MHz,  $\text{CDCl}_3$ ):  $\delta$  7.47 (d,  $J =$

8.3 Hz, 2H), 7.36 – 7.28 (m, 3H), 6.16 – 6.09 (m, 1H), 6.07 – 5.92 (m, 1H), 5.26 (dd,  $J = 25.8, 13.7$  Hz, 2H), 3.38 – 3.32 (m, 2H), 3.22 (d,  $J = 6.5$  Hz, 2H), 2.65 (t,  $J = 5.8$  Hz, 2H), 2.45 – 2.36 (m, 2H), 2.21 (s, 3H);  $^{13}\text{C NMR}$  (100 MHz,  $\text{CDCl}_3$ ):  $\delta$  168.3, 136.8, 136.4, 135.4, 134.8, 125.7, 122.2, 119.8, 118.1, 61.7, 54.6, 49.3, 26.6, 24.8; **HRMS** calcd. for  $\text{C}_{16}\text{H}_{21}\text{N}_2\text{O}^+$  257.1648  $[\text{M}+\text{H}]^+$ , found 257.1639.

#### 4-(1-allyl-1,2,5,6-tetrahydropyridin-3-yl)aniline (4b)

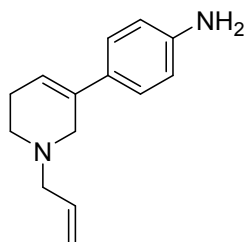

*N*-(4-(1-allyl-1,2,5,6-tetrahydropyridin-3-yl)phenyl)acetamide (250 mg, 0.98 mmol) was stirred in aqueous 2 M HCl (25 mL, 50 mmol) at 50 °C for 3 h. The reaction mixture was cooled over ice and basified to pH 12 by addition of 5 M NaOH. The product was extracted into DCM (3 x 10 mL). The organic phase was dried over anhydrous  $\text{MgSO}_4$  and concentrated *in vacuo* to afford the title compound as a yellow oil (203 mg, 0.95 mmol, 97%).  $^1\text{H NMR}$  (400 MHz,  $\text{CDCl}_3$ ):  $\delta$  7.19 – 7.11 (m, 2H), 6.67 – 6.59 (m, 2H), 6.04 – 5.89 (m, 2H), 5.29 – 5.14 (m, 2H), 3.63 (s, 0H), 3.29 (q,  $J = 2.4$  Hz, 2H), 3.21 – 3.14 (m, 2H), 2.60 (t,  $J = 5.8$  Hz, 2H), 2.38 – 2.29 (m, 2H);  $^{13}\text{C NMR}$  (100 MHz,  $\text{CDCl}_3$ ):  $\delta$  145.6, 135.6, 135.1, 130.9, 126.1, 119.9, 118.0, 115.1, 61.7, 54.8, 49.4, 26.5; **HRMS** calcd. for  $\text{C}_{14}\text{H}_{19}\text{N}_2^+$  215.1534  $[\text{M}+\text{H}]^+$ , found 215.1526.

#### 1-ethyl-5-phenyl-1,2,3,6-THP (5b)

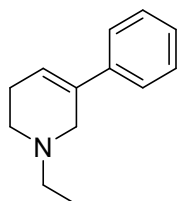

Following General Method 4 with 1-ethyl-3-phenylpyridinium iodide (**5a**) (2.50 g, 8.03 mmol) and subjecting the crude product to flash column chromatography on silica (gradient elution from 98:2 to 95:5 DCM:methanol) afforded the title compound as a yellow oil (1.31 g, 6.99 mmol, 87%).  $^1\text{H NMR}$  (400 MHz,  $\text{CDCl}_3$ ):  $\delta$  7.36 – 7.22 (m, 4H), 7.22 – 7.16 (m, 1H), 6.08 (tt,  $J = 3.9, 1.8$  Hz, 1H), 3.31 (q,  $J = 2.5$  Hz, 2H), 2.62 – 2.52 (m, 4H), 2.35 (tt,  $J = 5.9, 2.9$  Hz, 2H), 1.16 (t,  $J = 7.2$  Hz, 3H);  $^{13}\text{C NMR}$

(100 MHz, CDCl<sub>3</sub>):  $\delta$  140.5, 135.5, 128.4, 127.0, 125.1, 122.7, 54.5, 52.3, 49.3, 26.6, 12.4; **HRMS** calcd. for C<sub>13</sub>H<sub>18</sub>N<sup>+</sup> 188.1434 [M+H]<sup>+</sup>, found 188.1427.

#### 1-ethyl-5-(4-fluorophenyl)-1,2,3,6-THP (6b)

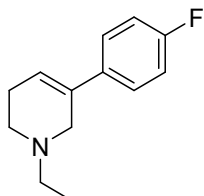

Following General Method 4 with 1-ethyl-3-(4-fluorophenyl)pyridinium iodide (**6a**) (1.00 g, 3.04 mmol) and subjecting the crude product to flash column chromatography on silica (gradient elution from 99:1 to 98:2 DCM:methanol) afforded the title compound as a pale-yellow oil (0.55 g, 2.68 mmol, 88%). **<sup>1</sup>H NMR** (400 MHz, CDCl<sub>3</sub>):  $\delta$  7.34 – 7.24 (m, 2H), 7.04 – 6.94 (m, 2H), 6.04 (tt,  $J$  = 3.9, 1.8 Hz, 1H), 3.29 (td,  $J$  = 2.7, 1.8 Hz, 2H), 2.64 – 2.55 (m, 4H), 2.41 – 2.32 (m, 2H), 1.18 (t,  $J$  = 7.2 Hz, 3H); **<sup>13</sup>C NMR** (100 MHz, CDCl<sub>3</sub>):  $\delta$  163.4, 160.9, 136.7, 134.8, 126.8, 126.7, 122.7, 115.3, 115.1, 54.7, 52.4, 49.3, 26.7, 12.5; **HRMS** calcd. for C<sub>13</sub>H<sub>17</sub>FN<sup>+</sup> 206.1340 [M+H]<sup>+</sup>, found 206.1344.

#### 1-ethyl-5-(4-methoxyphenyl)-1,2,3,6-THP (7b)

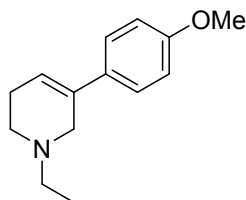

Following General Method 4 with 1-ethyl-3-(4-methoxyphenyl)pyridinium iodide (**7a**) (1.00 g, 2.93 mmol) and subjecting the crude product to flash column chromatography on silica (gradient elution from 98:2 to 95:5 DCM:methanol) afforded the title compound as a pale-yellow oil (0.39 g, 1.79 mmol, 61%). **<sup>1</sup>H NMR** (400 MHz, CDCl<sub>3</sub>):  $\delta$  7.32 – 7.23 (m, 2H), 6.89 – 6.81 (m, 2H), 6.01 (tt,  $J$  = 3.8, 1.8 Hz, 1H), 3.80 (d,  $J$  = 1.2 Hz, 3H), 3.31 (q,  $J$  = 2.4 Hz, 2H), 2.65 – 2.58 (m, 4H), 2.36 (tt,  $J$  = 5.9, 3.0 Hz, 2H), 1.19 (t,  $J$  = 7.2 Hz, 3H); **<sup>13</sup>C NMR** (100 MHz, CDCl<sub>3</sub>):  $\delta$  158.8, 134.9, 133.1, 126.3, 121.2, 113.8, 55.4, 54.6, 52.3, 49.4, 26.6, 12.4; **HRMS** calcd. for C<sub>14</sub>H<sub>20</sub>NO<sup>+</sup> 218.1539 [M+H]<sup>+</sup>, found 218.1539.

#### 1-ethyl-5-(furan-2-yl)-1,2,3,6-THP (8b)



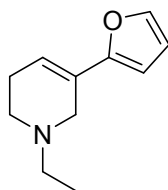

Following General Method 4 with 1-ethyl-3-(furan-2-yl)pyridinium iodide (**8a**) (1.00 g, 3.32 mmol) and subjecting the crude product to flash column chromatography on silica (gradient elution from 99:1 to 98:2 DCM:methanol) afforded the title compound as a red oil (0.44 g, 2.48 mmol, 74%). **<sup>1</sup>H NMR** (400 MHz, CDCl<sub>3</sub>): δ 7.32 (d, *J* = 1.8 Hz, 1H), 6.35 (dd, *J* = 3.3, 1.8 Hz, 1H), 6.28 (tt, *J* = 4.0, 1.8 Hz, 1H), 6.14 (d, *J* = 3.3 Hz, 1H), 3.23 (q, *J* = 2.4 Hz, 2H), 2.64 – 2.54 (m, 4H), 2.41 – 2.31 (m, 2H), 1.18 (t, *J* = 7.2 Hz, 3H); **<sup>13</sup>C NMR** (100 MHz, CDCl<sub>3</sub>): δ 153.5, 141.3, 126.4, 120.3, 111.0, 103.7, 52.2, 51.9, 49.5, 26.0, 12.4; **HRMS** calcd. for C<sub>11</sub>H<sub>16</sub>NO<sup>+</sup> 178.1226 [M+H]<sup>+</sup>, found 178.1224.

#### 1-ethyl-5-(thiophen-2-yl)-1,2,3,6-THP (**9b**)

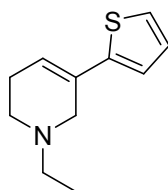

Following General Method 4 with 1-ethyl-3-(thiophen-2-yl)pyridinium iodide (**9a**) (1.00 g, 3.15 mmol) and subjecting the crude product to flash column chromatography on silica (gradient elution from 99:1 to 98:2 DCM:methanol) afforded the title compound as a brown oil (0.31 g, 1.60 mmol, 52%). **<sup>1</sup>H NMR** (400 MHz, CDCl<sub>3</sub>): δ 7.10 (dd, *J* = 5.1, 1.2 Hz, 1H), 6.94 (dd, *J* = 5.1, 3.7 Hz, 1H), 6.90 (d, *J* = 3.7 Hz, 1H), 6.17 (tt, *J* = 4.0, 1.7 Hz, 1H), 3.33 (q, *J* = 2.4 Hz, 2H), 2.63 – 2.51 (m, 4H), 2.34 (tt, *J* = 5.8, 2.9 Hz, 2H), 1.18 (t, *J* = 7.2 Hz, 3H); **<sup>13</sup>C NMR** (100 MHz, CDCl<sub>3</sub>): δ 144.2, 130.1, 127.2, 123.1, 121.9, 121.2, 54.2, 52.1, 49.3, 26.4, 12.4; **HRMS** calcd. for C<sub>11</sub>H<sub>16</sub>NS<sup>+</sup> 194.0998 [M+H]<sup>+</sup>, found 194.1002.

#### 1-ethyl-5-(naphthalen-2-yl)-1,2,3,6-THP (**10b**)

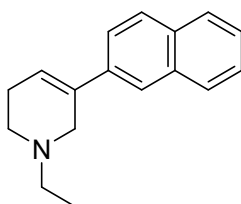

Following General Method 4 with 1-ethyl-3-(naphthalen-2-yl)pyridinium iodide (**10a**) (1.00 g, 2.77 mmol) and subjecting the crude product to flash column chromatography on silica (gradient elution from 99:1 to 98:2 DCM:methanol) afforded the title compound as a colourless oil (0.43 g, 1.81 mmol, 65%). **<sup>1</sup>H NMR** (400 MHz, CDCl<sub>3</sub>): δ 7.87 – 7.76 (m, 3H), 7.76 – 7.71 (m, 1H), 7.57 (dd, *J* = 8.6, 1.9 Hz, 1H), 7.51 – 7.39 (m, 2H), 6.30 (tt, *J* = 3.9, 1.8 Hz, 1H), 3.49 (q, *J* = 2.4 Hz, 2H), 2.71 – 2.61 (m, 4H), 2.45 (tt, *J* = 5.8, 3.0 Hz, 2H), 1.24 (t, *J* = 7.2 Hz, 3H); **<sup>13</sup>C NMR** (100 MHz, CDCl<sub>3</sub>): δ 137.5, 135.2, 133.5, 132.7, 128.1, 127.9, 127.6, 126.2, 125.7, 123.9, 123.4, 123.2, 54.4, 52.3, 49.3, 26.7, 12.4; **HRMS** calcd. for C<sub>17</sub>H<sub>20</sub>N<sup>+</sup> 238.1590 [M+H]<sup>+</sup>, found 238.1588.

### 1-methyl-5-phenyl-1,2,3,6-THP (**11b**)

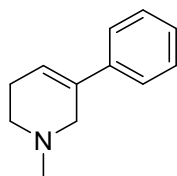

Following General Method 4 with 1-methyl-3-phenylpyridinium iodide (**11a**) (1.00 g, 3.37 mmol) and subjecting the crude product to flash column chromatography on silica (gradient elution from 98:2 to 95:5 DCM:methanol) afforded the title compound as a pale-yellow oil (0.35 g, 2.02 mmol, 60%). **<sup>1</sup>H NMR** (400 MHz, CDCl<sub>3</sub>): δ 7.29 – 7.08 (m, 5H), 6.03 (tt, *J* = 3.9, 1.8 Hz, 1H), 3.21 (td, *J* = 2.7, 1.8 Hz, 2H), 2.49 (t, *J* = 5.8 Hz, 2H), 2.38 (s, 3H), 2.35 – 2.26 (m, 2H); **<sup>13</sup>C NMR** (100 MHz, CDCl<sub>3</sub>): δ 140.2, 135.4, 128.4, 127.1, 125.1, 122.2, 56.5, 51.6, 46.1, 26.6; **HRMS** calcd. for C<sub>12</sub>H<sub>16</sub>N<sup>+</sup> 174.1277 [M+H]<sup>+</sup>, found 174.1278.

### 5-phenyl-1-(prop-2-yn-1-yl)-1,2,3,6-THP (**12b**)

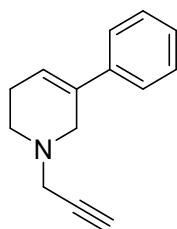

Following General Method 4 with 3-phenyl-1-(prop-2-yn-1-yl)pyridinium bromide (**12a**) (1.00 g, 3.65 mmol) and subjecting the crude product to flash column chromatography on silica (gradient elution from 99.5:0.5 to 99:1 DCM:methanol) afforded the title compound as a yellow oil (0.43 g, 2.17 mmol, 60%). **<sup>1</sup>H NMR** (400 MHz, CDCl<sub>3</sub>): δ 7.43 – 7.35 (m, 4H), 7.35 – 7.26 (m, 2H), 6.16 (tt, *J* = 3.7, 1.8

Hz, 1H), 3.54 (dd,  $J = 17.0, 2.5$  Hz, 4H), 2.77 (t,  $J = 5.8$  Hz, 2H), 2.44 (tt,  $J = 6.0, 3.0$  Hz, 2H);  $^{13}\text{C}$  NMR (100 MHz,  $\text{CDCl}_3$ ):  $\delta$  140.2, 135.4, 128.5, 127.2, 125.2, 122.2, 78.9, 73.4, 53.0, 48.4, 46.8, 26.6; HRMS calcd. for  $\text{C}_{14}\text{H}_{15}\text{N}^+$  197.1204  $[\text{M}+\text{H}]^+$ , found 197.1211.

#### 1-ethyl-5-methyl-1,2,3,6-THP (13b)

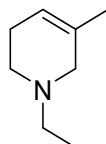

Following General Method 4 with 1-ethyl-3-methylpyridinium iodide (**13a**) (5.00 g, 20.07 mmol) and subjecting the crude product to flash column chromatography on silica (gradient elution from 99:1 to 95:5 DCM:methanol) afforded the title compound as a colourless oil (1.21 g, 9.66 mmol, 48%).  $^1\text{H}$  NMR (400 MHz,  $\text{CDCl}_3$ ):  $\delta$  5.46 – 5.38 (m, 1H), 2.84 – 2.77 (m, 2H), 2.50 – 2.41 (m, 4H), 2.18 – 2.08 (m, 2H), 1.66 – 1.60 (m, 3H), 1.11 (t,  $J = 7.2$  Hz, 3H);  $^{13}\text{C}$  NMR (100 MHz,  $\text{CDCl}_3$ ):  $\delta$  132.3, 119.5, 56.7, 52.3, 49.6, 26.2, 21.2, 12.4; HRMS calcd. for  $\text{C}_8\text{H}_{16}\text{N}^+$  126.1277  $[\text{M}+\text{H}]^+$ , found 126.1274.

#### 1-benzyl-5-methyl-1,2,3,6-THP (14b)

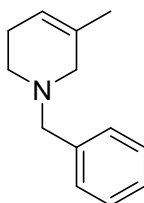

Following General Method 4 with 1-benzyl-3-methylpyridinium bromide (**14a**) (5.00 g, 18.93 mmol) and subjecting the crude product to flash column chromatography on silica (gradient elution from 99:1 to 95:5 DCM:methanol) afforded the title compound as a yellow oil (2.41 g, 12.87 mmol, 68%).  $^1\text{H}$  NMR (400 MHz,  $\text{CDCl}_3$ ):  $\delta$  7.34 – 7.15 (m, 5H), 5.43 – 5.35 (m, 1H), 3.53 (s, 2H), 2.82 – 2.76 (m, 2H), 2.44 (t,  $J = 5.8$  Hz, 2H), 2.11 – 2.02 (m, 2H), 1.60 – 1.54 (m, 3H);  $^{13}\text{C}$  NMR (100 MHz,  $\text{CDCl}_3$ ):  $\delta$  138.5, 132.4, 129.3, 128.3, 127.1, 119.6, 63.0, 57.2, 49.6, 26.1, 21.2; HRMS calcd. for  $\text{C}_{13}\text{H}_{18}\text{N}^+$  188.1434  $[\text{M}+\text{H}]^+$ , found 188.1429.

#### 1-ethyl-4-methyl-1,2,3,6-THP (15b)

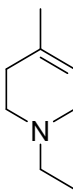

Following General Method 4 with 1-ethyl-4-methylpyridinium iodide (**15a**) (5.00 g, 20.07 mmol) and subjecting the crude product to a short pad of silica (elution 9:1 DCM:methanol) afforded the title compound as a pale-yellow oil (1.95 g, 15.57 mmol, 78%). **<sup>1</sup>H NMR** (400 MHz, CDCl<sub>3</sub>): δ 5.38 – 5.31 (m, 1H), 2.92 – 2.84 (m, 2H), 2.51 (t, *J* = 5.8 Hz, 2H), 2.43 (q, *J* = 7.2 Hz, 2H), 2.11 – 2.03 (m, 2H), 1.67 – 1.62 (m, 3H), 1.09 (t, *J* = 7.2 Hz, 3H); **<sup>13</sup>C NMR** (100 MHz, CDCl<sub>3</sub>): δ 132.8, 119.3, 52.5, 52.2, 50.2, 31.1, 23.0, 12.5.

#### 1-ethyl-4-phenyl-1,2,3,6-THP (16b)

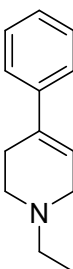

Following General Method 4 with 1-ethyl-4-phenylpyridinium iodide (**16a**) (2.00 g, 6.43 mmol) and subjecting the crude product to a short pad of silica (elution 9:1 DCM:methanol) afforded the title compound as a yellow oil (1.03 g, 5.50 mmol, 85%). **<sup>1</sup>H NMR** (400 MHz, CDCl<sub>3</sub>): δ 7.38 – 7.30 (m, 2H), 7.30 – 7.22 (m, 2H), 7.22 – 7.13 (m, 1H), 6.02 (tt, *J* = 3.5, 1.6 Hz, 1H), 3.11 (q, *J* = 3.0 Hz, 2H), 2.65 (t, *J* = 5.9 Hz, 2H), 2.59 – 2.44 (m, 4H), 1.12 (t, *J* = 7.2 Hz, 3H); **<sup>13</sup>C NMR** (100 MHz, CDCl<sub>3</sub>): δ 141.1, 135.1, 128.3, 127.0, 125.0, 122.0, 52.9, 52.2, 50.2, 28.3, 12.5.

#### 1-ethyl-4,5-dimethyl-1,2,3,6-THP (17b)

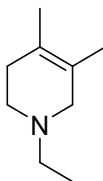

Following General Method 4 with 1-ethyl-3,4-dimethylpyridinium iodide (**17a**) (0.80 g, 3.04 mmol) and subjecting the crude product to flash column chromatography on silica (gradient elution from 99:1 to 95:5 DCM:methanol) afforded the title compound as a yellow oil (0.28 g, 1.98 mmol, 65%).

**17b** (HCl salt):  $^1\text{H NMR}$  (400 MHz,  $\text{CDCl}_3$ ):  $\delta$  12.37 (s, 1H), 3.73 (d,  $J = 16.0$  Hz, 1H), 3.42 (dt,  $J = 11.1, 5.1$  Hz, 1H), 3.11 (ddq,  $J = 26.5, 13.0, 6.3, 5.8$  Hz, 3H), 2.93 (qd,  $J = 12.4, 10.4, 5.4$  Hz, 1H), 2.81 (d,  $J = 19.0$  Hz, 1H), 2.21 – 2.06 (m, 1H), 1.72 (s, 3H), 1.66 (s, 3H), 1.50 (t,  $J = 7.2$  Hz, 3H);  $^{13}\text{C NMR}$  (100 MHz,  $\text{CDCl}_3$ ):  $\delta$  125.8, 118.2, 52.8, 50.5, 48.0, 27.2, 18.4, 16.2, 9.5.

### 2-ethyl-1,2,3,4,5,6,7,8-octahydroisoquinoline (**18b**)

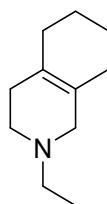

Following General Method 4 with 2-ethyl-5,6,7,8-tetrahydroisoquinolinium iodide (**18a**) (1.00 g, 3.46 mmol) and subjecting the crude product to a short pad of silica (elution 9:1 DCM:methanol) afforded the title compound as a dark yellow oil (0.49 g, 2.97 mmol, 86%).  $^1\text{H NMR}$  (400 MHz,  $\text{CDCl}_3$ ):  $\delta$  2.77 – 2.71 (m, 2H), 2.51 (t,  $J = 5.9$  Hz, 2H), 2.43 (q,  $J = 7.2$  Hz, 2H), 2.07 – 1.98 (m, 2H), 1.89 – 1.79 (m, 4H), 1.63 – 1.52 (m, 4H), 1.11 (t,  $J = 7.2$  Hz, 3H);  $^{13}\text{C NMR}$  (100 MHz,  $\text{CDCl}_3$ ):  $\delta$  126.9, 126.5, 56.8, 52.3, 50.5, 31.0, 29.5, 27.8, 23.0, 22.9, 12.5; **HRMS** calcd. for  $\text{C}_{11}\text{H}_{20}\text{N}^+$  166.1590  $[\text{M}+\text{H}]^+$ , found 166.1590.

### 1-ethyl-4-methyl-5-phenyl-1,2,3,6-THP (**19b**)

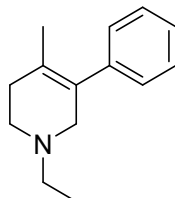

Following General Method 4 with 1-ethyl-4-methyl-3-phenylpyridinium iodide (**19a**) (0.50 g, 1.54 mmol), sodium borohydride (2 equiv.) was added at 0 °C. The reaction mixture was stirred at 0 °C for 30 min, then allowed to warm to room temperature over 1 h. The crude product was subjected to flash column chromatography on silica (gradient elution from 98:2 to 95:5 DCM:methanol) to afford the title

compound as a yellow oil (0.26 g, 1.29 mmol, 84%). **<sup>1</sup>H NMR** (400 MHz, CDCl<sub>3</sub>): δ 7.31 (t, *J* = 7.5 Hz, 2H), 7.26 – 7.18 (m, 1H), 7.17 (d, *J* = 7.5 Hz, 2H), 3.20 – 3.13 (m, 2H), 2.68 (t, *J* = 5.9 Hz, 2H), 2.55 (q, *J* = 7.2 Hz, 2H), 2.32 – 2.26 (m, 2H), 1.58 (s, 3H), 1.16 (t, *J* = 7.2 Hz, 3H); **<sup>13</sup>C NMR** (100 MHz, CDCl<sub>3</sub>): δ 141.6, 130.8, 128.9, 128.2, 128.0, 126.6, 57.8, 52.2, 50.2, 32.3, 19.8, 12.5; **HRMS** calcd. for C<sub>14</sub>H<sub>20</sub>N<sup>+</sup> 202.1590 [M+H]<sup>+</sup>, found 202.1592.

#### 1-allyl-4-methyl-5-phenyl-1,2,3,6-THP (20b)

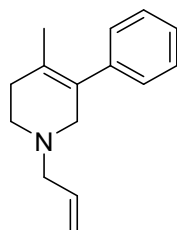

Following General Method 4 with 1-allyl-4-methyl-3-phenylpyridinium bromide (**20a**) (1.34 g, 4.62 mmol), sodium borohydride (2 equiv.) was added at 0 °C. The reaction mixture was stirred at 0 °C for 30 min, then allowed to warm to room temperature over 1 h. The crude product was subjected to flash column chromatography on silica (gradient elution from 99.5:0.5 to 98:2 DCM:methanol) to afford the title compound as a yellow oil (0.45 g, 2.11 mmol, 45%). **<sup>1</sup>H NMR** (400 MHz, CDCl<sub>3</sub>): δ 7.36 – 7.28 (m, 2H), 7.27 – 7.22 (m, 1H), 7.22 – 7.13 (m, 2H), 6.02 – 5.87 (m, 1H), 5.25 – 5.10 (m, 2H), 3.17 – 3.08 (m, 4H), 2.65 (t, *J* = 5.8 Hz, 2H), 2.31 – 2.21 (m, 2H), 1.62 – 1.57 (m, 3H); **<sup>13</sup>C NMR** (100 MHz, CDCl<sub>3</sub>): δ 141.4, 135.5, 130.8, 128.9, 128.2, 128.0, 126.6, 118.0, 61.5, 58.0, 50.1, 32.1, 19.8; **HRMS** calcd. for C<sub>15</sub>H<sub>20</sub>N<sup>+</sup> 214.1590 [M+H]<sup>+</sup>, found 214.1597.

#### 1-allyl-5-methyl-4-phenyl-1,2,3,6-THP (21b)

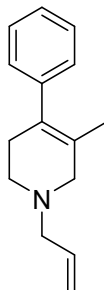

Following General Method 4 with 1-allyl-3-methyl-4-phenylpyridinium bromide (**21a**) (1.70 g, 5.86 mmol), sodium borohydride (2 equiv.) was added at 0 °C. The reaction mixture was stirred at 0 °C for 30 min, then allowed to warm to room temperature over 1 h. The crude product was subjected to flash

column chromatography on silica (gradient elution from 99.5:0.5 to 98:2 DCM:methanol) to afford the title compound as a yellow oil (0.94 g, 4.40 mmol, 75%). **<sup>1</sup>H NMR** (400 MHz, CDCl<sub>3</sub>): δ 7.36 – 7.28 (m, 2H), 7.28 – 7.20 (m, 1H), 7.20 – 7.12 (m, 2H), 6.04 – 5.90 (m, 1H), 5.30 – 5.22 (m, 1H), 5.22 – 5.14 (m, 1H), 3.13 (dt, *J* = 6.7, 1.3 Hz, 2H), 3.02 – 2.96 (m, 2H), 2.66 (t, *J* = 5.8 Hz, 2H), 2.49 – 2.39 (m, 2H), 1.59 – 1.55 (m, 3H); **<sup>13</sup>C NMR** (100 MHz, CDCl<sub>3</sub>): δ 142.7, 135.5, 130.8, 128.6, 128.2, 127.5, 126.4, 118.1, 61.6, 58.1, 50.5, 32.3, 18.1; **HRMS** calcd. for C<sub>15</sub>H<sub>20</sub>N<sup>+</sup> 214.1590 [M+H]<sup>+</sup>, found 214.1585.

### 13.2. General Method 5: Hydrogenation of THP for the preparation of racemic standards

To a schlenk flask charged with 10% Pd/C (0.1 equiv.), THP (1 equiv.) in methanol (3.60 mL/mmol of THP) was added under nitrogen. The sealed flask was purged with two cycles of hydrogen (balloons) and the mixture was vigorously stirred at room temperature under hydrogen (balloon) overnight. Excess hydrogen was evacuated and replaced with nitrogen before the reaction mixture was filtered through celite. Methanol was removed *in vacuo* to afford the corresponding racemic standard.

#### 3-(3-methoxyphenyl)-1-propylpiperidine

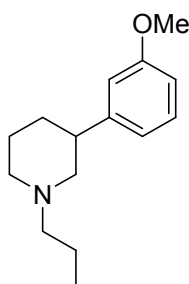

Following General Method 5 with 5-(3-methoxyphenyl)-1-propyl-1,2,3,6-THP (**1b**) (1.81 g, 7.81 mmol) afforded the title compound as a yellow oil (0.90 g, 3.86 mmol, 49%). **<sup>1</sup>H NMR** (500 MHz, CDCl<sub>3</sub>): δ 7.21 (t, *J* = 7.8 Hz, 1H), 6.83 (d, *J* = 7.8 Hz, 1H), 6.81 – 6.77 (m, 1H), 6.75 (dd, *J* = 8.2, 2.7 Hz, 1H), 3.79 (s, 3H), 3.06 – 2.94 (m, 2H), 2.81 (tt, *J* = 11.6, 3.7 Hz, 1H), 2.31 (td, *J* = 7.0, 2.2 Hz, 2H), 1.99 – 1.89 (m, 3H), 1.83 – 1.66 (m, 2H), 1.60 – 1.38 (m, 3H), 0.89 (t, *J* = 7.4 Hz, 3H); **<sup>13</sup>C NMR** (126 MHz, CDCl<sub>3</sub>): δ 159.7, 146.6, 129.4, 119.7, 113.4, 111.4, 61.4, 61.3, 55.2, 54.0, 43.1, 31.7, 25.8, 20.1, 12.1; **HRMS** calcd. for C<sub>15</sub>H<sub>24</sub>NO<sup>+</sup> 234.1852 [M+H]<sup>+</sup>, found 234.1842.

#### 3-(1-propylpiperidin-3-yl)phenol

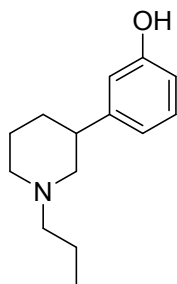

Following General Method 5 with 3-(1-propyl-1,2,5,6-tetrahydropyridin-3-yl)phenol (0.50 g, 2.30 mmol) afforded the title compound as a yellow oil (0.38 g, 1.73 mmol, 75%). **<sup>1</sup>H NMR** (400 MHz, CDCl<sub>3</sub>): δ 7.14 (t, *J* = 8.1 Hz, 1H), 6.70 – 6.64 (m, 3H), 3.14 (d, *J* = 10.0 Hz, 1H), 3.02 (d, *J* = 11.5 Hz, 1H), 2.83 (tt, *J* = 11.9, 3.5 Hz, 1H), 2.35 (td, *J* = 11.6, 5.3 Hz, 1H), 2.22 (td, *J* = 11.6, 5.3 Hz, 1H), 2.03 – 1.84 (m, 3H), 1.82 – 1.62 (m, 2H), 1.59 – 1.40 (m, 3H), 0.77 (t, *J* = 7.3 Hz, 3H); **<sup>13</sup>C NMR** (100 MHz, CDCl<sub>3</sub>): δ 157.4, 145.6, 130.2, 116.9, 115.2, 114.6, 61.6, 61.5, 54.2, 43.3, 30.2, 25.5, 19.1, 12.2; **HRMS** calcd. for C<sub>14</sub>H<sub>22</sub>NO<sup>+</sup> 220.1696 [M+H]<sup>+</sup>, found 220.1697.

### 3-(3-(methylsulfonyl)phenyl)-1-propylpiperidine

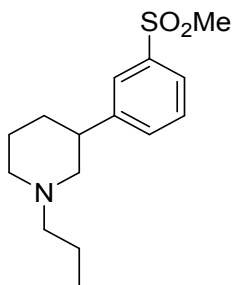

Following General Method 5 with 5-(3-(methylsulfonyl)phenyl)-1-propyl-1,2,3,6-THP (**2b**) (1.00 g, 3.58 mmol) afforded the title compound as an orange oil (0.89 g, 3.15 mmol, 88%). **<sup>1</sup>H NMR** (400 MHz, CDCl<sub>3</sub>): δ 7.82 – 7.73 (m, 2H), 7.54 – 7.44 (m, 2H), 3.04 (s, 3H), 3.02 – 2.84 (m, 3H), 2.36 – 2.26 (m, 2H), 2.05 – 1.88 (m, 3H), 1.83 – 1.75 (m, 1H), 1.75 – 1.63 (m, 1H), 1.57 – 1.37 (m, 3H), 0.88 (t, *J* = 7.4 Hz, 3H); **<sup>13</sup>C NMR** (100 MHz, CDCl<sub>3</sub>): δ 146.9, 140.7, 133.0, 129.5, 125.9, 125.4, 61.2, 60.9, 53.8, 44.6, 42.9, 31.7, 25.6, 20.1, 12.1; **HRMS** calcd. for C<sub>15</sub>H<sub>23</sub>NO<sub>2</sub>S<sup>+</sup> 281.1449 [M+H]<sup>+</sup>, found 281.1458.

### 3-phenyl-1-propylpiperidine



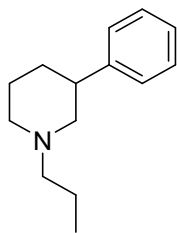

Following General Method 5 with 1-allyl-5-(4-bromophenyl)-1,2,3,6-THP (**3b**) (200 mg, 0.72 mmol) afforded the title compound as a colourless oil (52.6 mg, 0.26 mmol, 36%). **<sup>1</sup>H NMR** (400 MHz, CDCl<sub>3</sub>): δ 7.34 – 7.16 (m, 5H), 3.62 – 3.45 (m, 3H), 3.02 – 2.83 (m, 2H), 2.81 – 2.67 (m, 2H), 2.41 (qt, *J* = 13.3, 3.8 Hz, 1H), 2.13 – 2.03 (m, 1H), 2.03 – 1.83 (m, 3H), 1.71 (qd, *J* = 13.3, 3.8 Hz, 1H), 0.97 (t, *J* = 7.4 Hz, 3H); **<sup>13</sup>C NMR** (100 MHz, CDCl<sub>3</sub>): δ 140.6, 128.9, 127.5, 127.1, 59.3, 58.1, 52.7, 39.8, 29.5, 22.9, 17.5, 11.3; **HRMS** calcd. for C<sub>14</sub>H<sub>22</sub>N<sup>+</sup> 204.1747 [M+H]<sup>+</sup>, found 204.1756.

#### 4-(1-propylpiperidin-3-yl)aniline

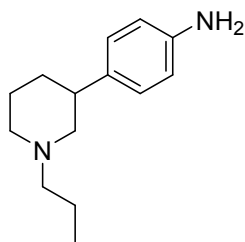

Following General Method 5 with 4-(1-allyl-1,2,5,6-tetrahydropyridin-3-yl)aniline (**4b**) (0.50 g, 2.33 mmol) afforded the title compound as a colourless oil (0.36 g, 1.65 mmol, 71%). **<sup>1</sup>H NMR** (400 MHz, CDCl<sub>3</sub>): δ 7.02 (d, *J* = 8.4 Hz, 2H), 6.63 (d, *J* = 8.4 Hz, 2H), 3.57 (s, 1H), 3.02 – 2.92 (m, 2H), 2.71 (tt, *J* = 11.7, 3.6 Hz, 1H), 2.34 – 2.25 (m, 2H), 1.94 – 1.83 (m, 3H), 1.81 – 1.62 (m, 2H), 1.58 – 1.46 (m, 2H), 1.38 (qd, *J* = 12.3, 4.4 Hz, 1H), 0.88 (t, *J* = 7.4 Hz, 3H); **<sup>13</sup>C NMR** (100 MHz, CDCl<sub>3</sub>): δ 144.7, 135.2, 128.1, 115.3, 61.9, 61.4, 54.1, 42.2, 31.9, 26.0, 20.2, 12.2; **HRMS** calcd. for C<sub>14</sub>H<sub>23</sub>N<sub>2</sub><sup>+</sup> 219.1856 [M+H]<sup>+</sup>, found 219.1855.

#### 1-ethyl-3-phenylpiperidine

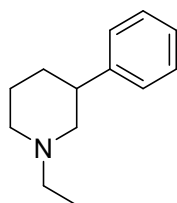

Following General Method 5 with 1-ethyl-5-phenyl-1,2,3,6-THP (**5b**) (1.00 g, 5.34 mmol) afforded the title compound as a colourless oil (0.75 g, 3.95 mmol, 74%).

Racemic HCl salt:  $^1\text{H NMR}$  (400 MHz,  $\text{CDCl}_3$ ):  $\delta$  12.33 (s, 1H), 7.31 – 7.20 (m, 3H), 7.19 – 7.14 (m, 2H), 3.63 – 3.44 (m, 3H), 3.01 (ddq,  $J = 18.4, 13.1, 6.5, 6.0$  Hz, 2H), 2.65 – 2.38 (m, 3H), 2.01 (dd,  $J = 47.1, 14.0$  Hz, 2H), 1.84 (s, 1H), 1.60 (qd,  $J = 12.8, 3.6$  Hz, 1H), 1.43 (t,  $J = 7.2$  Hz, 3H);  $^{13}\text{C NMR}$  (100 MHz,  $\text{CDCl}_3$ ):  $\delta$  140.5, 129.1, 127.8, 127.2, 57.7, 52.9, 52.4, 39.6, 29.7, 22.8, 9.3.

### (S)-1-ethyl-3-phenylpiperidine

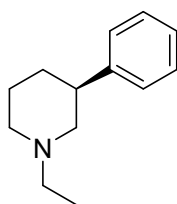

To a solution of the commercially available (S)-3-phenylpiperidine (50 mg, 0.31 mmol) and  $\text{K}_2\text{CO}_3$  (85 mg, 0.62 mmol) in MeCN (1 ml) was added iodoethane (27  $\mu\text{l}$ , 0.34 mmol) at room temperature. The solution was allowed to stir at room temperature overnight. The reaction was stopped by the addition of  $\text{H}_2\text{O}$  and washed with DCM. The organic phase was dried over  $\text{MgSO}_4$ , filtered and concentrated under vacuo to yield the pure compound **5c** as an off white oil in 51% yield. Spectroscopic data is in accord with previous.

### 1-ethyl-3-(4-fluorophenyl)piperidine

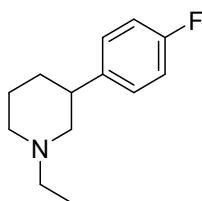

Following General Method 5 with 1-ethyl-5-(4-fluorophenyl)-1,2,3,6-THP (**6b**) (0.50 g, 2.44 mmol) afforded the title compound as a pale-yellow oil (0.10 g, 0.48 mmol, 20%).  $^1\text{H NMR}$  (400 MHz,  $\text{CDCl}_3$ ):  $\delta$  7.15 (dd,  $J = 8.5, 5.5$  Hz, 2H), 6.94 (t,  $J = 8.5$  Hz, 2H), 3.01 – 2.93 (m, 2H), 2.85 – 2.73 (m, 1H), 2.40 (q,  $J = 7.2$  Hz, 2H), 1.92 – 1.82 (m, 3H), 1.81 – 1.62 (m, 2H), 1.38 (qd,  $J = 12.4, 4.4$  Hz, 1H), 1.07 (t,  $J = 7.2$  Hz, 3H);  $^{13}\text{C NMR}$  (100 MHz,  $\text{CDCl}_3$ ):  $\delta$  162.7, 160.2, 140.6, 128.6, 128.5, 115.2,

115.0, 61.2, 53.4, 52.8, 42.3, 31.9, 25.8, 12.1; **HRMS** calcd. for  $C_{13}H_{19}FN^+$  208.1496  $[M+H]^+$ , found 208.1488.

### 1-ethyl-3-(4-methoxyphenyl)piperidine

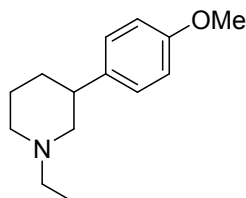

Following General Method 5 with 1-ethyl-5-(4-methoxyphenyl)-1,2,3,6-THP (**7b**) (0.21 g, 0.97 mmol) afforded the title compound as a yellow oil (0.19 g, 0.87 mmol, 89%). **<sup>1</sup>H NMR** (400 MHz,  $CDCl_3$ ):  $\delta$  7.19 – 7.12 (m, 2H), 6.84 (d,  $J = 8.1$  Hz, 2H), 3.79 (s, 3H), 3.01 (d,  $J = 11.5$  Hz, 2H), 2.79 (t,  $J = 11.8$  Hz, 1H), 2.43 (q,  $J = 7.2$  Hz, 2H), 1.89 (t,  $J = 11.2$  Hz, 3H), 1.81 – 1.67 (m, 2H), 1.42 (qd,  $J = 12.3, 4.3$  Hz, 1H), 1.09 (t,  $J = 7.9$  Hz, 3H); **<sup>13</sup>C NMR** (100 MHz,  $CDCl_3$ ):  $\delta$  158.2, 137.2, 128.2, 113.9, 61.4, 55.4, 53.6, 52.9, 42.3, 32.0, 26.0, 12.2; **HRMS** calcd. for  $C_{14}H_{22}NO^+$  220.1696  $[M+H]^+$ , found 220.1694.

### 1-ethyl-3-(furan-2-yl)piperidine

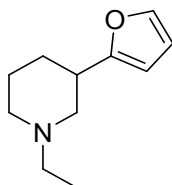

Following General Method 5 with 1-ethyl-5-(furan-2-yl)-1,2,3,6-THP (**8b**) (0.29 g, 1.66 mmol) afforded the title compound as a yellow oil (0.22 g, 1.23 mmol, 74%). **<sup>1</sup>H NMR** (500 MHz,  $CDCl_3$ ):  $\delta$  7.33 – 7.29 (m, 1H), 6.31 – 6.27 (m, 1H), 6.06 (d,  $J = 3.2$  Hz, 1H), 3.46 – 3.39 (m, 1H), 3.38 – 3.22 (m, 2H), 2.82 – 2.73 (m, 2H), 2.35 – 2.24 (m, 2H), 2.14 – 2.03 (m, 2H), 1.91 – 1.83 (m, 1H), 1.52 (qd,  $J = 13.5, 13.0, 3.9$  Hz, 1H), 1.30 (t,  $J = 7.3$  Hz, 3H); **<sup>13</sup>C NMR** (126 MHz,  $CDCl_3$ ):  $\delta$  155.9, 141.5, 110.2, 104.9, 56.6, 52.9, 52.7, 34.8, 28.5, 23.7, 10.6; **HRMS** calcd. for  $C_{11}H_{18}NO^+$  180.1383  $[M+H]^+$ , found 180.1375.

### 1-ethyl-3-(thiophen-2-yl)piperidine

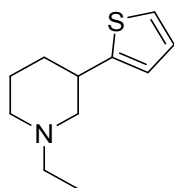

Following General Method 5 with 1-ethyl-5-(thiophen-2-yl)-1,2,3,6-THP (**9b**) (0.61 g, 3.15 mmol) afforded the title compound as a brown oil (0.18 g, 0.92 mmol, 29%). **<sup>1</sup>H NMR** (500 MHz, CDCl<sub>3</sub>): δ 7.13 (d, *J* = 5.1 Hz, 1H), 6.93 (dd, *J* = 5.1, 3.5 Hz, 1H), 6.84 (d, *J* = 3.5 Hz, 1H), 3.29 – 3.16 (m, 2H), 3.08 – 3.00 (m, 1H), 2.53 (q, *J* = 7.2 Hz, 2H), 2.14 – 1.97 (m, 3H), 1.86 – 1.77 (m, 2H), 1.51 – 1.40 (m, 1H), 1.15 (t, *J* = 7.2 Hz, 3H); **<sup>13</sup>C NMR** (126 MHz, CDCl<sub>3</sub>): δ 148.0, 126.7, 123.1, 123.0, 61.0, 53.2, 52.7, 37.8, 33.0, 25.2, 11.7; **HRMS** calcd. for C<sub>11</sub>H<sub>18</sub>NS<sup>+</sup> 196.1154 [M+H]<sup>+</sup>, found 196.1148.

### 1-ethyl-3-(naphthalen-2-yl)piperidine

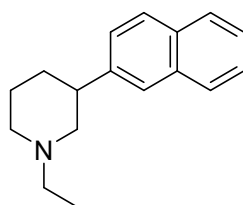

Following General Method 5 with 1-ethyl-5-(naphthalen-2-yl)-1,2,3,6-THP (**10b**) (0.33 g, 1.39 mmol) afforded the title compound as a yellow oil (0.27 g, 1.12 mmol, 81%). **<sup>1</sup>H NMR** (400 MHz, CDCl<sub>3</sub>): δ 7.84 – 7.75 (m, 3H), 7.67 (s, 1H), 7.49 – 7.36 (m, 3H), 3.18 – 3.10 (m, 1H), 3.10 – 2.95 (m, 2H), 2.48 (q, *J* = 7.2 Hz, 2H), 2.10 – 1.92 (m, 3H), 1.83 – 1.73 (m, 2H), 1.58 (qd, *J* = 12.3, 4.7 Hz, 1H), 1.12 (t, *J* = 7.2 Hz, 3H); **<sup>13</sup>C NMR** (100 MHz, CDCl<sub>3</sub>): δ 142.4, 133.7, 132.5, 128.0, 127.8, 127.7, 126.4, 126.1, 125.5, 125.4, 61.0, 53.7, 52.9, 43.2, 31.8, 26.0, 12.2; **HRMS** calcd. for C<sub>17</sub>H<sub>22</sub>N<sup>+</sup> 240.1747 [M+H]<sup>+</sup>, found 240.1745.

### 1-methyl-3-phenylpiperidine

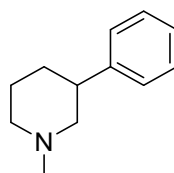

Following General Method 5 with 1-methyl-5-phenyl-1,2,3,6-THP (**11b**) (0.29 g, 1.68 mmol) afforded the title compound as a colourless oil (0.21 g, 1.20 mmol, 71%). **<sup>1</sup>H NMR** (400 MHz, CDCl<sub>3</sub>): δ 7.34 –

7.16 (m, 5H), 3.00 – 2.88 (m, 2H), 2.88 – 2.77 (m, 1H), 2.30 (s, 3H), 2.10 – 1.86 (m, 3H), 1.85 – 1.66 (m, 2H), 1.43 (qd,  $J = 12.4, 4.5$  Hz, 1H);  $^{13}\text{C}$  NMR (100 MHz,  $\text{CDCl}_3$ ):  $\delta$  144.8, 128.5, 127.3, 126.5, 63.4, 56.0, 46.7, 43.2, 31.1, 26.0; HRMS calcd. for  $\text{C}_{12}\text{H}_{18}\text{N}^+$  176.1434  $[\text{M}+\text{H}]^+$ , found 176.1433.

### (S)-1-methyl-3-phenylpiperidine

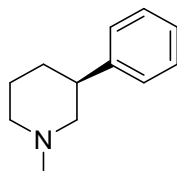

To a solution of the commercially available (S)-3-phenylpiperidine (50 mg, 0.31 mmol) and  $\text{K}_2\text{CO}_3$  (85 mg, 0.62 mmol) in MeCN (1 ml) was added iodomethane (21  $\mu\text{l}$ , 0.34 mmol) at room temperature. The solution was allowed to stir at room temperature overnight. The reaction was stopped by the addition of  $\text{H}_2\text{O}$  and washed with DCM. The organic phase was dried over  $\text{MgSO}_4$ , filtered and concentrated under vacuo to yield the pure compound **11c** as a white solid in 59% yield. Spectroscopic data is in accord with previous.

### 1-ethyl-3-methylpiperidine

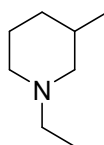

Following General Method 5 with 1-ethyl-5-methyl-1,2,3,6-THP (**13b**) (1.00 g, 7.99 mmol) afforded the title compound the title compound as a colourless oil (0.42 g, 3.27 mmol, 41%).

Racemic HCl salt:  $^1\text{H}$  NMR (400 MHz,  $\text{CDCl}_3$ ):  $\delta$  11.69 (s, 1H), 3.53 (d,  $J = 12.0$  Hz, 1H), 3.45 – 3.34 (m, 1H), 3.11 – 2.97 (m, 2H), 2.55 – 2.09 (m, 4H), 1.97 – 1.77 (m, 2H), 1.46 (t,  $J = 7.3$  Hz, 3H), 1.14 – 1.00 (m, 1H), 0.95 (d,  $J = 6.6$  Hz, 3H);  $^{13}\text{C}$  NMR (100 MHz,  $\text{CDCl}_3$ ):  $\delta$  58.6, 52.7, 52.3, 31.0, 28.8, 22.7, 19.1, 9.2.

### 1-benzyl-3-methylpiperidine

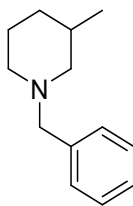

Following General Method 5 with 1-benzyl-5-methyl-1,2,3,6-THP (**14b**) (2.00 g, 10.68 mmol) afforded the title compound as a colourless oil (1.86 g, 9.82 mmol, 92%). **<sup>1</sup>H NMR** (400 MHz, CDCl<sub>3</sub>): δ 7.30 – 7.13 (m, 5H), 3.42 (s, 2H), 2.90 – 2.68 (m, 2H), 1.86 – 1.75 (m, 1H), 1.70 – 1.40 (m, 6H), 0.78 (d, *J* = 6.3 Hz, 3H); **<sup>13</sup>C NMR** (100 MHz, CDCl<sub>3</sub>): δ 138.8, 129.2, 128.2, 126.9, 63.7, 62.1, 54.1, 33.2, 31.2, 25.7, 19.9.

#### 1-ethyl-4-methylpiperidine

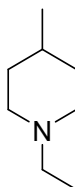

Following General Method 5 with 1-ethyl-4-methyl-1,2,3,6-THP (**15b**) (1.00 g, 7.99 mmol) afforded the title compound the title compound as a colourless oil (0.30 g, 2.40 mmol, 30%).

Racemic HCl salt: **<sup>1</sup>H NMR** (400 MHz, CDCl<sub>3</sub>): δ 10.95 (s, 1H), 3.43 (d, *J* = 11.5 Hz, 2H), 3.09 – 2.96 (m, 2H), 2.79 – 2.65 (m, 2H), 1.87 – 1.75 (m, 3H), 1.67 – 1.56 (m, 1H), 1.36 (t, *J* = 7.0 Hz, 3H), 0.99 (dd, *J* = 11.9, 6.5 Hz, 1H), 0.91 (d, *J* = 6.3 Hz, 3H); **<sup>13</sup>C NMR** (100 MHz, CDCl<sub>3</sub>): δ 52.4, 52.3, 30.8, 29.1, 20.9, 9.3; **HRMS** calcd. for C<sub>8</sub>H<sub>18</sub>ClN<sup>+</sup> 128.1434 [M-Cl]<sup>+</sup>, found 128.1429.

#### 1-ethyl-3,4-dimethylpiperidine

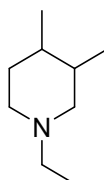

Following General Method 5 with 1-ethyl-4,5-dimethyl-1,2,3,6-THP (**17b**) (0.27 mg, 1.90 mmol) afforded the title compound as a colourless oil (0.16 g, 1.13 mmol, 59%). **<sup>1</sup>H NMR** (400 MHz, CDCl<sub>3</sub>): δ 3.55 – 2.95 (m, 6H), 1.44 (t, *J* = 7.3 Hz, 3H), 1.34 – 1.07 (m, 4H), 1.04 – 0.88 (m, 6H); **<sup>13</sup>C NMR**

(100 MHz, CDCl<sub>3</sub>):  $\delta$  52.4, 46.4, 36.2, 31.2, 31.0, 29.8, 18.5, 16.5, 9.3; **HRMS** calcd. for C<sub>9</sub>H<sub>20</sub>N<sup>+</sup> 142.1590 [M+H]<sup>+</sup>, found 142.1585.

### 2-ethyldecahydroisoquinoline

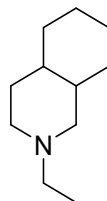

Following General Method 5 with 2-ethyl-1,2,3,4,5,6,7,8-octahydroisoquinoline (**18b**) (230 mg, 1.39 mmol) afforded the title compound as a colourless oil (140 mg, 0.83 mmol, 60%). **<sup>1</sup>H NMR** (400 MHz, CDCl<sub>3</sub>):  $\delta$  3.06 – 2.55 (m, 6H), 1.91 – 1.12 (m, 15H); **<sup>13</sup>C NMR** (100 MHz, CDCl<sub>3</sub>):  $\delta$  58.1, 53.1, 52.7, 40.8, 39.2, 32.0, 30.2, 29.8, 26.1, 25.4, 10.1; **HRMS** calcd. for C<sub>11</sub>H<sub>22</sub>N<sup>+</sup> 168.1747 [M+H]<sup>+</sup>, found 168.1746.

### 1-ethyl-4-methyl-3-phenylpiperidine

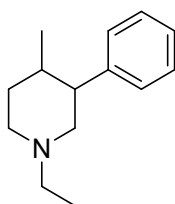

Following General Method 5 with 1-ethyl-4-methyl-5-phenyl-1,2,3,6-THP (**19b**) (0.31 mg, 1.54 mmol) afforded the title compound as a pale-yellow oil (0.22 g, 1.08 mmol, 70%). **<sup>1</sup>H NMR** (400 MHz, CDCl<sub>3</sub>):  $\delta$  7.32 – 7.25 (m, 4H), 7.24 – 7.15 (m, 1H), 3.11 – 3.02 (m, 1H), 2.78 – 2.70 (m, 1H), 2.66 – 2.53 (m, 2H), 2.47 (q,  $J = 7.2$  Hz, 2H), 2.37 (s, 1H), 2.13 – 2.02 (m, 1H), 1.90 (s, 1H), 1.65 – 1.54 (m, 1H), 1.11 (t,  $J = 7.2$  Hz, 3H), 0.71 (d,  $J = 7.2$  Hz, 3H); **<sup>13</sup>C NMR** (100 MHz, CDCl<sub>3</sub>):  $\delta$  142.6, 128.2, 128.0, 126.3, 58.3, 52.9, 44.2, 32.3, 31.4, 29.8, 18.5, 11.6; **HRMS** calcd. for C<sub>14</sub>H<sub>22</sub>N<sup>+</sup> 204.1747 [M+H]<sup>+</sup>, found 204.1746.

### 4-methyl-3-phenyl-1-propylpiperidine

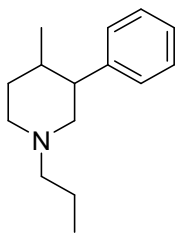

Following General Method 5 4-methyl-5-phenyl-1-propyl-1,2,3,6-THP (**20b**) (0.50 mg, 2.32 mmol) afforded the title compound as a pale-yellow oil (0.42 g, 2.32 mmol, 83%). **<sup>1</sup>H NMR** (400 MHz, CDCl<sub>3</sub>): δ 7.39 – 7.13 (m, 5H), 3.07 – 2.97 (m, 1H), 2.70 – 2.60 (m, 1H), 2.54 – 2.38 (m, 2H), 2.39 – 2.25 (m, 2H), 2.08 – 2.00 (m, 1H), 1.78 (d, *J* = 43.1 Hz, 2H), 1.63 – 1.47 (m, 3H), 0.91 (t, *J* = 7.4 Hz, 3H), 0.70 (d, *J* = 7.1 Hz, 3H); **<sup>13</sup>C NMR** (100 MHz, CDCl<sub>3</sub>): δ 143.8, 128.7, 127.9, 126.0, 61.4, 54.4, 51.0, 45.3, 33.1, 31.9, 20.4, 19.9, 12.2.



## 14. Compound <sup>1</sup>H NMR and <sup>13</sup>C NMR Spectra

<sup>1</sup>H & <sup>13</sup>C NMR spectra for 1-ethyl-3-methyl-1,2,5,6-THP-2-carbonitrile (25)

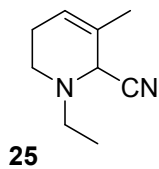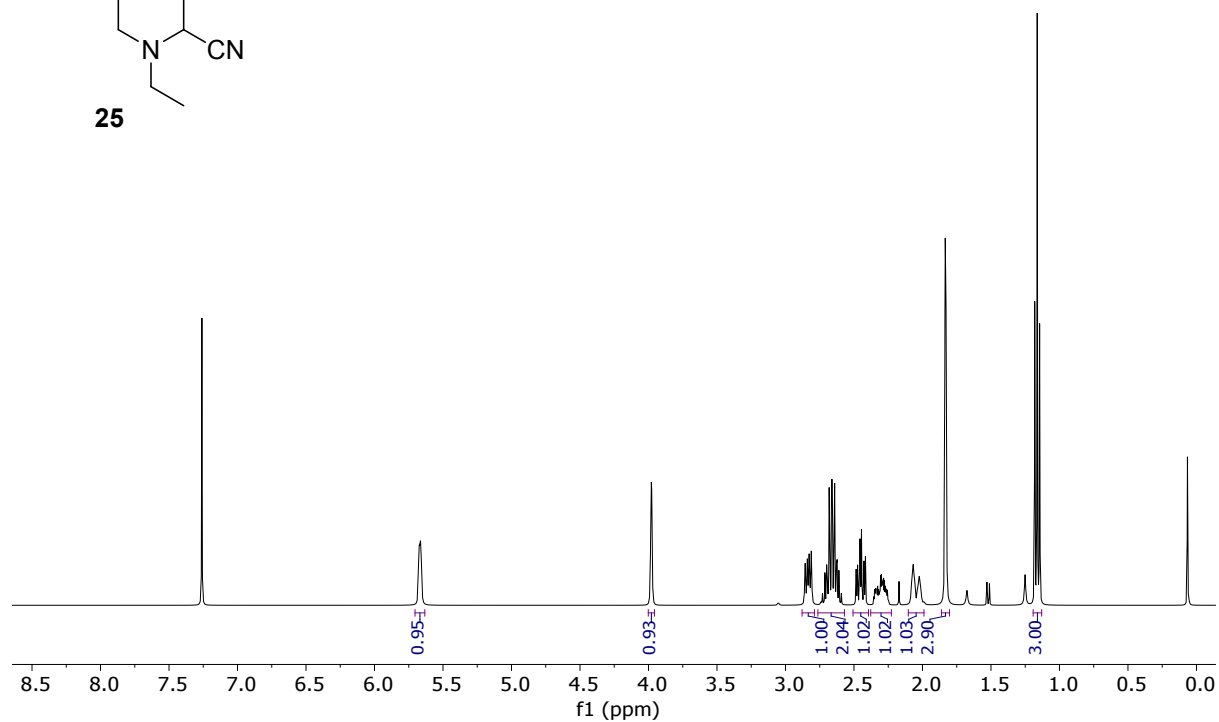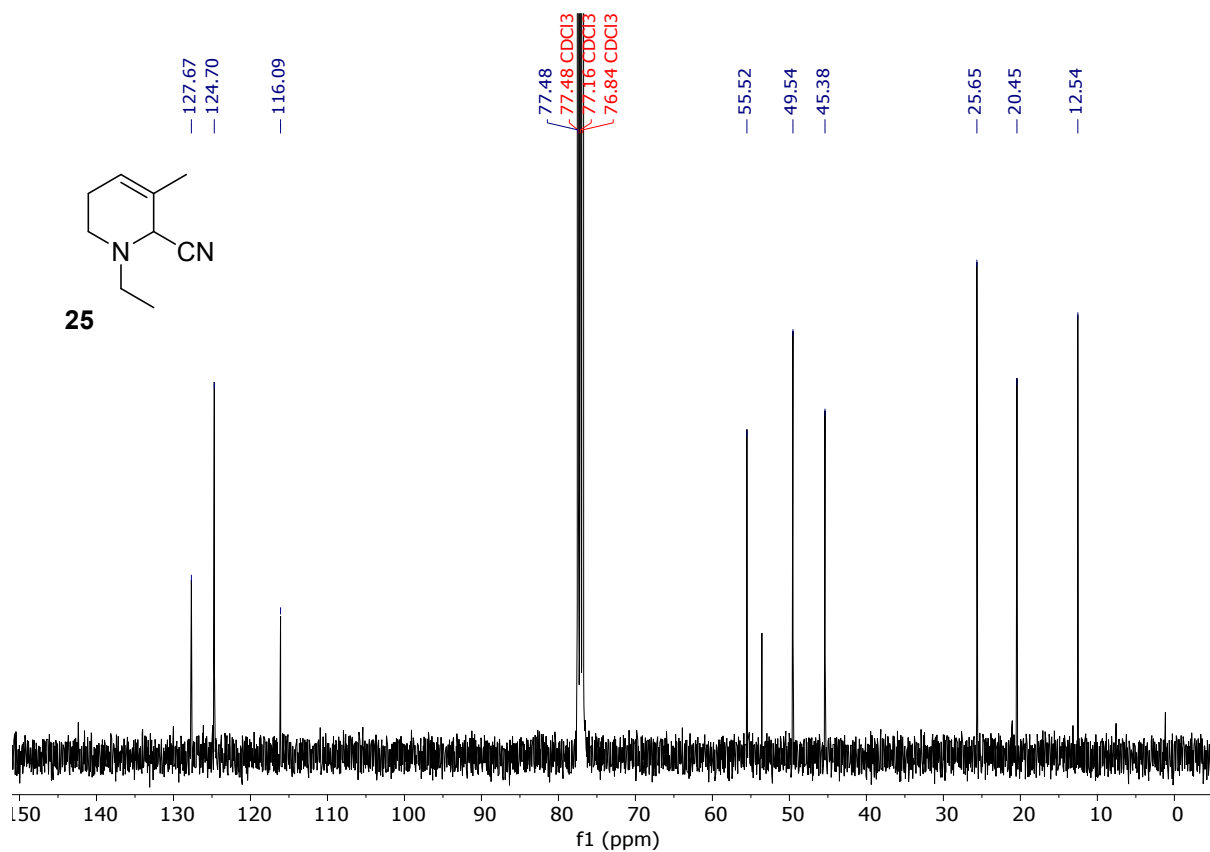

**<sup>1</sup>H & <sup>13</sup>C NMR spectra for (R)-3-(3-methoxyphenyl)-1-propylpiperidine (1c)**

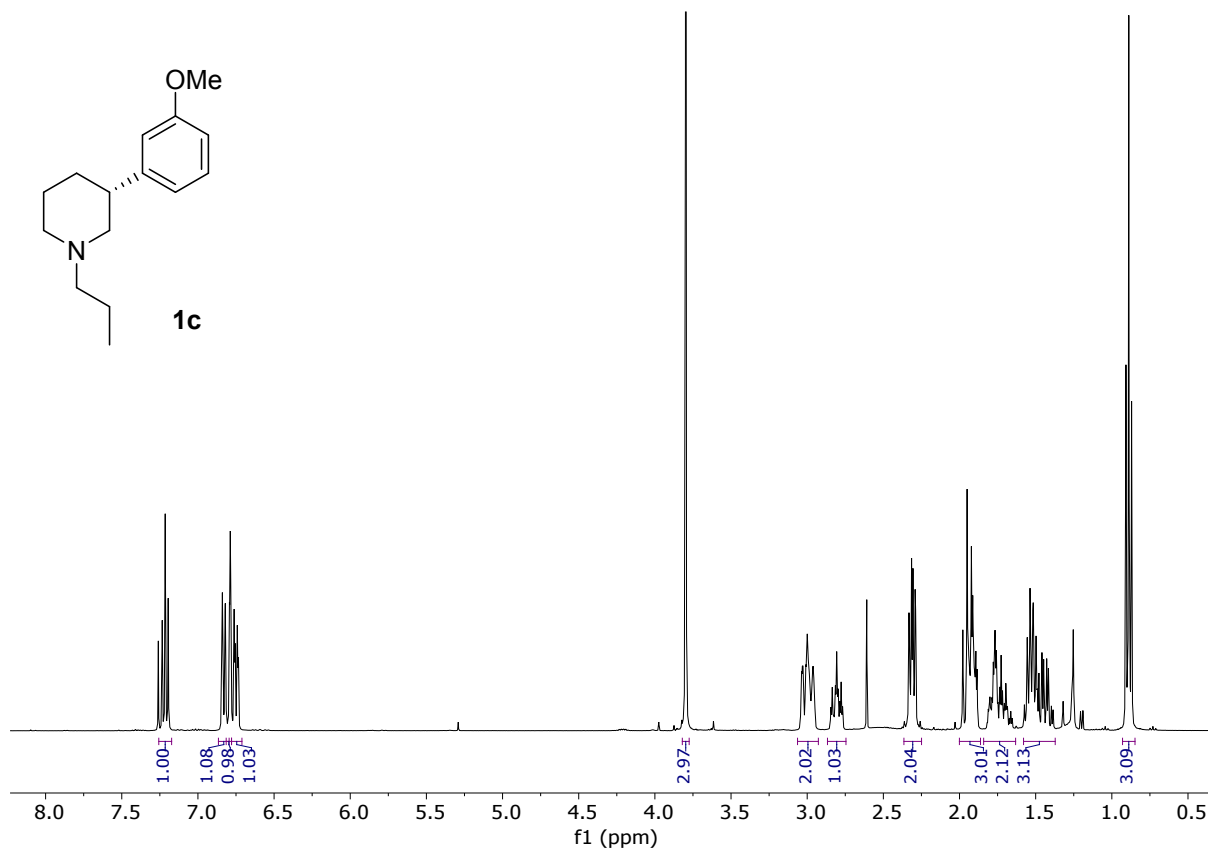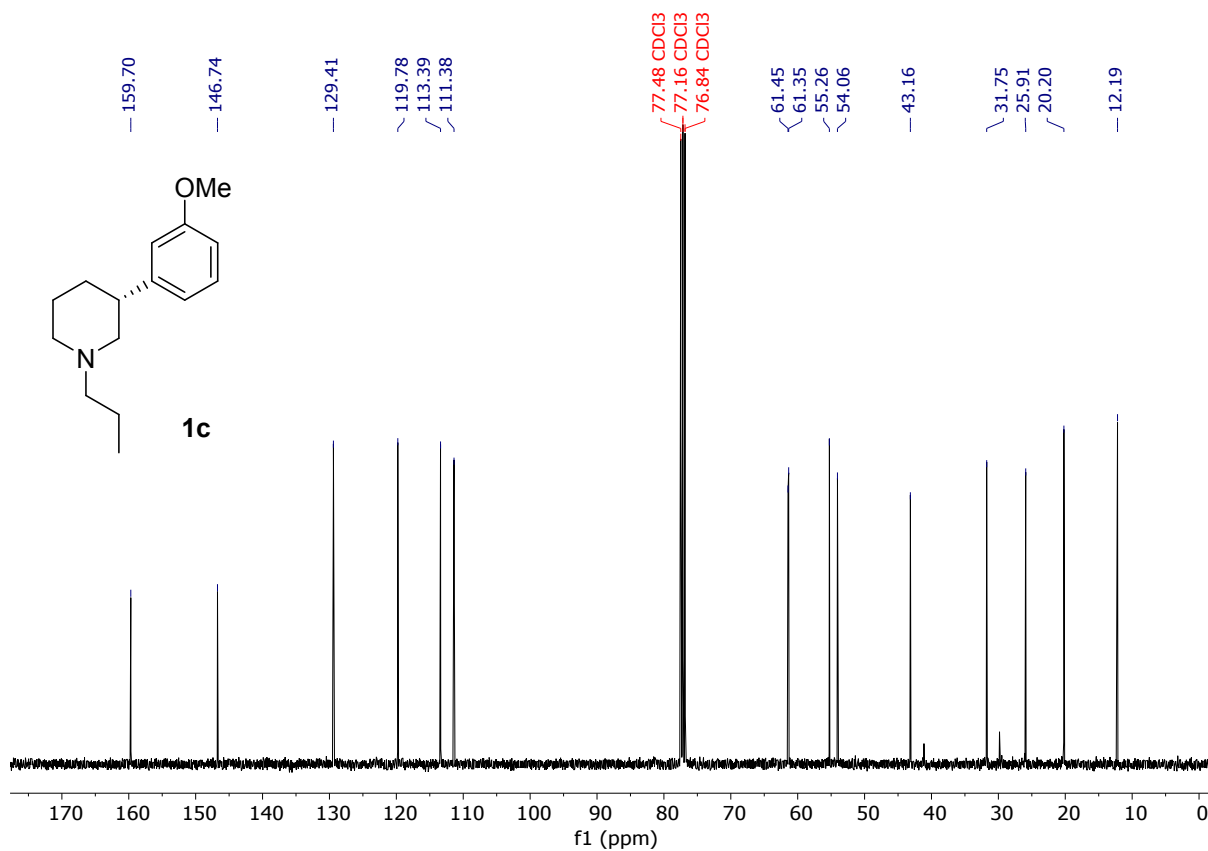

**<sup>1</sup>H & <sup>13</sup>C NMR spectra for (R)-3-(1-propylpiperidin-3-yl)phenol (22)**

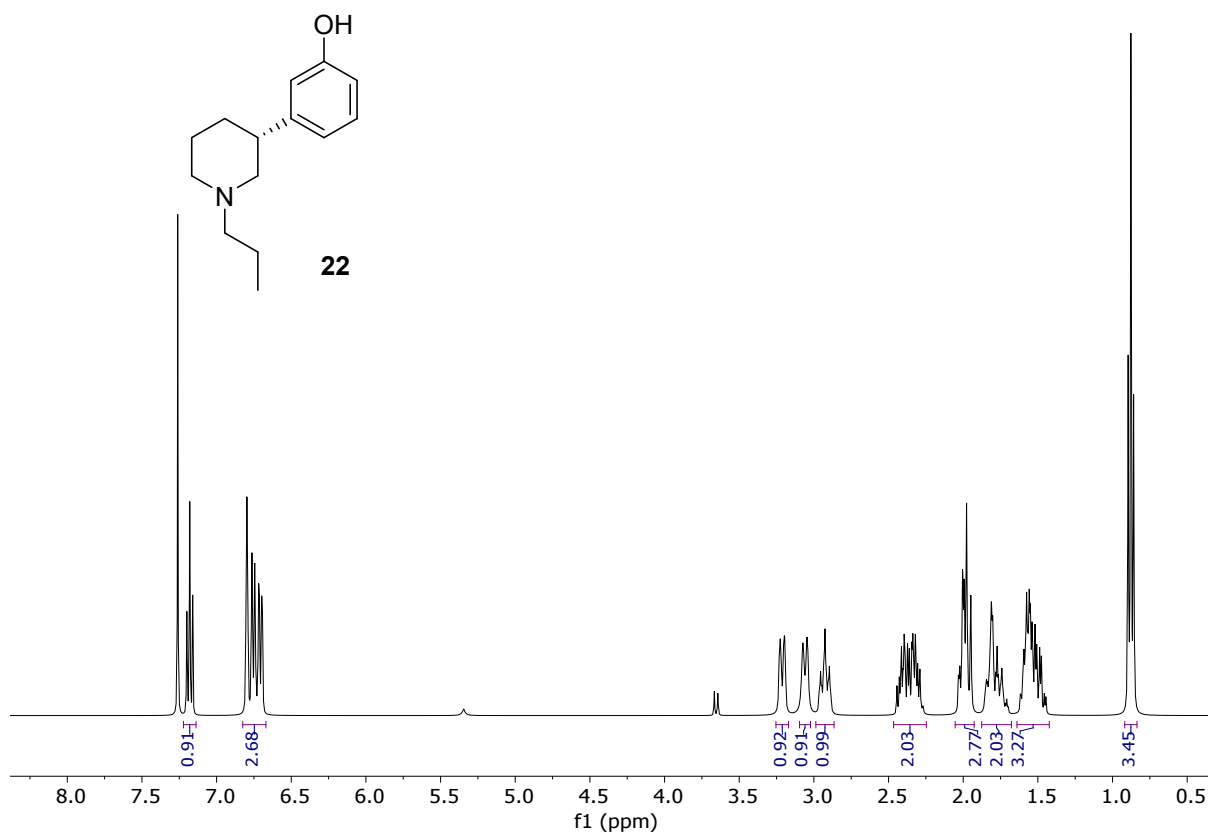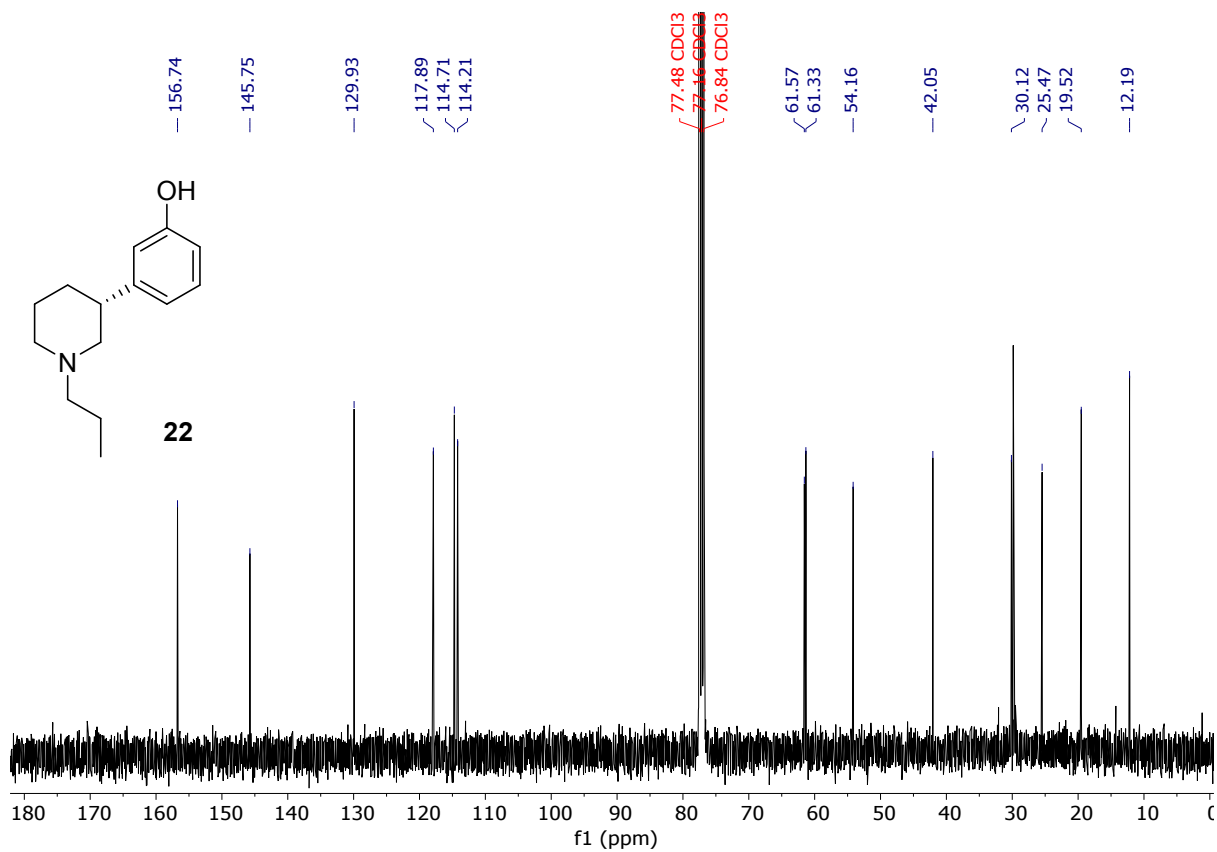

**<sup>1</sup>H & <sup>13</sup>C NMR spectra for (R)-3-(3-(methylsulfonyl)phenyl)-1-propylpiperidine (2c)**

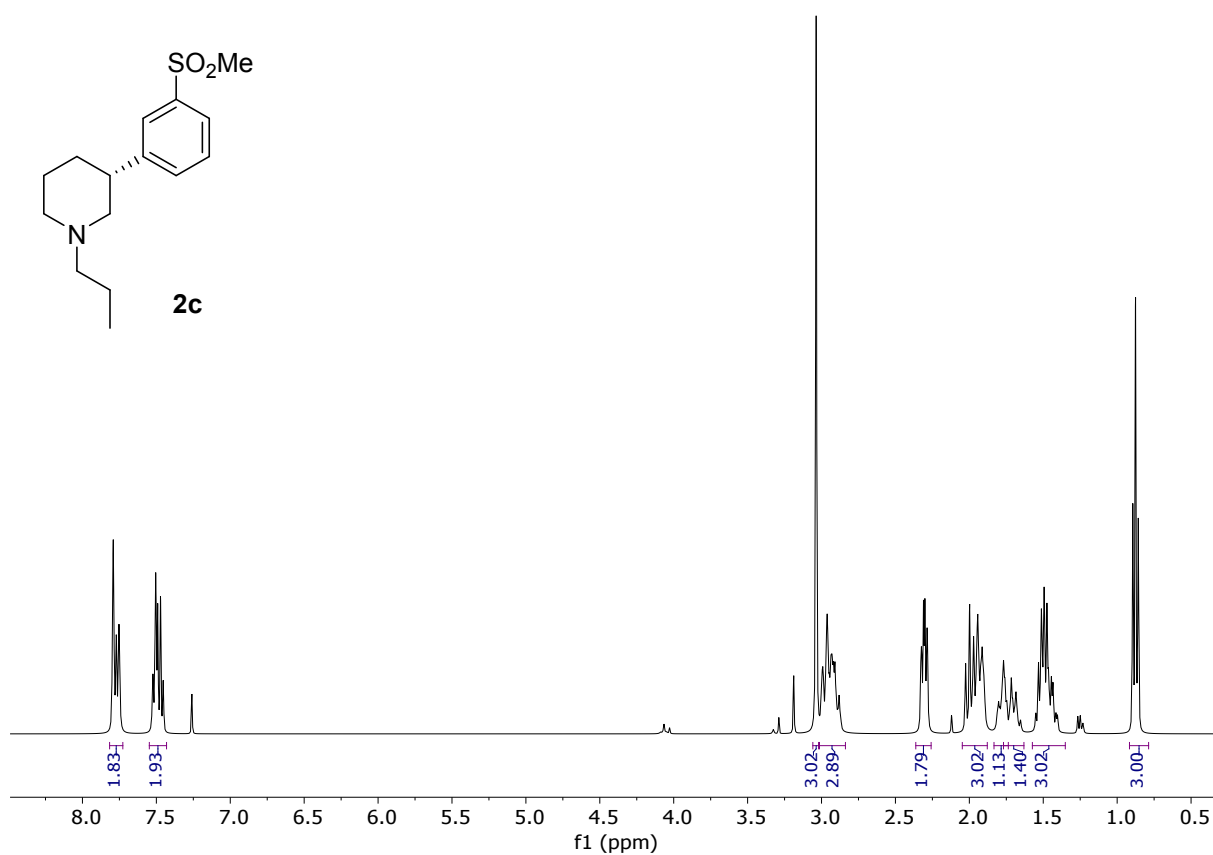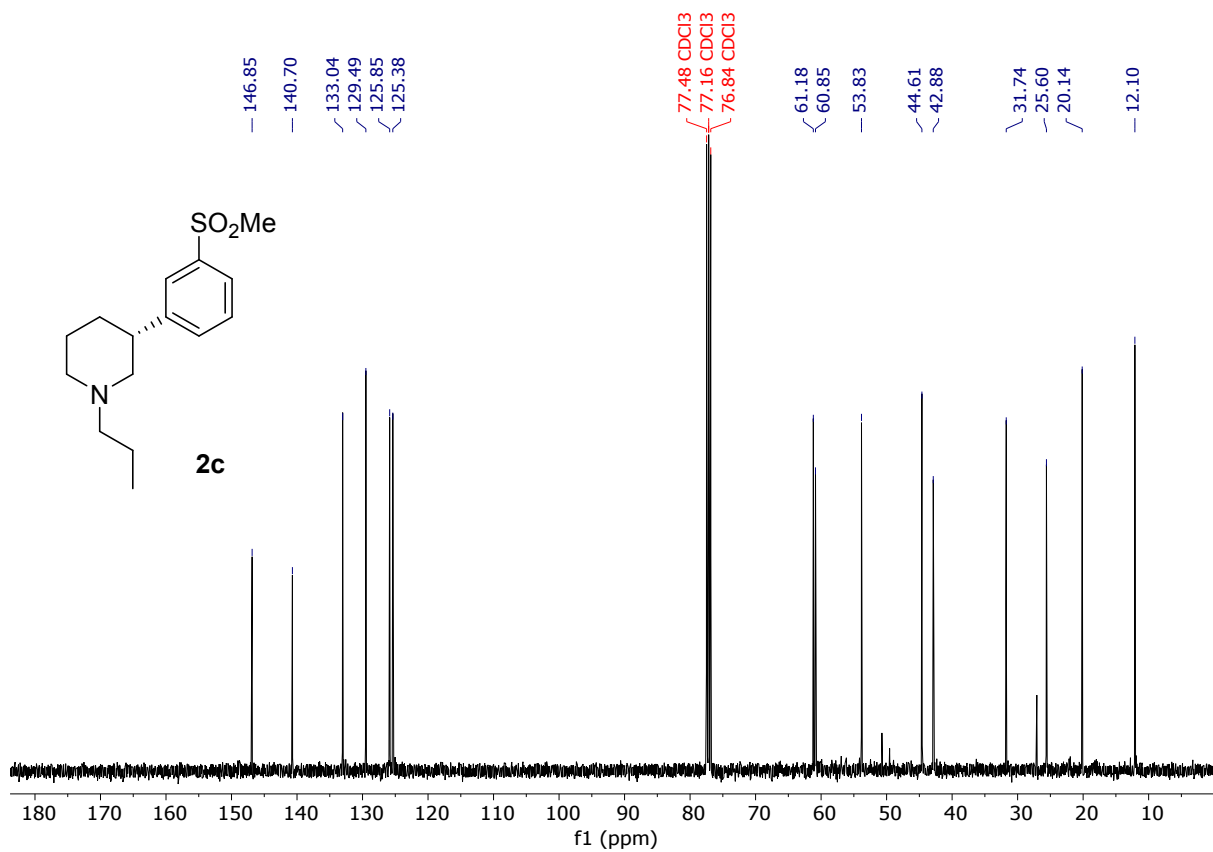

**<sup>1</sup>H & <sup>13</sup>C NMR spectra for (R)-1-allyl-3-(4-bromophenyl)piperidine (3c)**

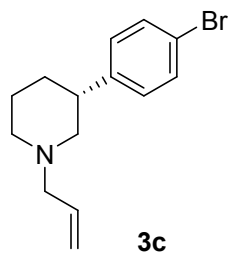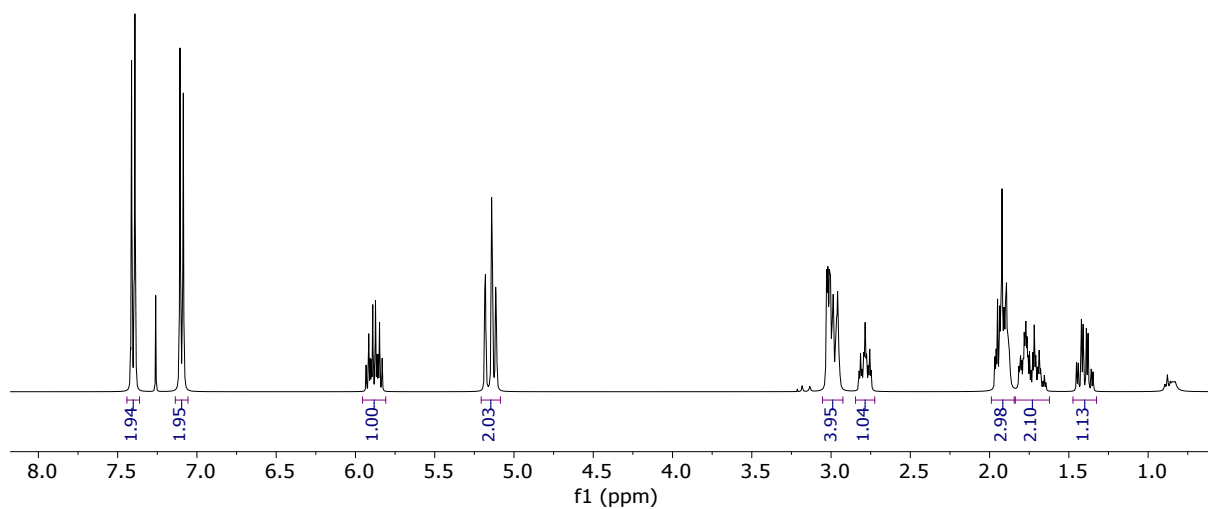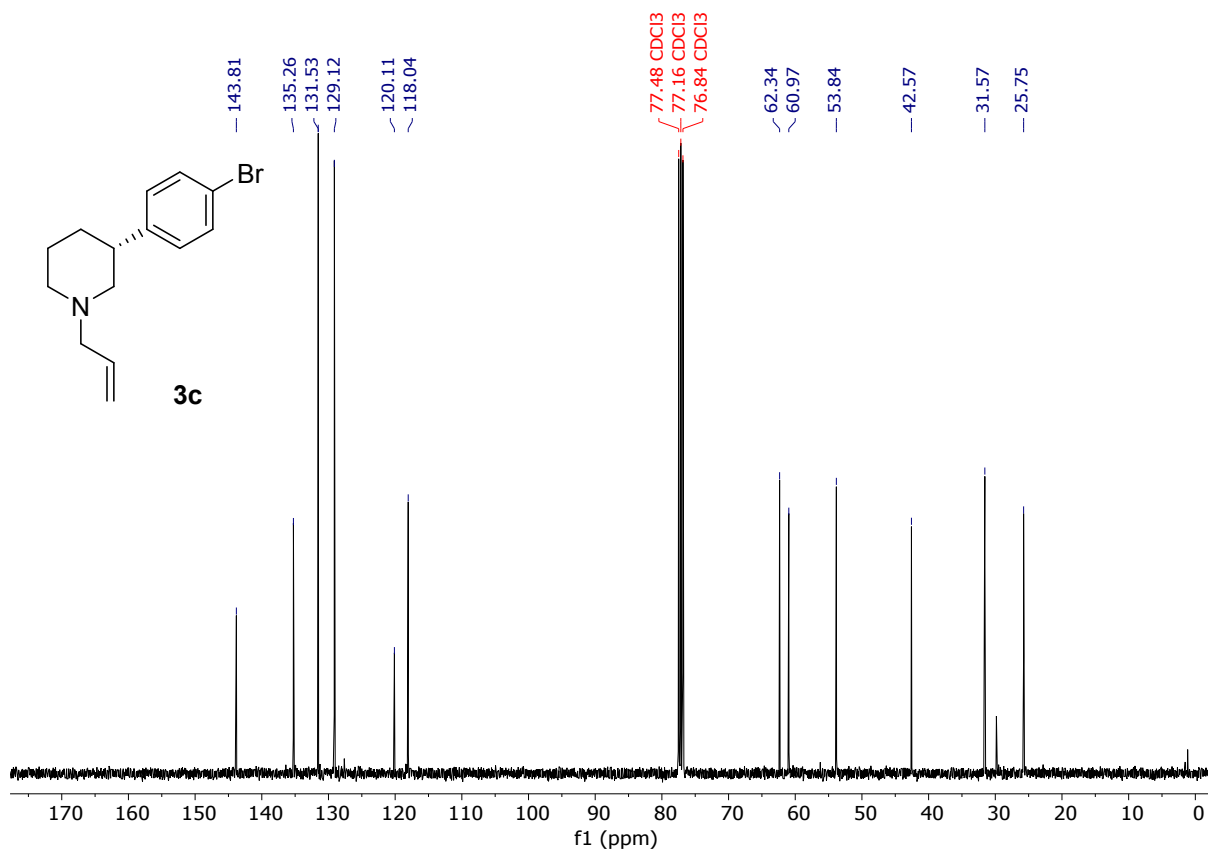

**<sup>1</sup>H & <sup>13</sup>C NMR spectra for (R)-3-(4-bromophenyl)piperidine (Crude-26)**

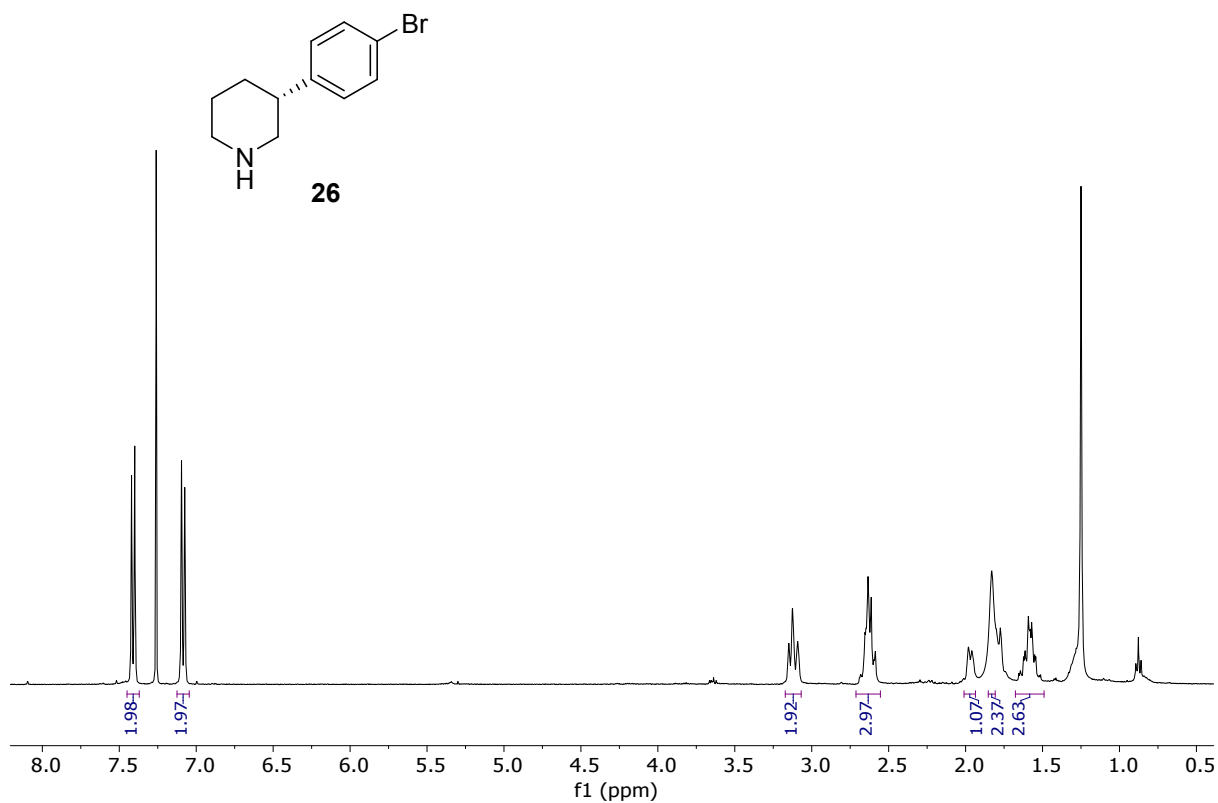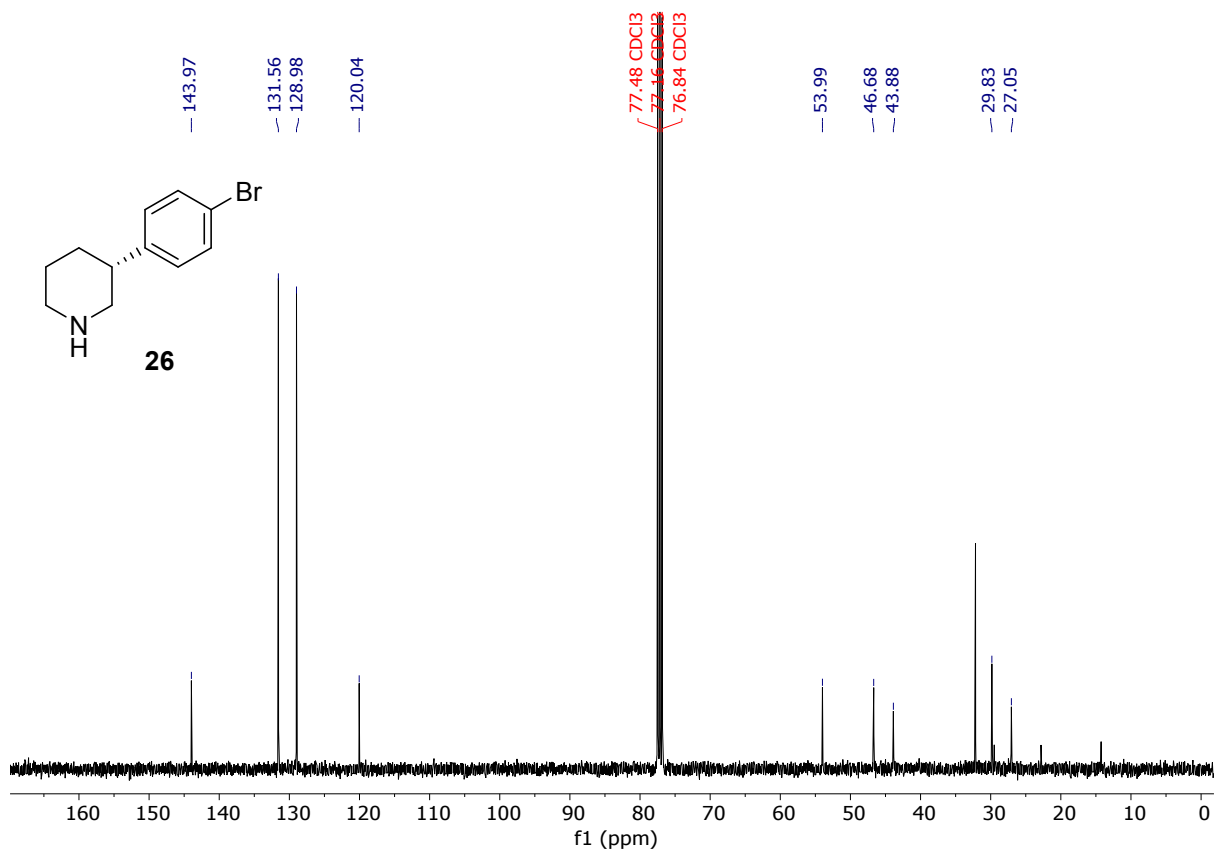

**<sup>1</sup>H & <sup>13</sup>C NMR spectra for *tert*-butyl (*R*)-3-(4-bromophenyl)piperidine-1-carboxylate (**23**)**

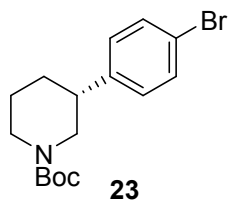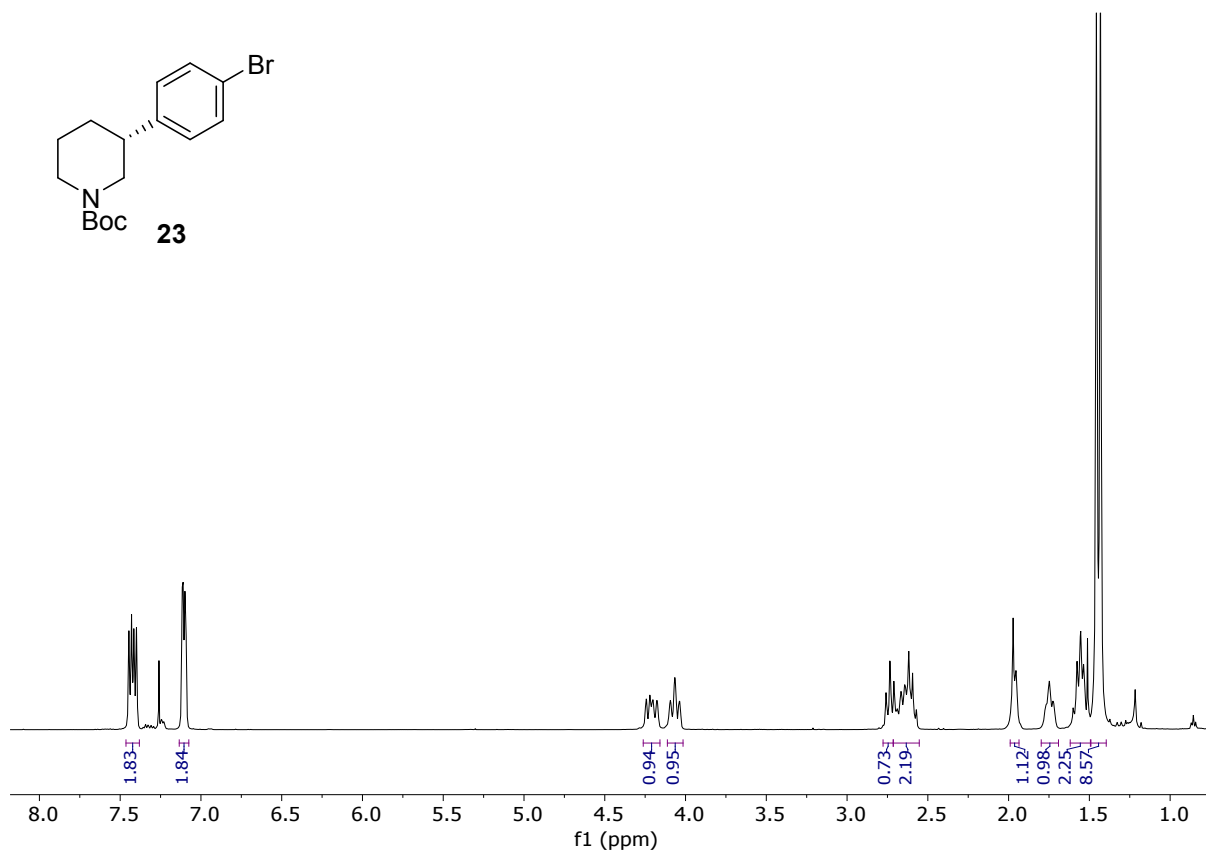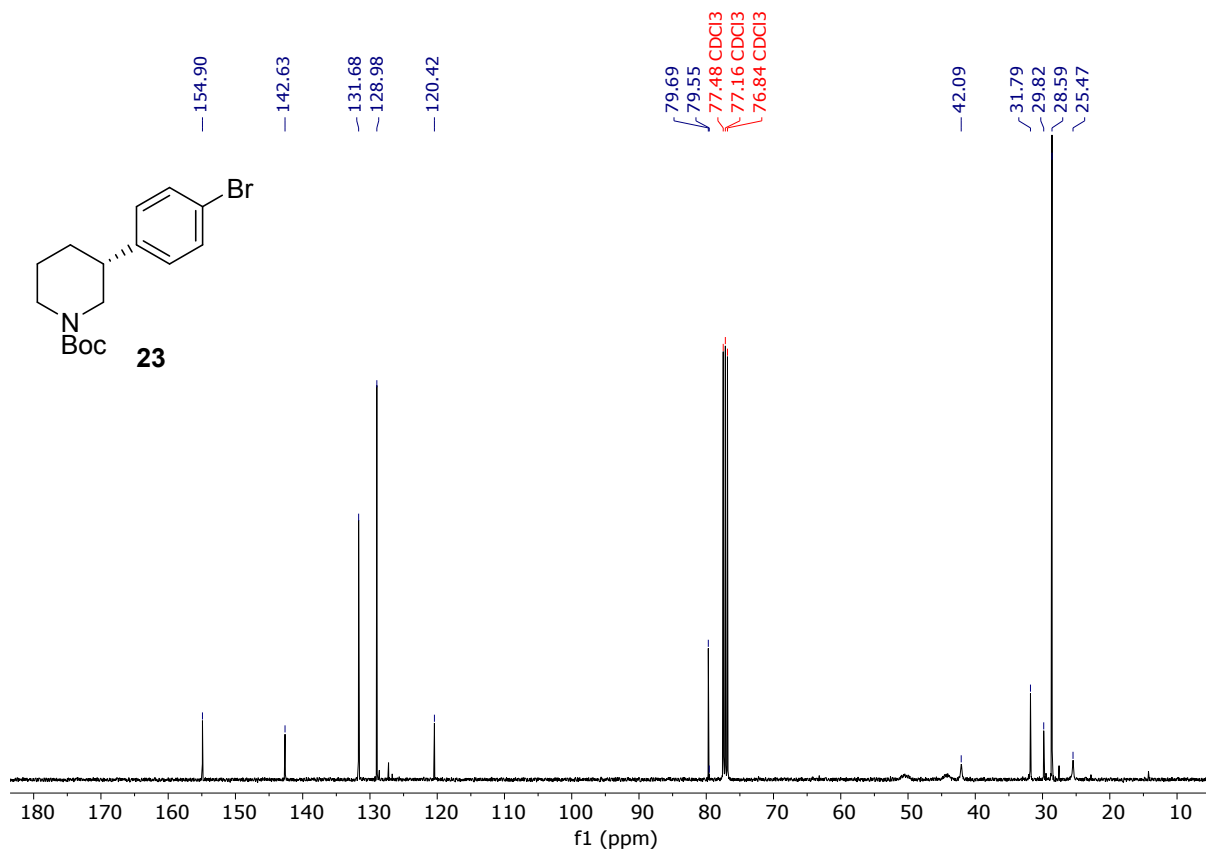

**<sup>1</sup>H & <sup>13</sup>C NMR spectra for (R)-4-(1-allylpiperidin-3-yl)aniline (4c)**

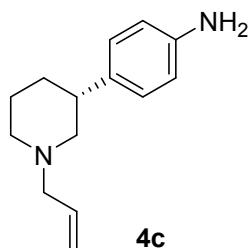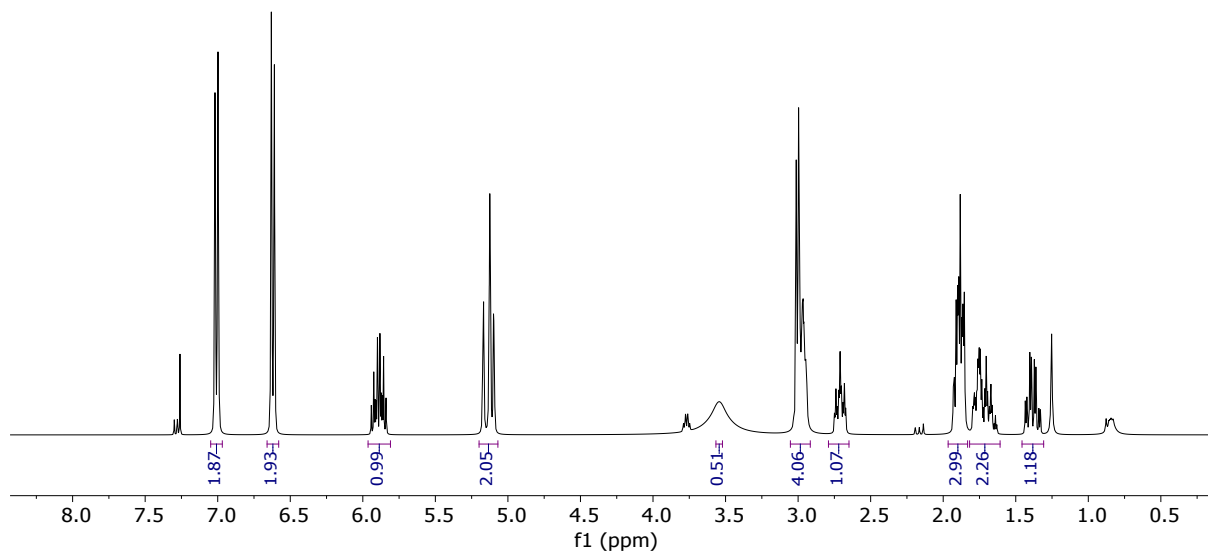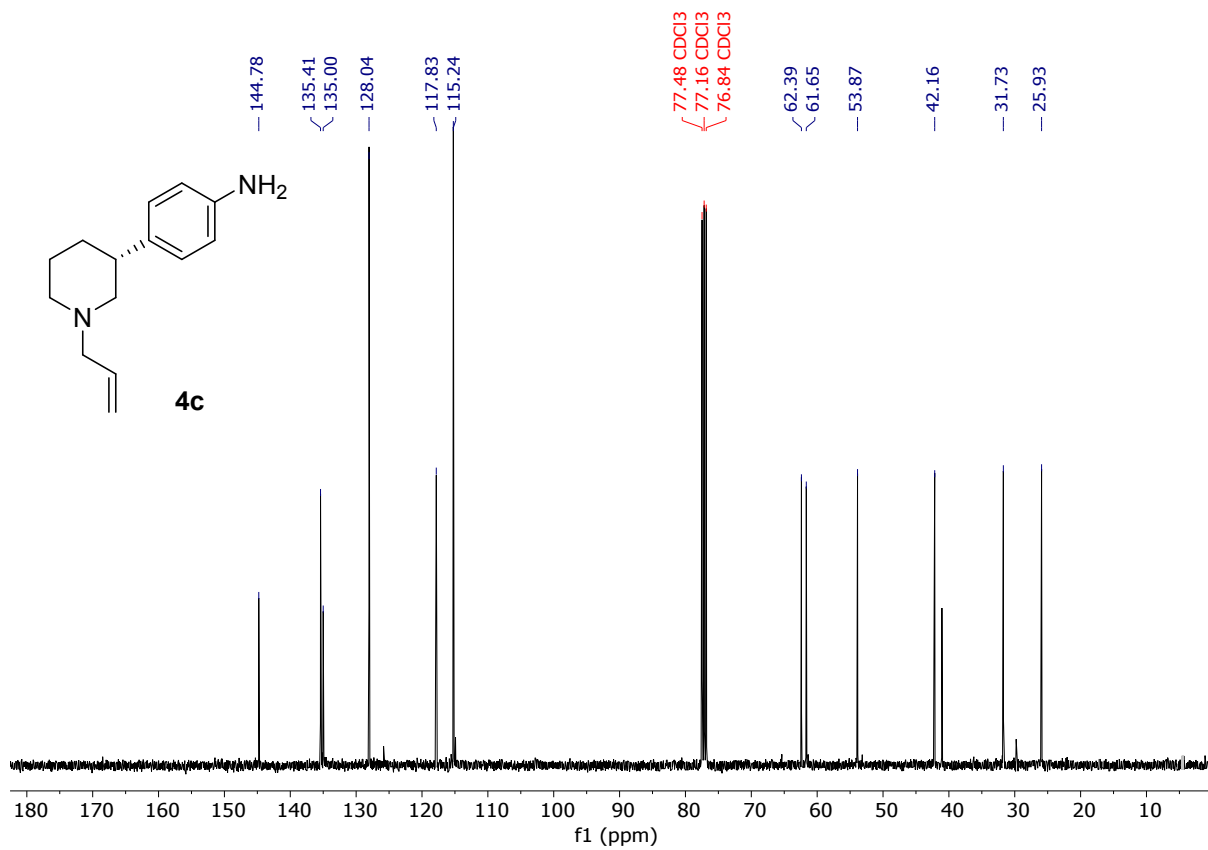



**<sup>1</sup>H & <sup>13</sup>C NMR spectra for (R)-4-(piperidin-3-yl)aniline (Crude-27)**

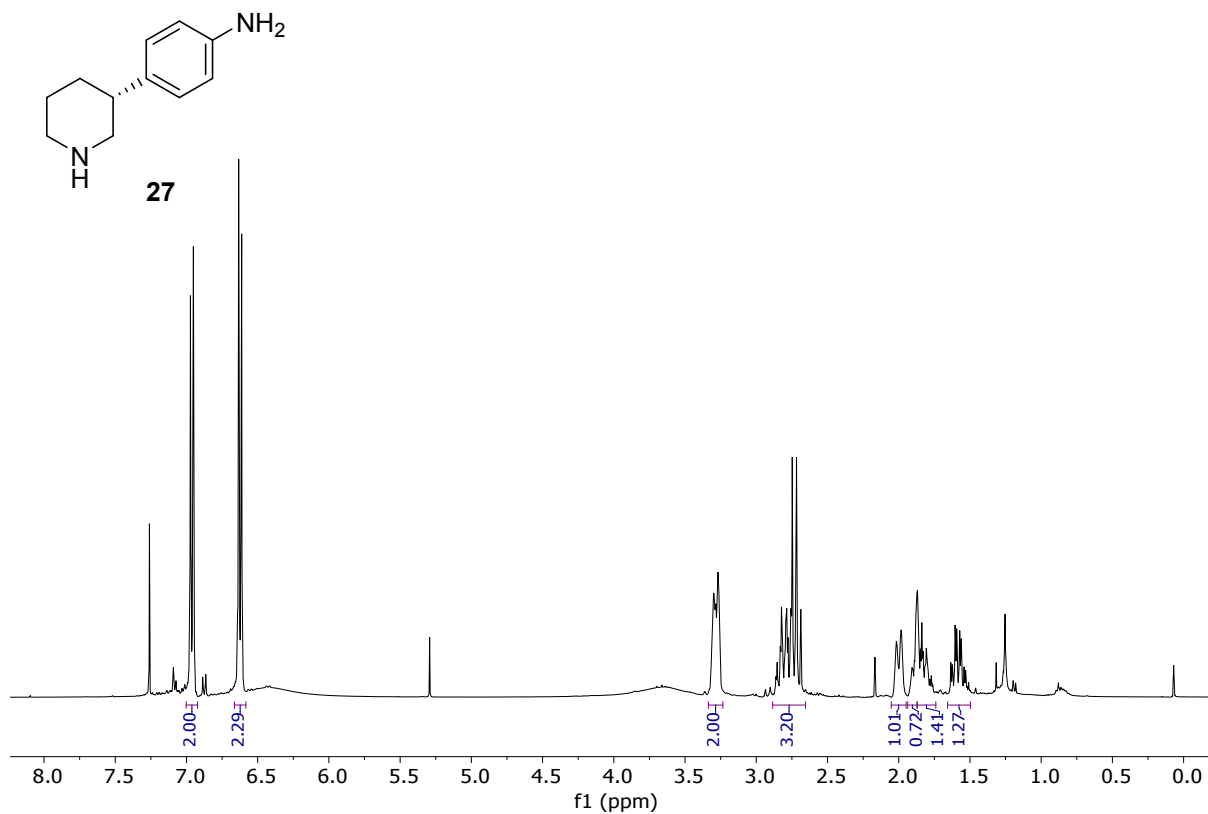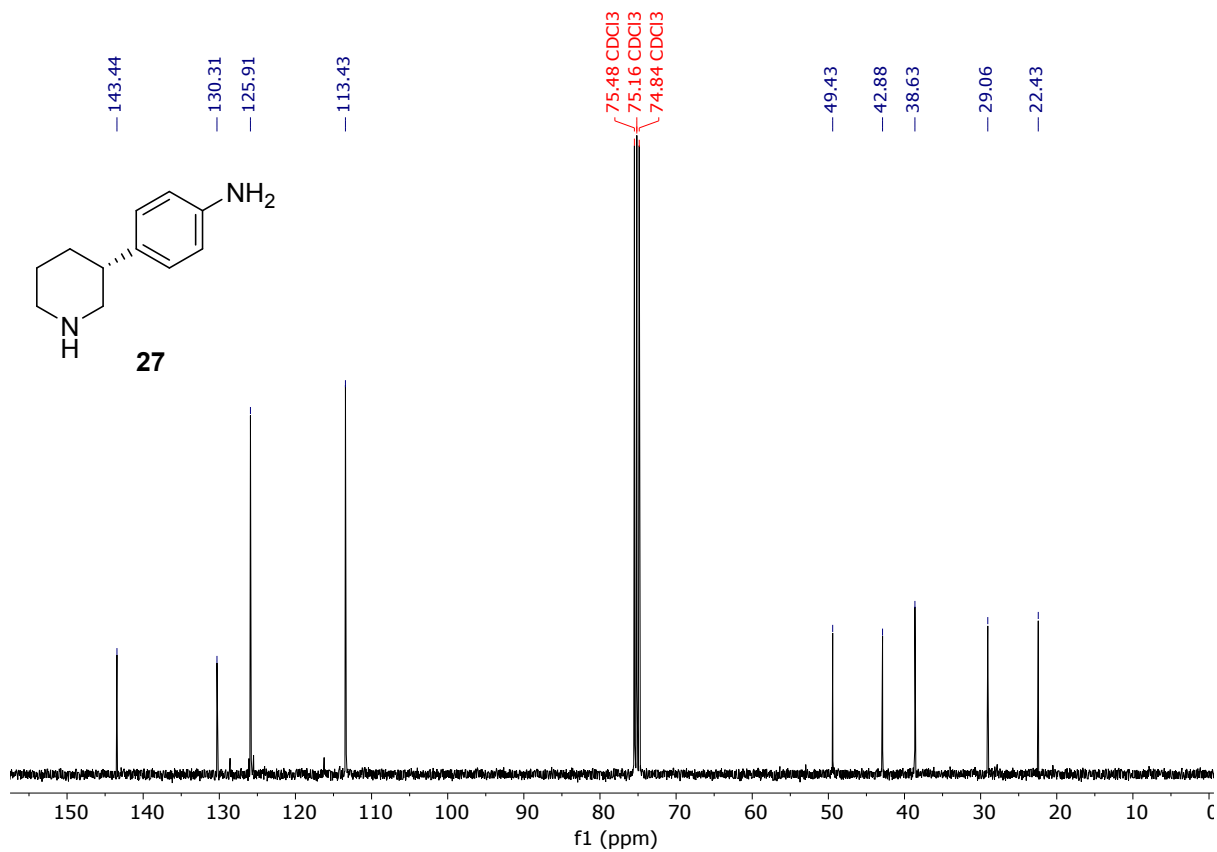

**<sup>1</sup>H & <sup>13</sup>C NMR spectra for *tert*-butyl (*R*)-3-(4-aminophenyl)piperidine-1-carboxylate (**24**)**

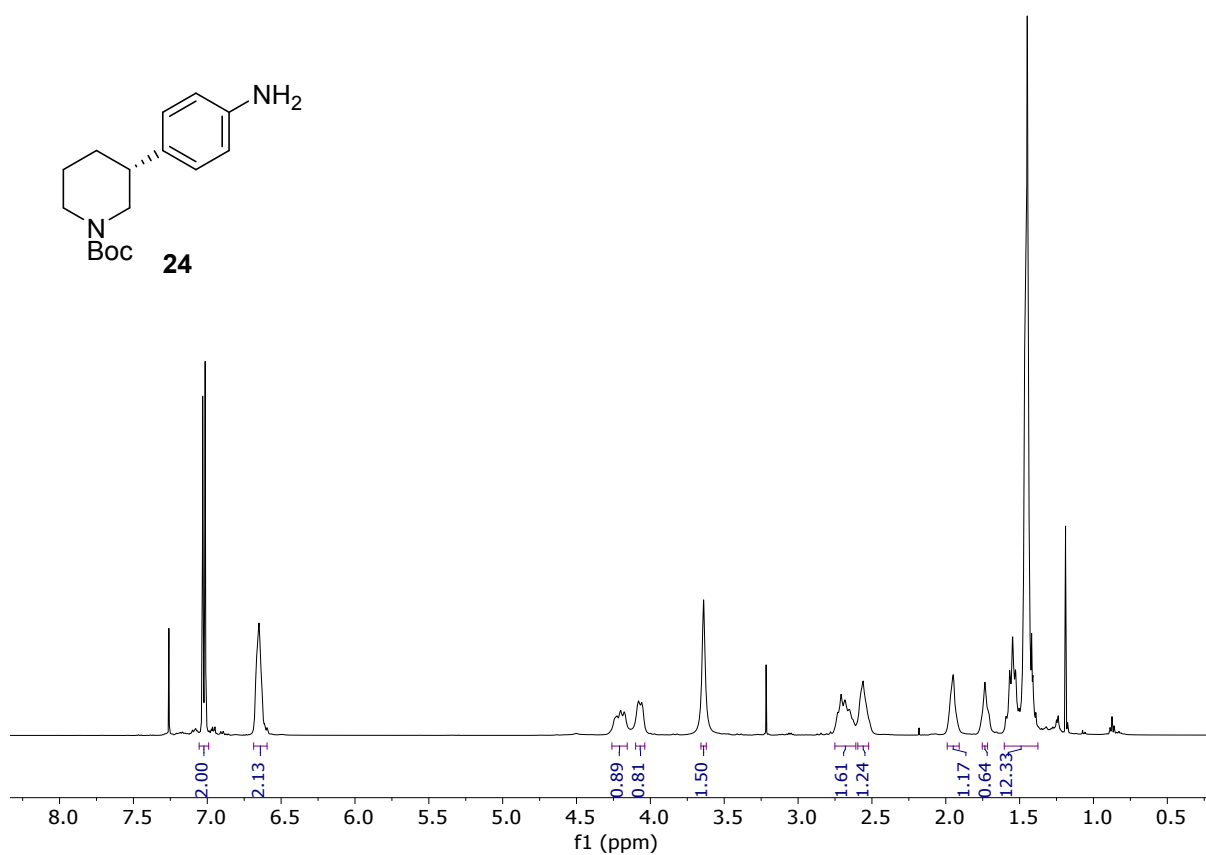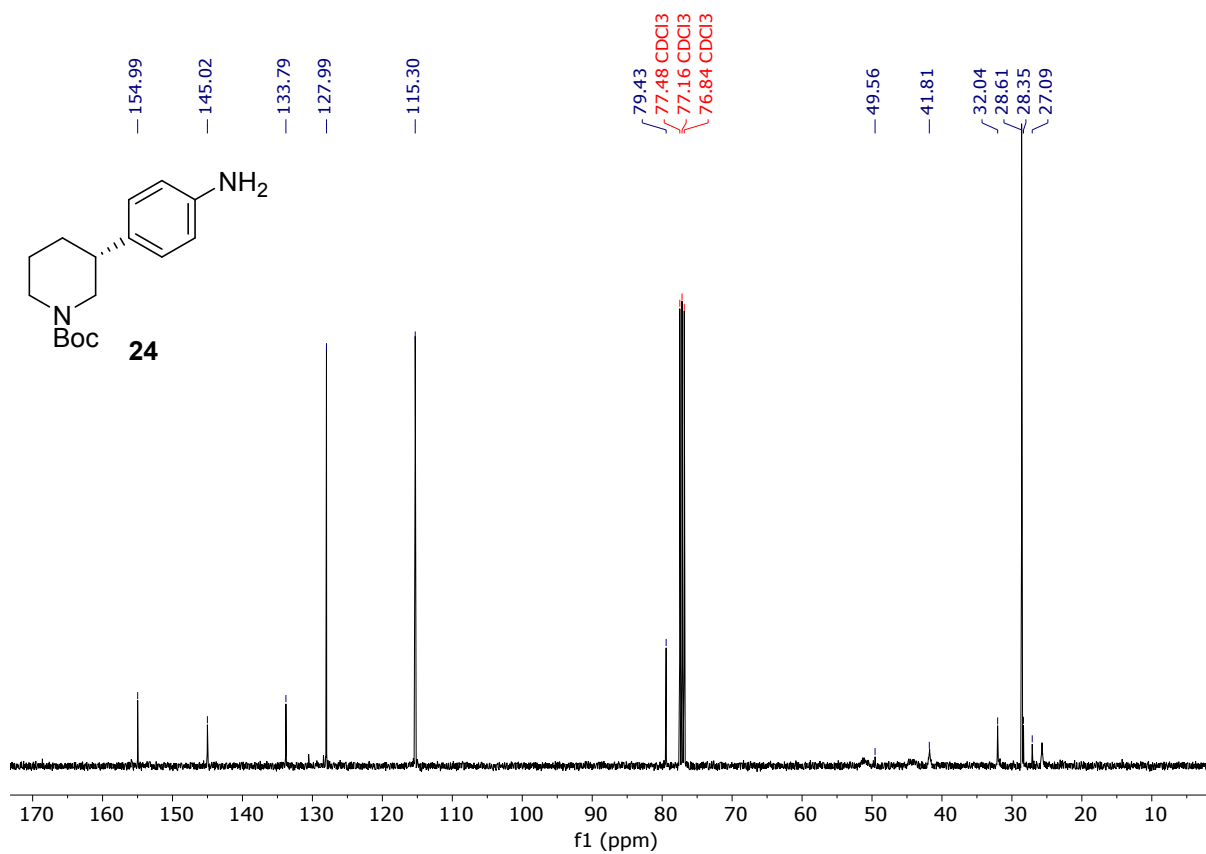

**<sup>1</sup>H & <sup>13</sup>C NMR spectra for (R)-1-ethyl-3-phenylpiperidine (5c)**

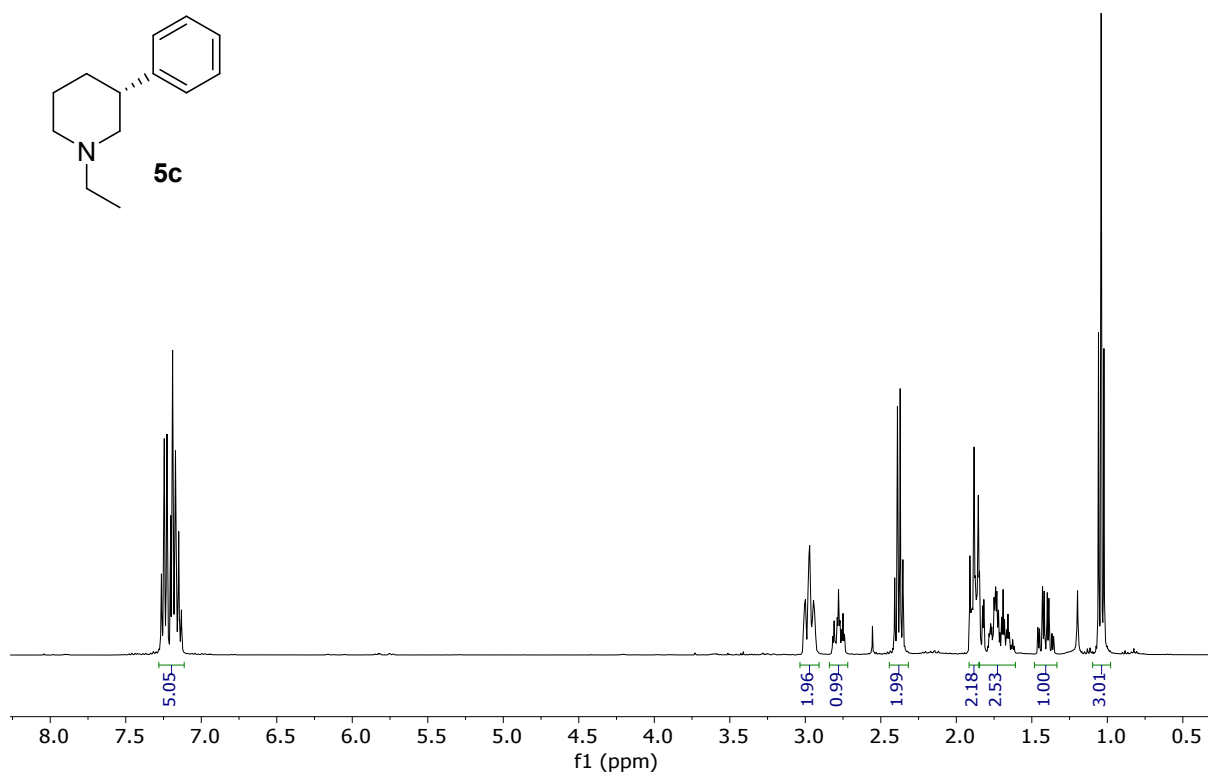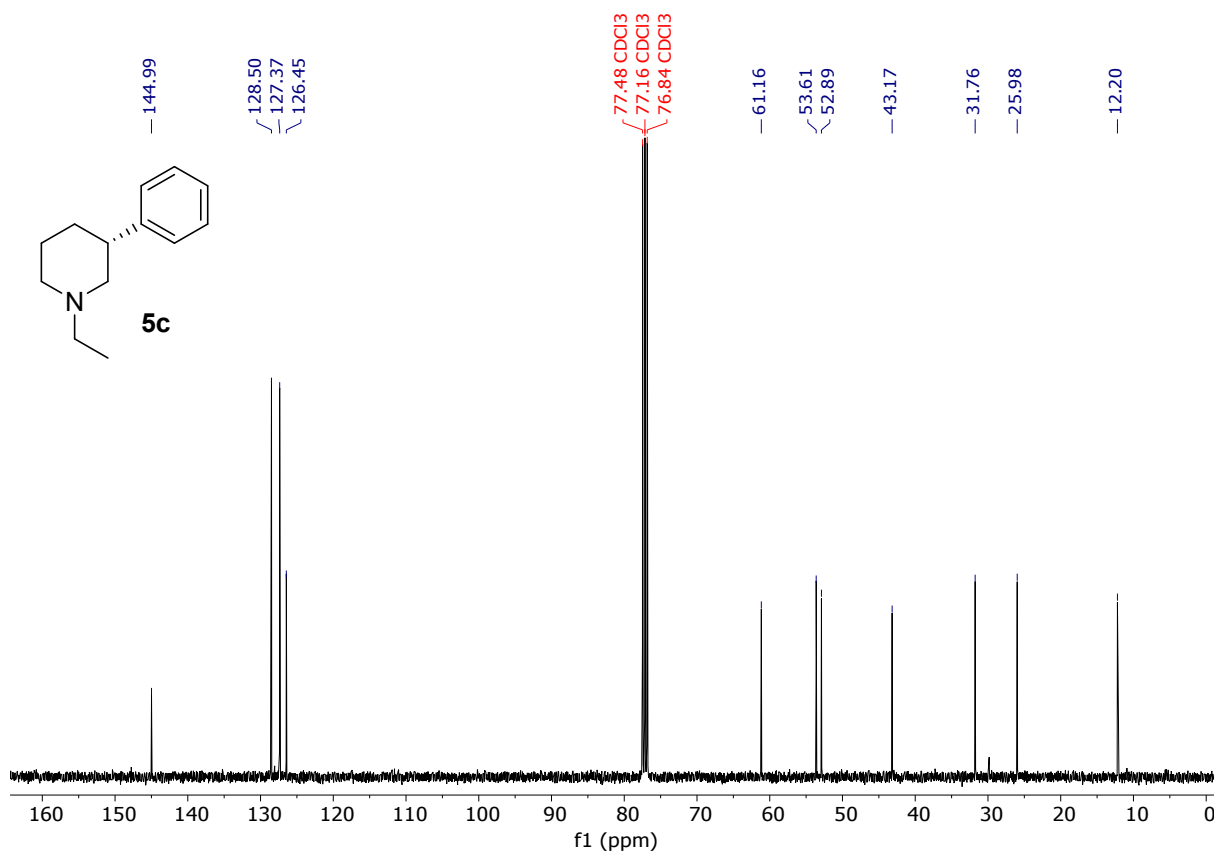

**<sup>1</sup>H & <sup>13</sup>C NMR spectra for (R)-1-ethyl-3-(4-fluorophenyl)piperidine (6c)**

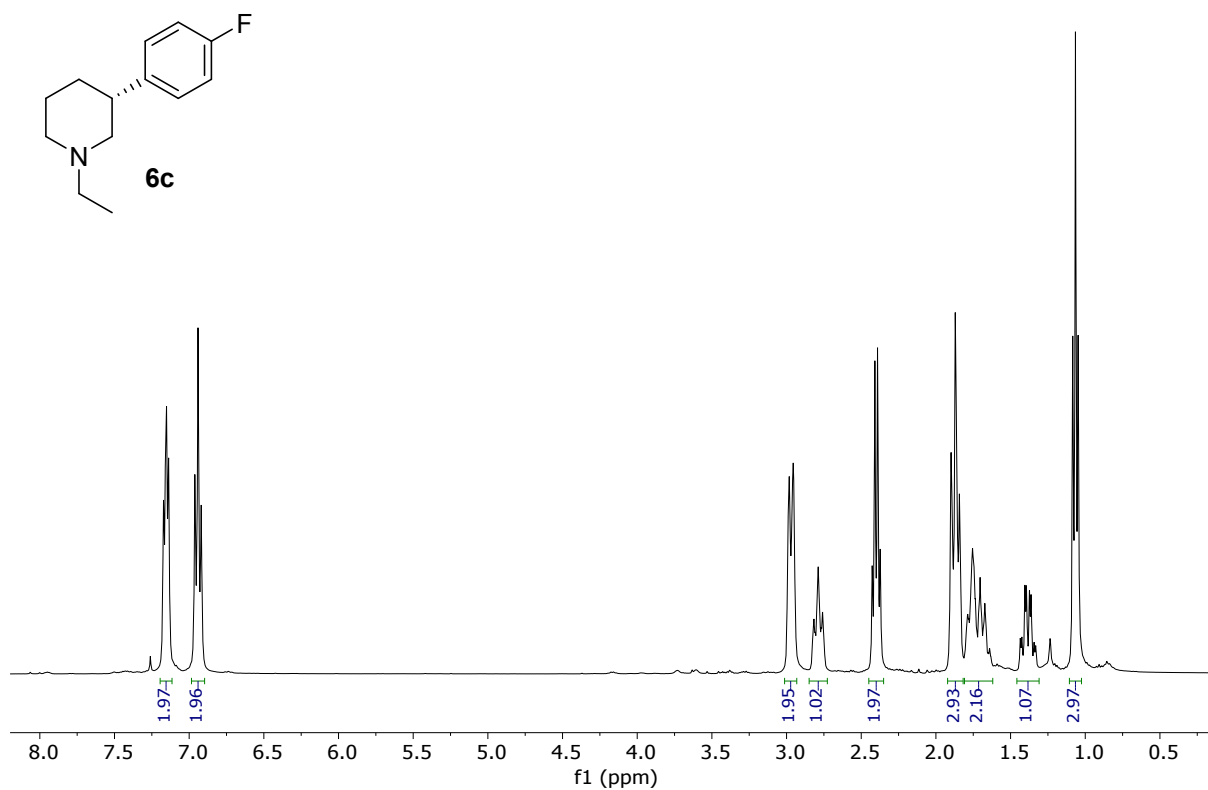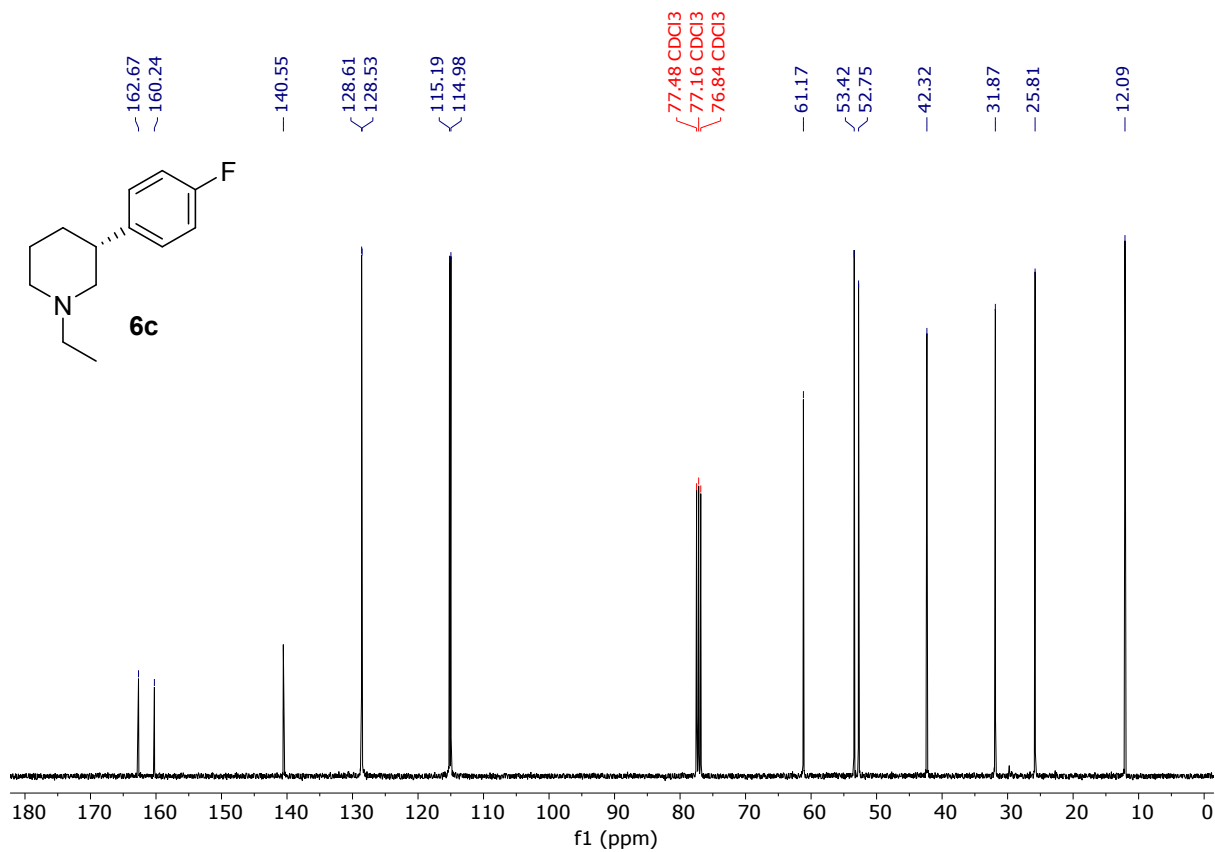

**<sup>1</sup>H & <sup>13</sup>C NMR spectra for (R)-1-ethyl-3-(4-methoxyphenyl)piperidine (7c)**

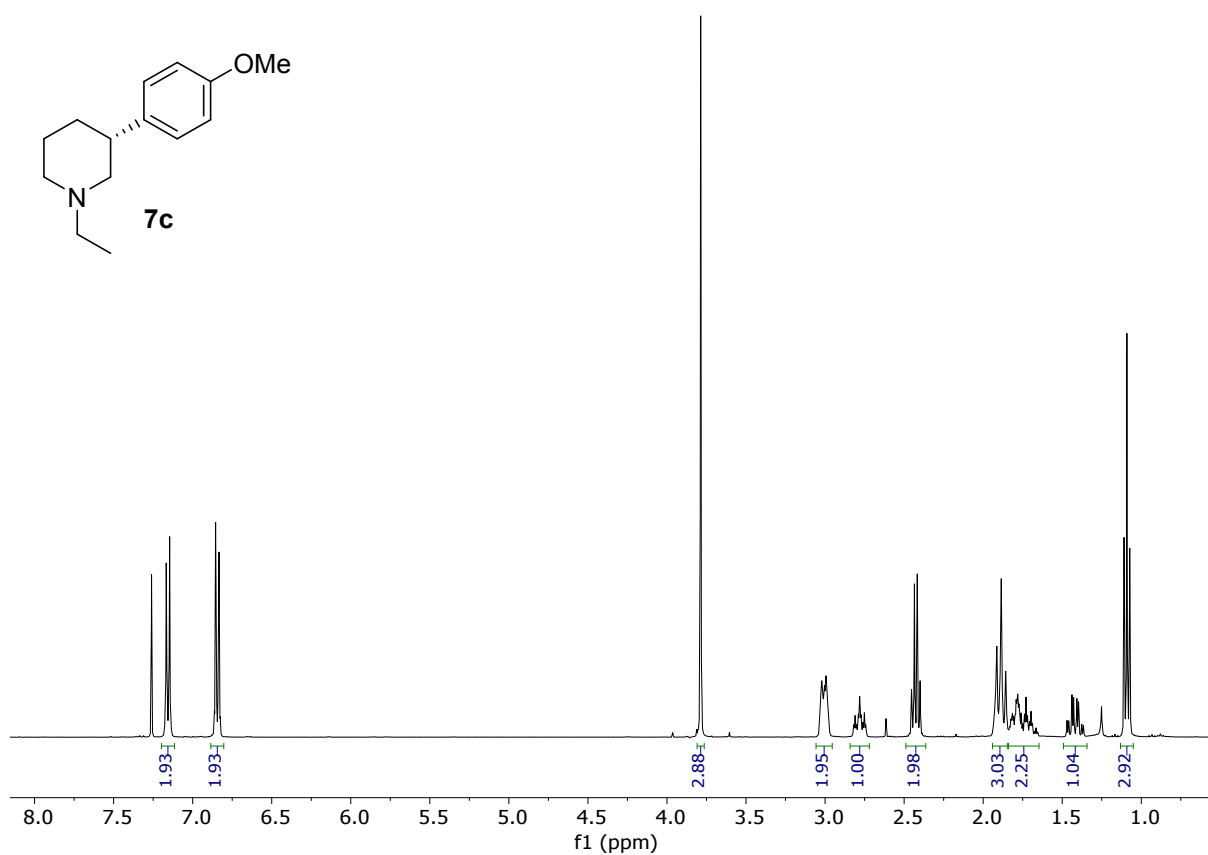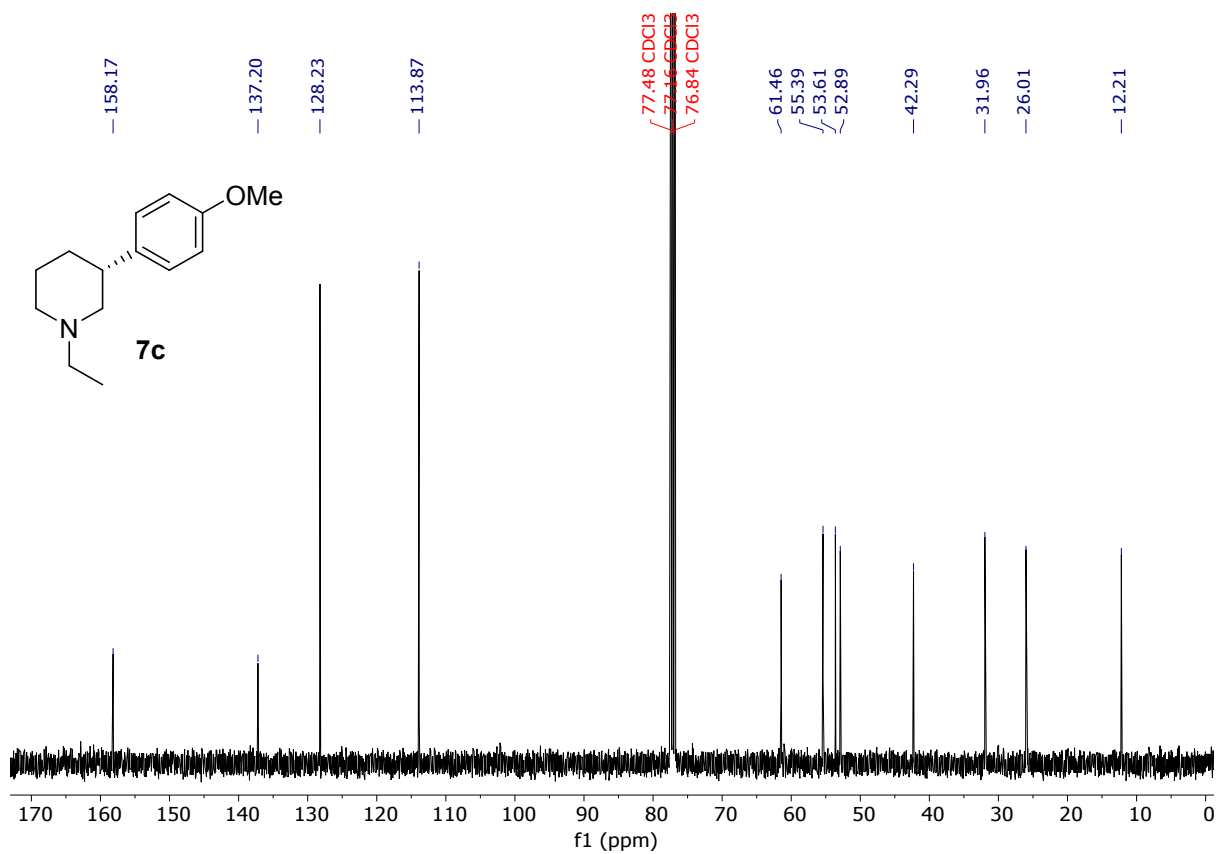

**<sup>1</sup>H & <sup>13</sup>C NMR spectra for (S)-1-ethyl-3-(furan-2-yl)piperidine (8c)**

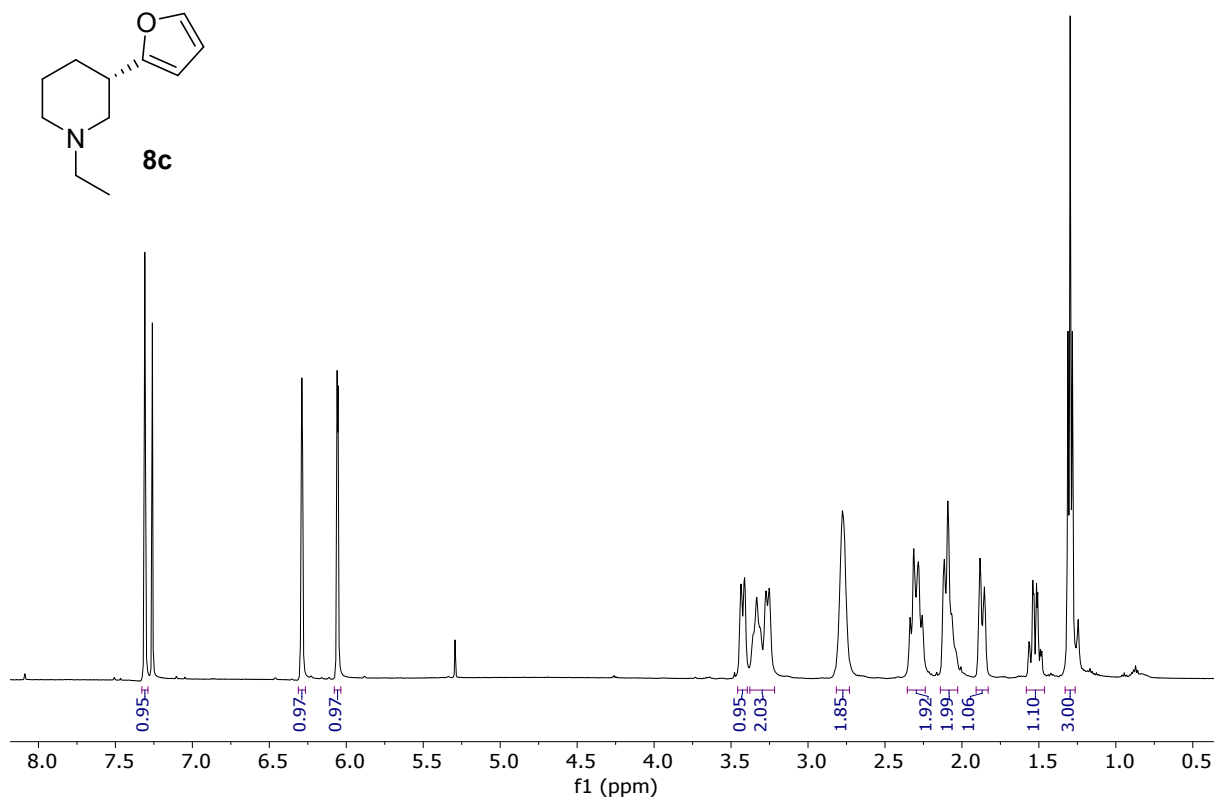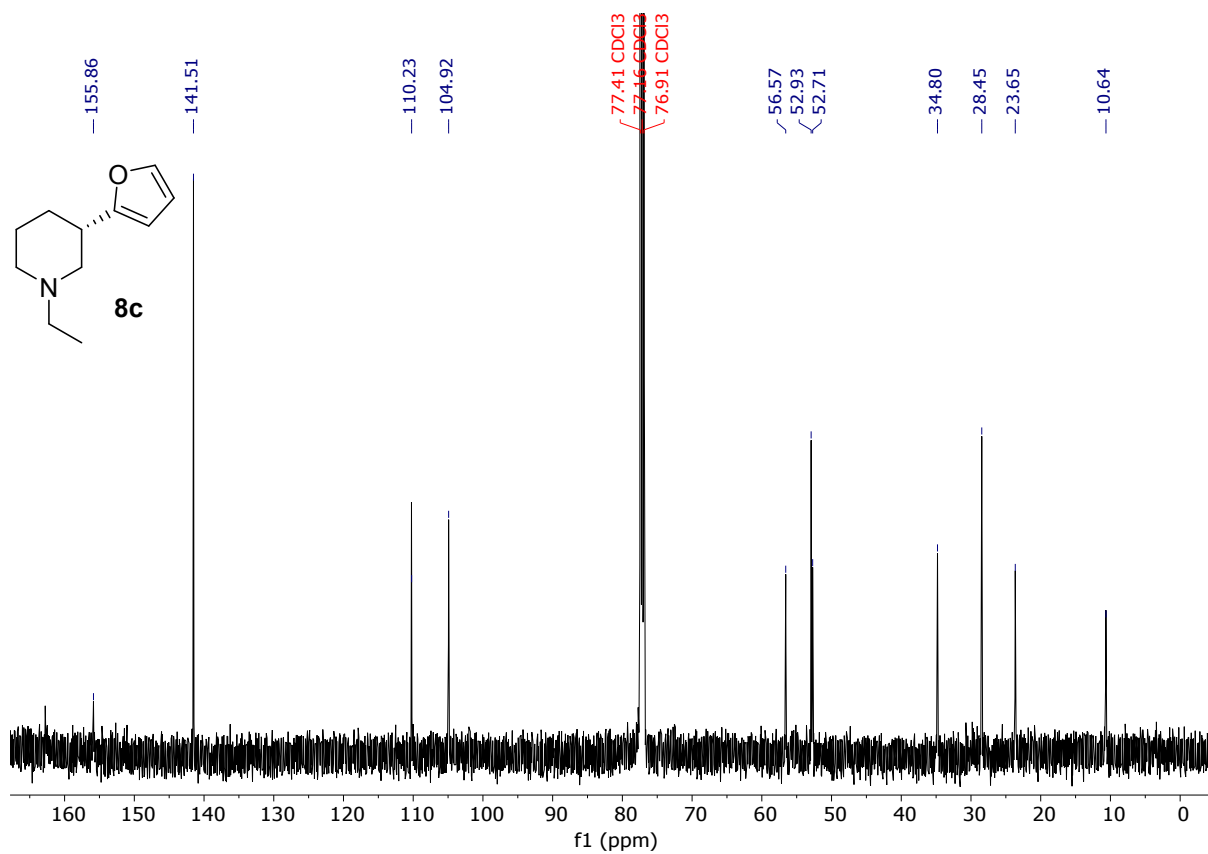

**<sup>1</sup>H & <sup>13</sup>C NMR spectra for (S)-1-ethyl-3-(thiophen-2-yl)piperidine (9c)**

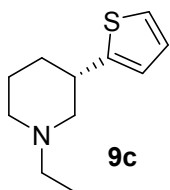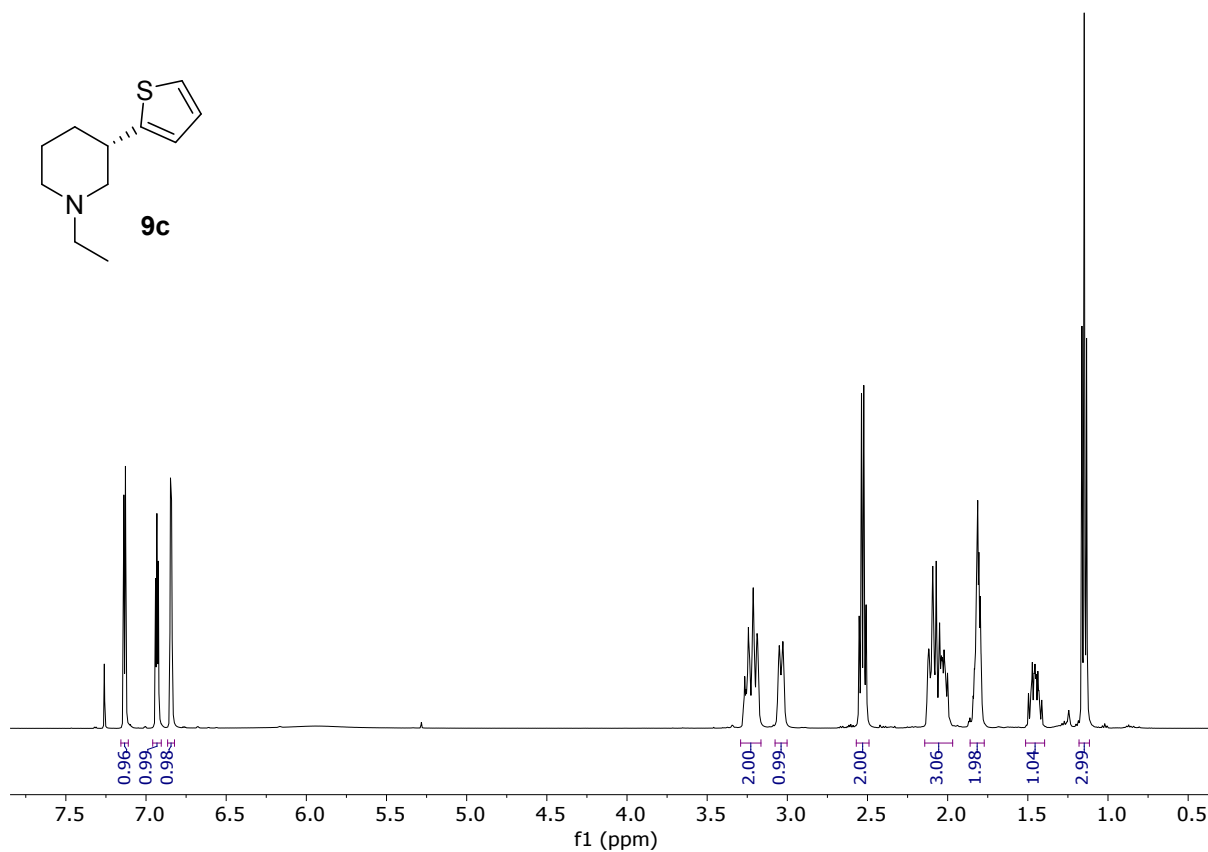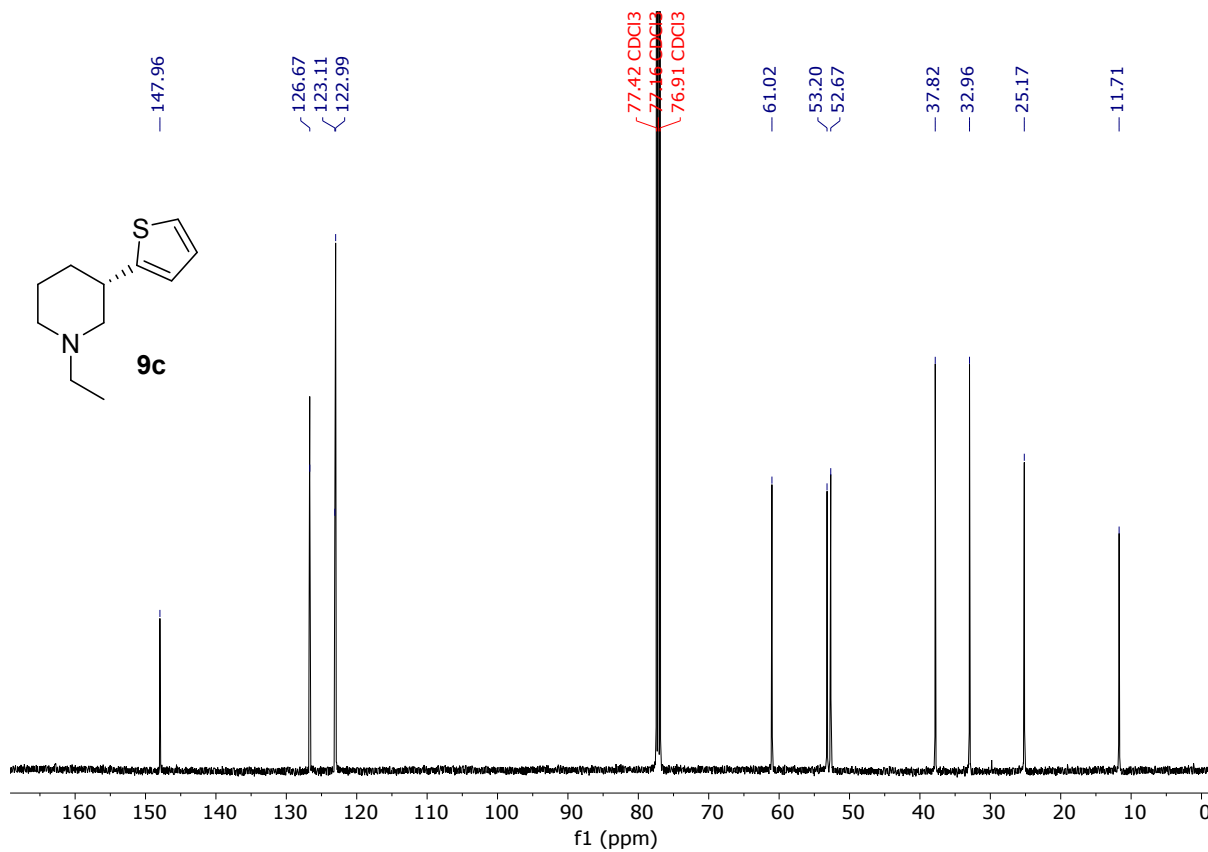

**<sup>1</sup>H & <sup>13</sup>C NMR spectra for 1-ethyl-5-(naphthalen-2-yl)-1,2,3,4-THP (10e)**

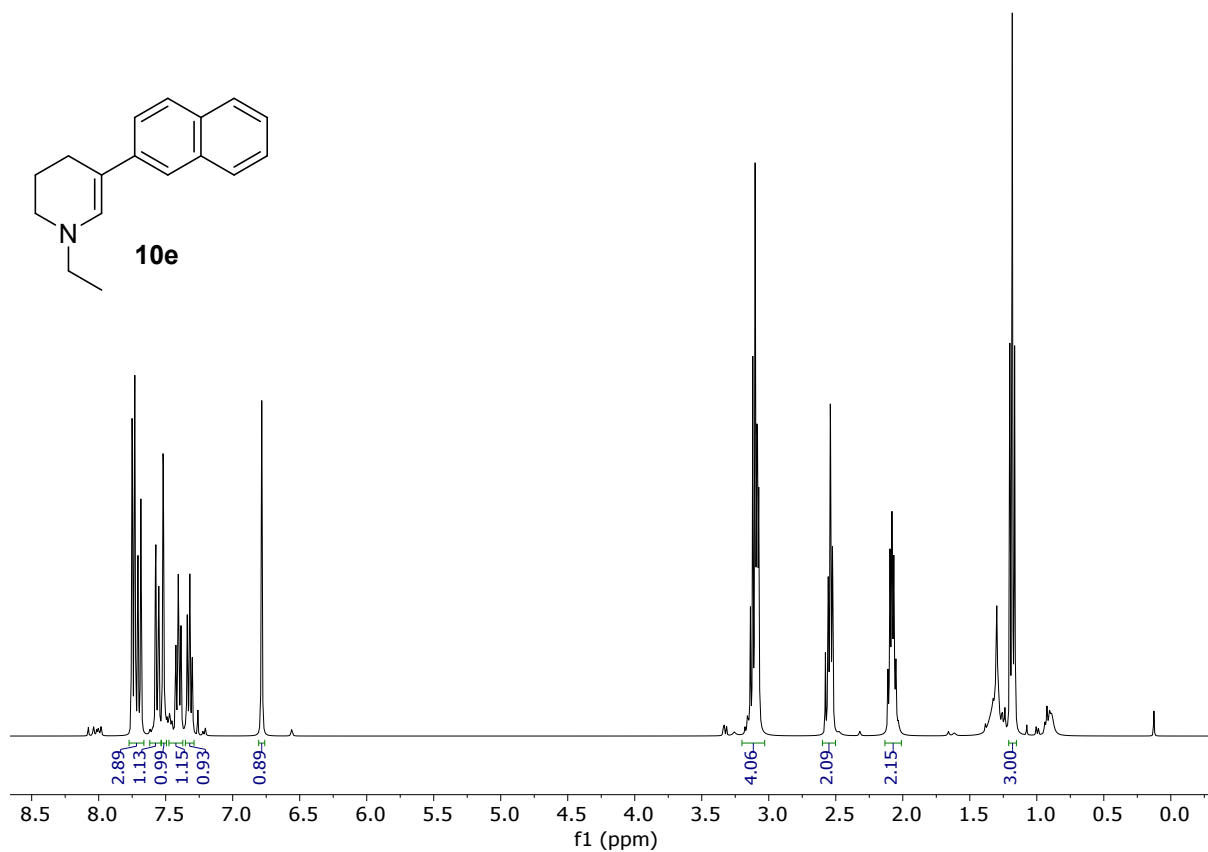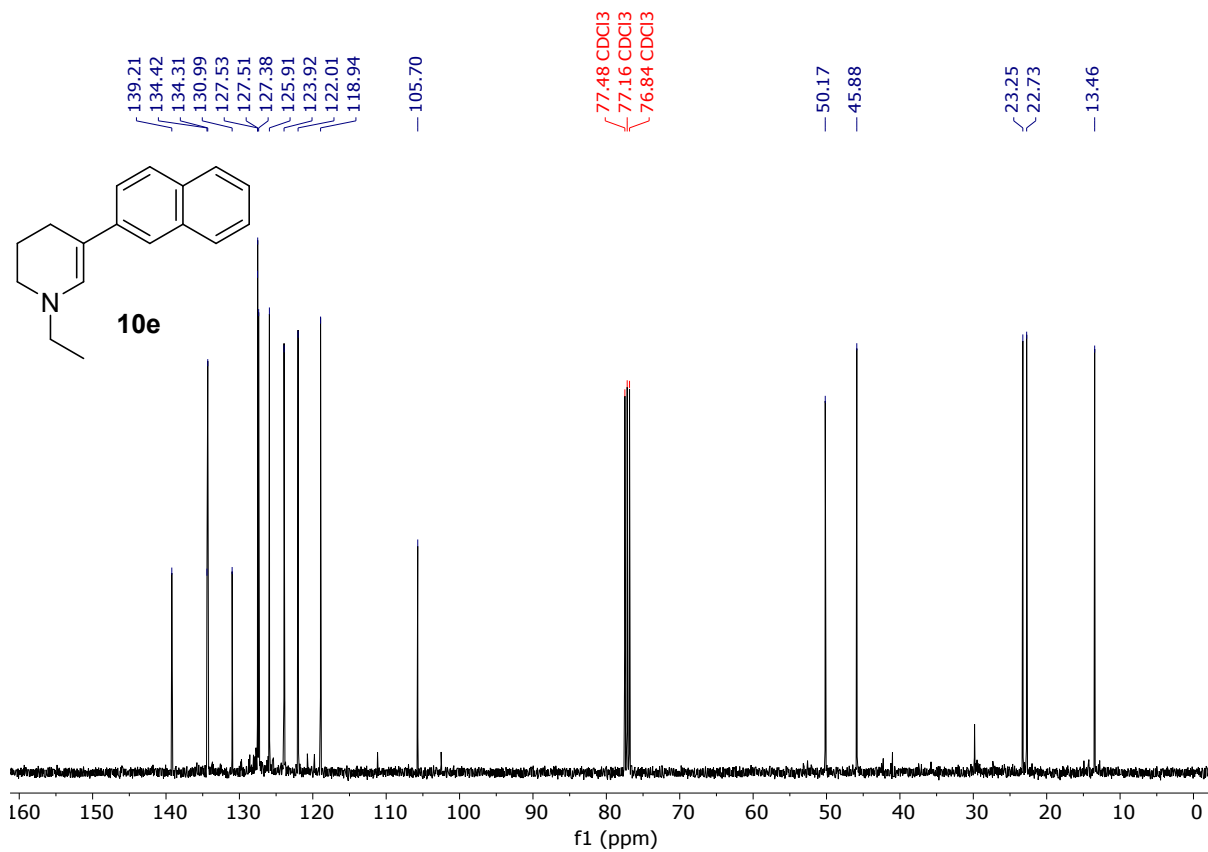



**<sup>1</sup>H & <sup>13</sup>C NMR spectra for (R)-1-ethyl-3-(naphthalen-2-yl)piperidine (10c)**

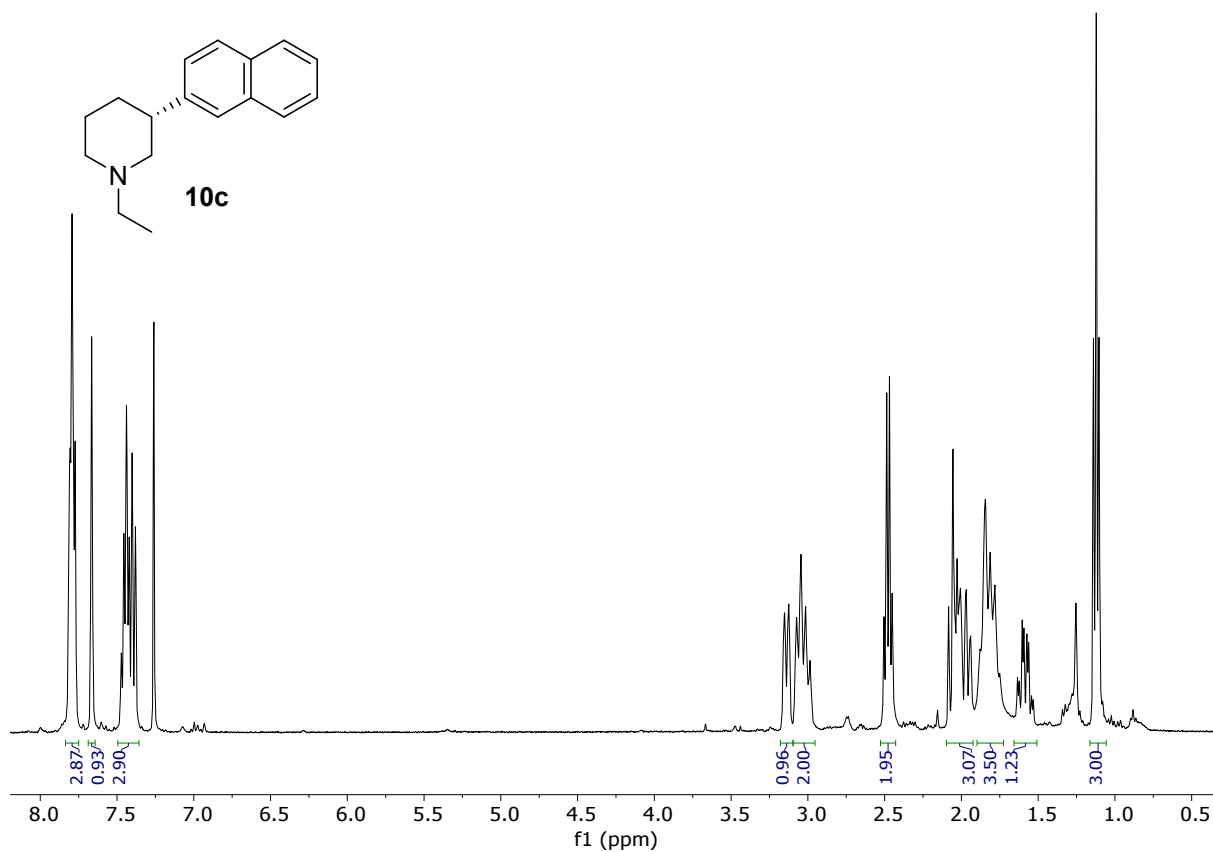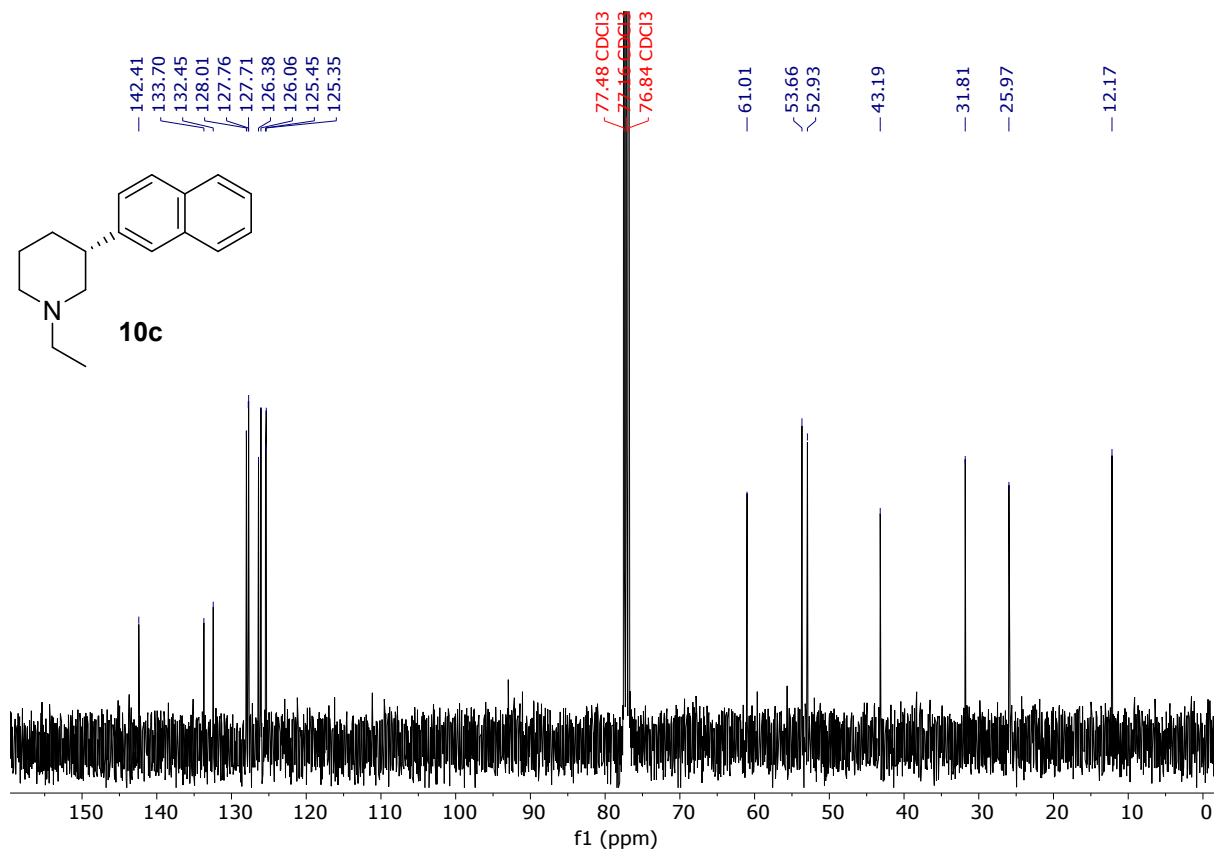

**<sup>1</sup>H & <sup>13</sup>C NMR spectra for (3A)-1-ethyl-3-(naphthalen-2-yl)piperidine-2-d (10c)**

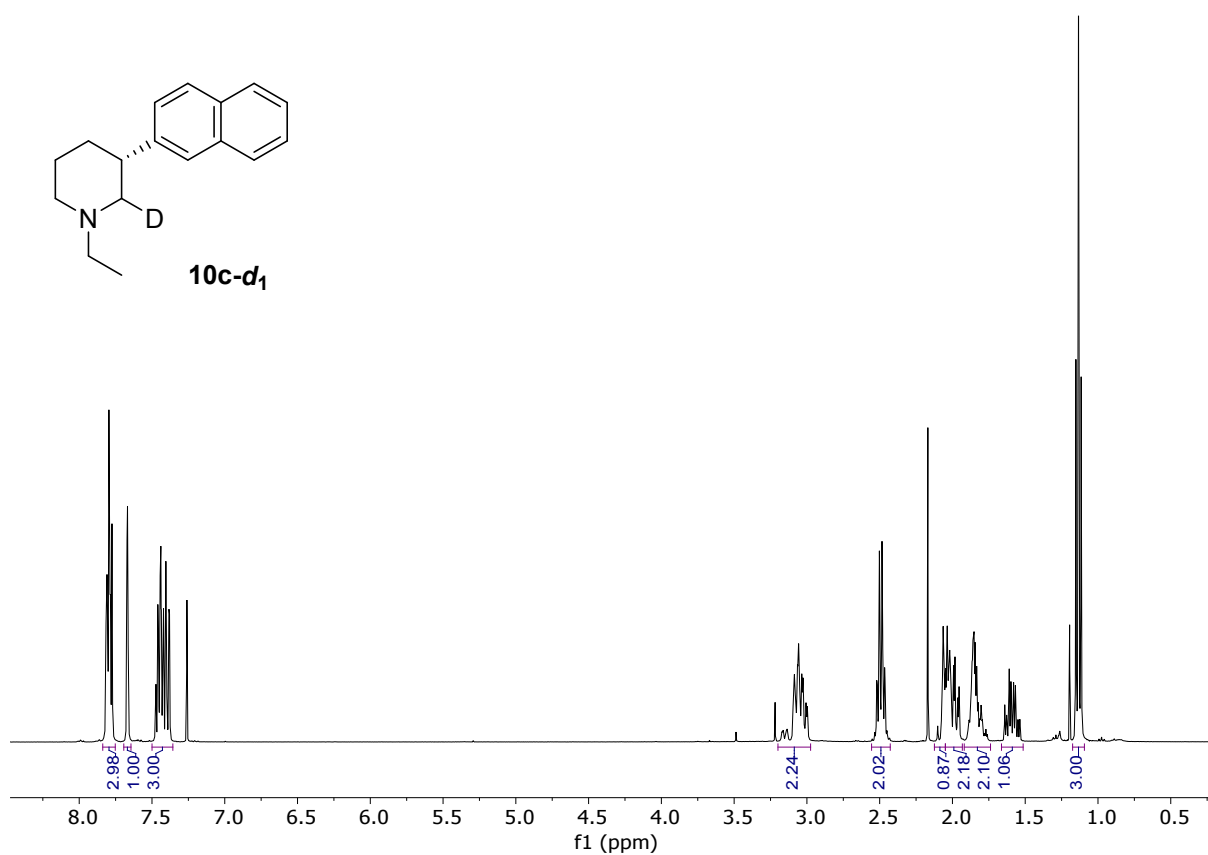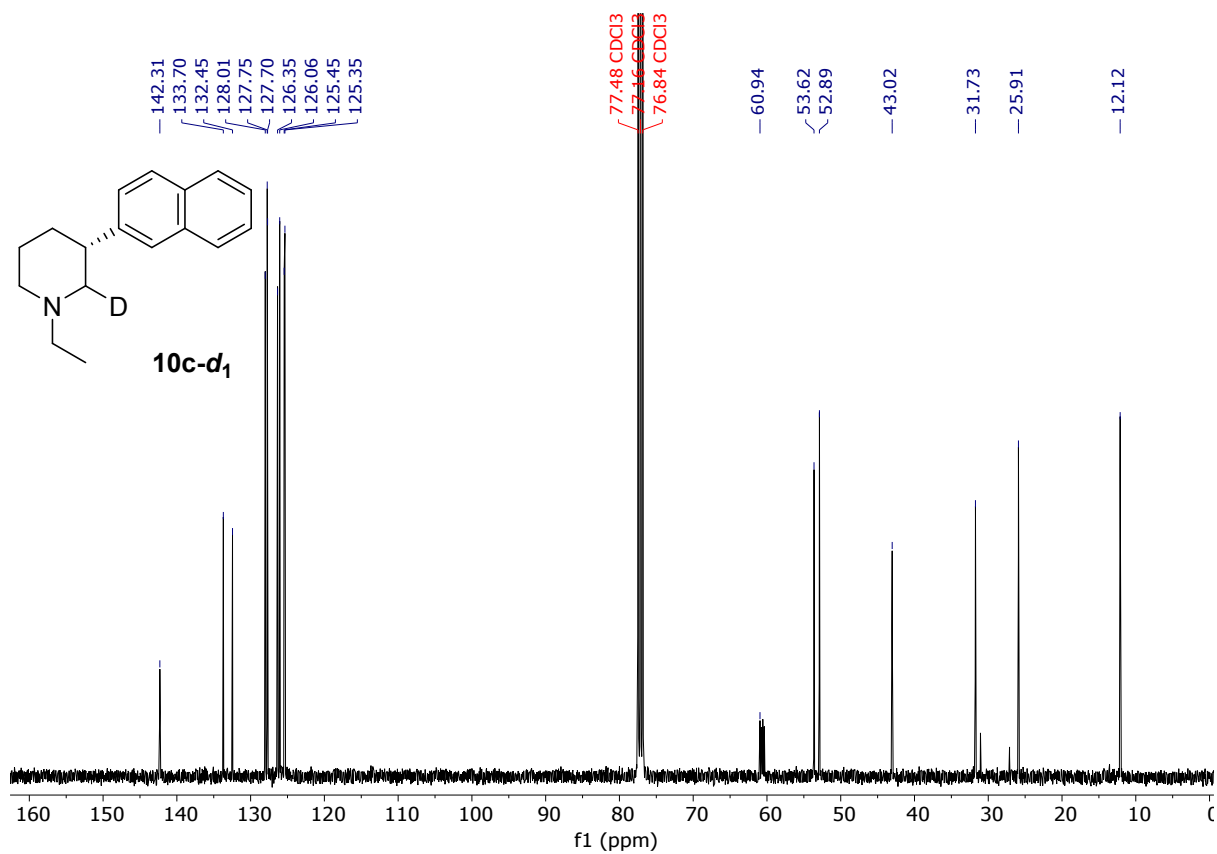

**<sup>1</sup>H & <sup>13</sup>C NMR spectra for (3A)-1-ethyl-3-(naphthalen-2-yl)piperidine-2,4-d<sub>2</sub> (10c)**

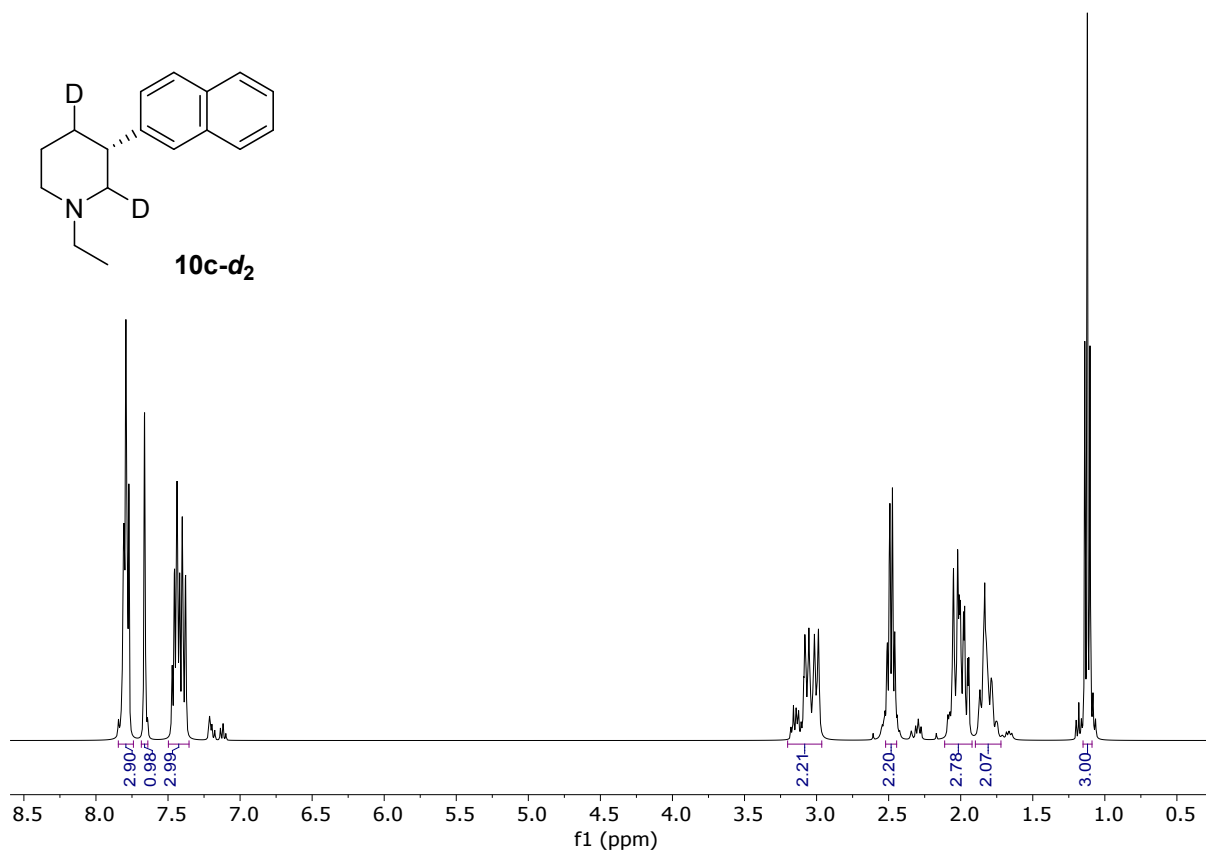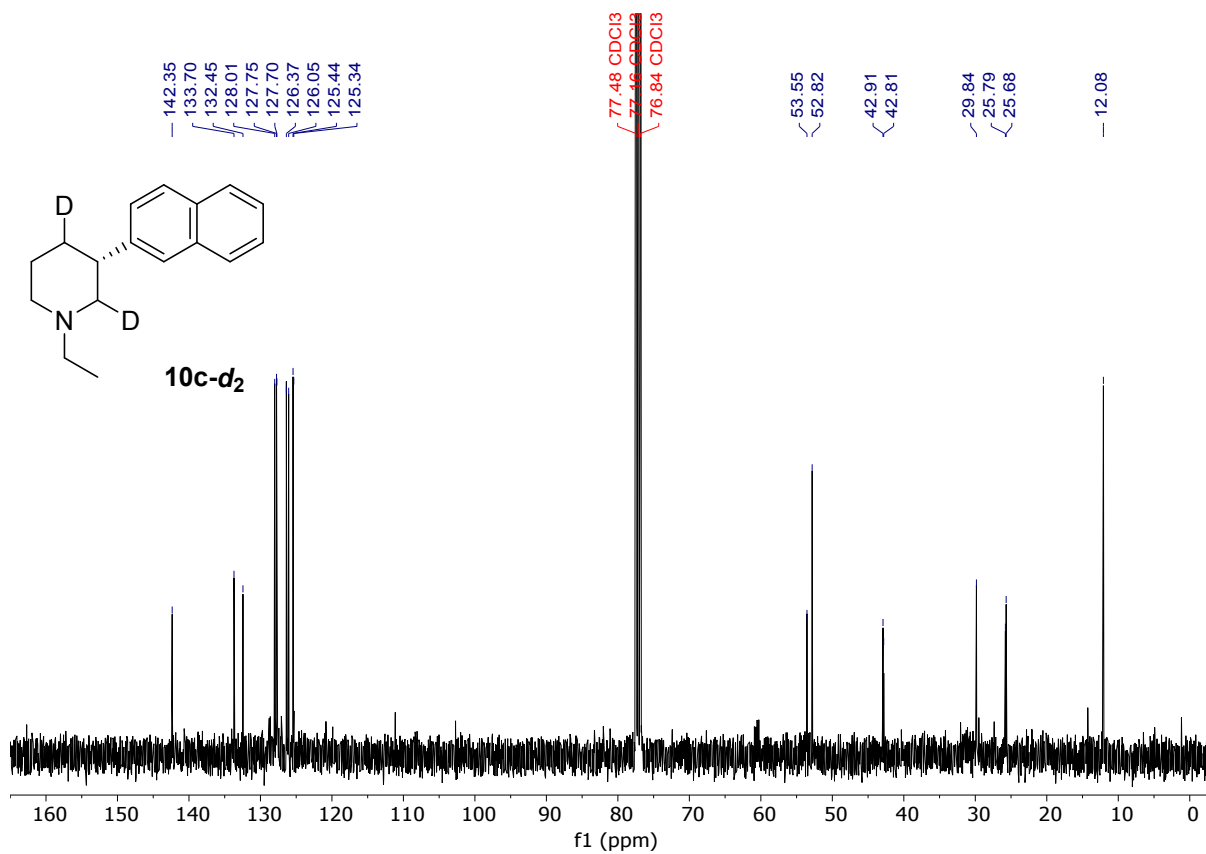

**<sup>1</sup>H & <sup>13</sup>C NMR spectra for (R)-1-methyl-3-phenylpiperidine (11c)**

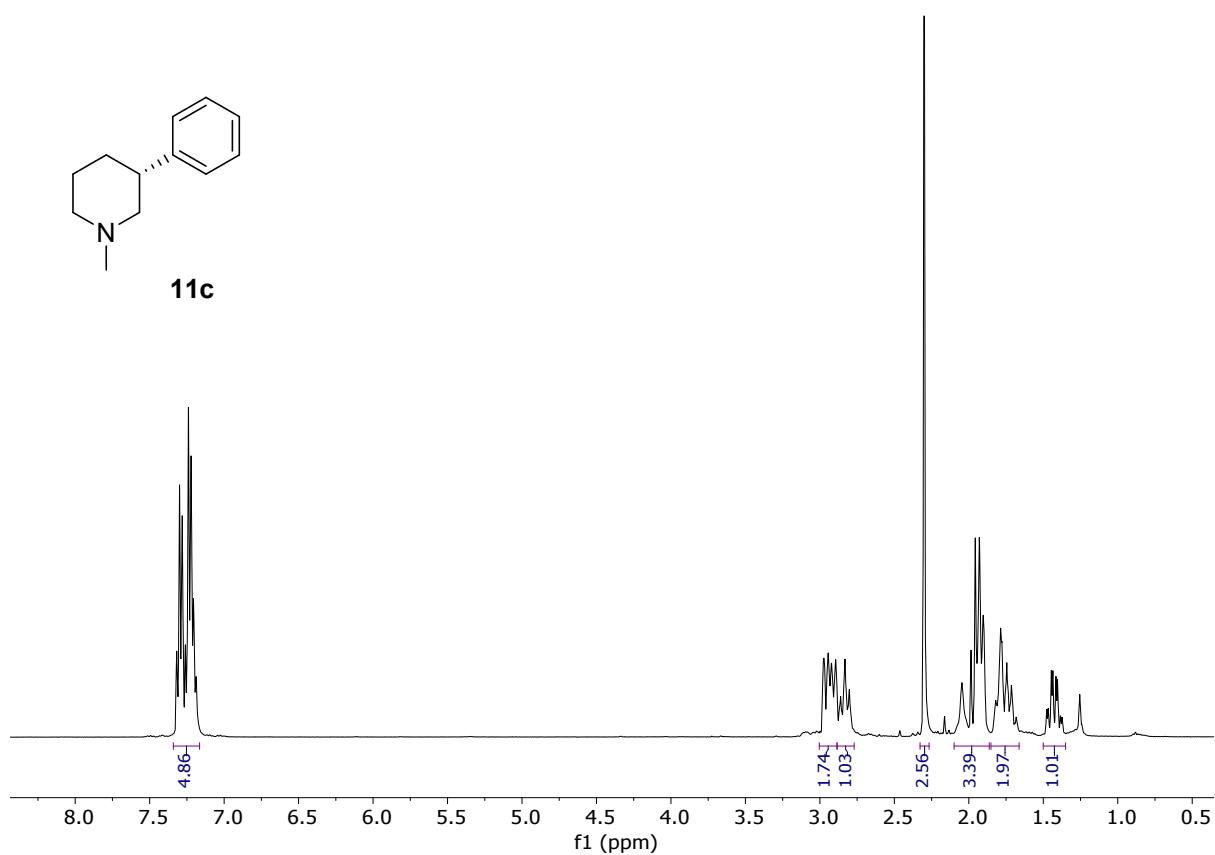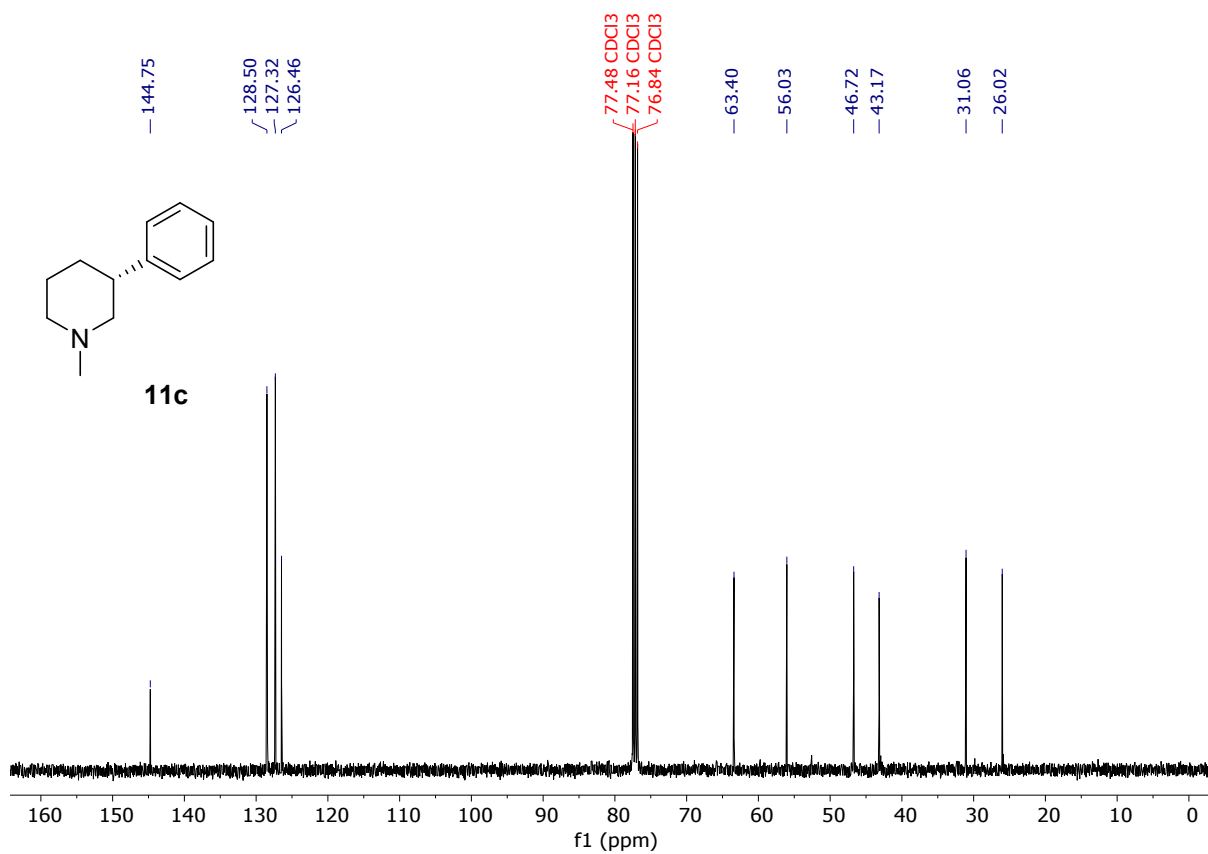

**<sup>1</sup>H & <sup>13</sup>C NMR spectra for (A)-3-phenyl-1-(prop-2-yn-1-yl)piperidine (12c)**

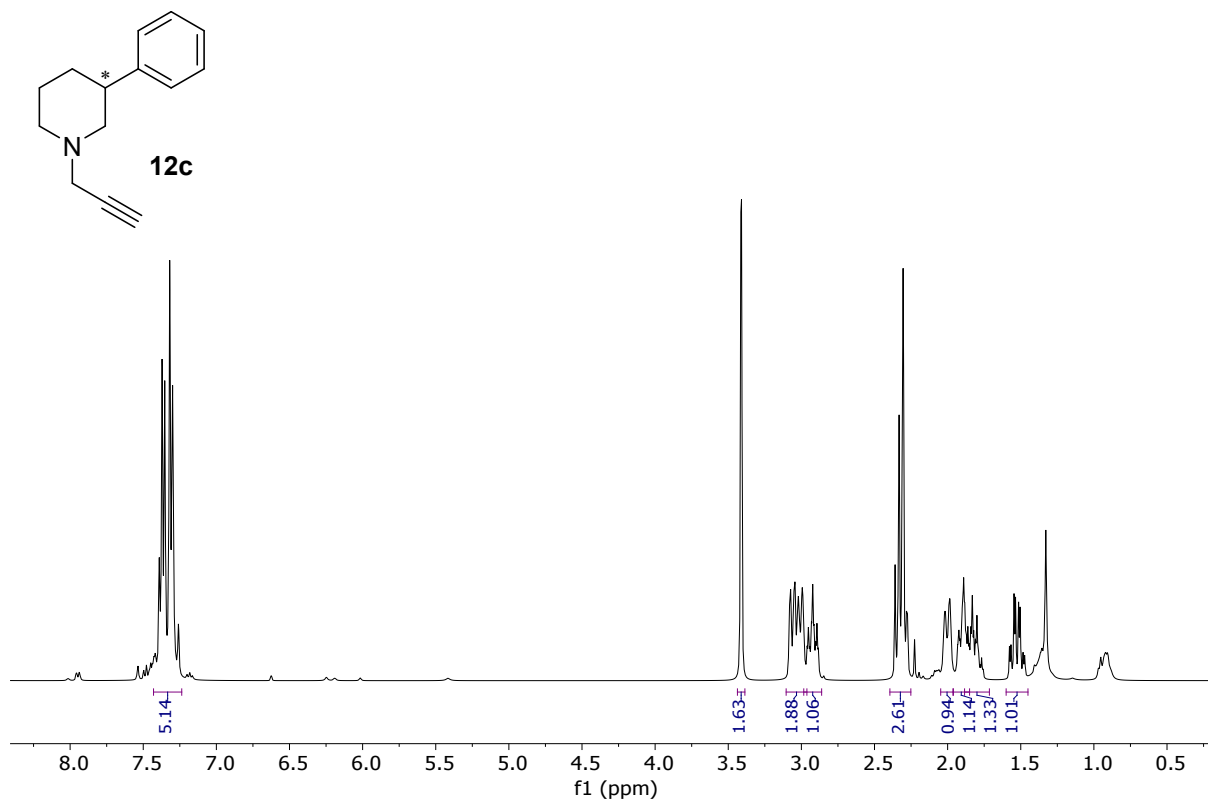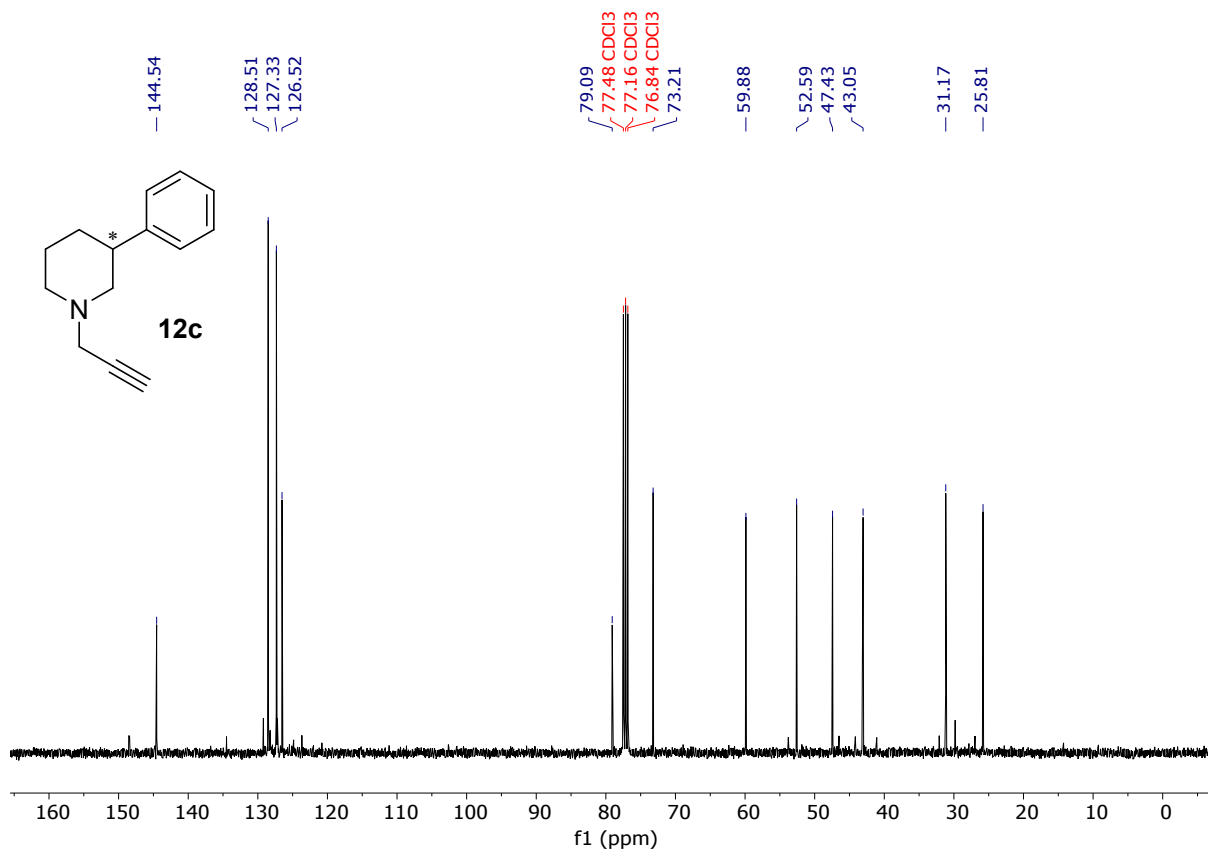

**<sup>1</sup>H & <sup>13</sup>C NMR spectra for (A)-1-ethyl-3-methylpiperidine (13c.HCl salt)**

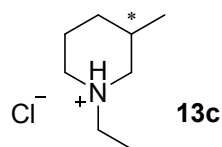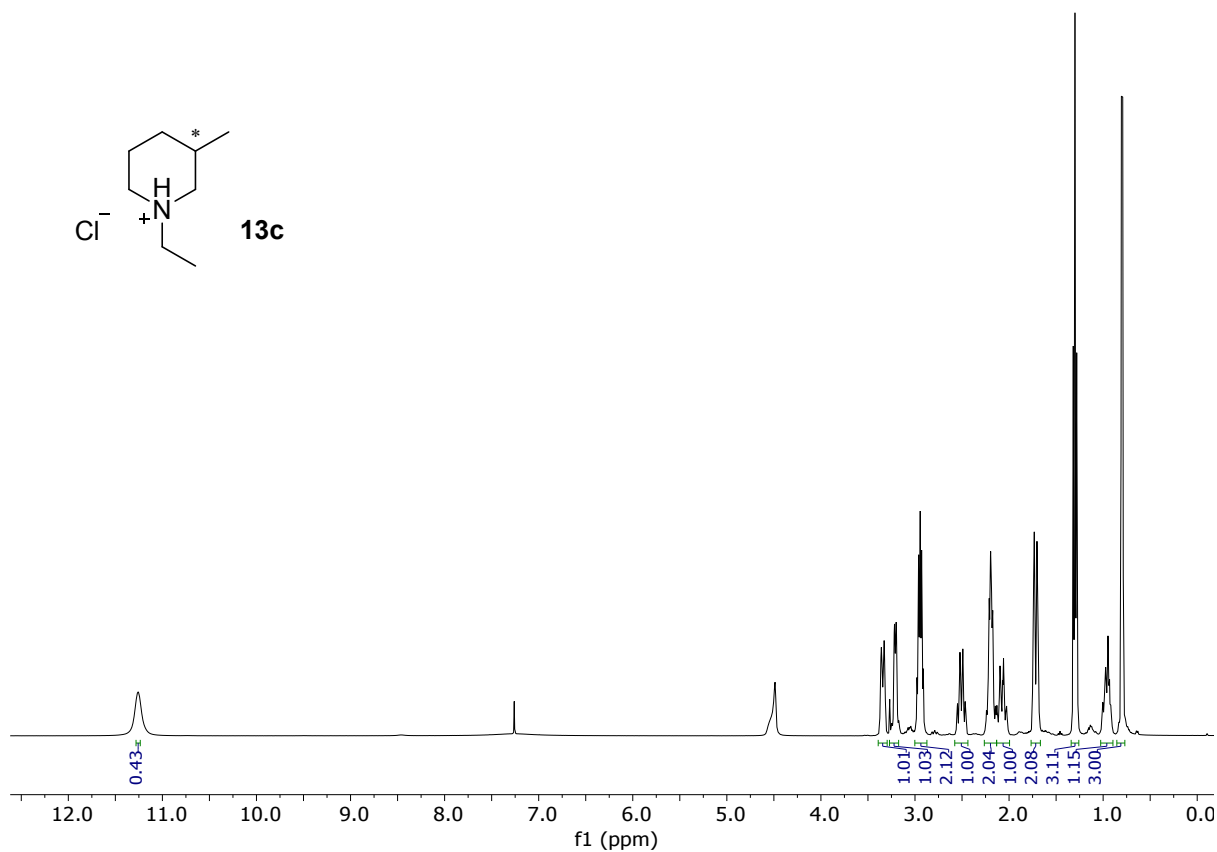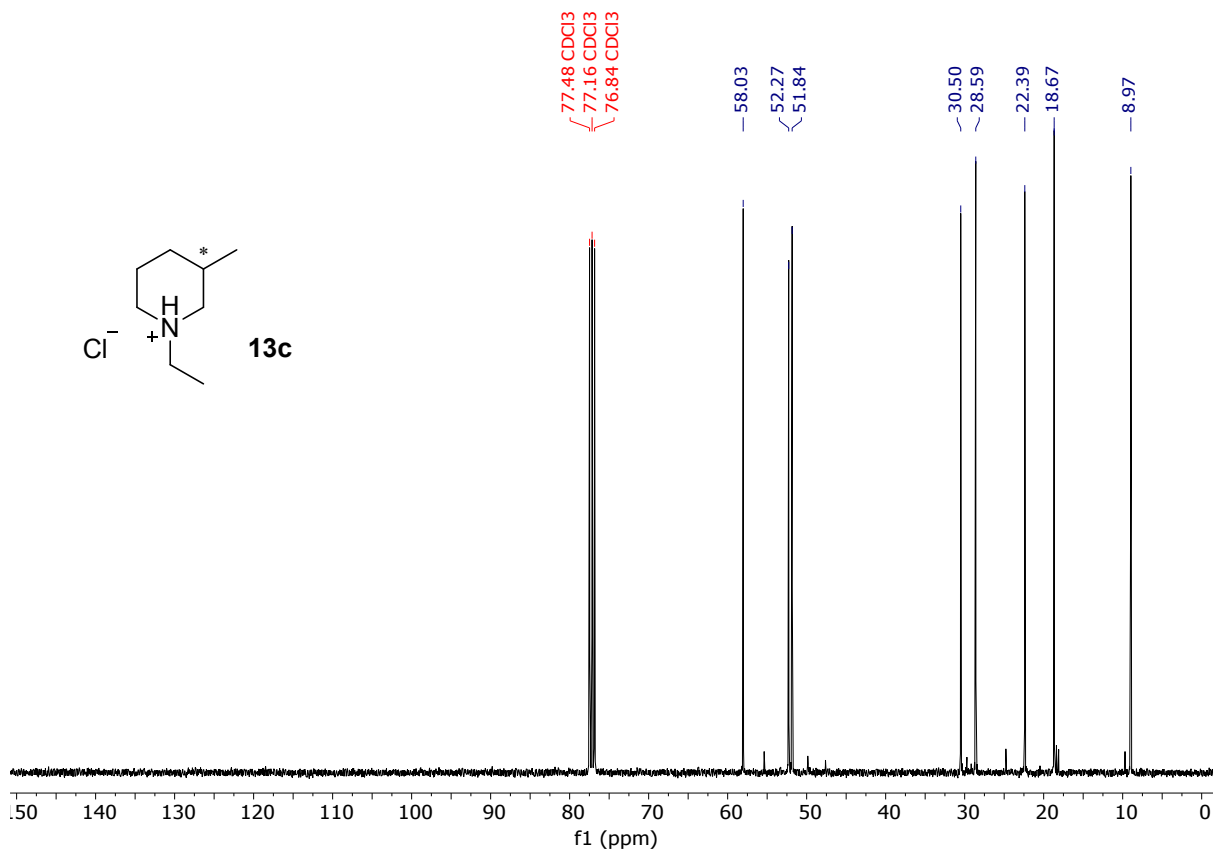

**<sup>1</sup>H & <sup>13</sup>C NMR spectra for 1-ethyl-4-methylpiperidine (15c.HCl salt)**

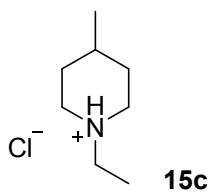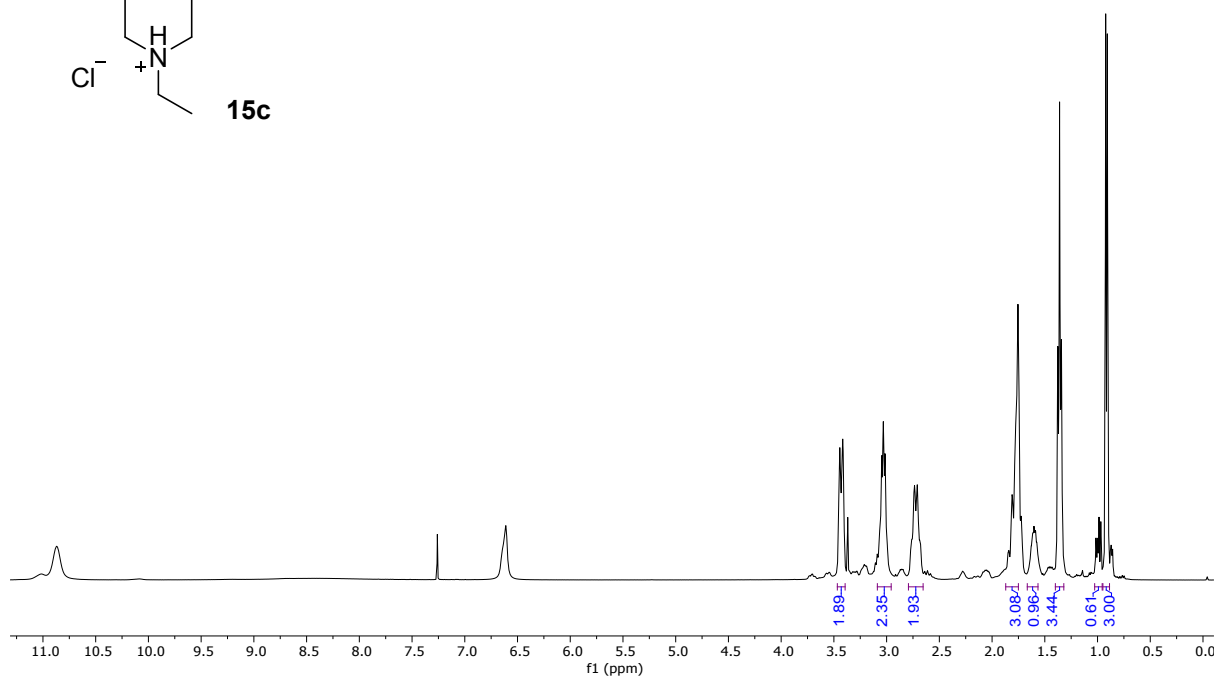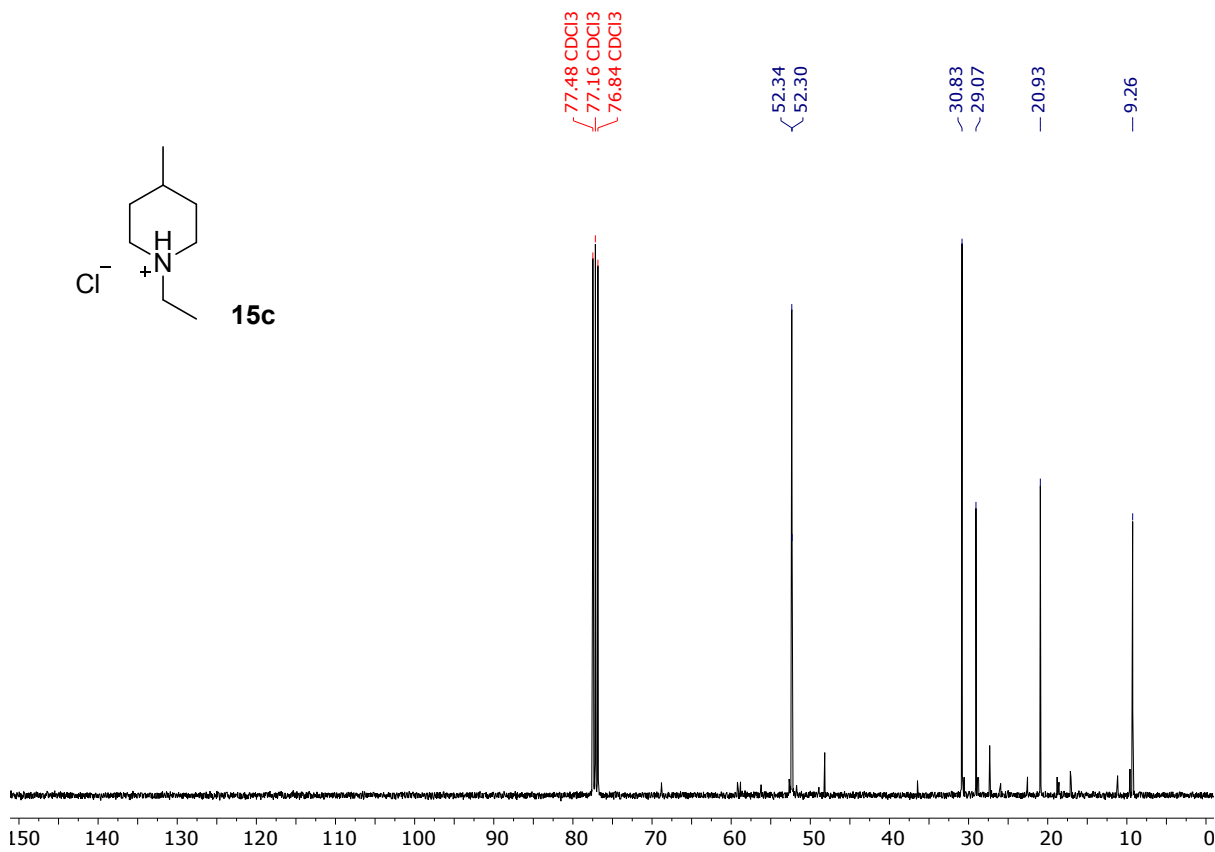

**<sup>1</sup>H & <sup>13</sup>C NMR spectra for 1-ethyl-4-phenylpiperidine (16c)**

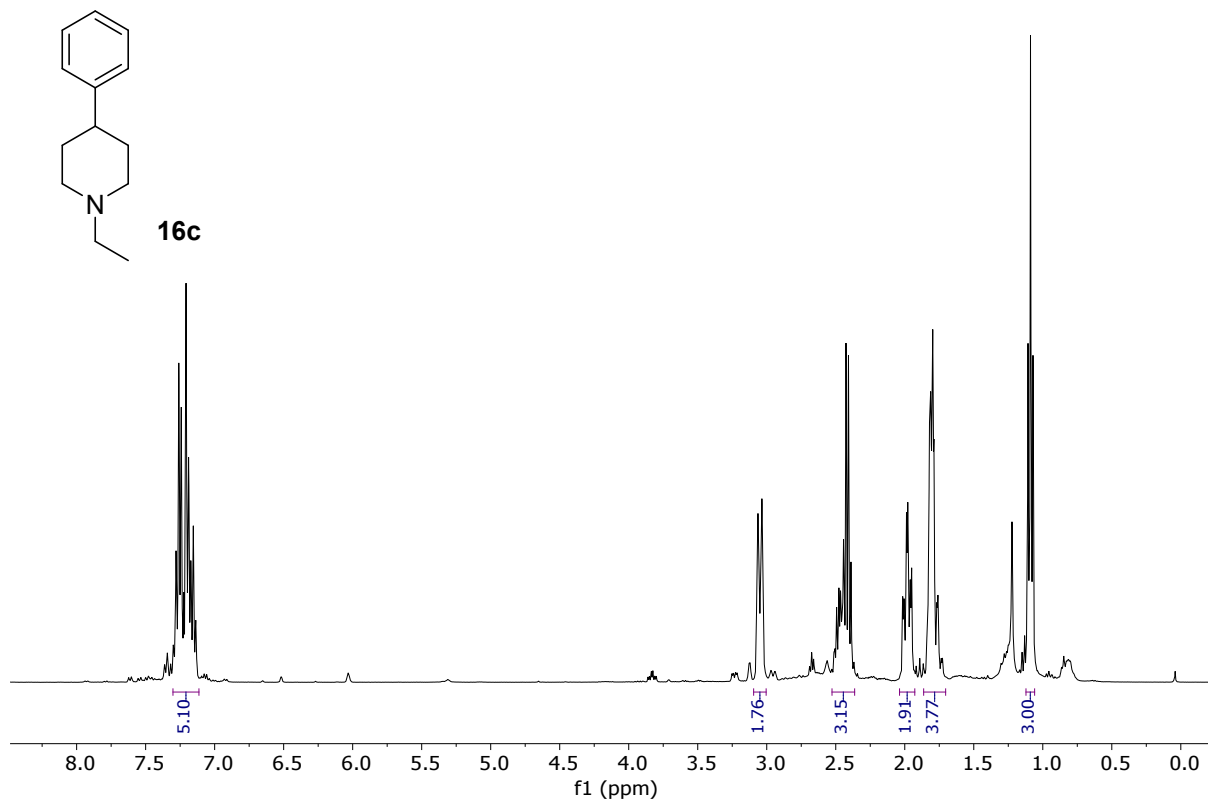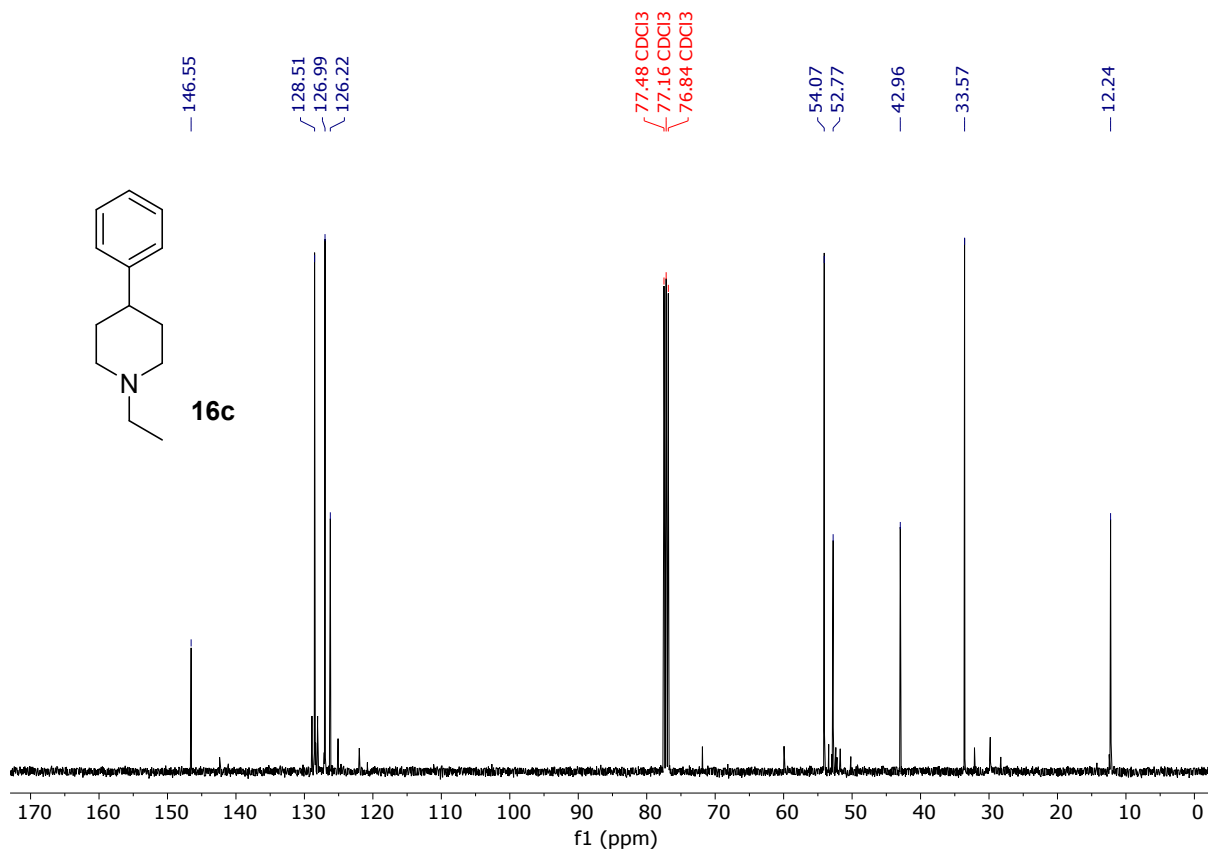



**<sup>1</sup>H & <sup>13</sup>C NMR spectra for 1-ethyl-3,4-dimethylpiperidine (17c)**

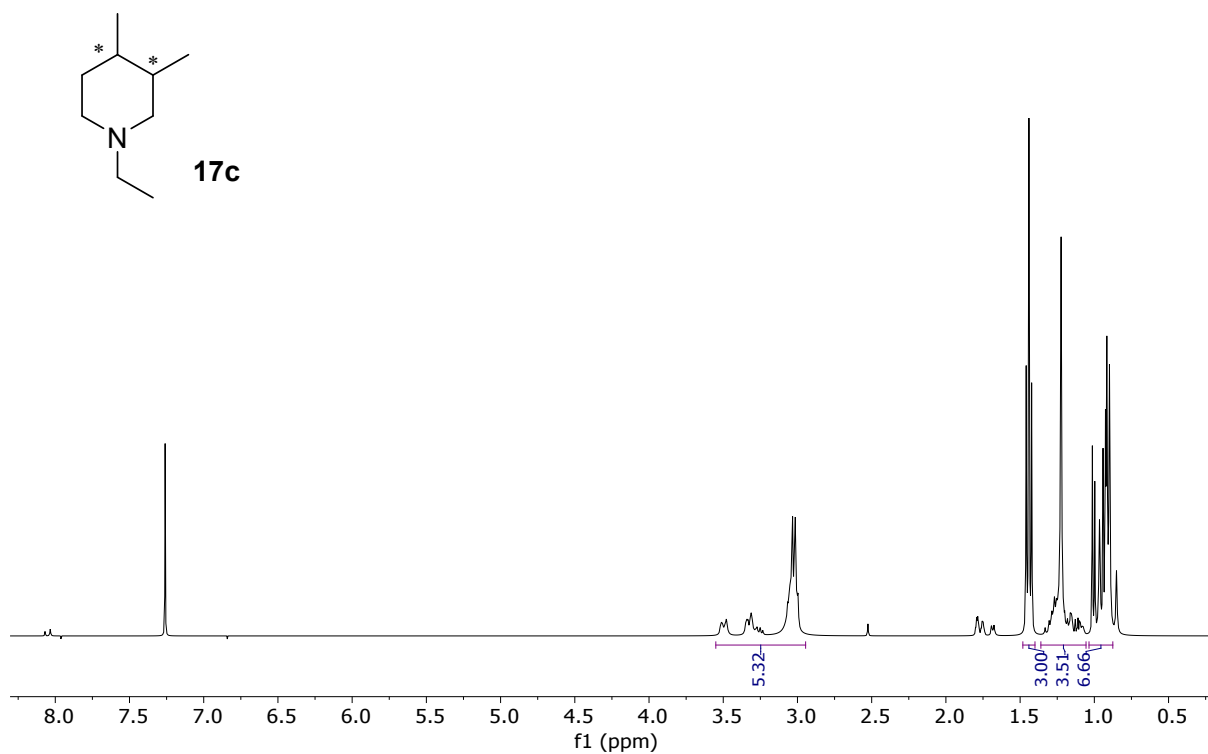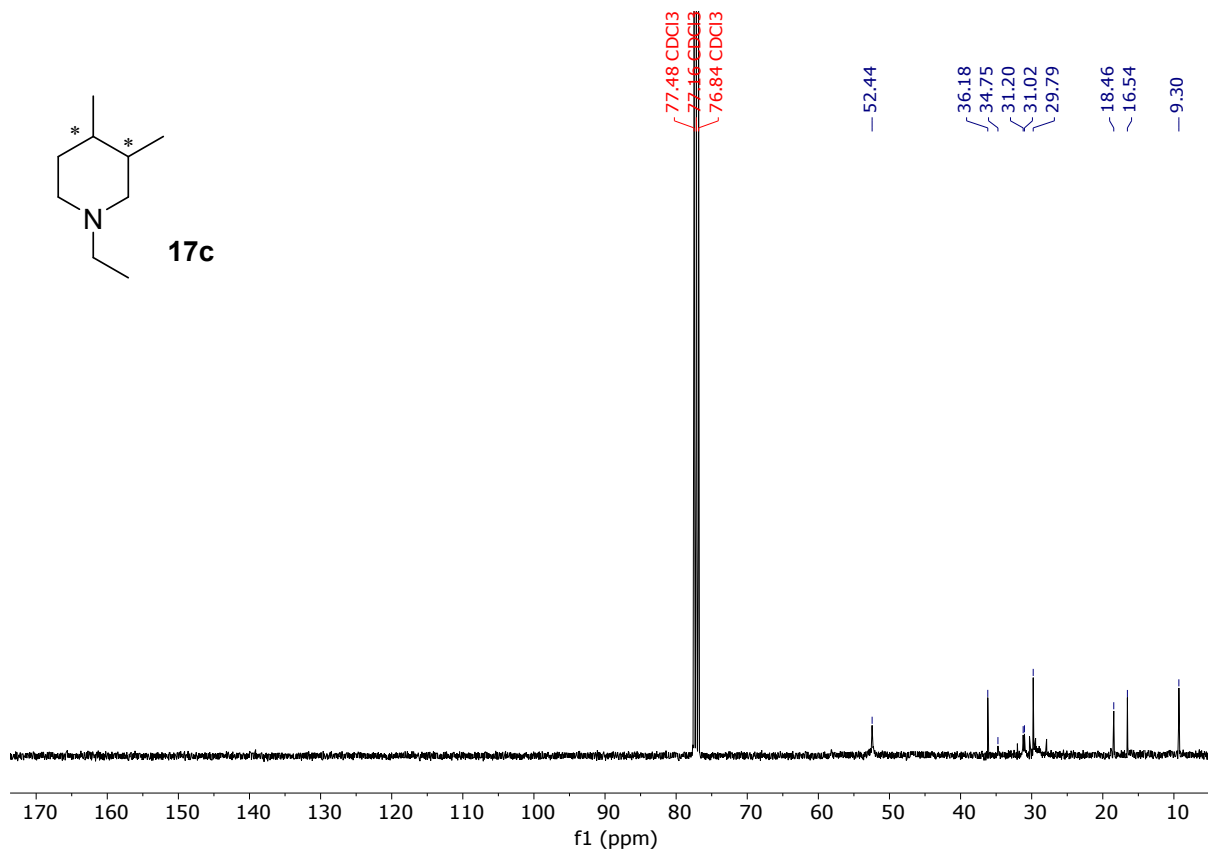

**<sup>1</sup>H & <sup>13</sup>C NMR spectra for 2-ethyldecahydroisoquinoline (18c)**

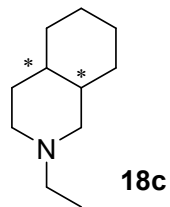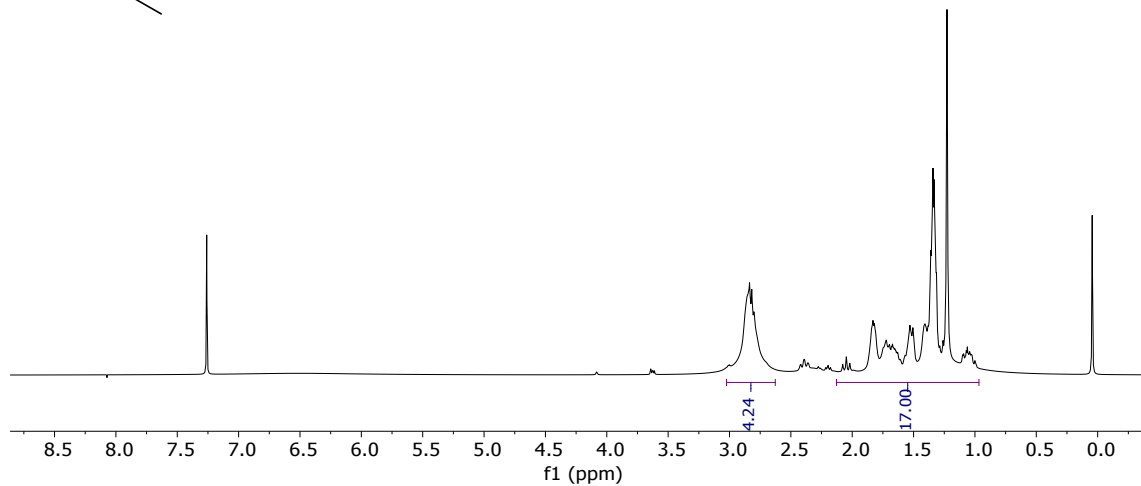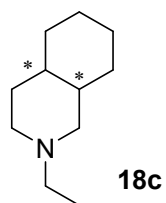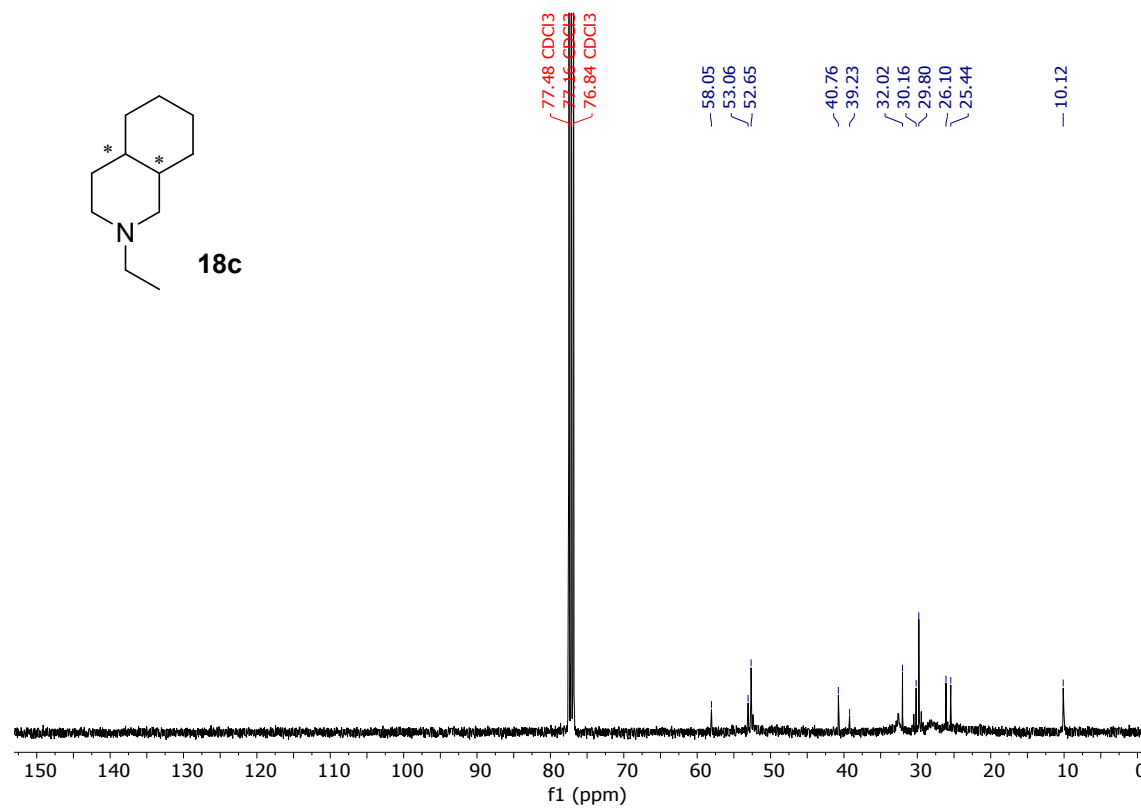

**<sup>1</sup>H & <sup>13</sup>C NMR spectra for 1-ethyl-4-methyl-3-phenylpiperidine (19c)**

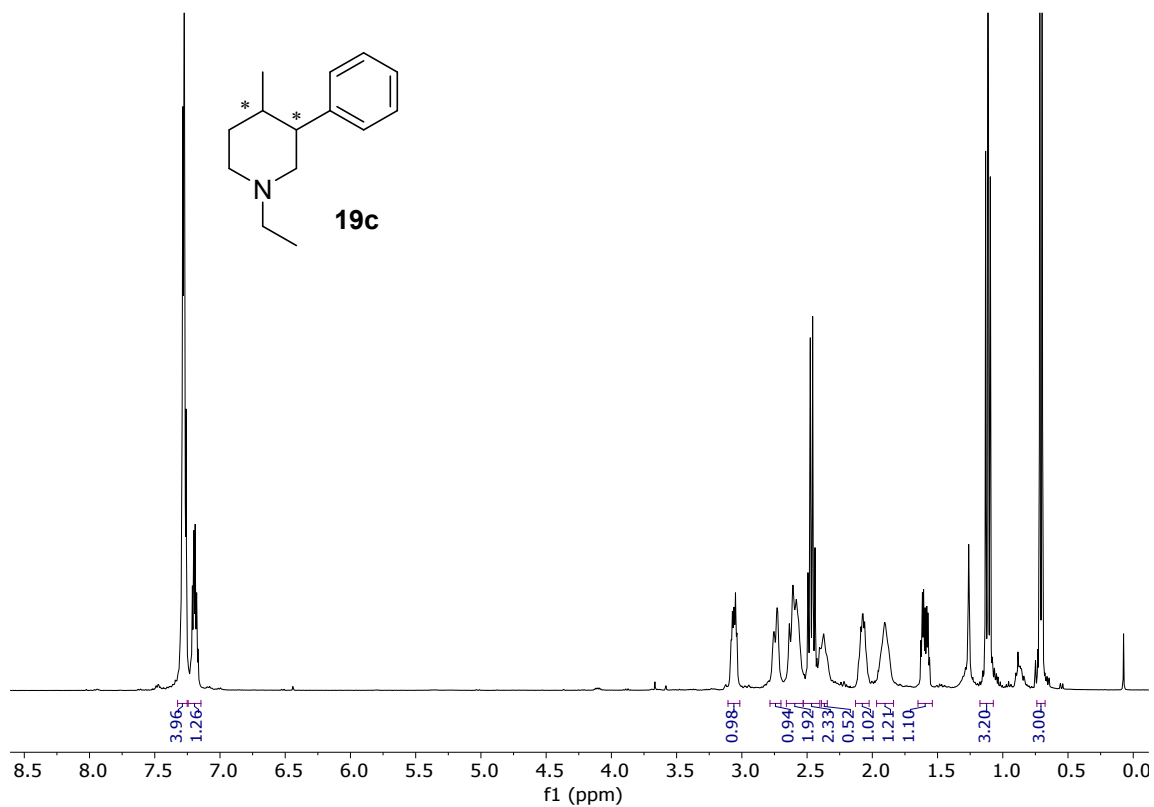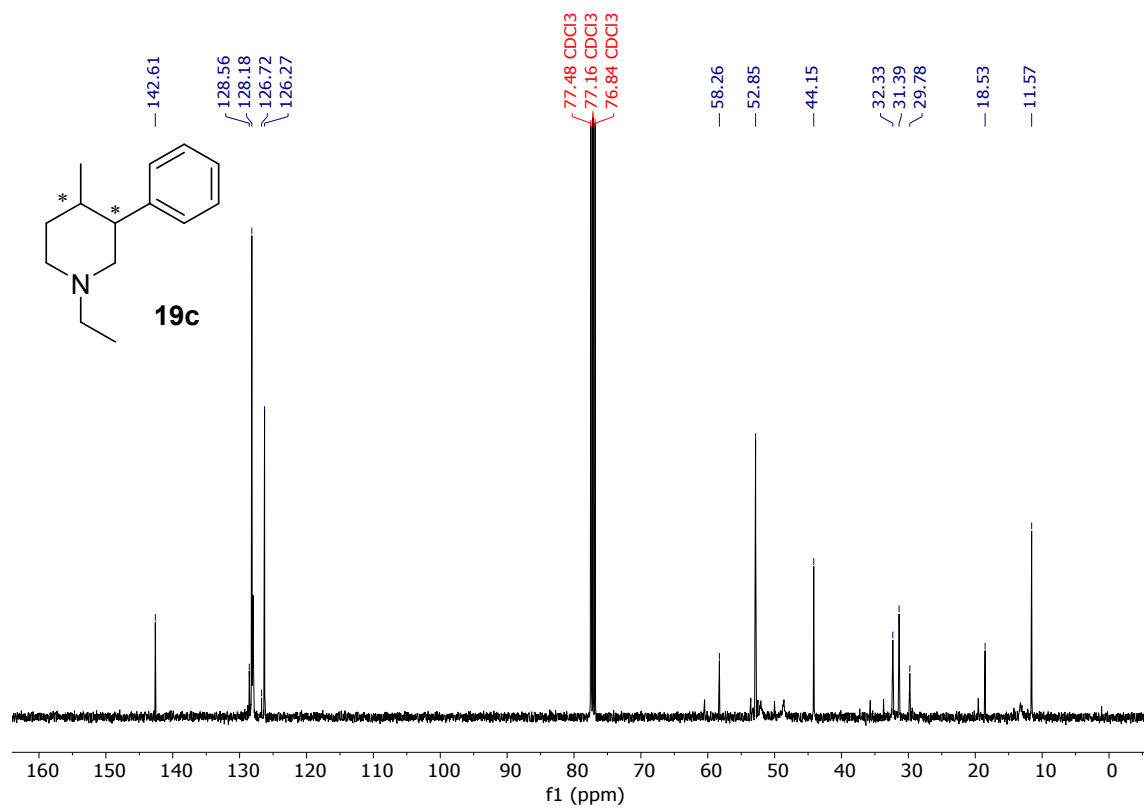

**<sup>1</sup>H & <sup>13</sup>C NMR spectra for 1-allyl-4-methyl-3-phenylpiperidine (20c)**

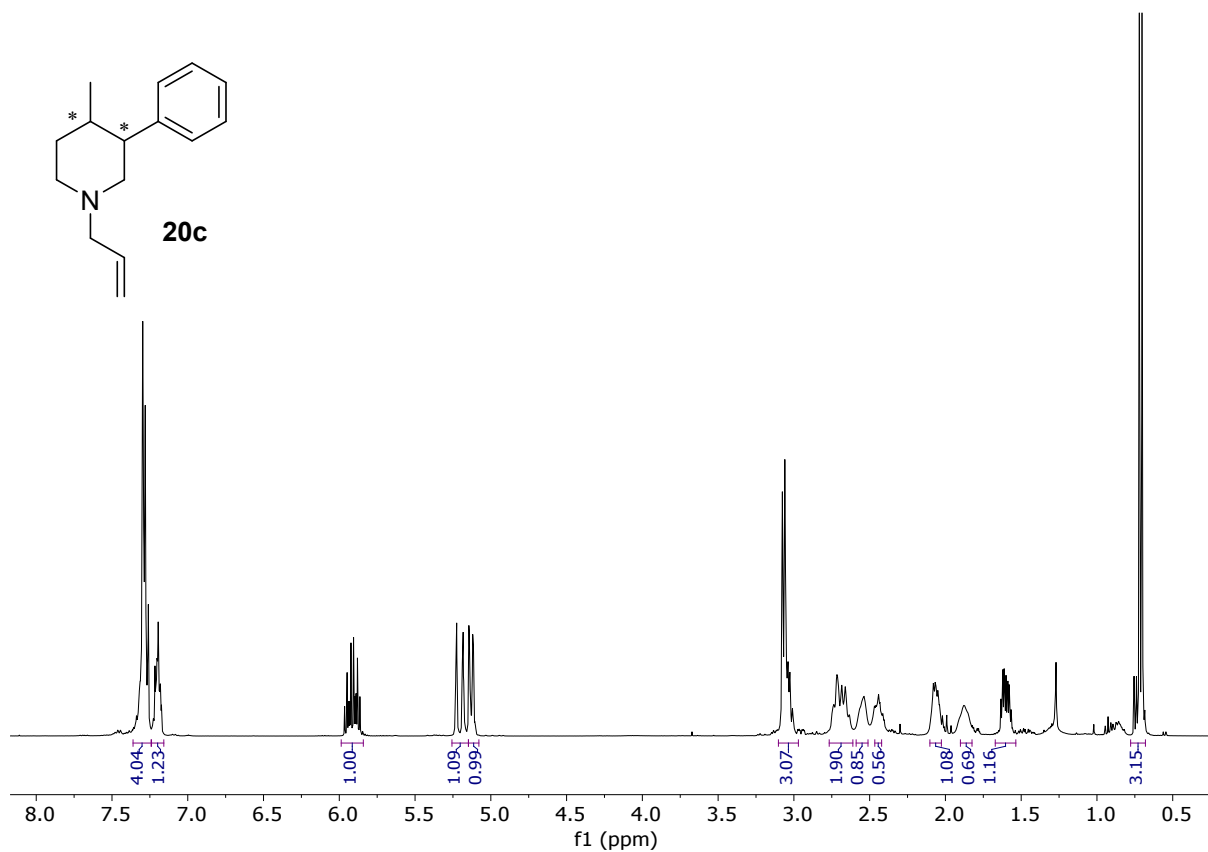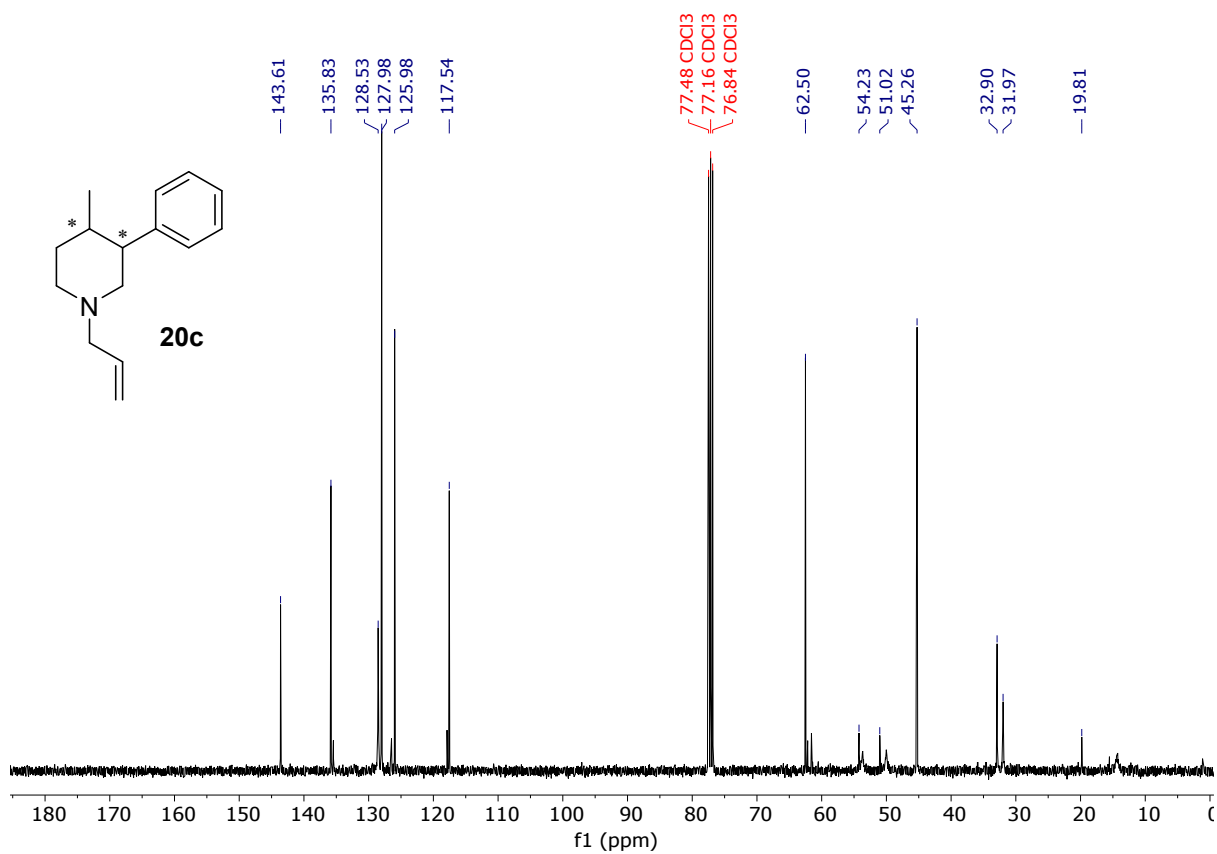

**<sup>1</sup>H & <sup>13</sup>C NMR spectra for 3-(3-methoxyphenyl)pyridine**

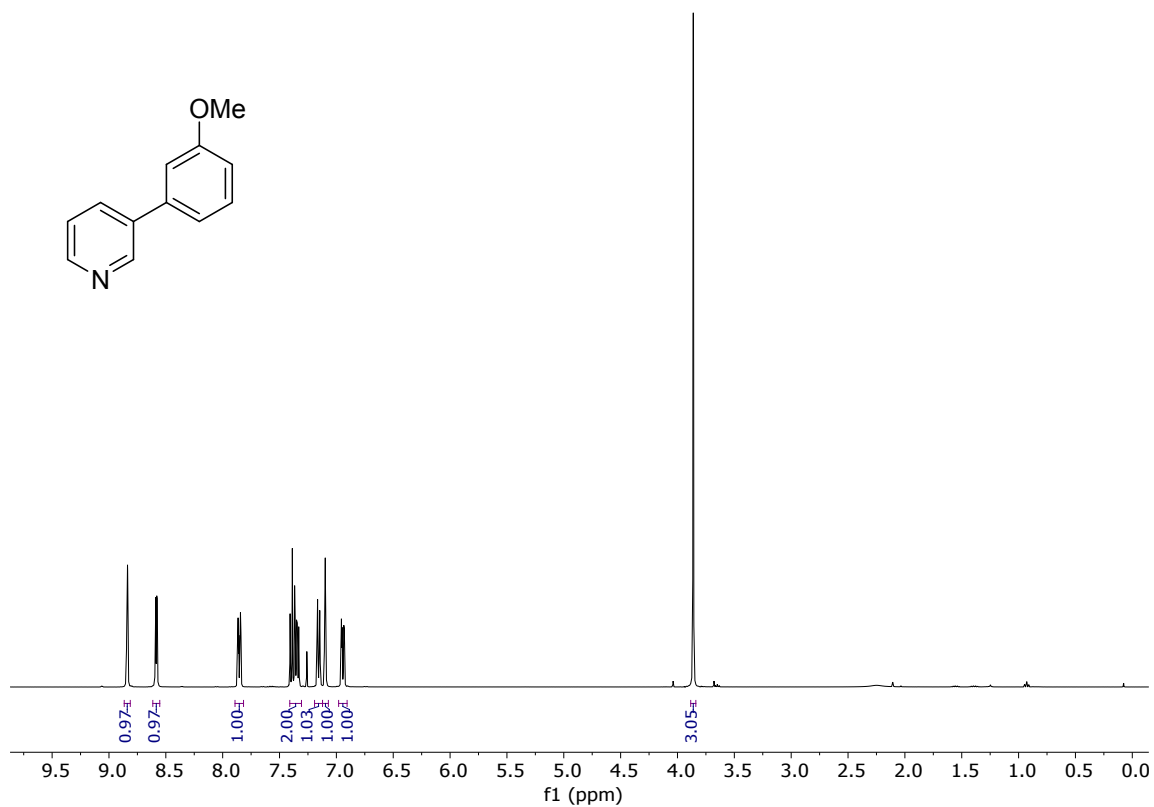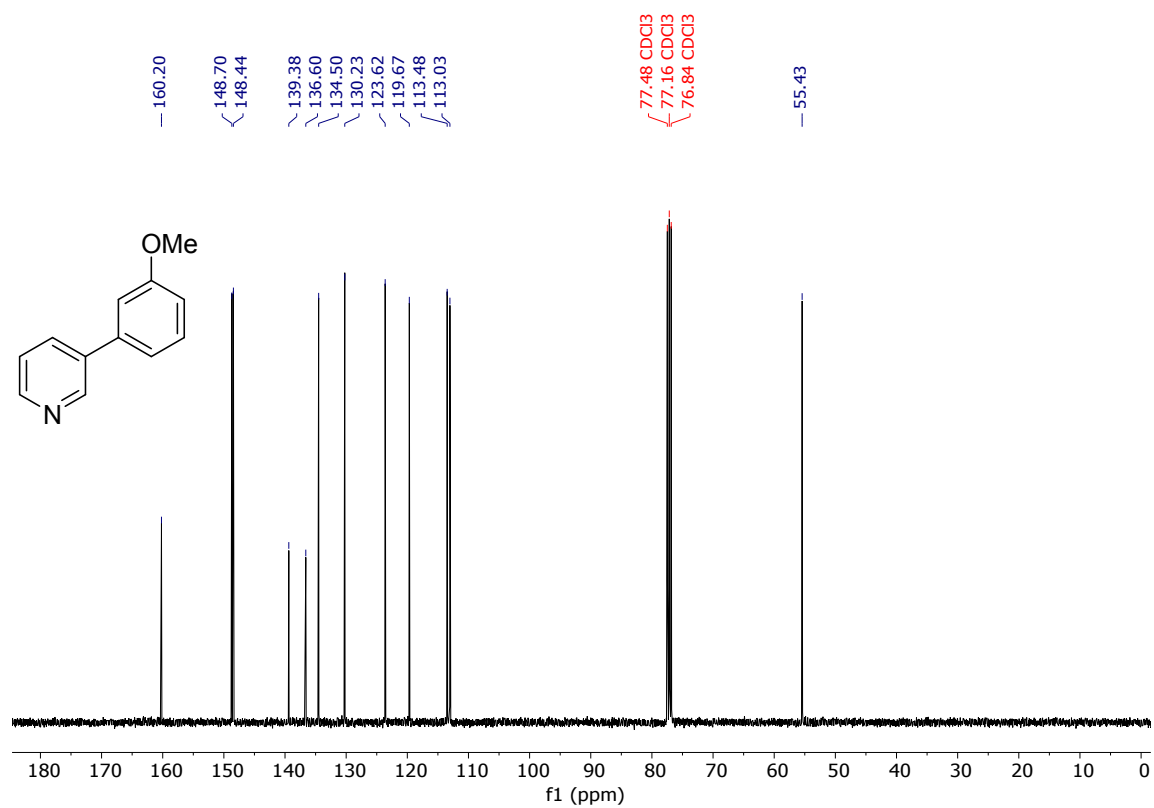

# <sup>1</sup>H & <sup>13</sup>C NMR spectra for 3-(3-(methylsulfonyl)phenyl)pyridine

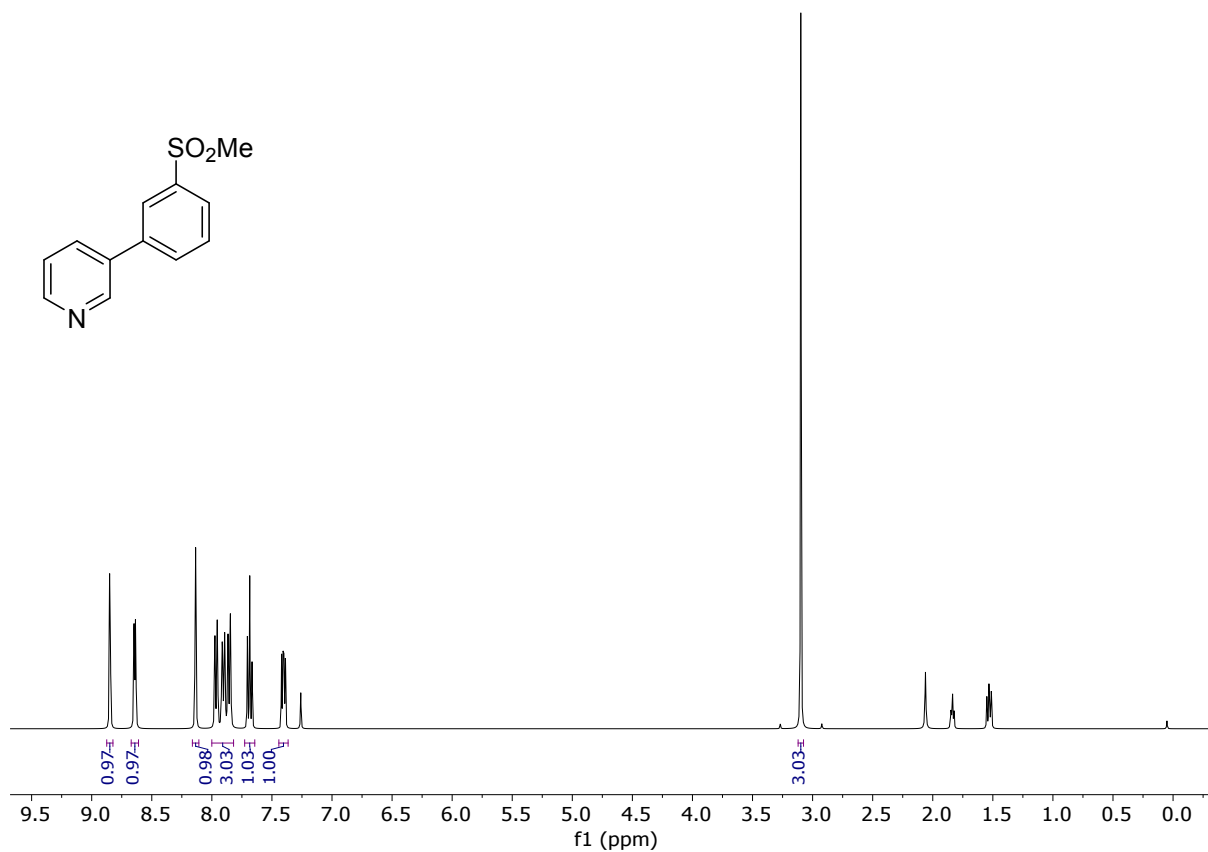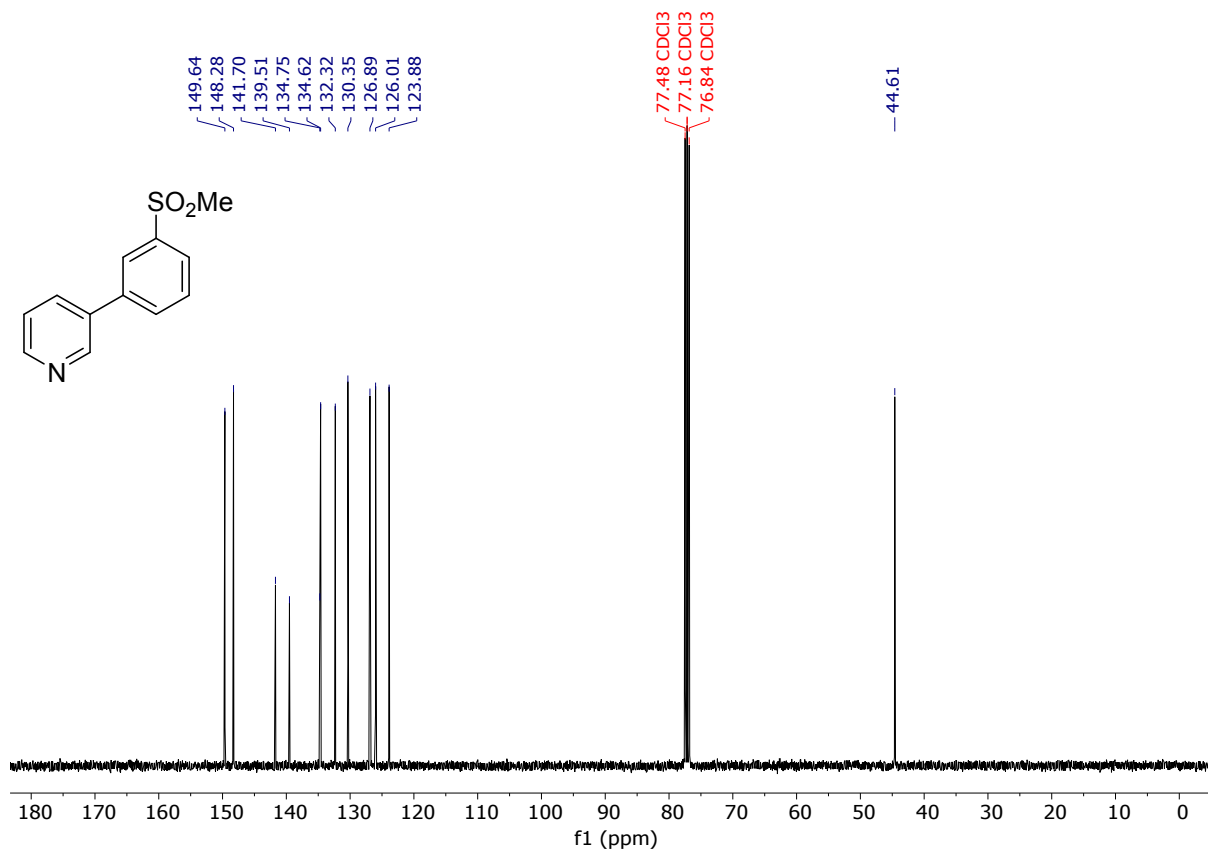

**<sup>1</sup>H & <sup>13</sup>C NMR spectra for 3-(4-fluorophenyl)pyridine**

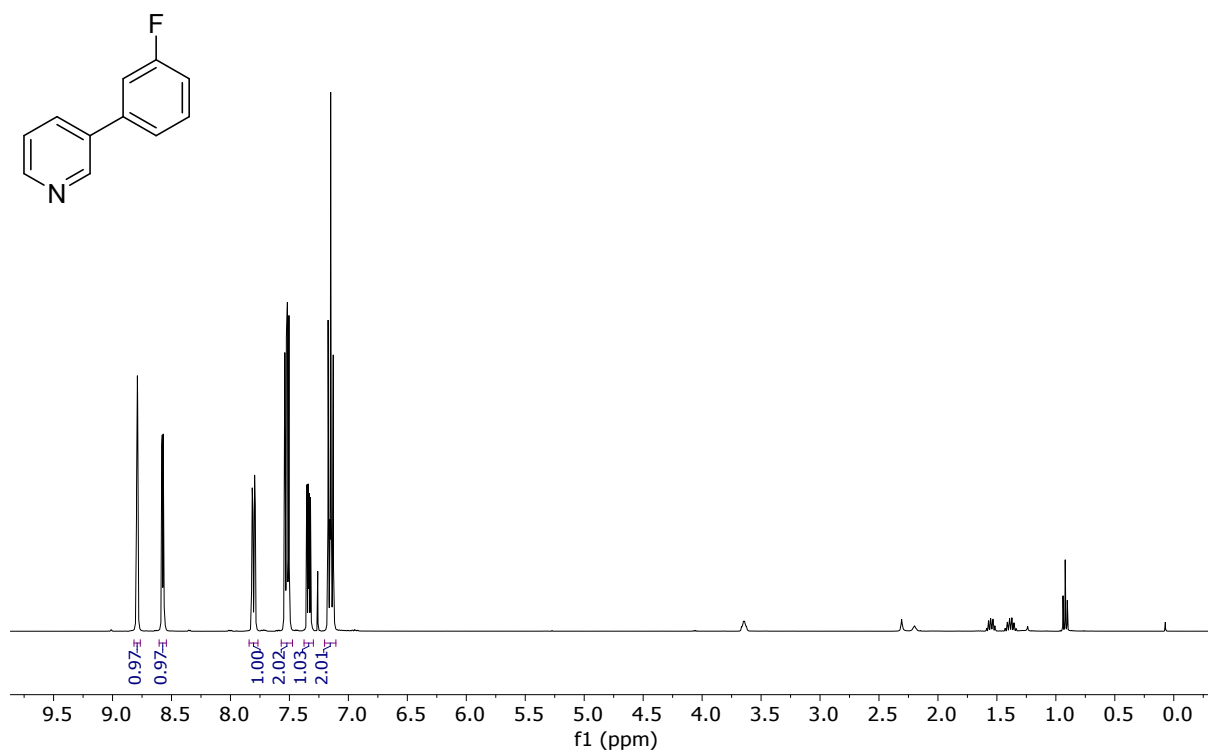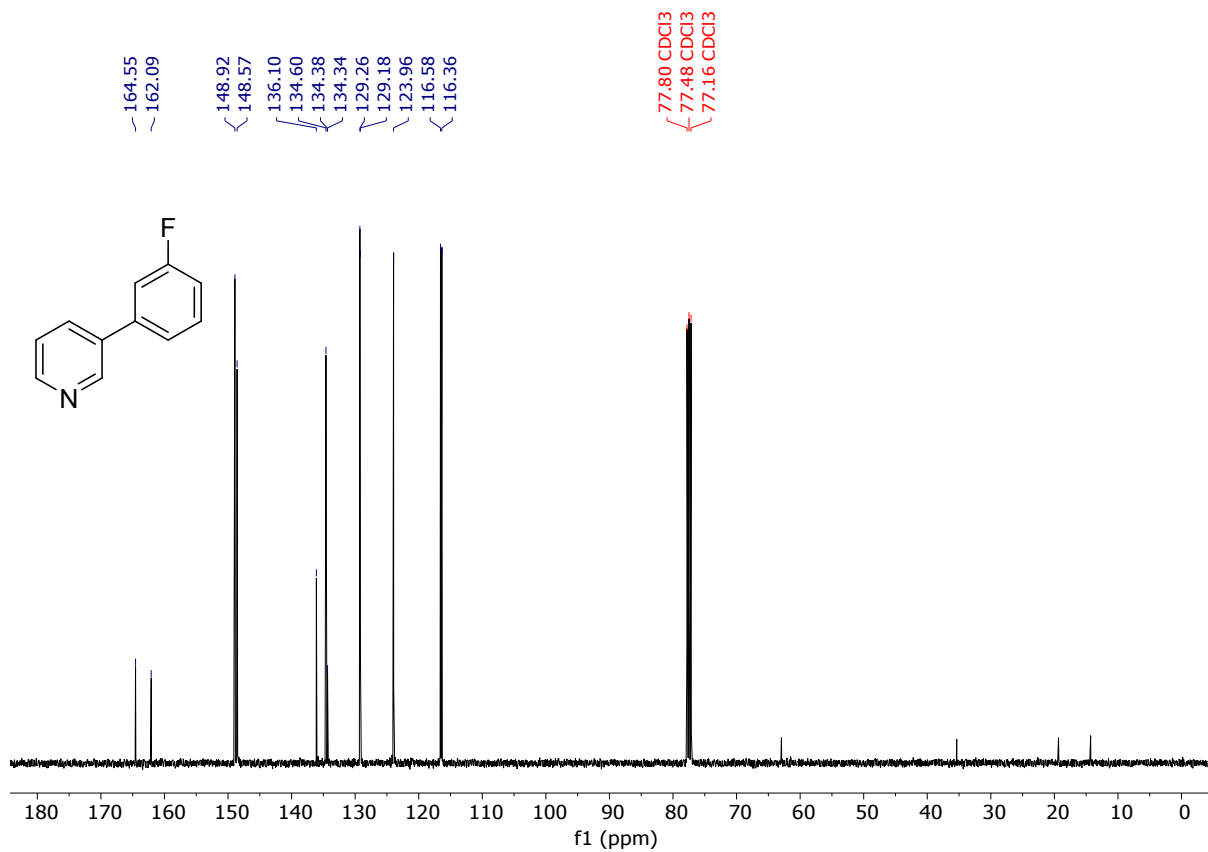

**<sup>1</sup>H & <sup>13</sup>C NMR spectra for 3-(naphthalen-2-yl)pyridine**

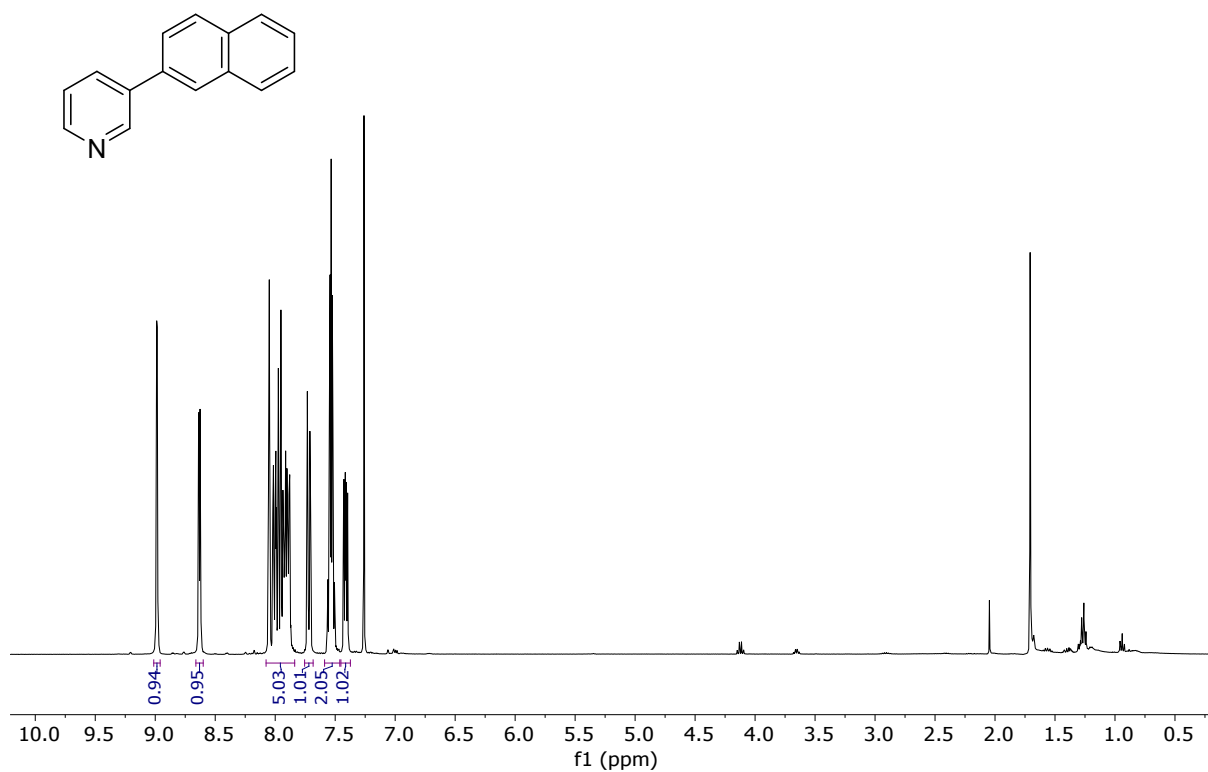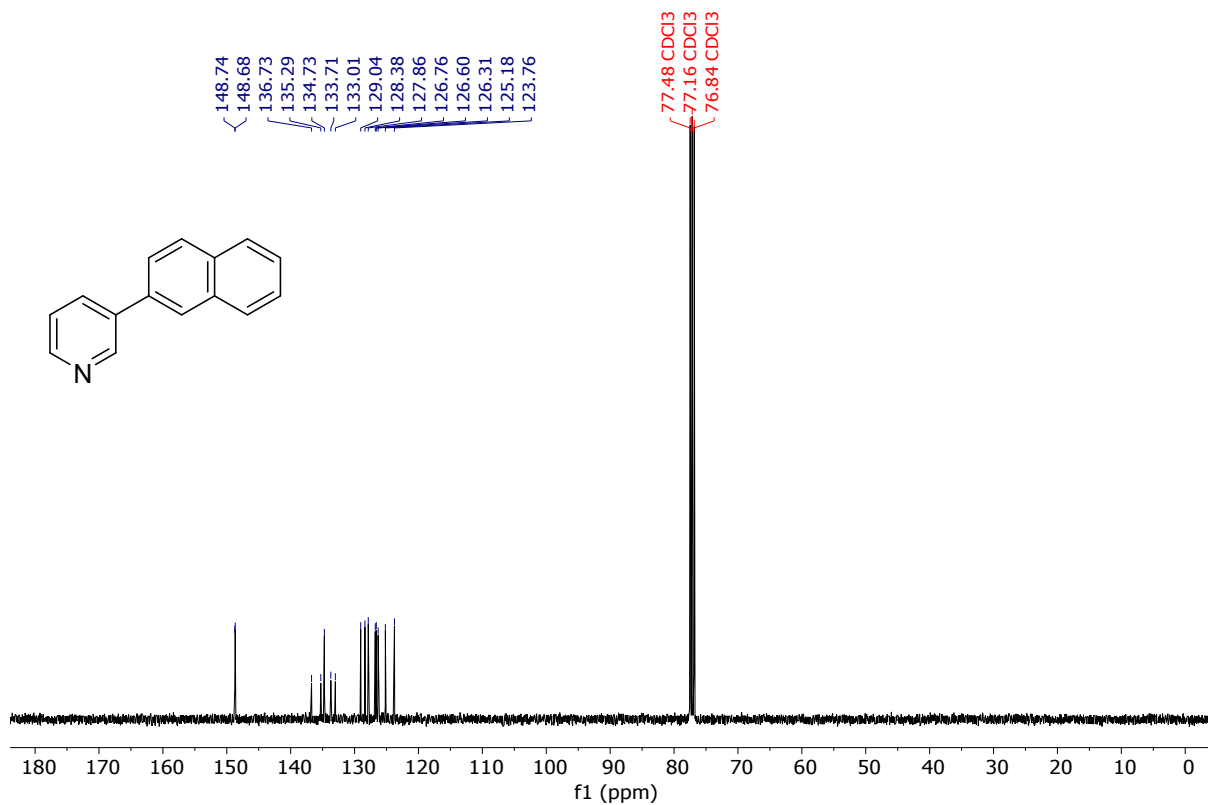

**<sup>1</sup>H & <sup>13</sup>C NMR spectra for 3-(furan-2-yl)pyridine**



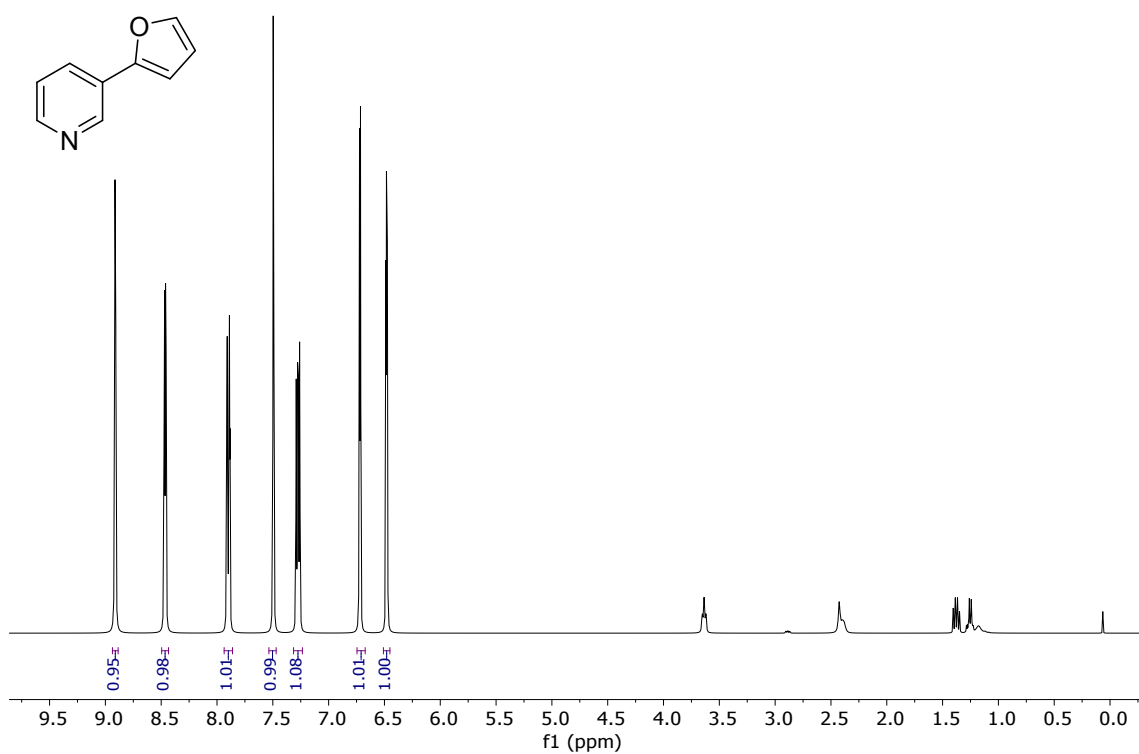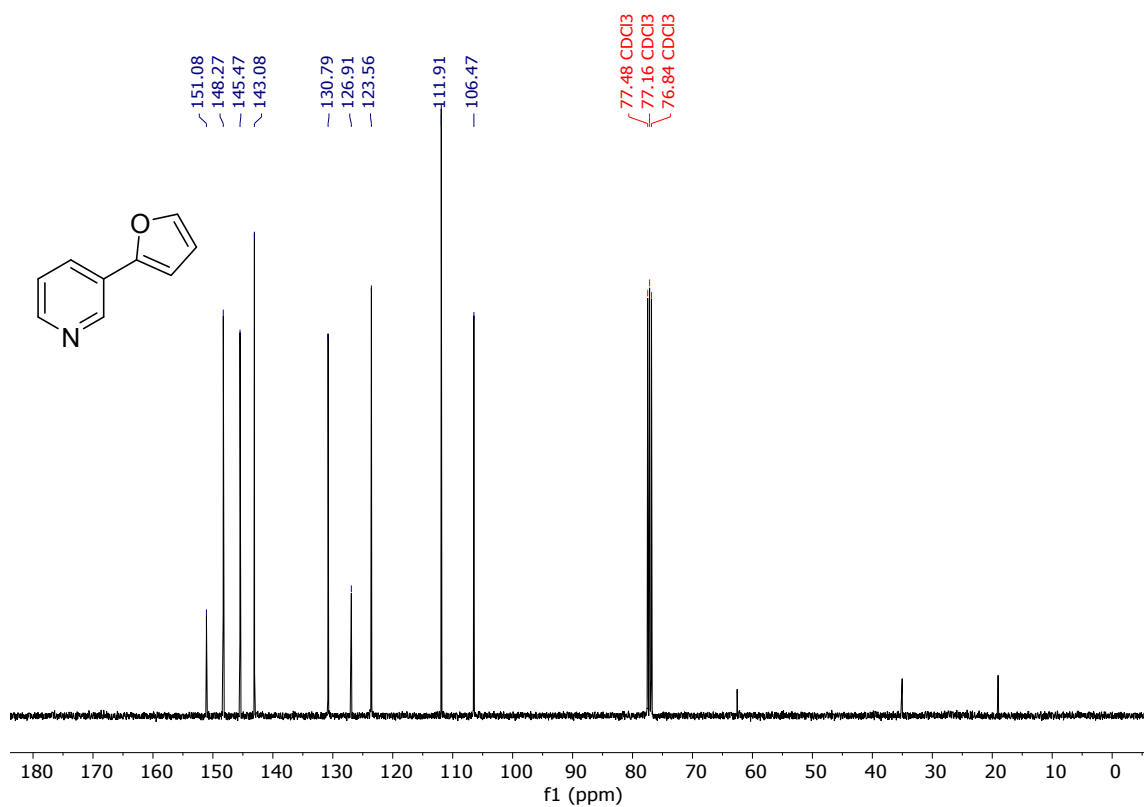

<sup>1</sup>H & <sup>13</sup>C NMR spectra for 3-methyl-4-phenylpyridine (Crude)

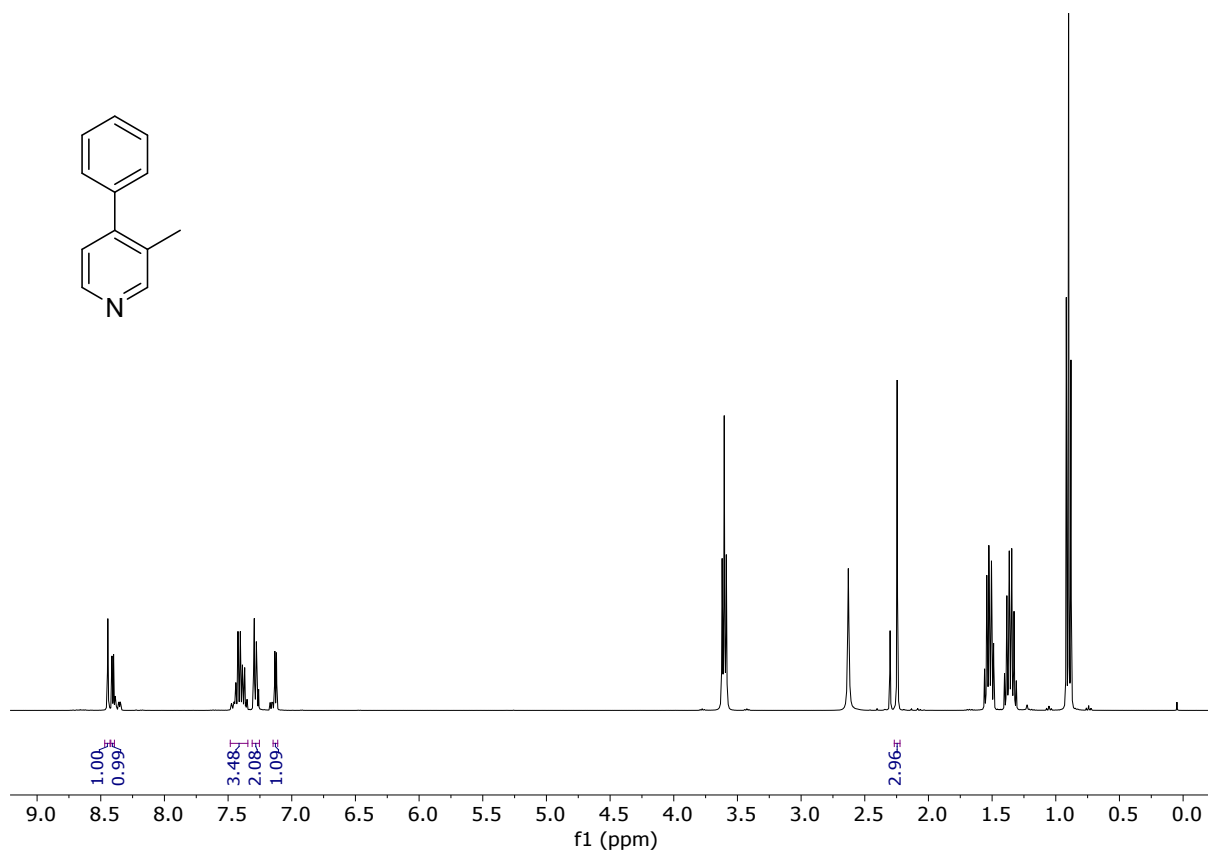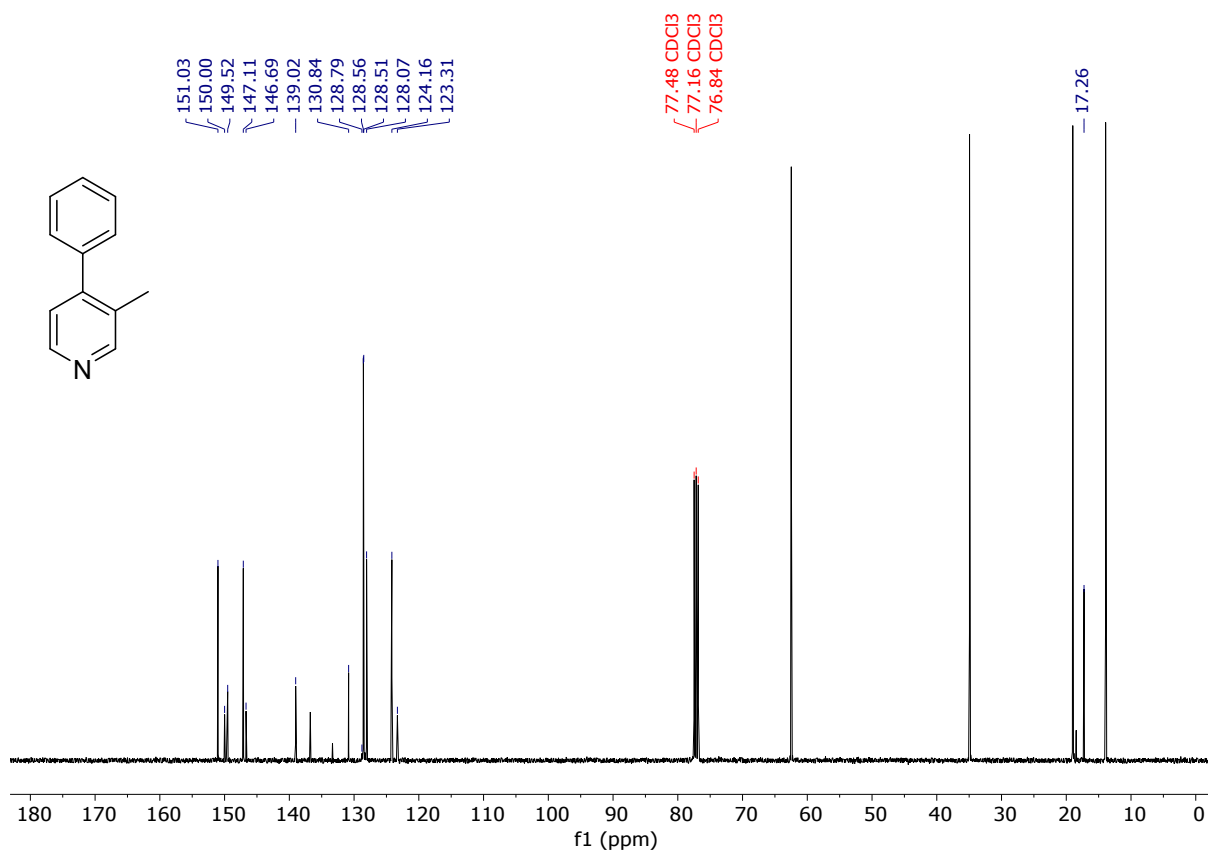

<sup>1</sup>H & <sup>13</sup>C NMR spectra for *N*-(4-(pyridin-3-yl)phenyl)acetamide (Crude)

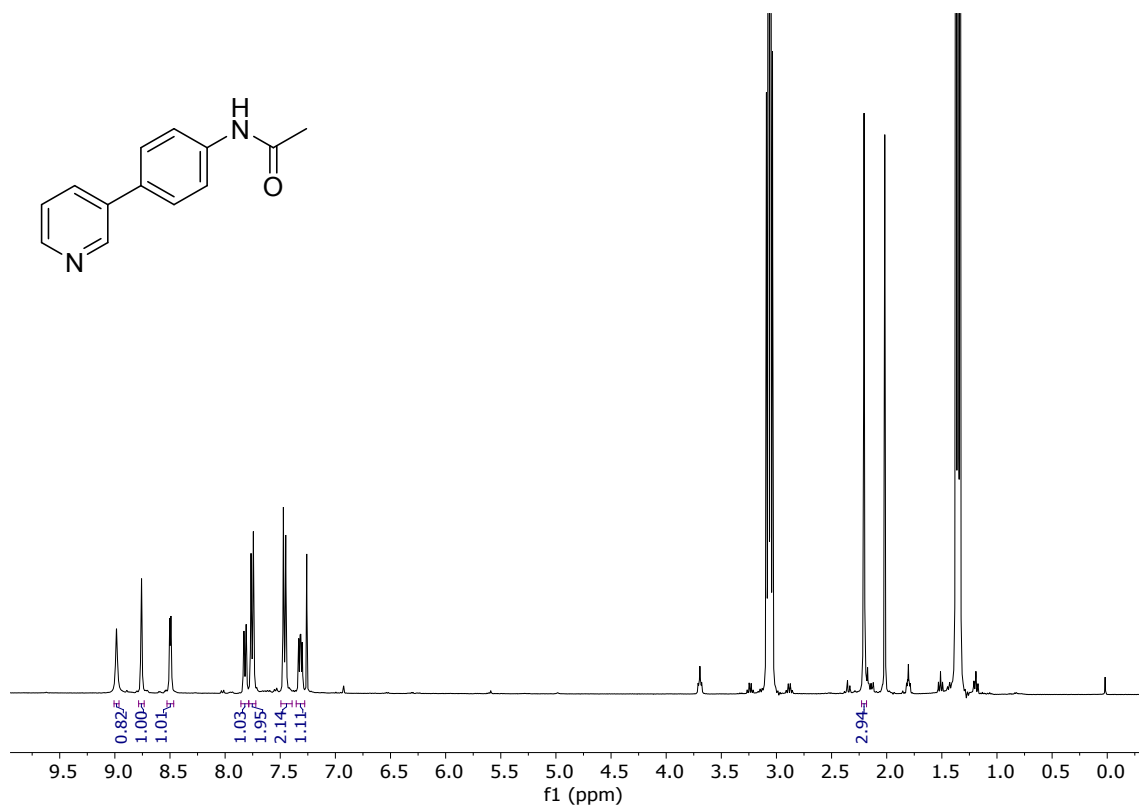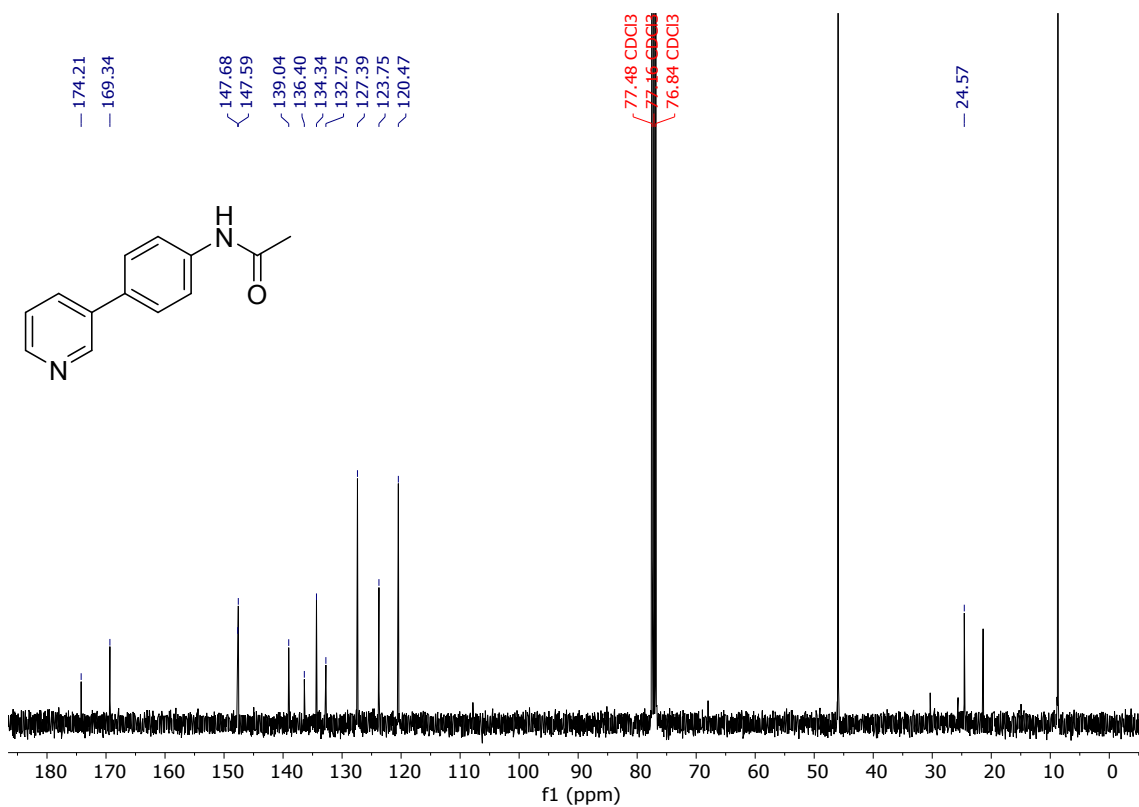

**<sup>1</sup>H & <sup>13</sup>C NMR spectra for 3-(3-methoxyphenyl)-1-propylpyridinium iodide (Crude-1a)**

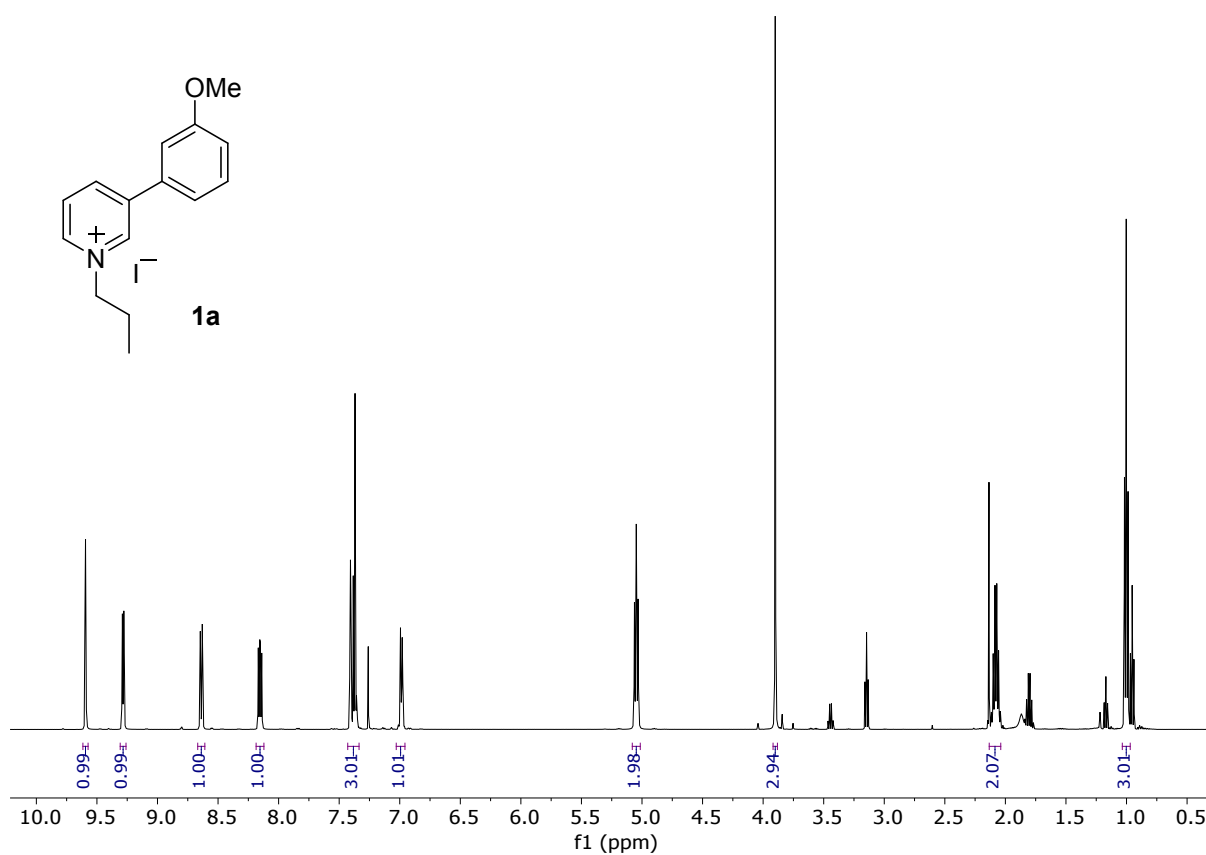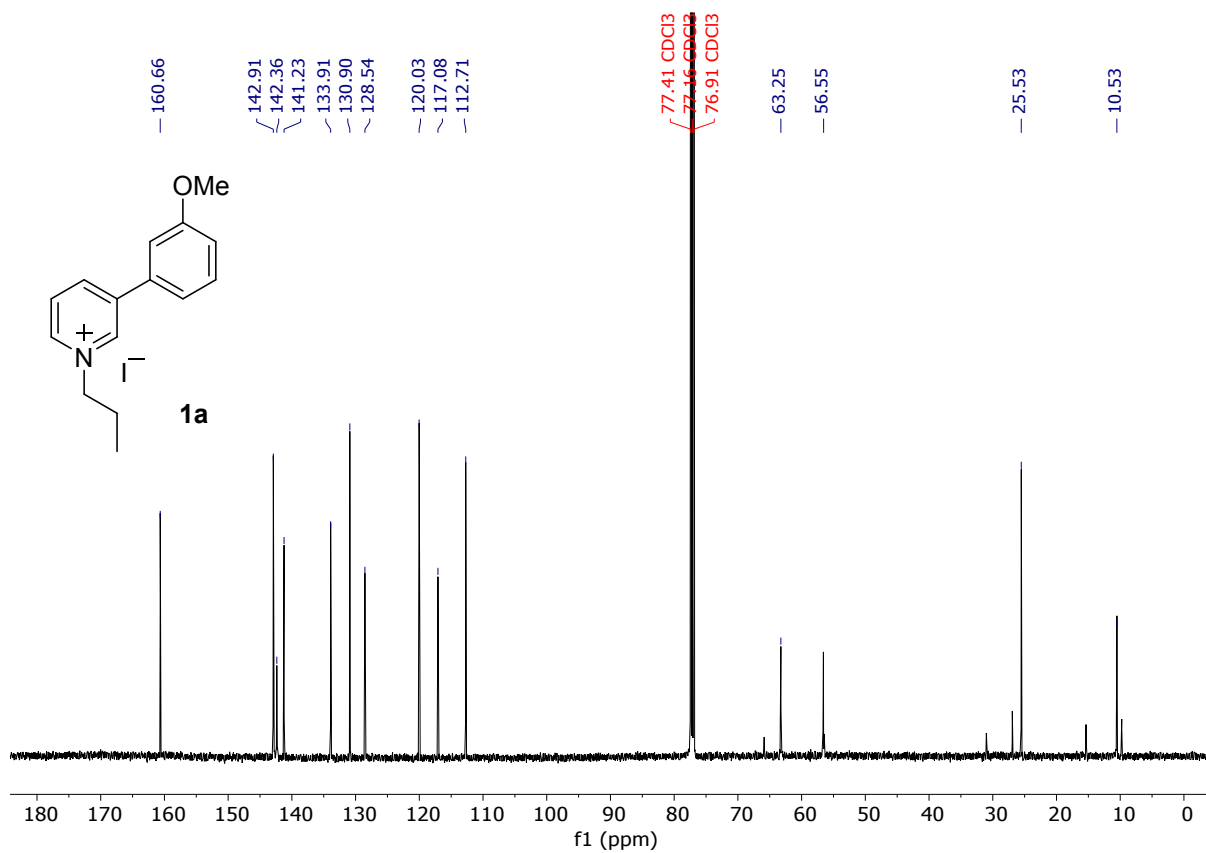

**<sup>1</sup>H & <sup>13</sup>C NMR spectra for 3-(3-(methylsulfonyl)phenyl)-1-propylpyridinium iodide (2a)**

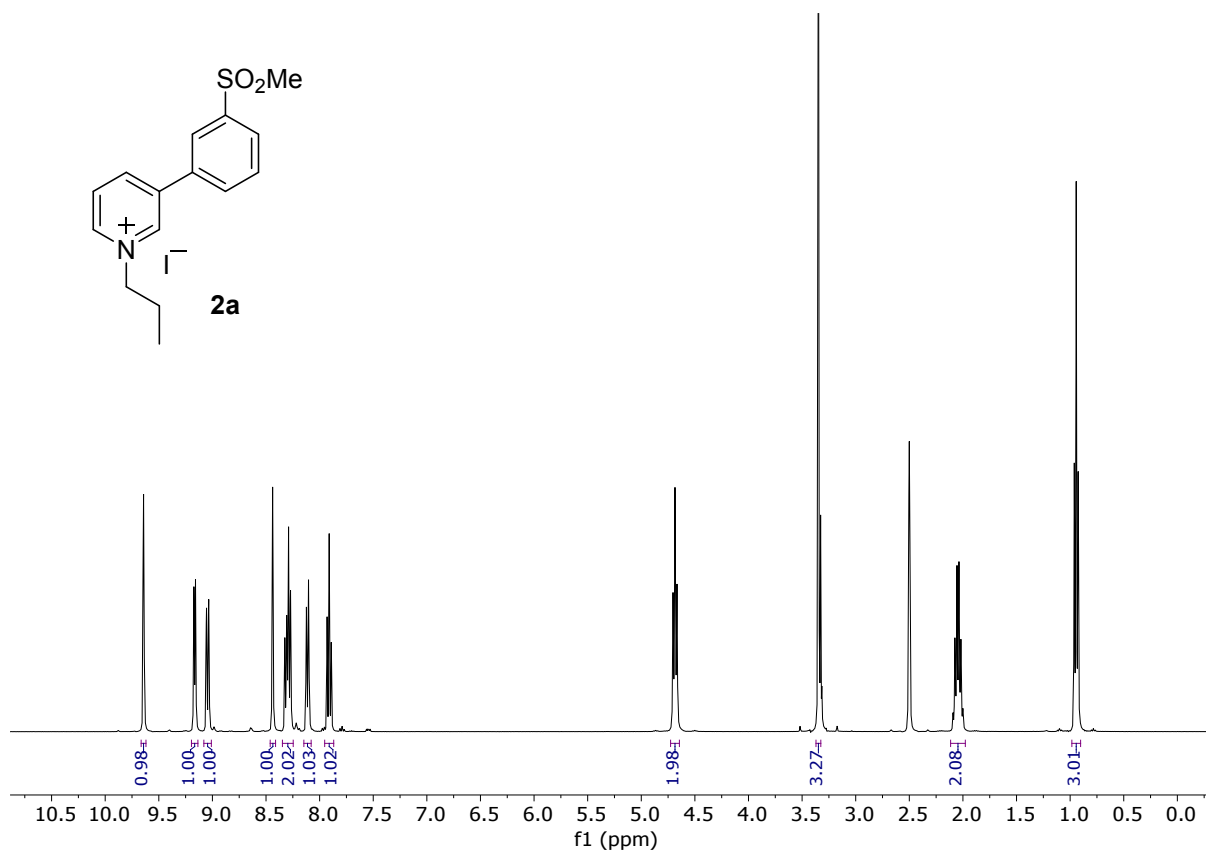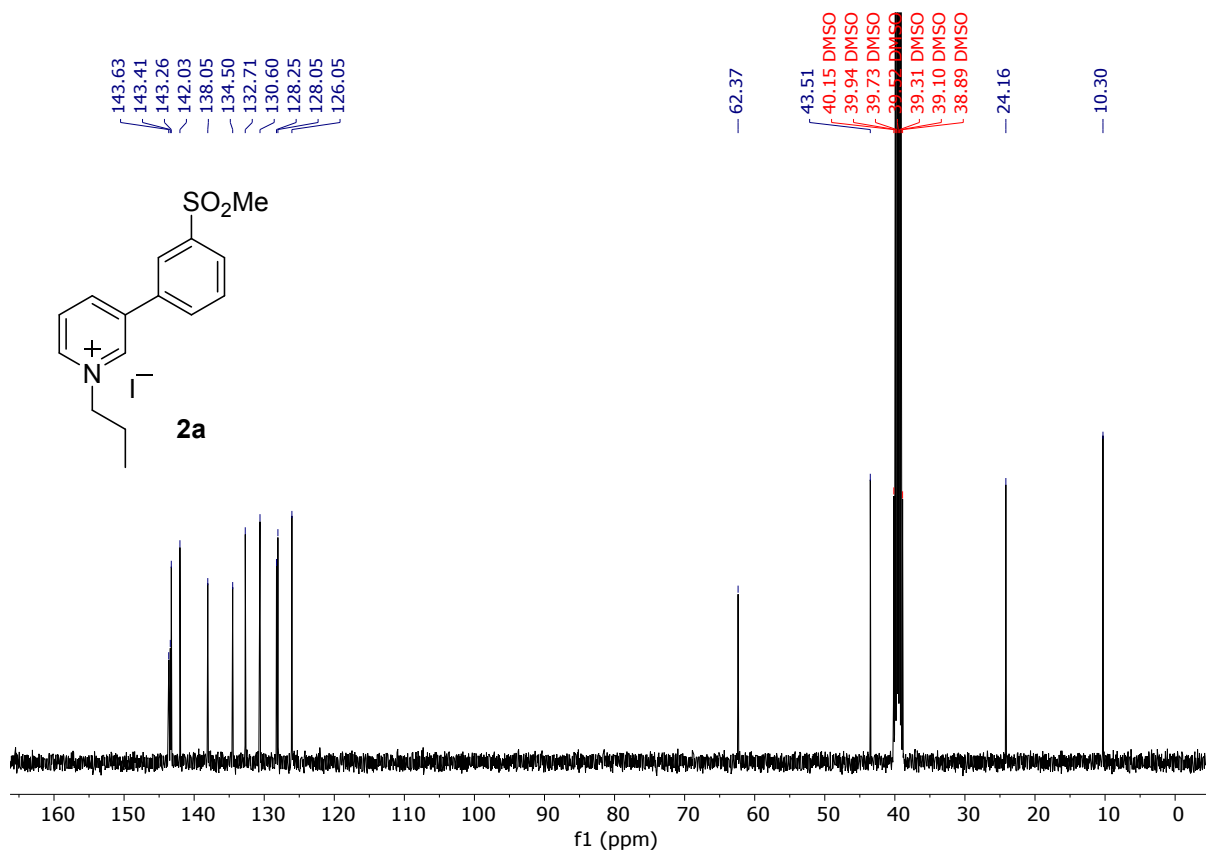

**<sup>1</sup>H & <sup>13</sup>C NMR spectra for 1-allyl-3-(4-bromophenyl)pyridinium bromide (3a)**

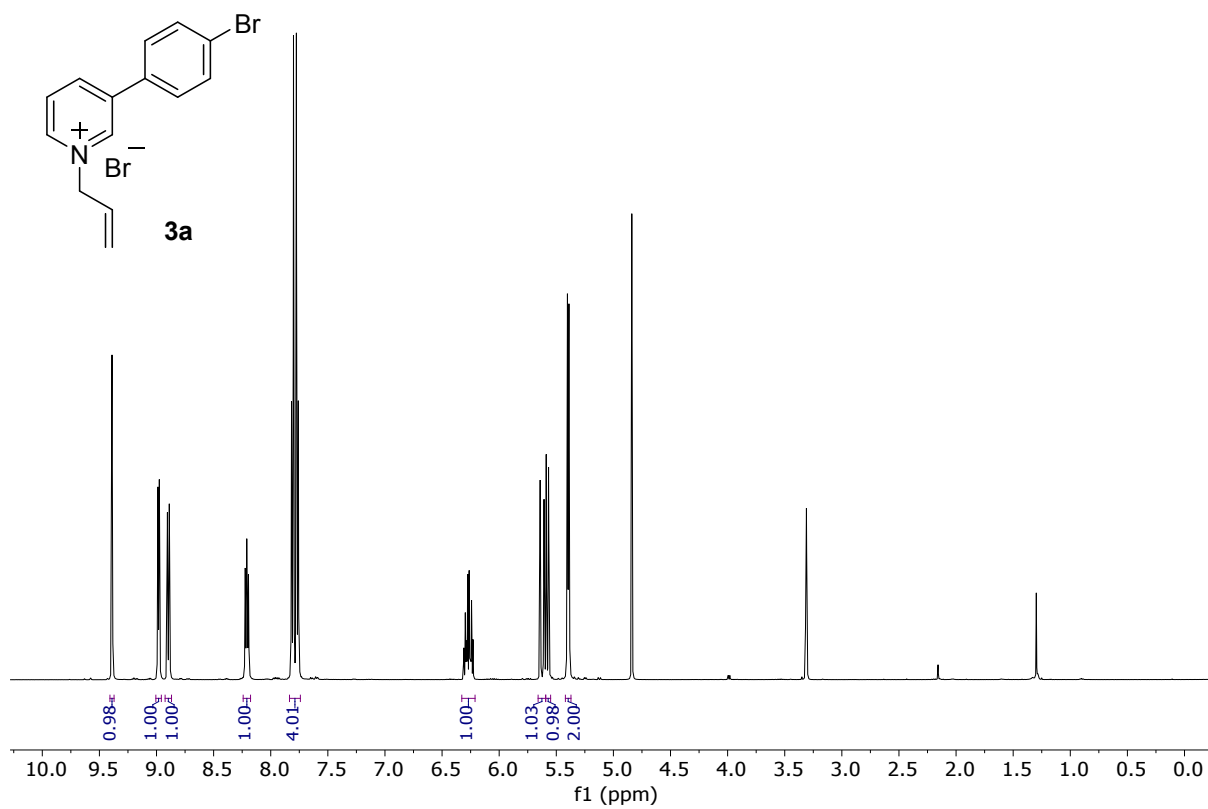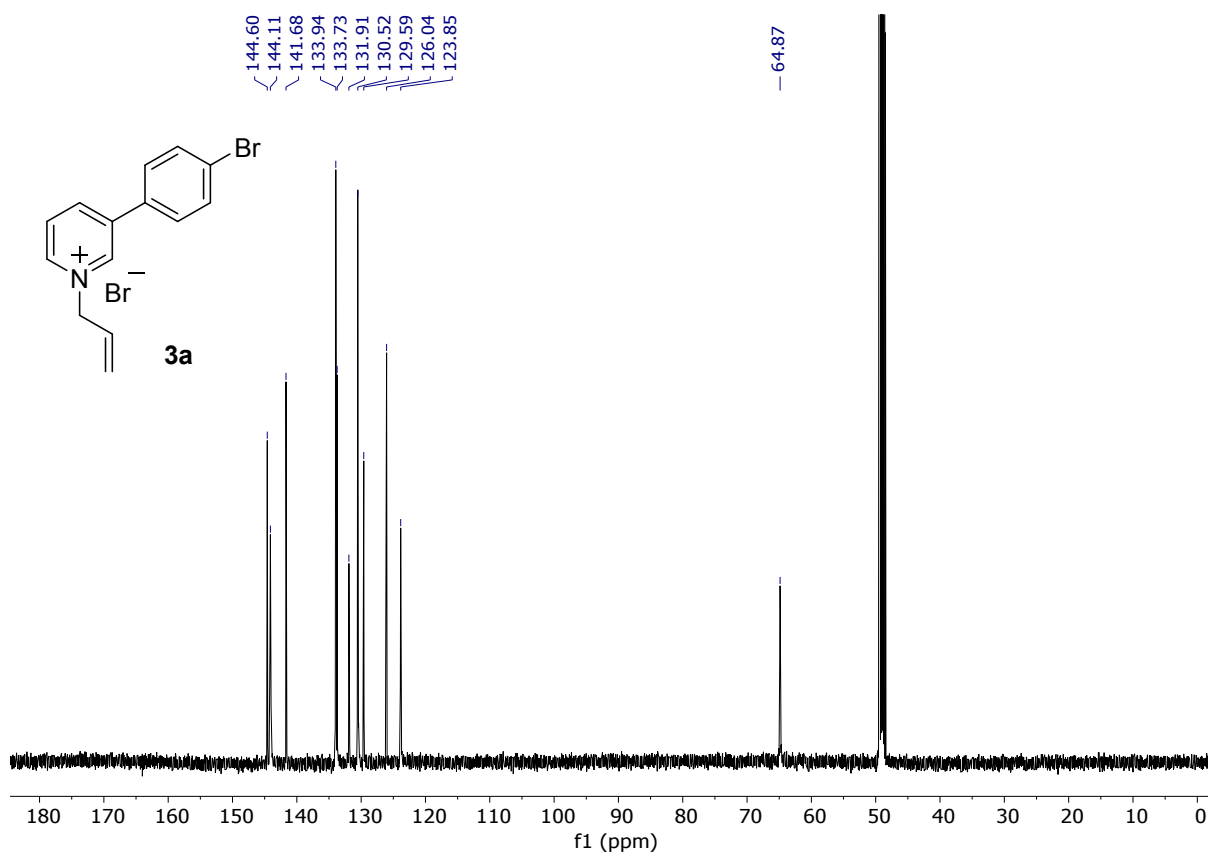

**<sup>1</sup>H & <sup>13</sup>C NMR spectra for 3-(4-acetamidophenyl)-1-allylpyridinium bromide (Crude-4a)**

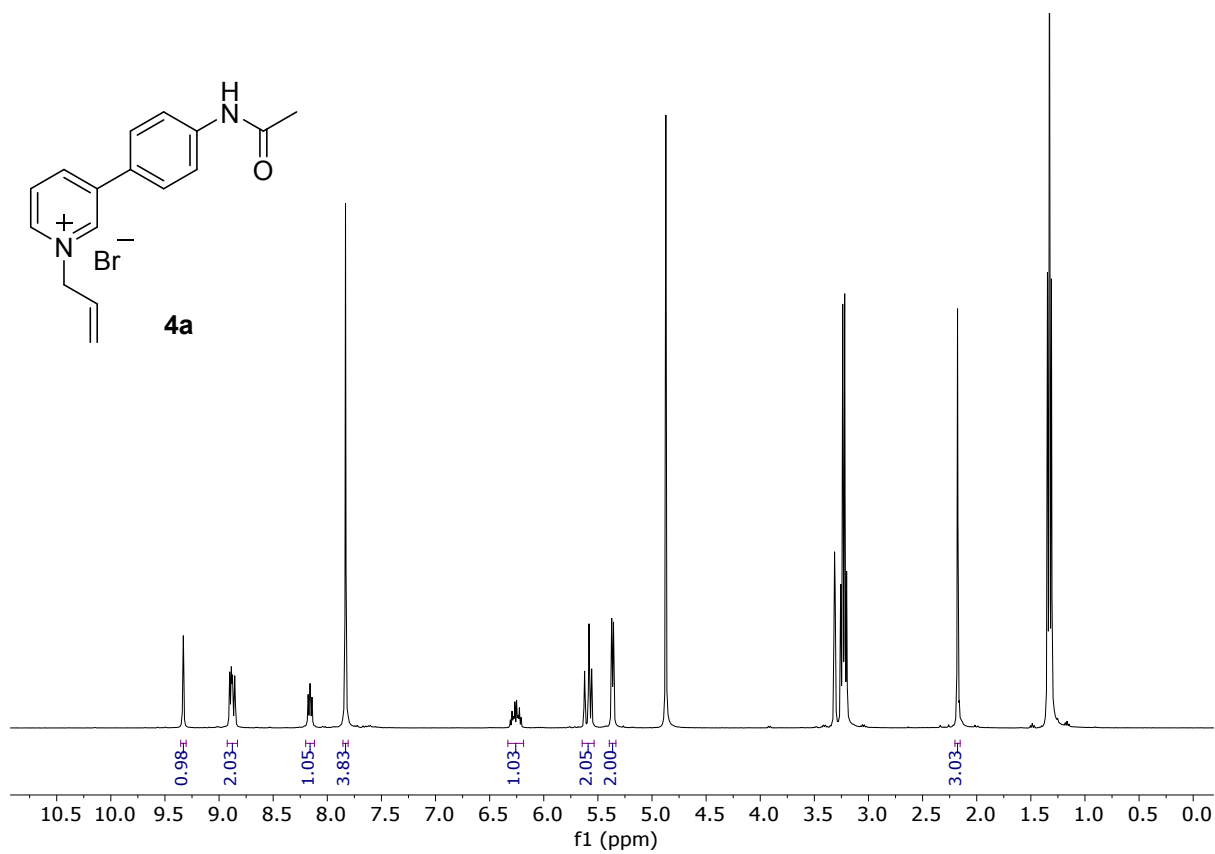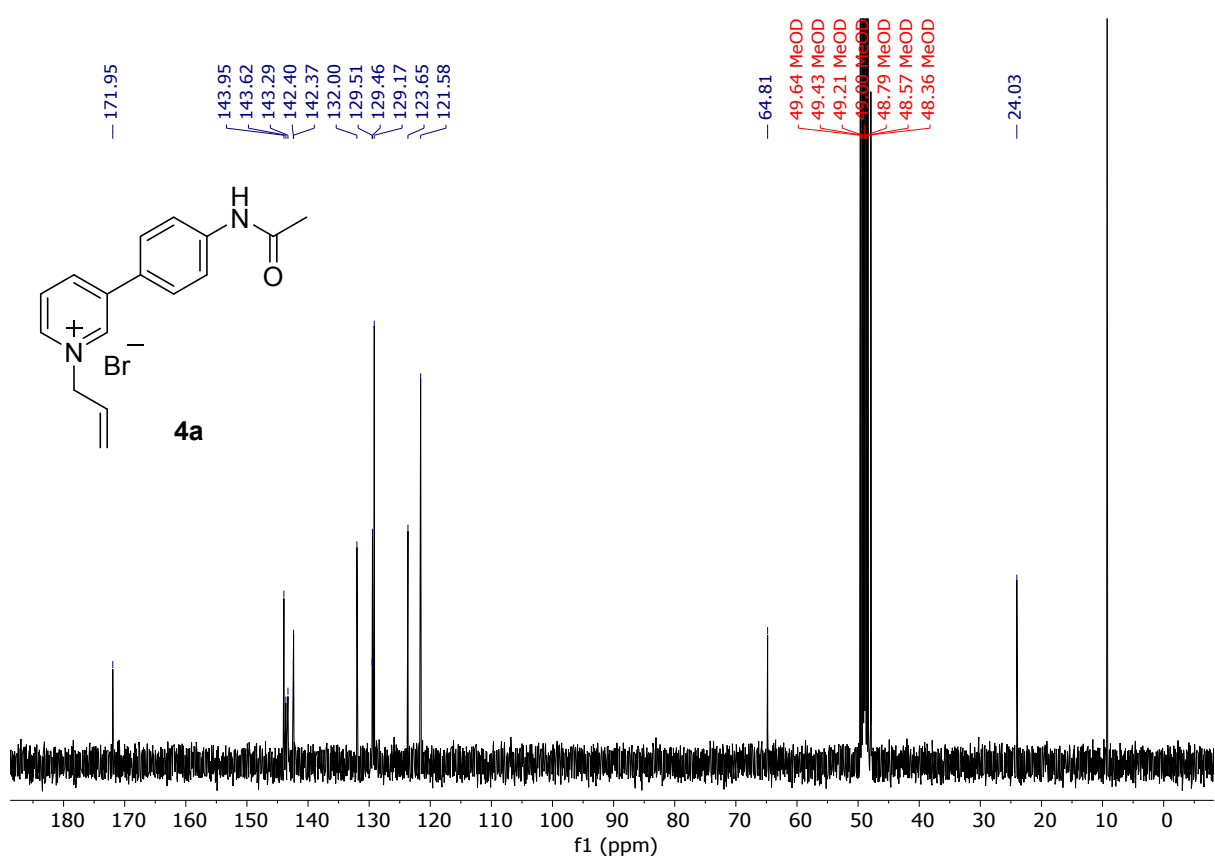

**<sup>1</sup>H & <sup>13</sup>C NMR spectra for 1-ethyl-3-phenylpyridinium iodide (5a)**

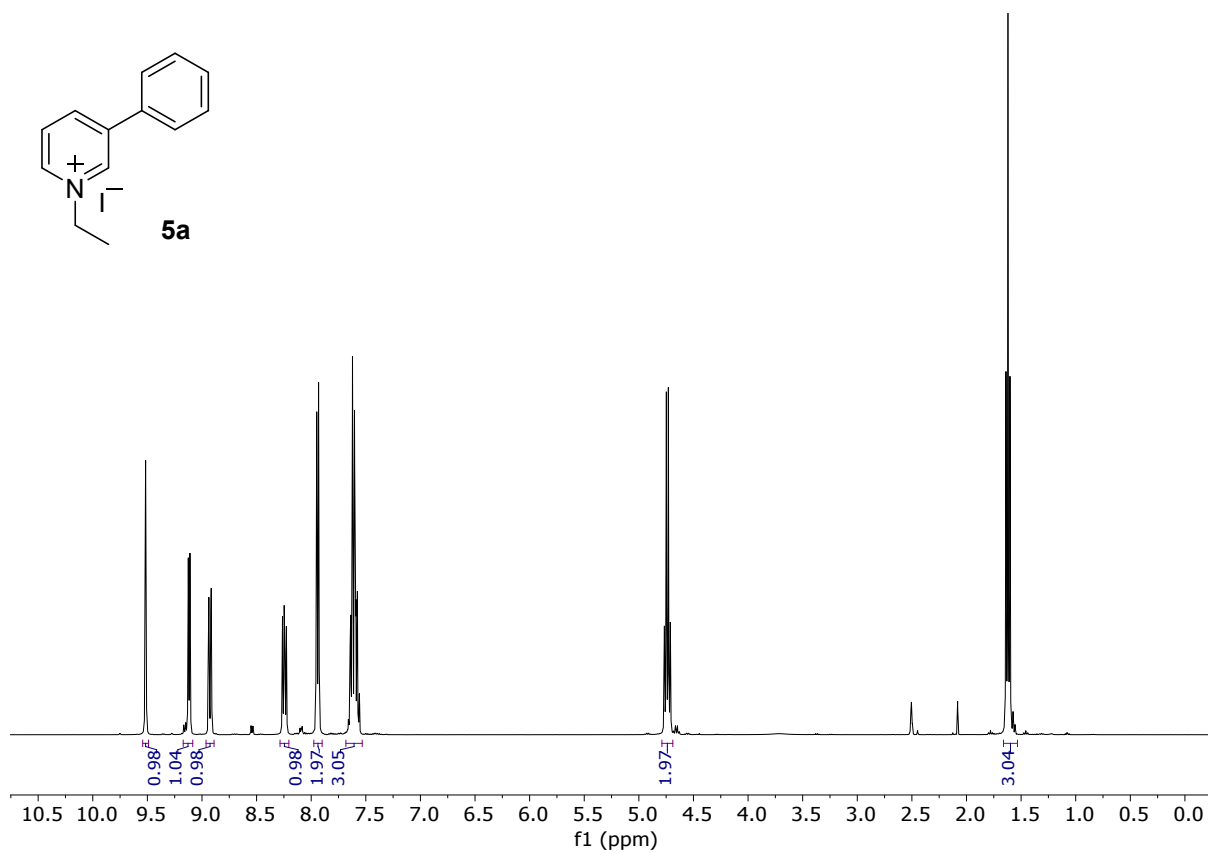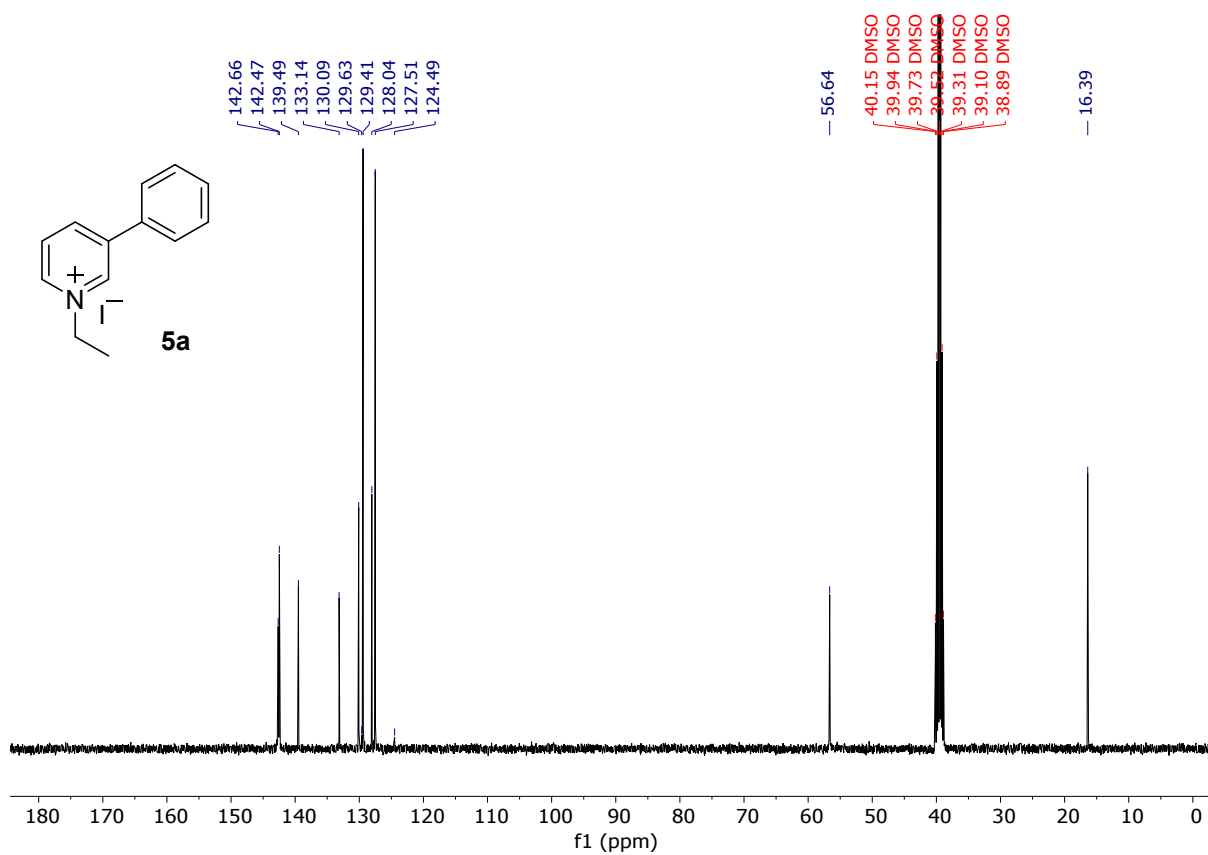

**<sup>1</sup>H & <sup>13</sup>C NMR spectra for 1-ethyl-3-(4-fluorophenyl)pyridinium iodide (6a)**



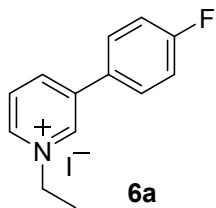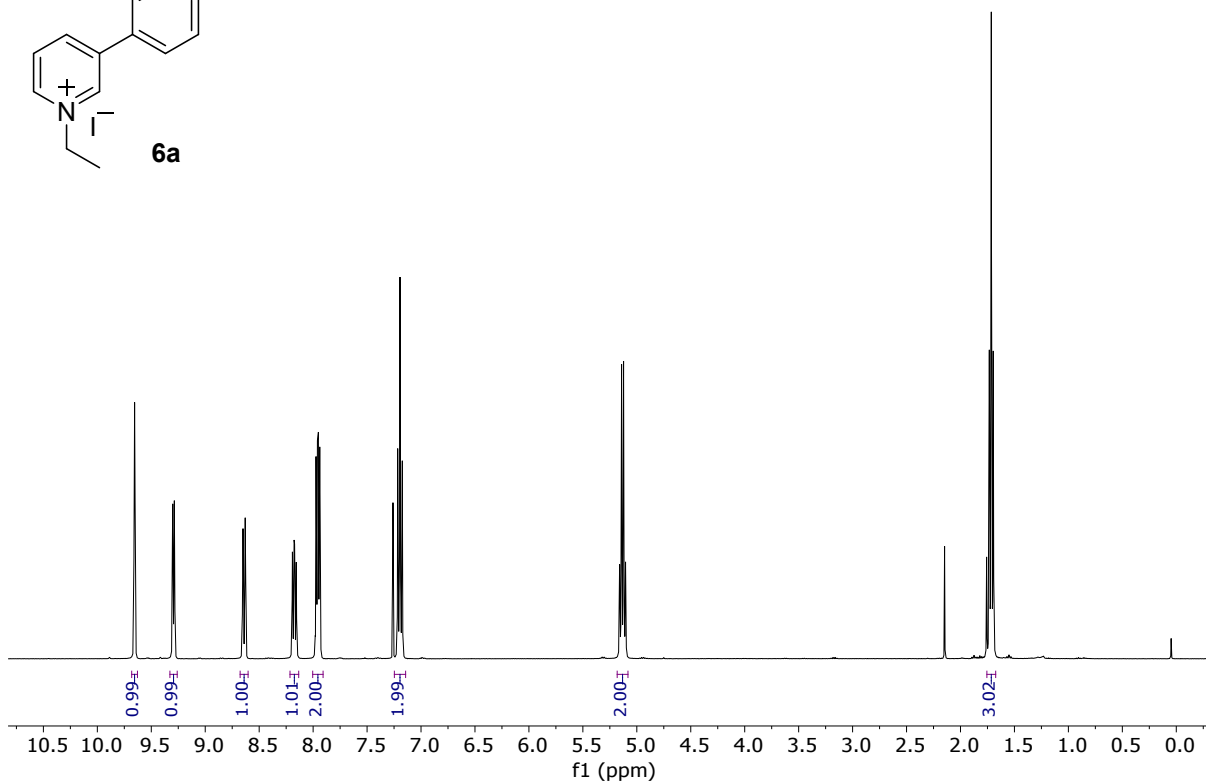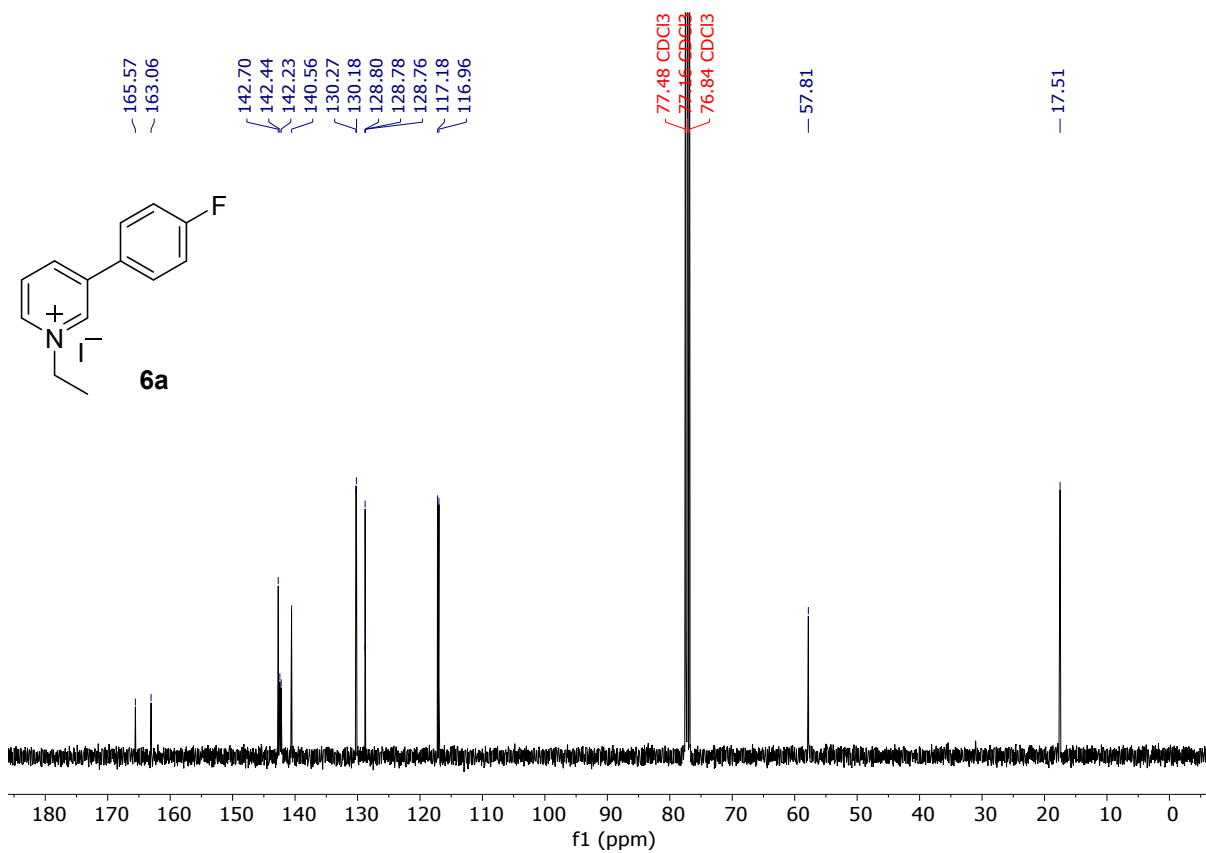

<sup>1</sup>H & <sup>13</sup>C NMR spectra for 1-ethyl-3-(4-methoxyphenyl)pyridinium iodide (7a)

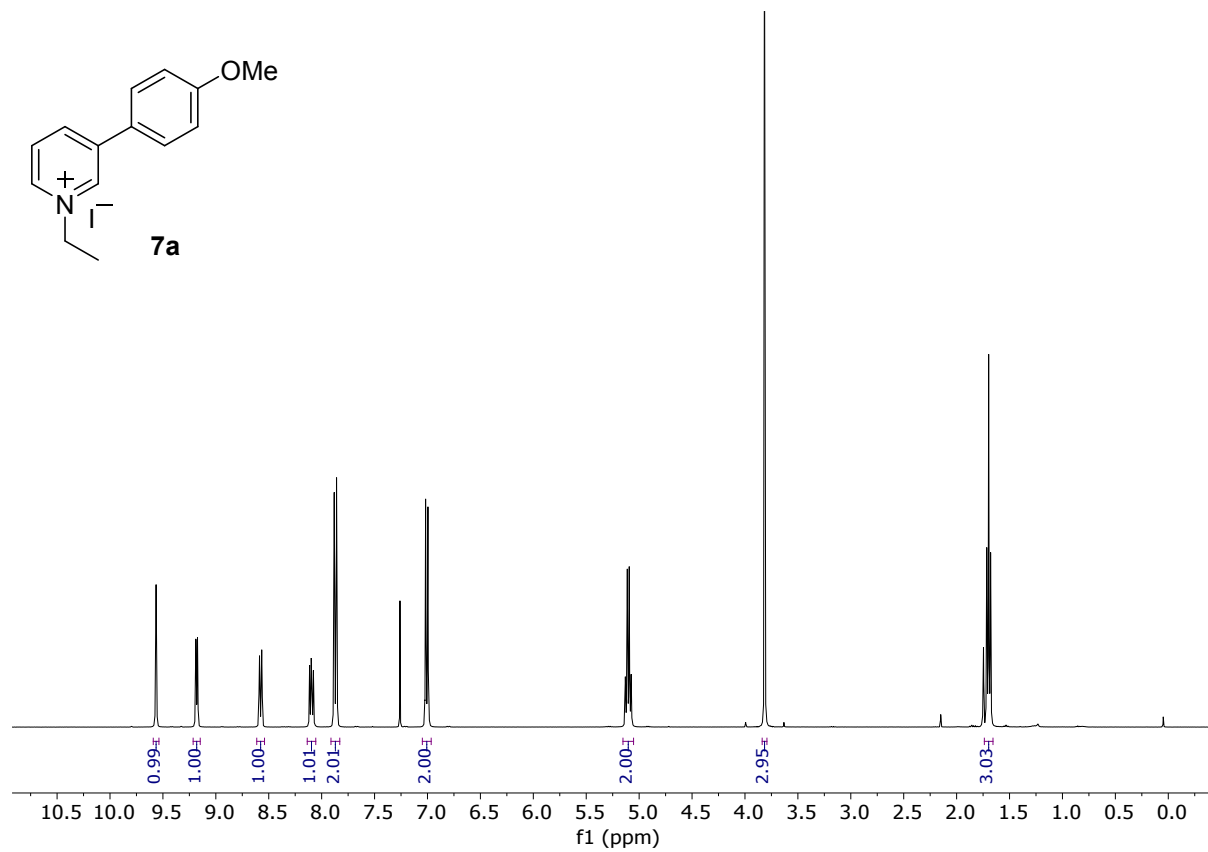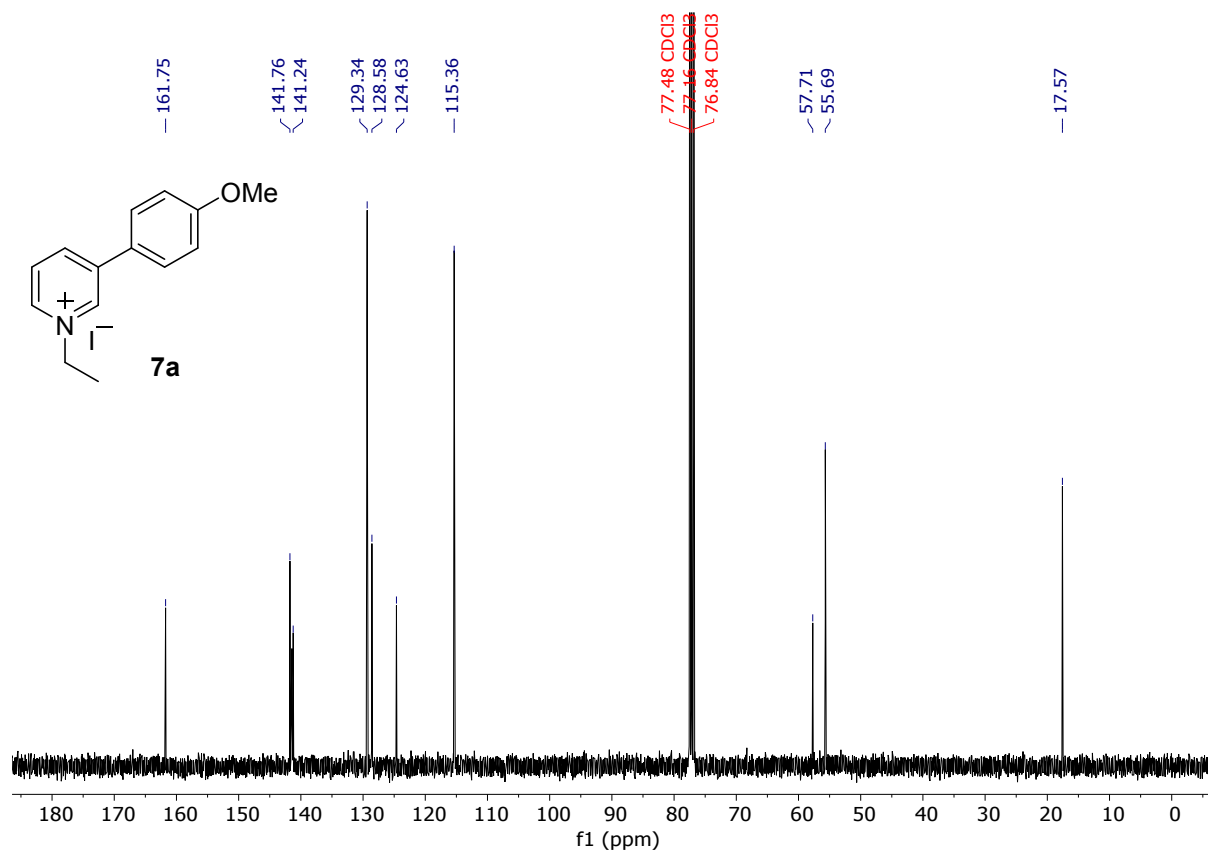

**<sup>1</sup>H & <sup>13</sup>C NMR spectra for 1-ethyl-3-(furan-2-yl)pyridinium iodide (8a)**

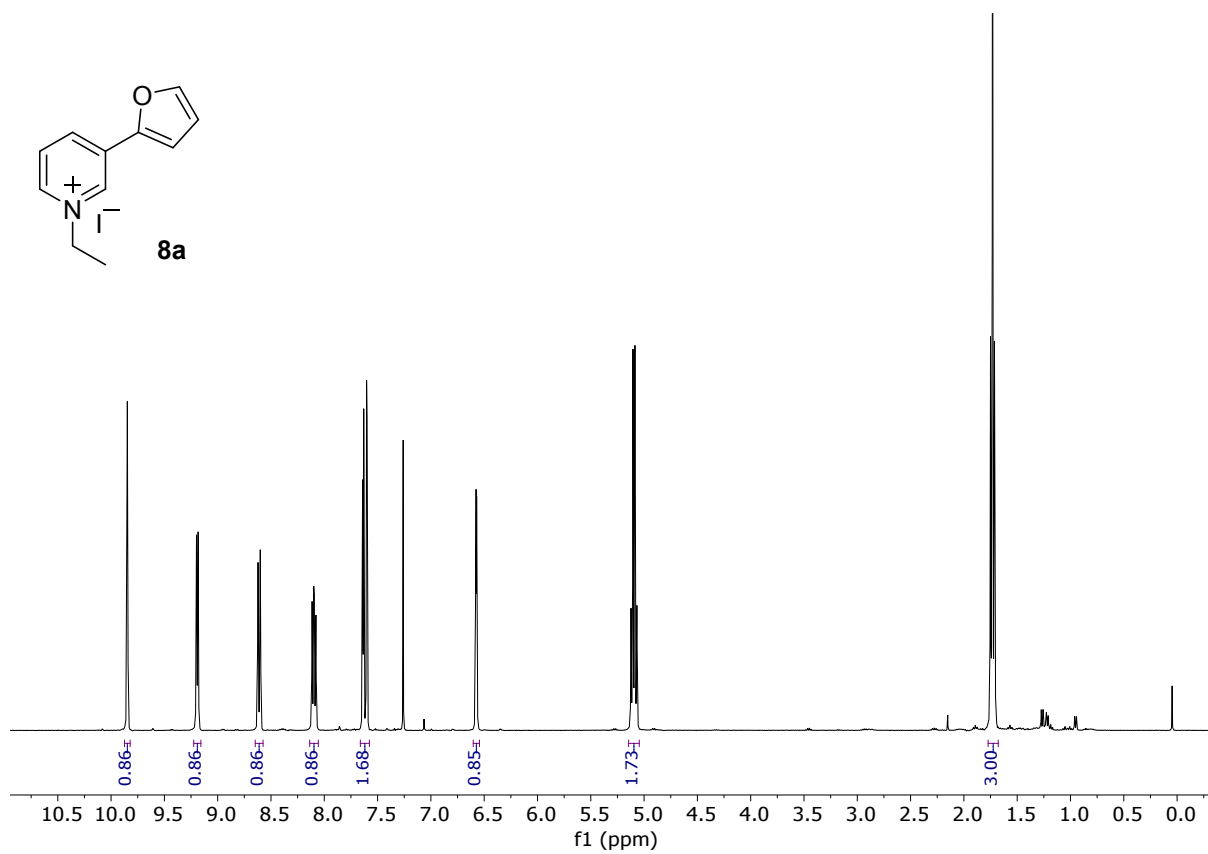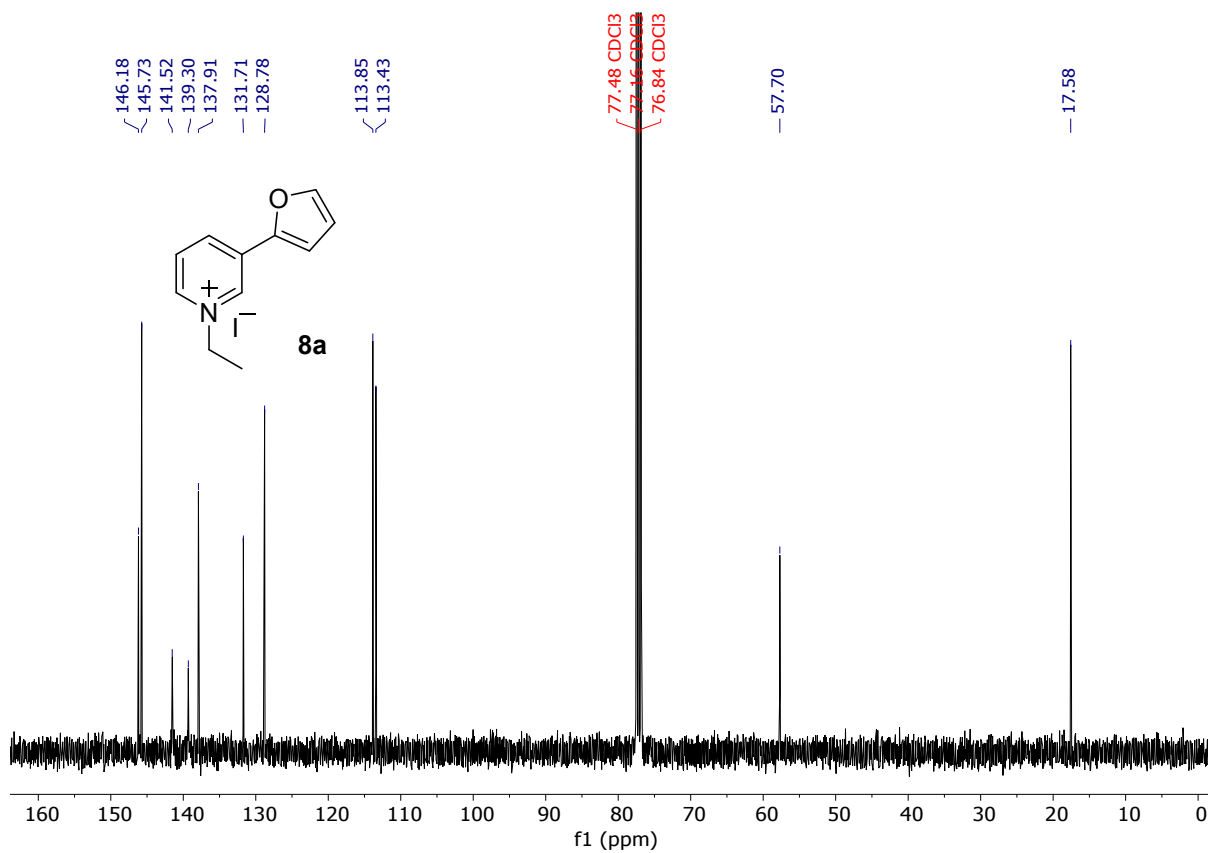

**<sup>1</sup>H & <sup>13</sup>C NMR spectra for 1-ethyl-3-(thiophen-2-yl)pyridinium iodide (9a)**

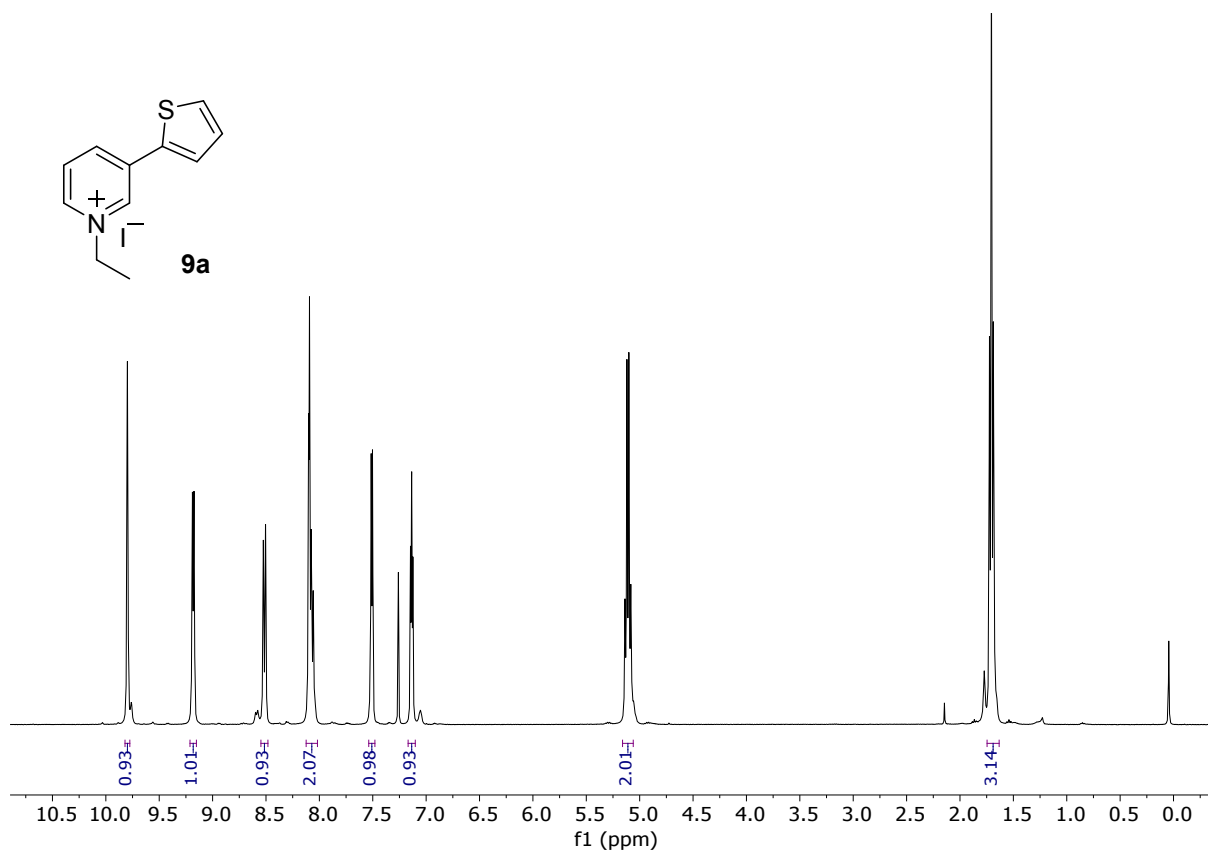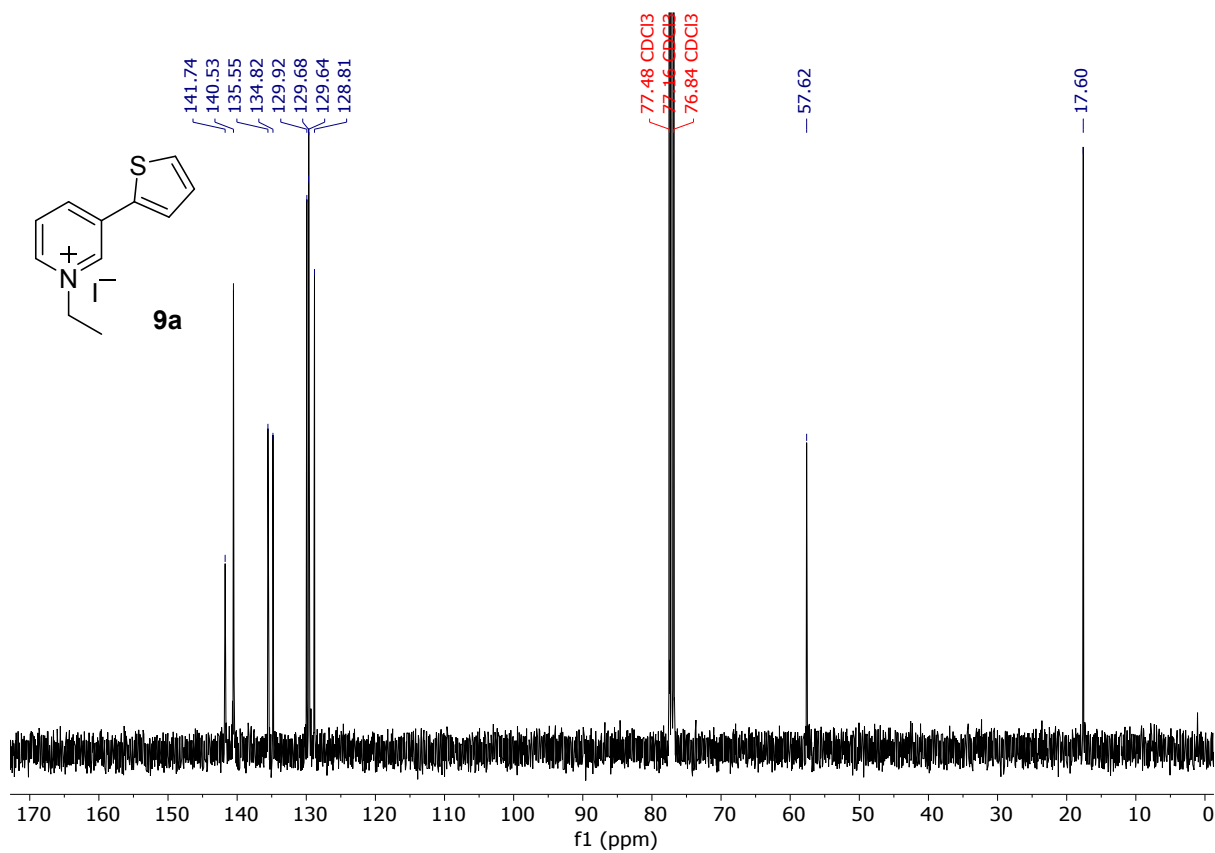

**<sup>1</sup>H & <sup>13</sup>C NMR spectra for 1-ethyl-3-(naphthalen-2-yl)pyridinium iodide (10a)**

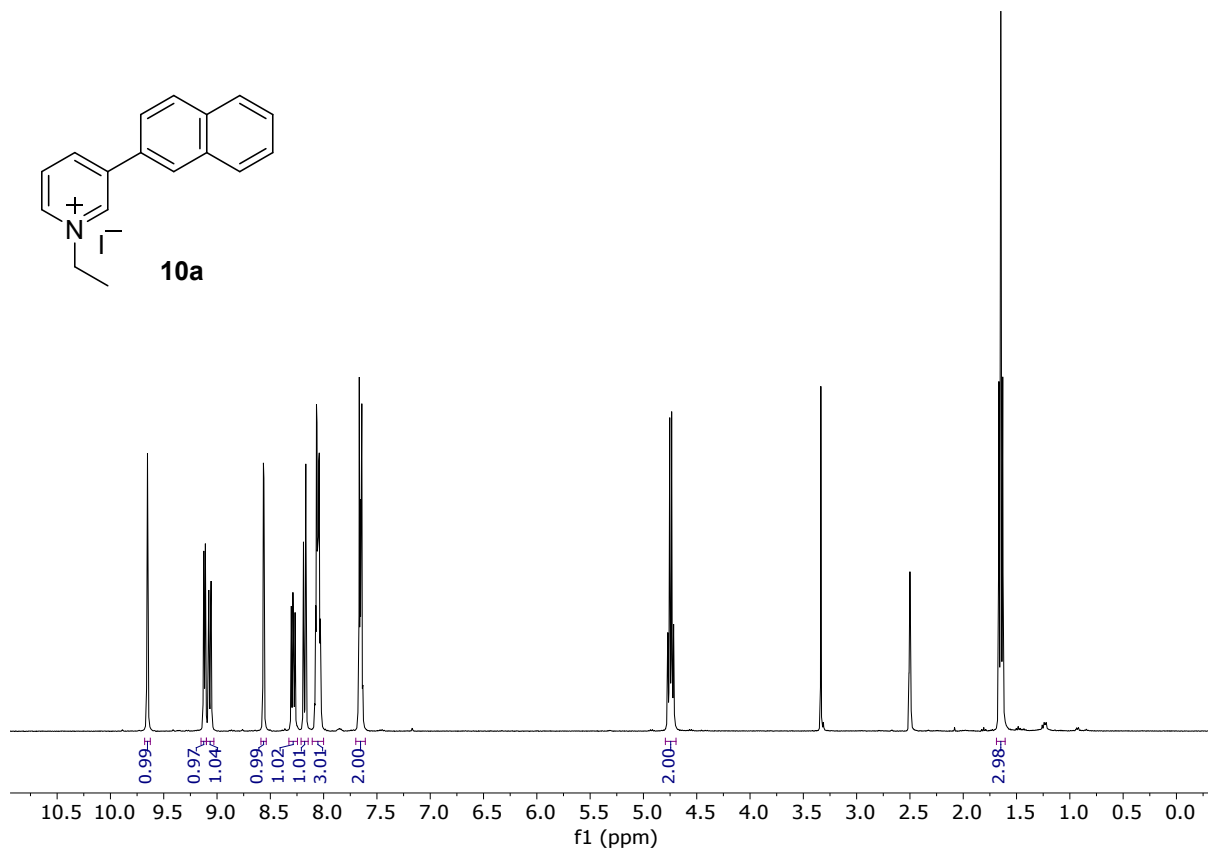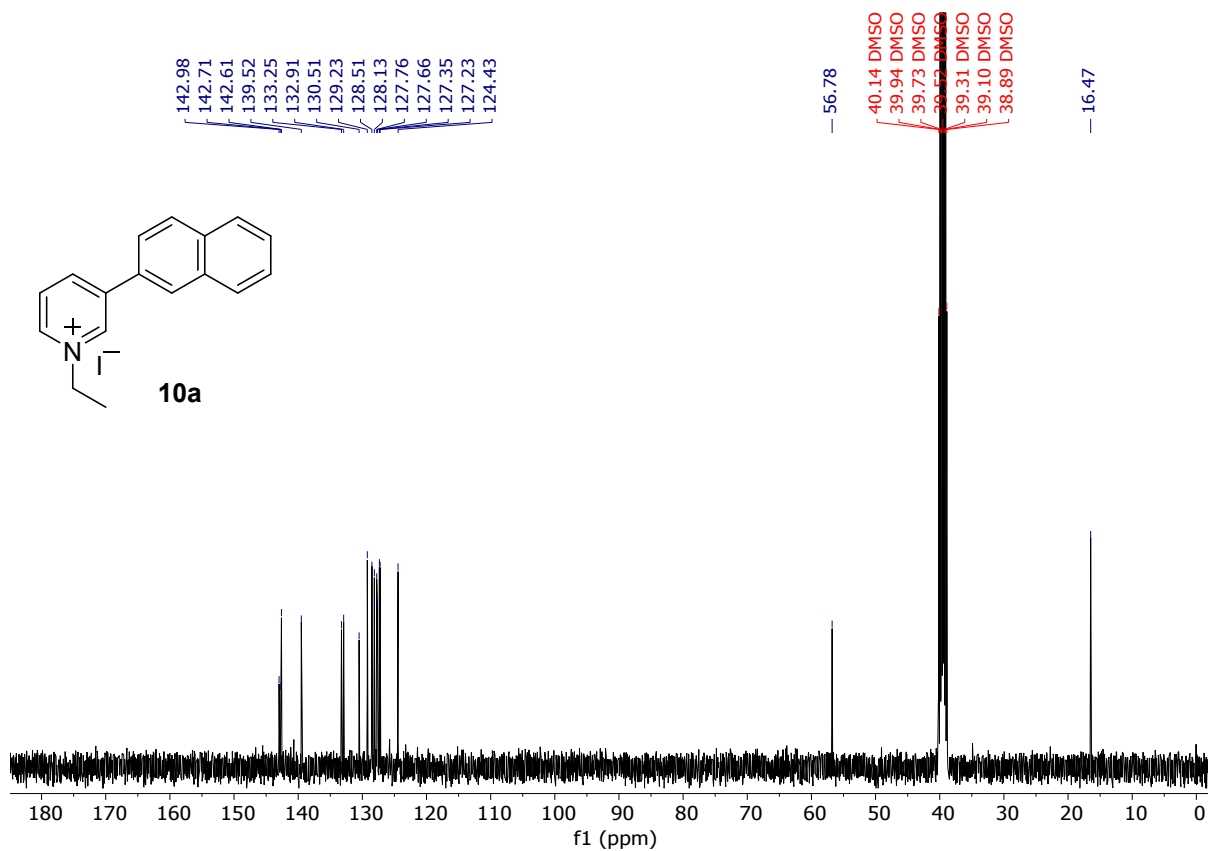

**<sup>1</sup>H & <sup>13</sup>C NMR spectra for 1-methyl-3-phenylpyridinium iodide (11a)**

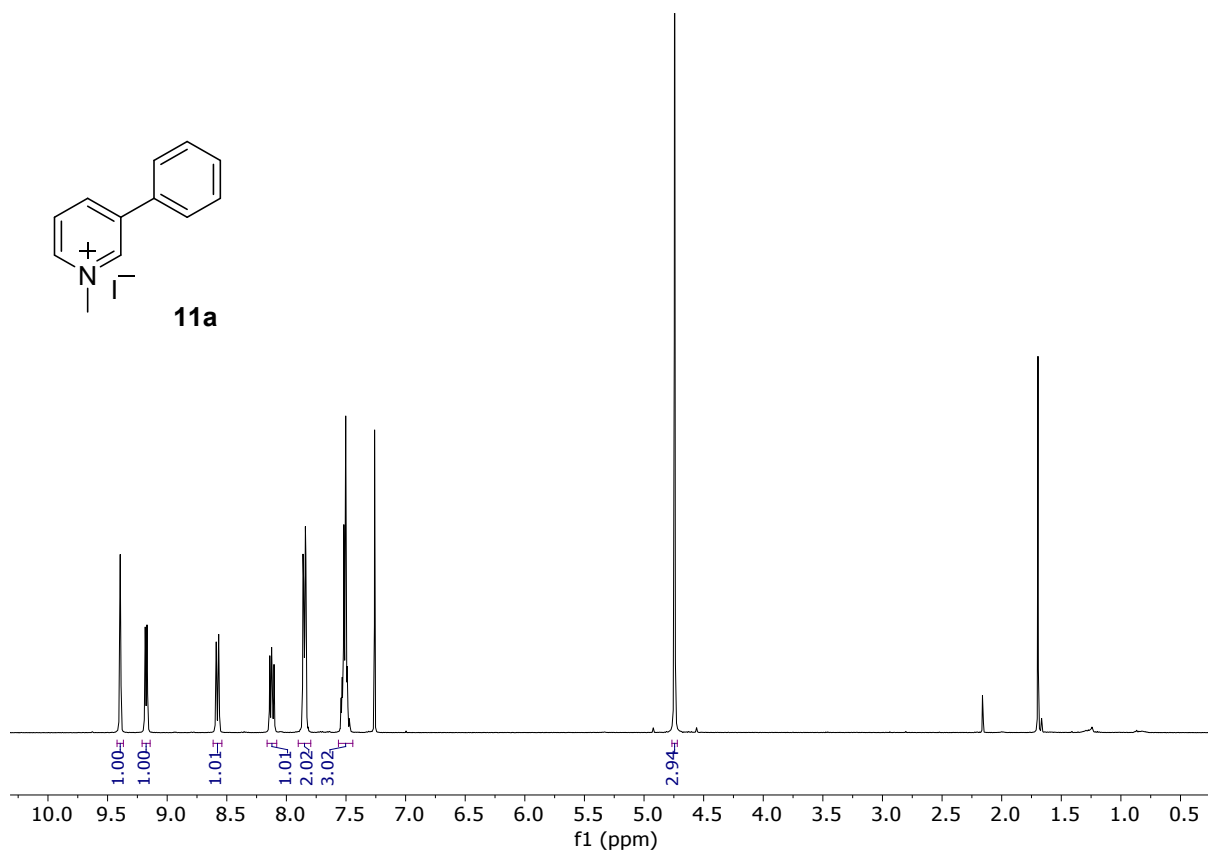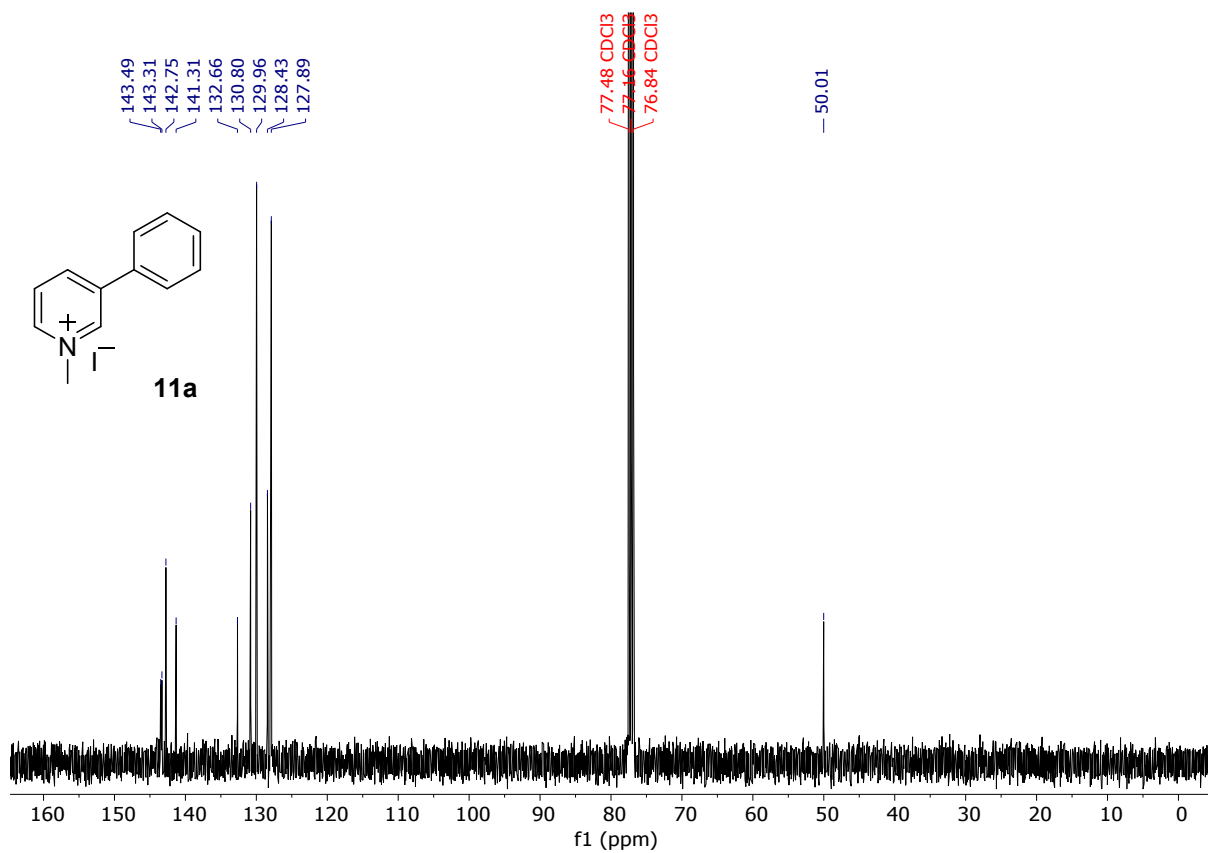

**<sup>1</sup>H & <sup>13</sup>C NMR spectra for 3-phenyl-1-(prop-2-yn-1-yl)pyridinium bromide (12a)**

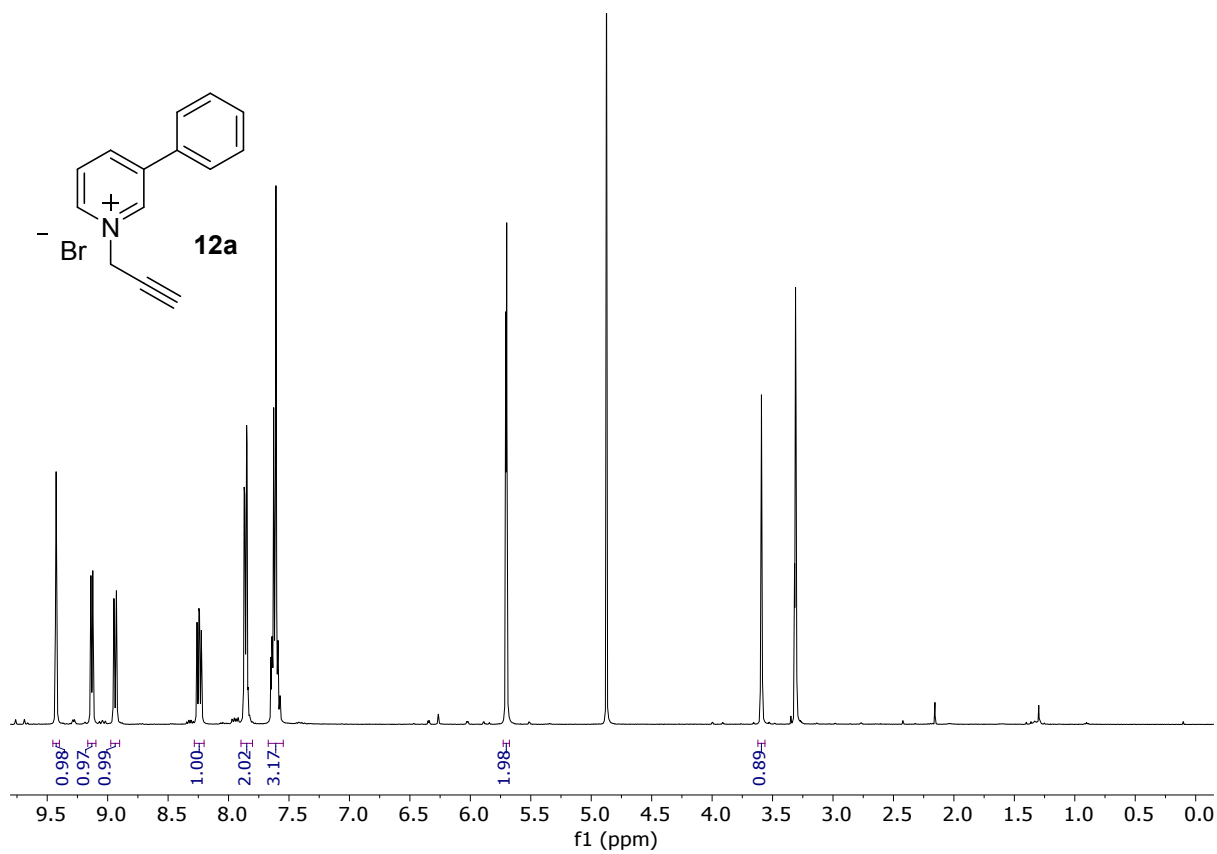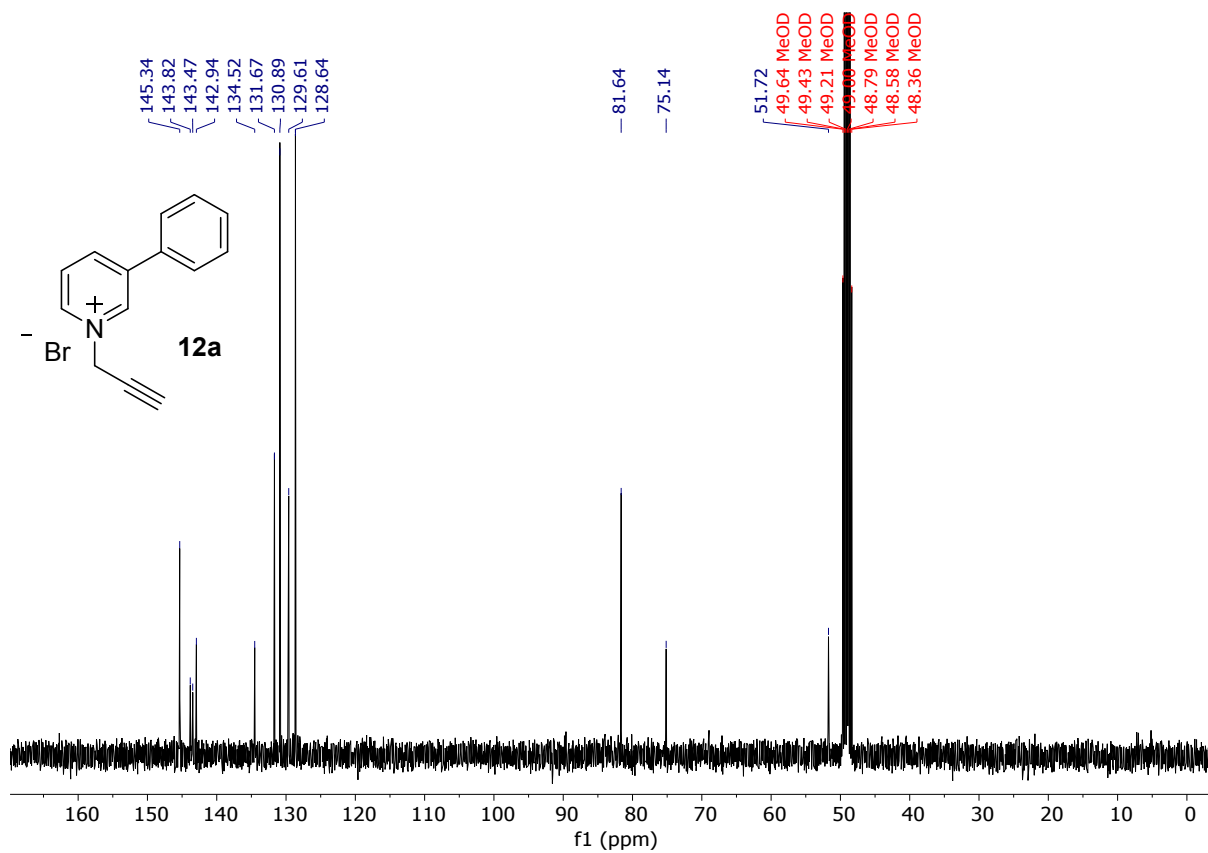

**<sup>1</sup>H & <sup>13</sup>C NMR spectra for 1-ethyl-3-methylpyridinium iodide (13a)**

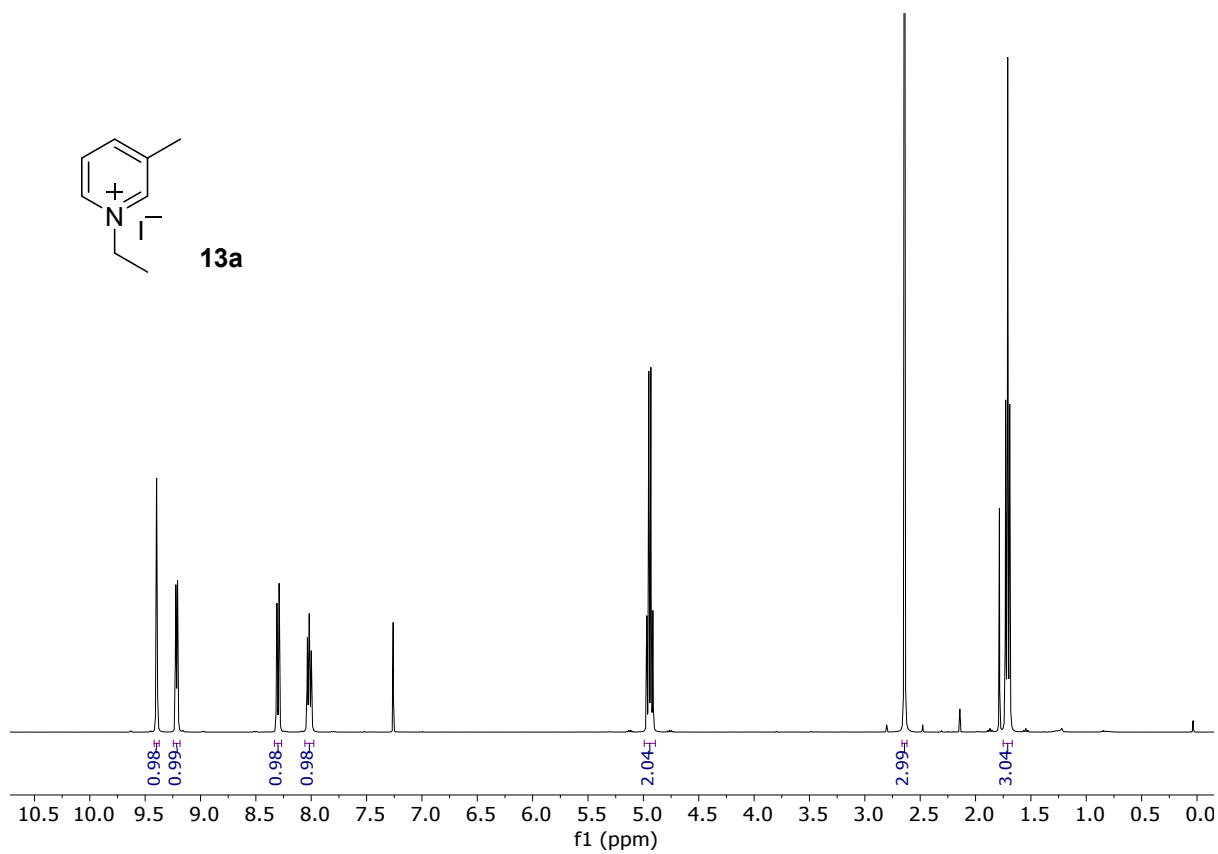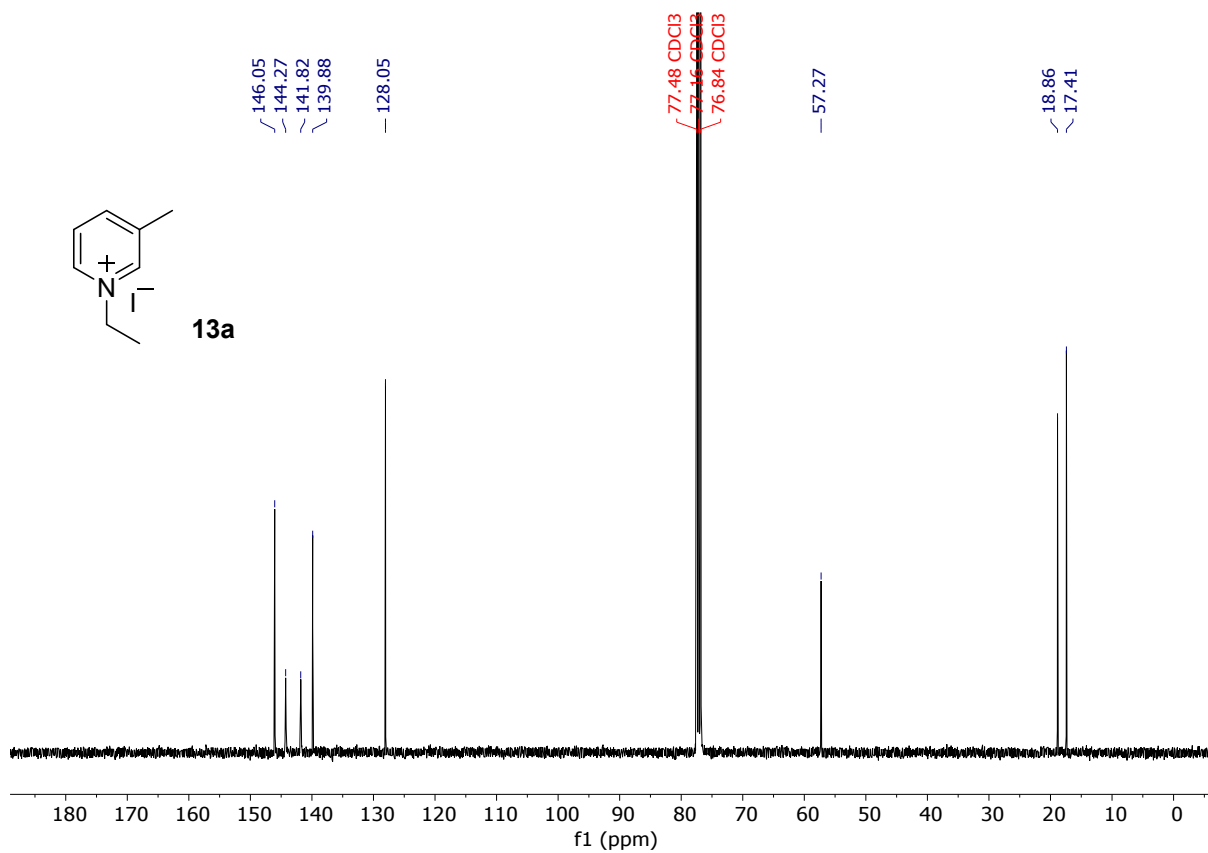

**<sup>1</sup>H & <sup>13</sup>C NMR spectra for 1-benzyl-3-methylpyridinium bromide (14a)**



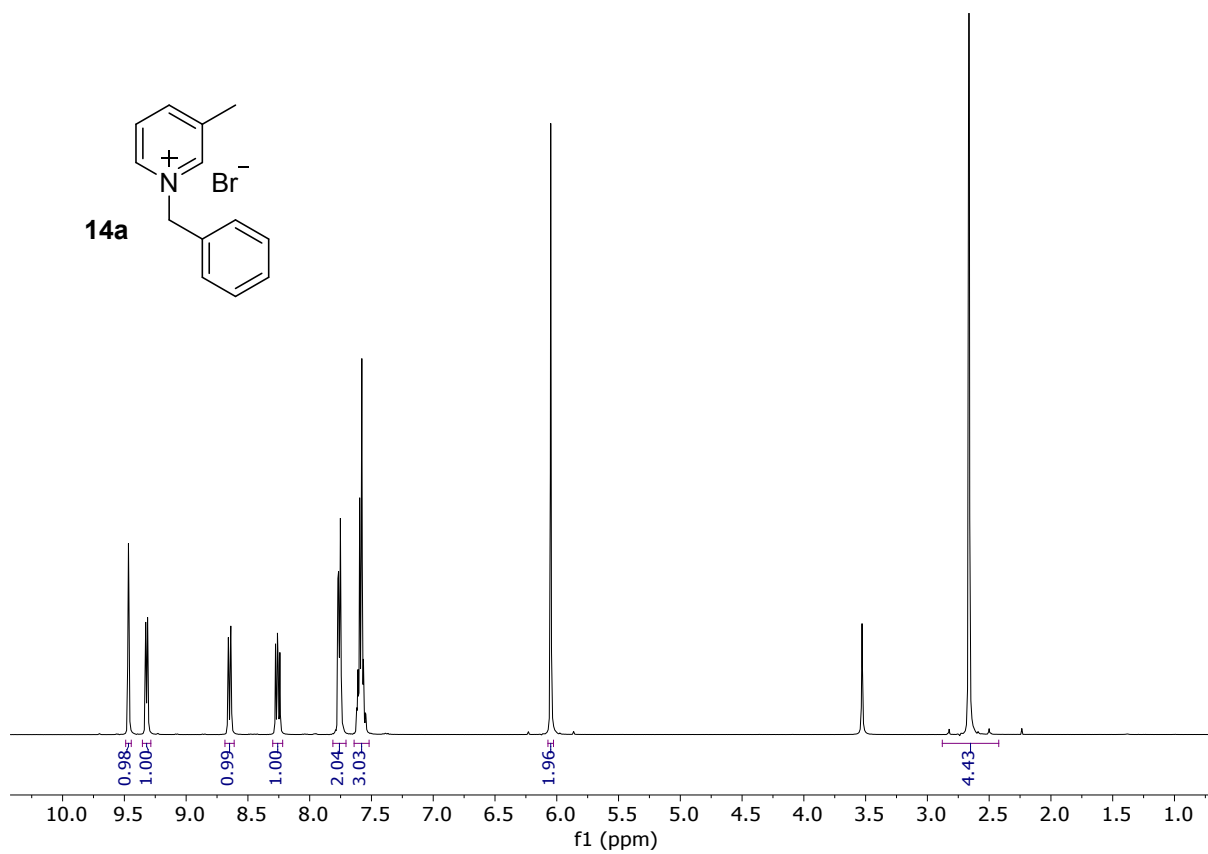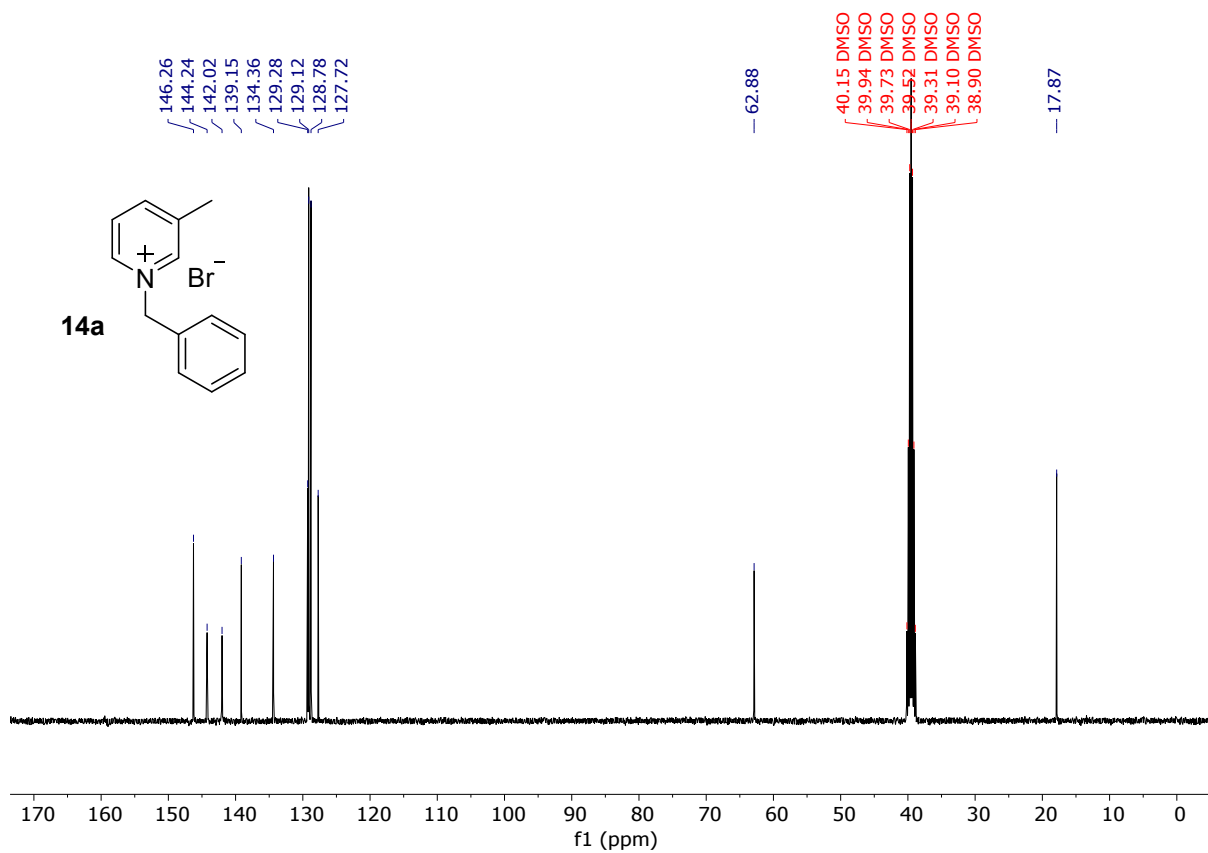

**<sup>1</sup>H & <sup>13</sup>C NMR spectra for 1-ethyl-4-methylpyridinium iodide (15a)**

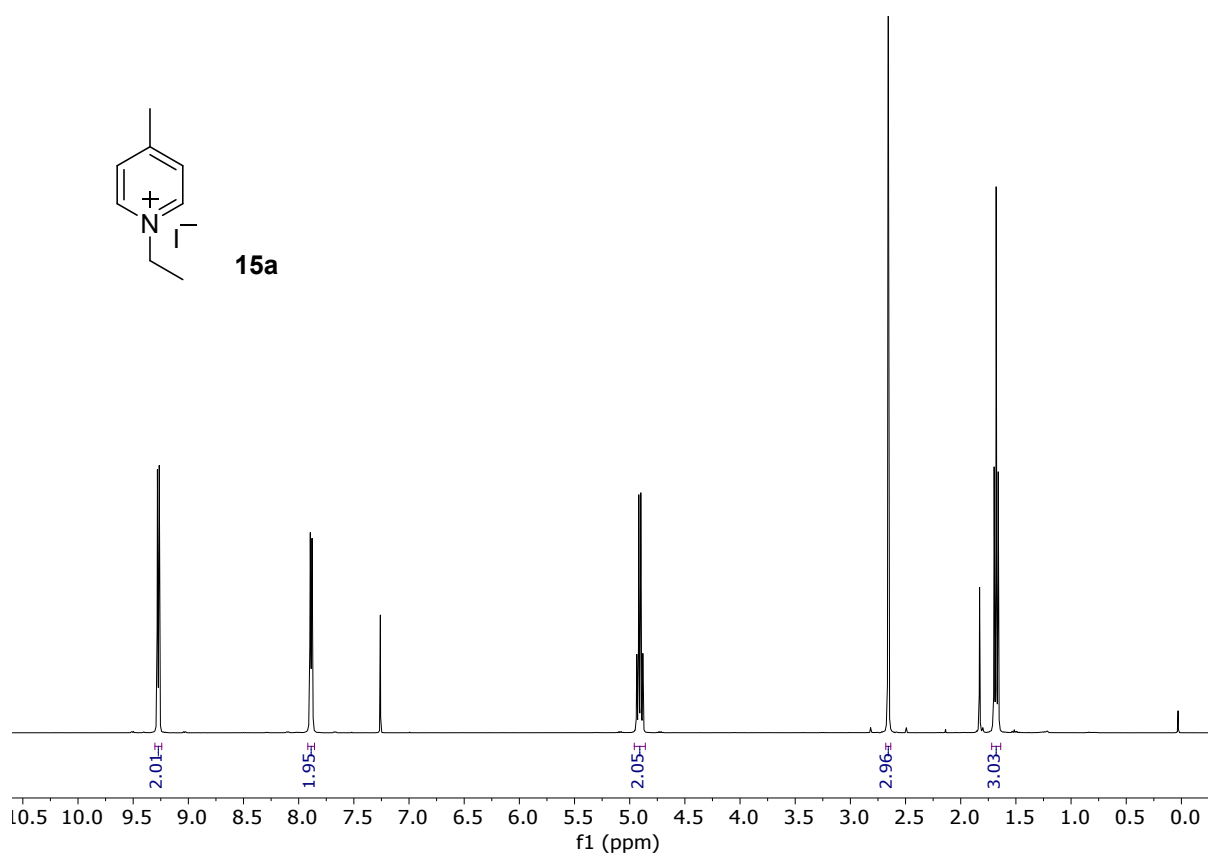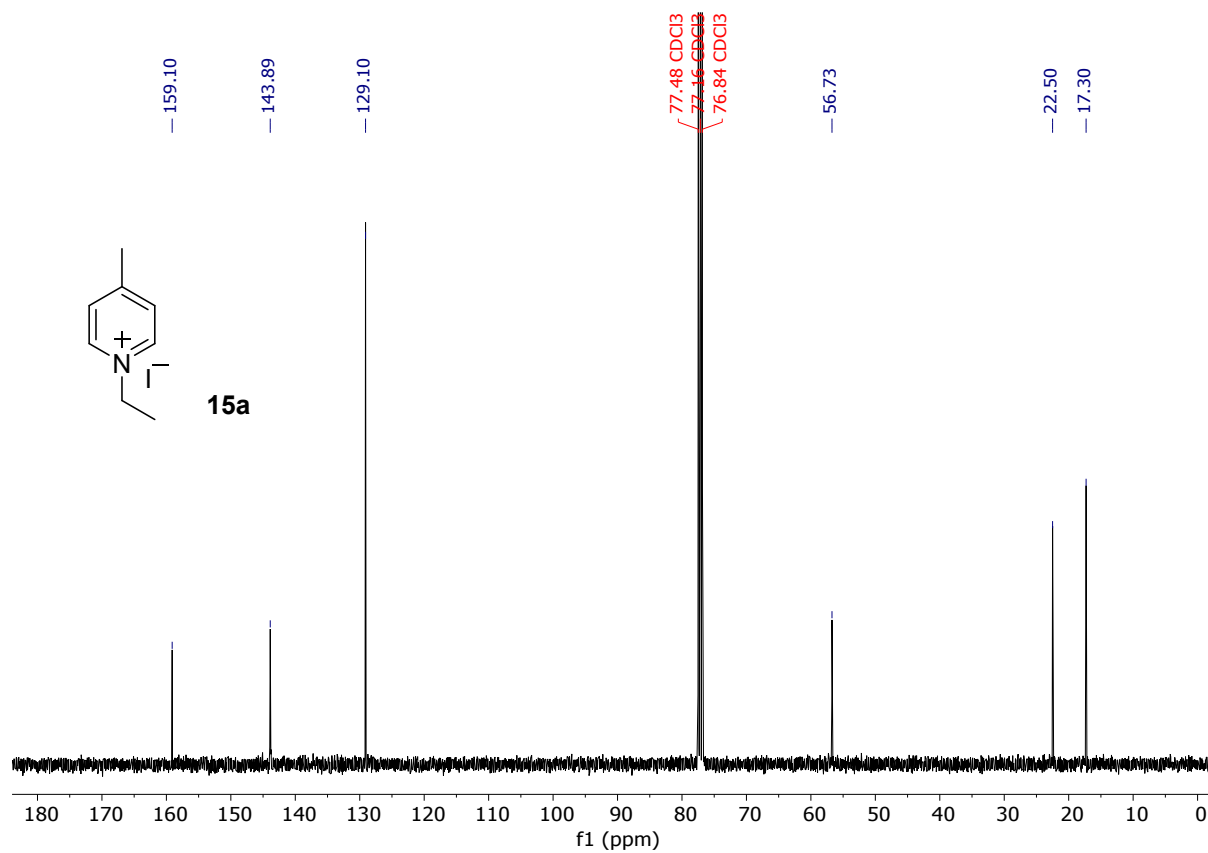

**<sup>1</sup>H & <sup>13</sup>C NMR spectra for 1-ethyl-4-phenylpyridinium iodide (16a)**

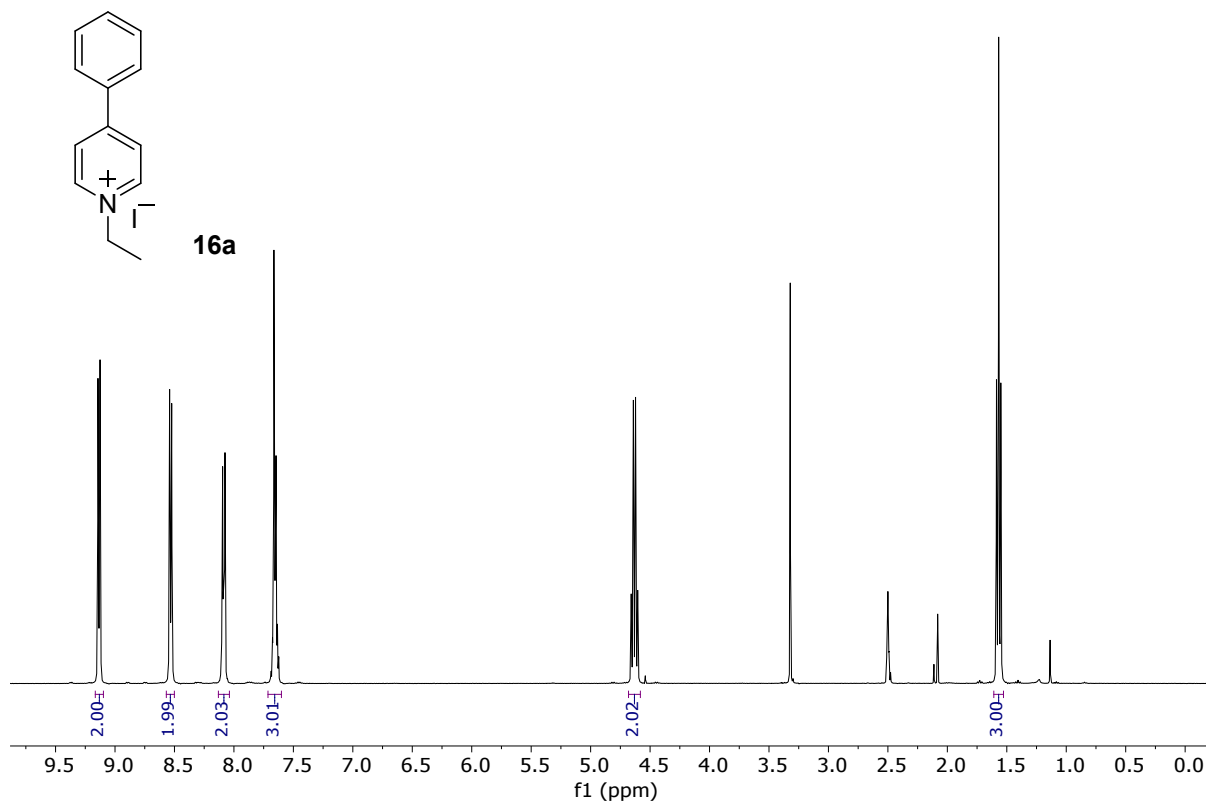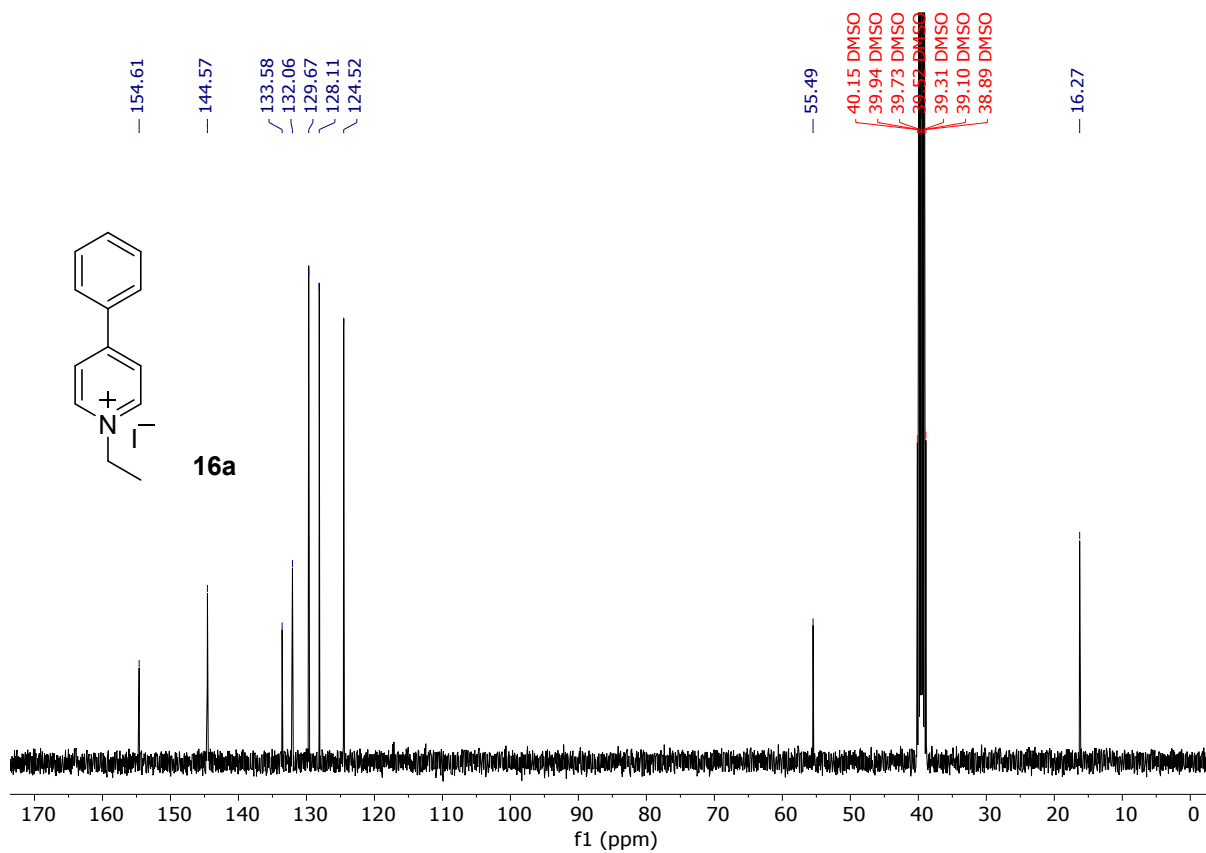

**<sup>1</sup>H & <sup>13</sup>C NMR spectra for 1-ethyl-3,4-dimethylpyridinium iodide (17a)**

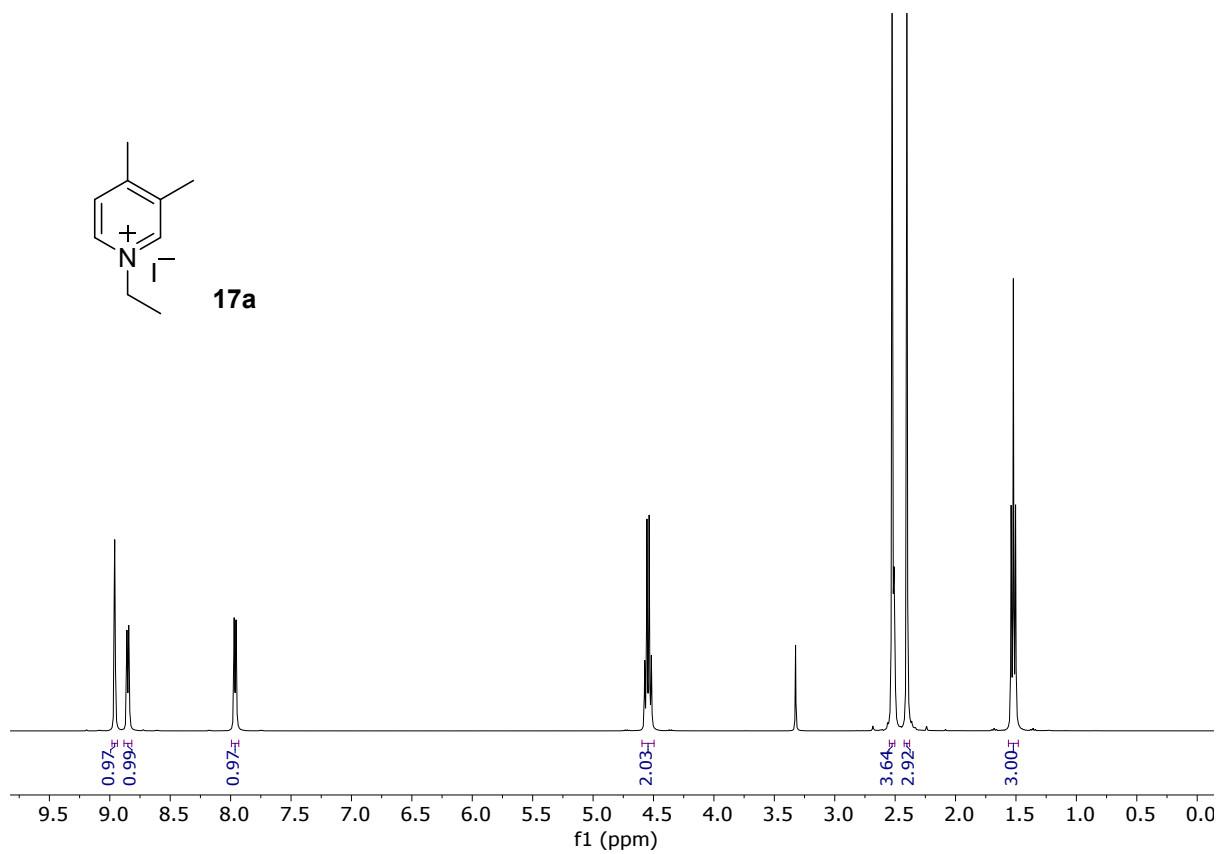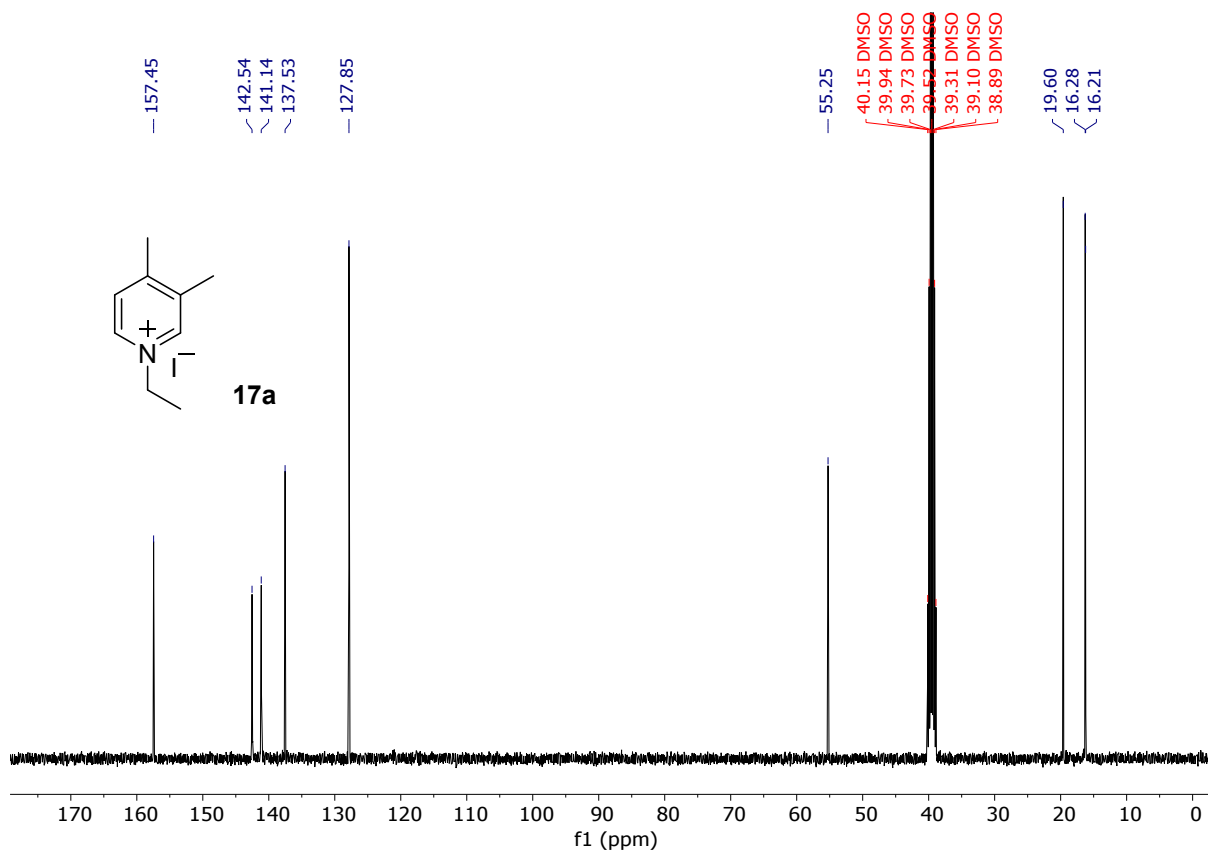

**<sup>1</sup>H & <sup>13</sup>C NMR spectra for 2-ethyl-5,6,7,8-tetrahydroisoquinolinium iodide (18a)**

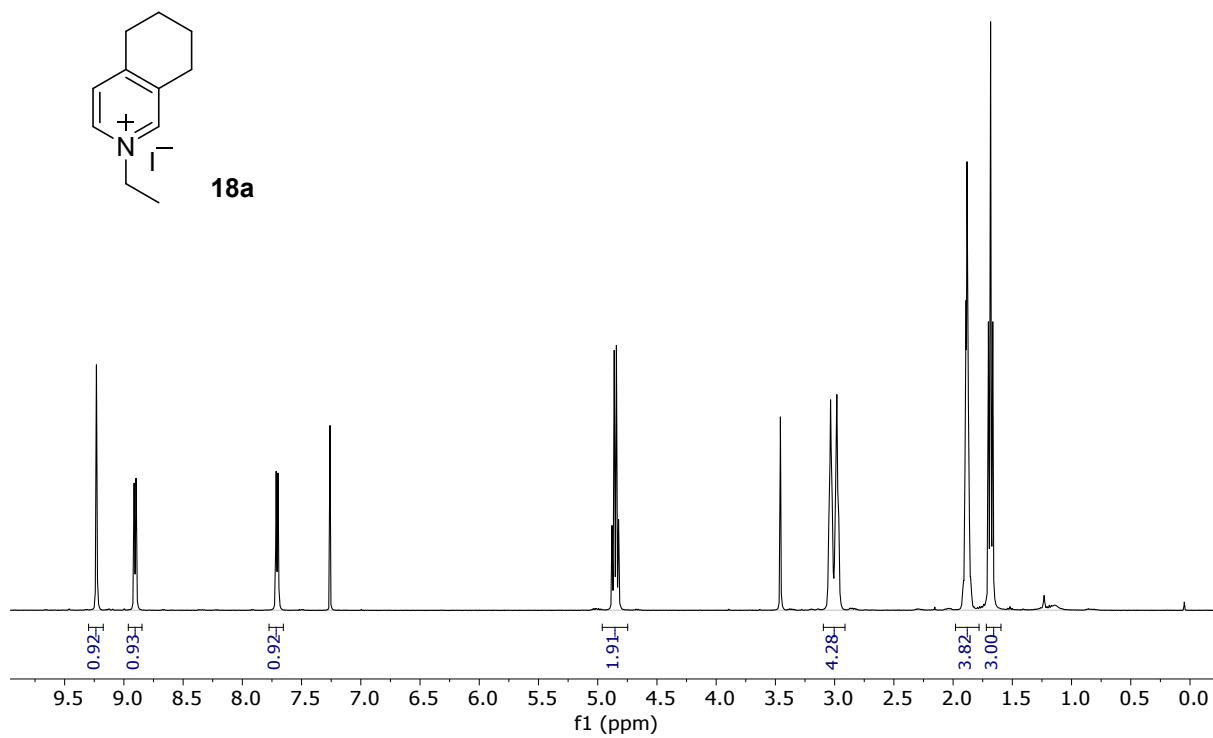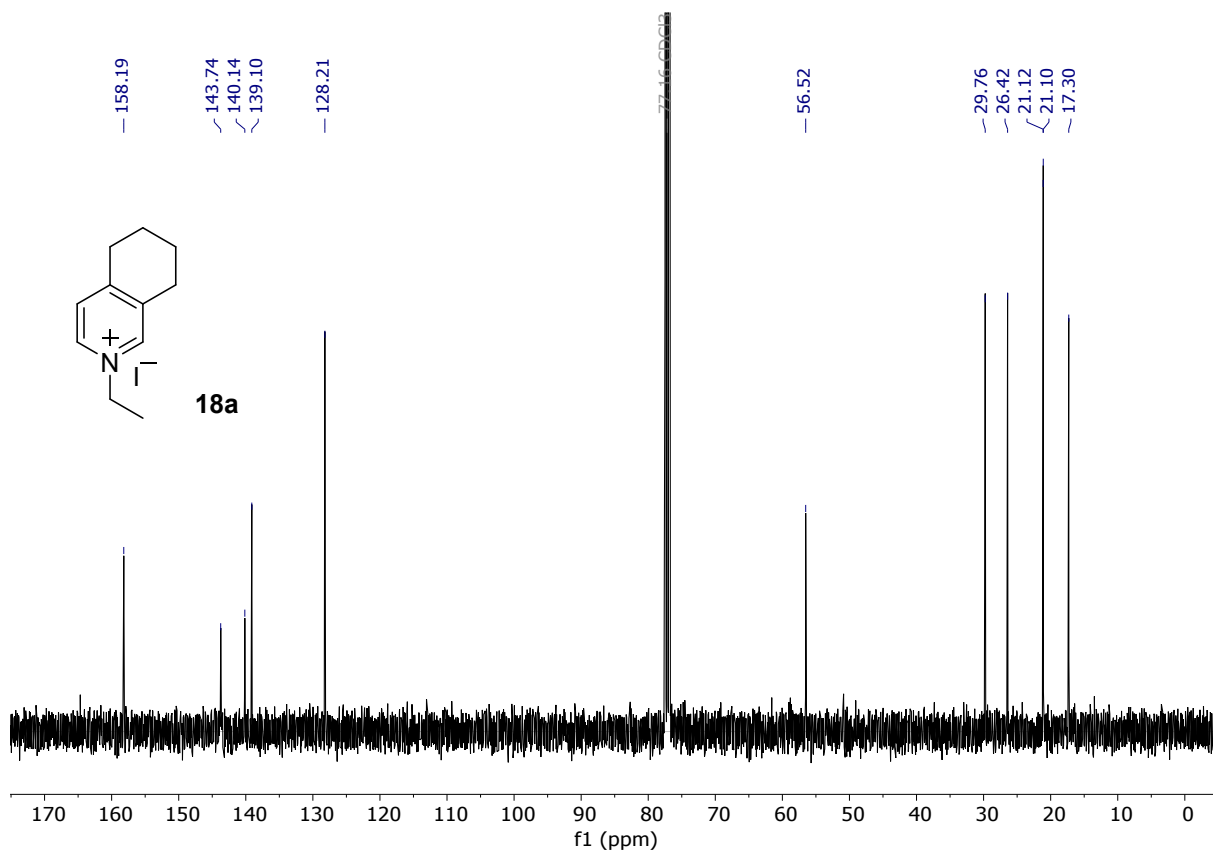

**<sup>1</sup>H & <sup>13</sup>C NMR spectra for 1-ethyl-4-methyl-3-phenylpyridinium iodide (19a)**

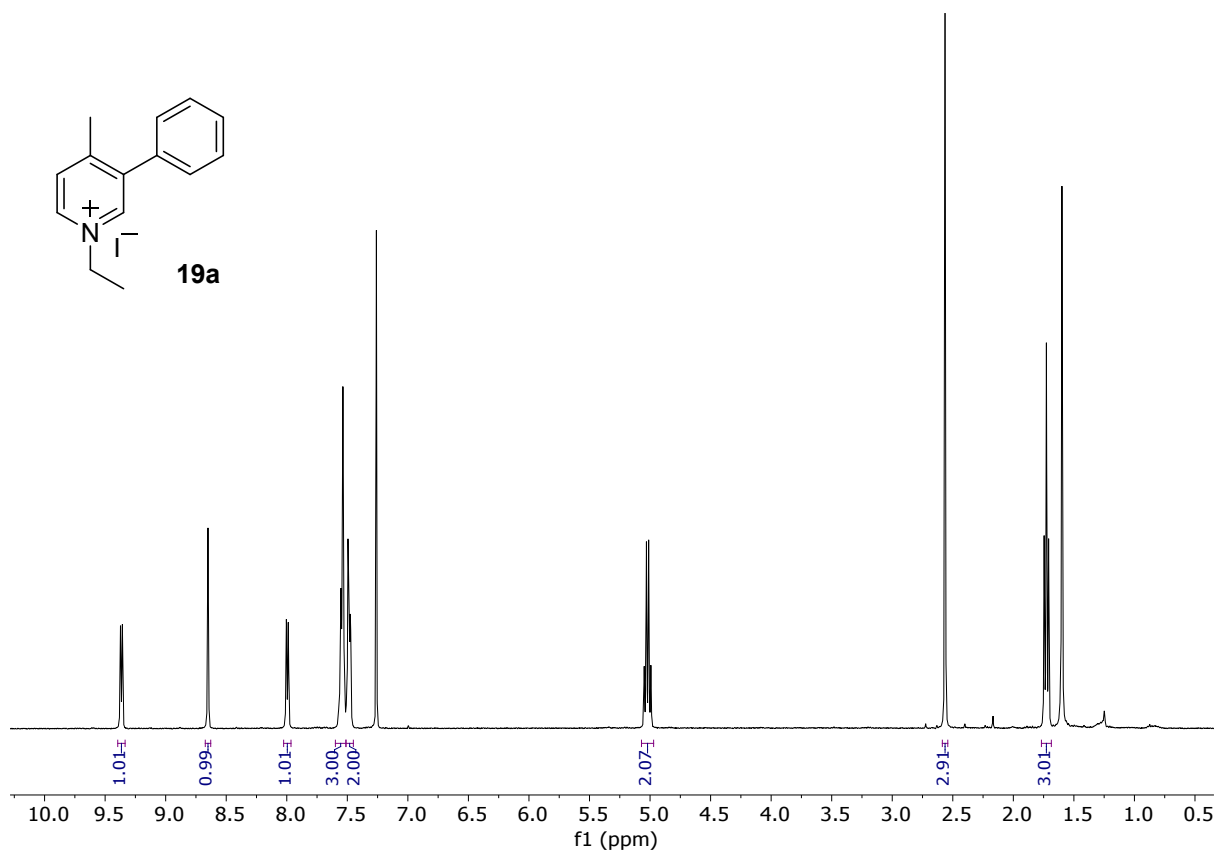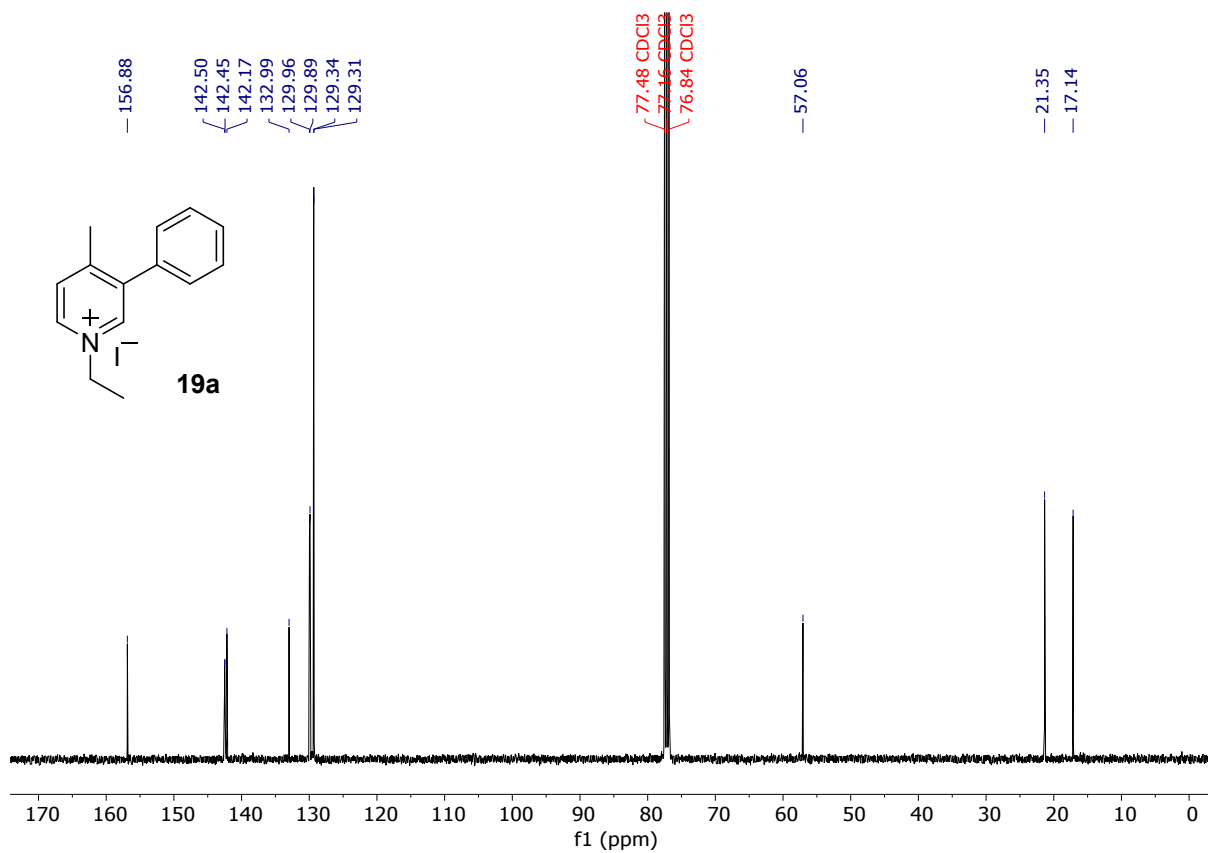

**<sup>1</sup>H & <sup>13</sup>C NMR spectra for 1-allyl-4-methyl-3-phenylpyridinium bromide (20a)**

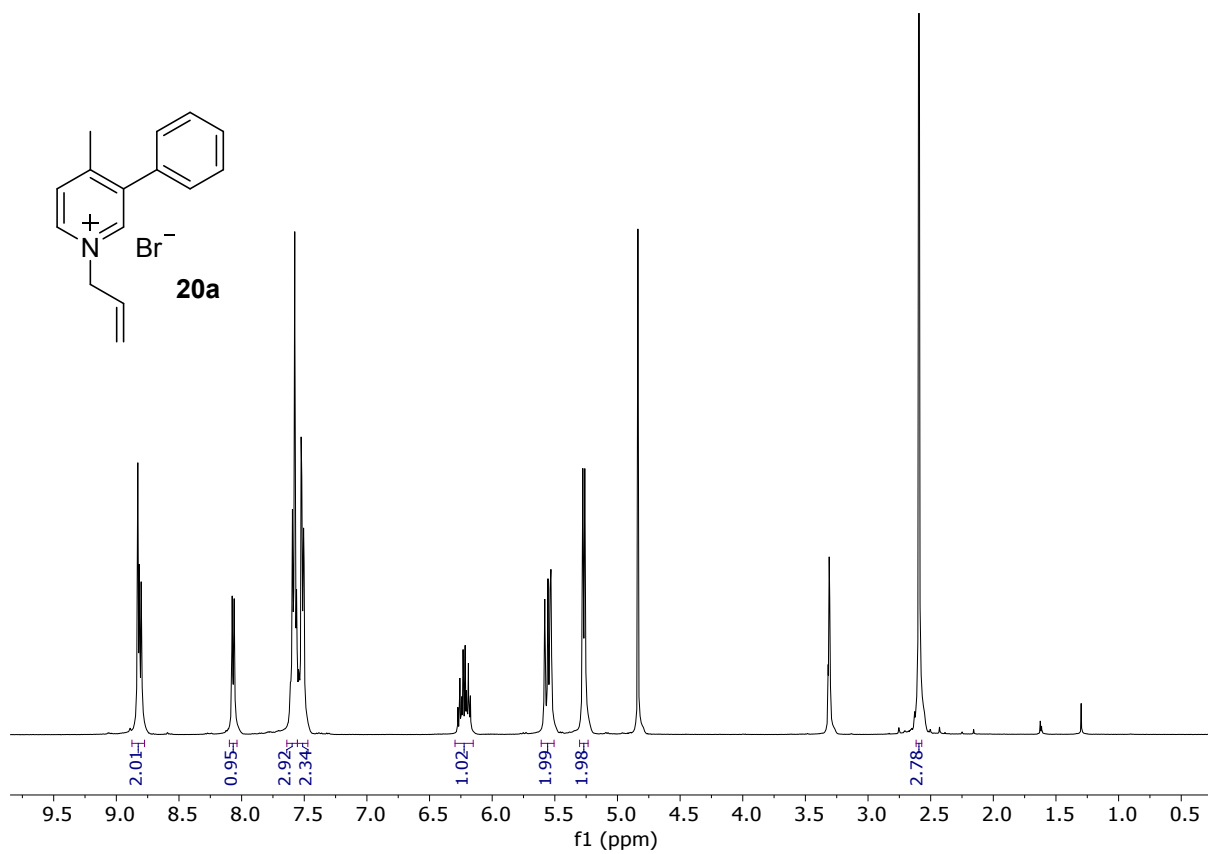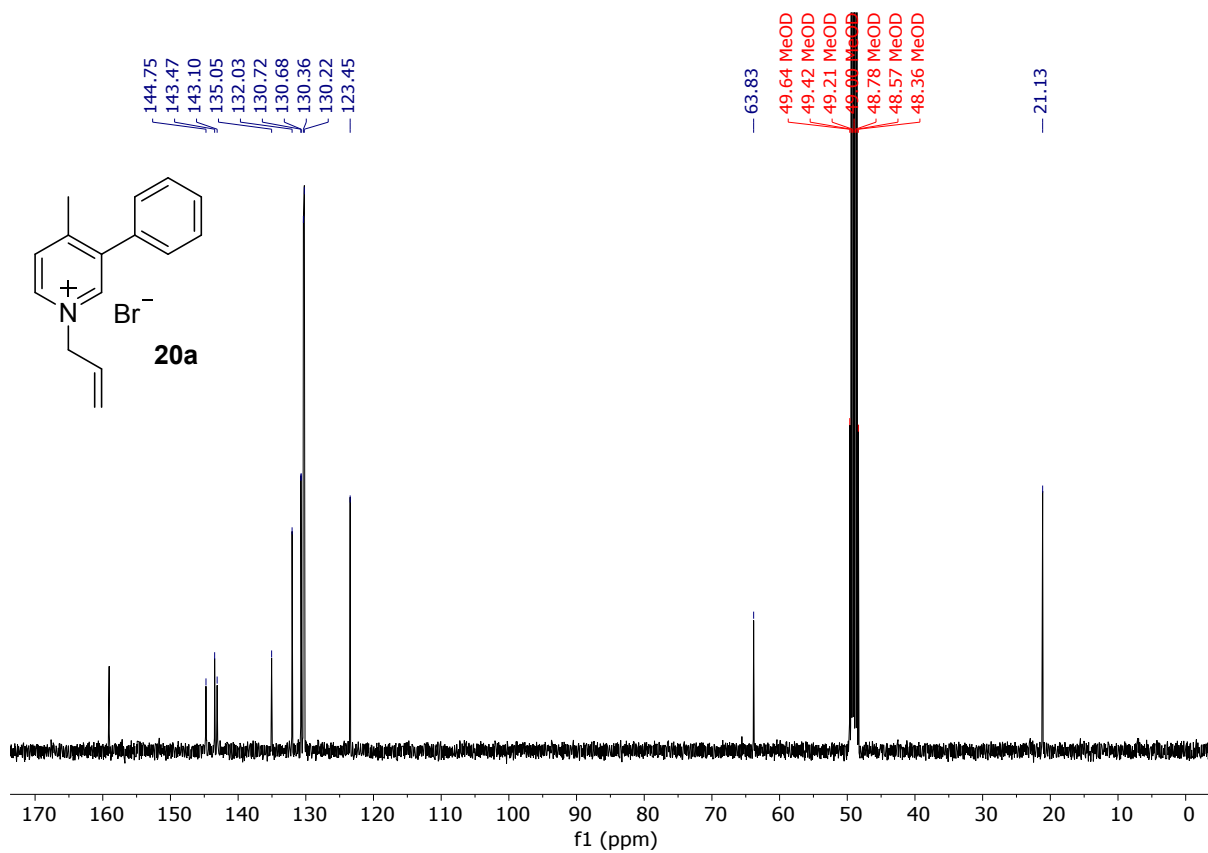

**<sup>1</sup>H & <sup>13</sup>C NMR spectra for 1-allyl-3-methyl-4-phenylpyridinium bromide (Crude-21a)**

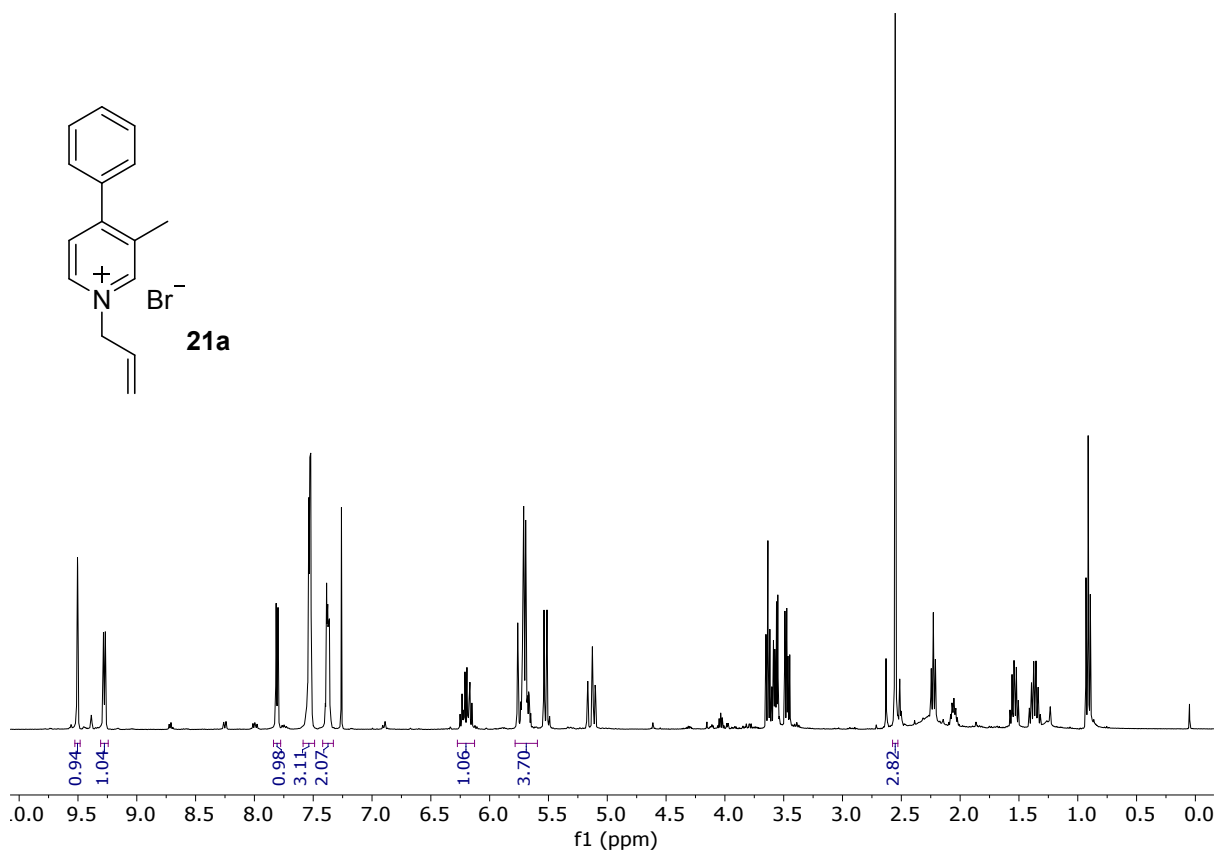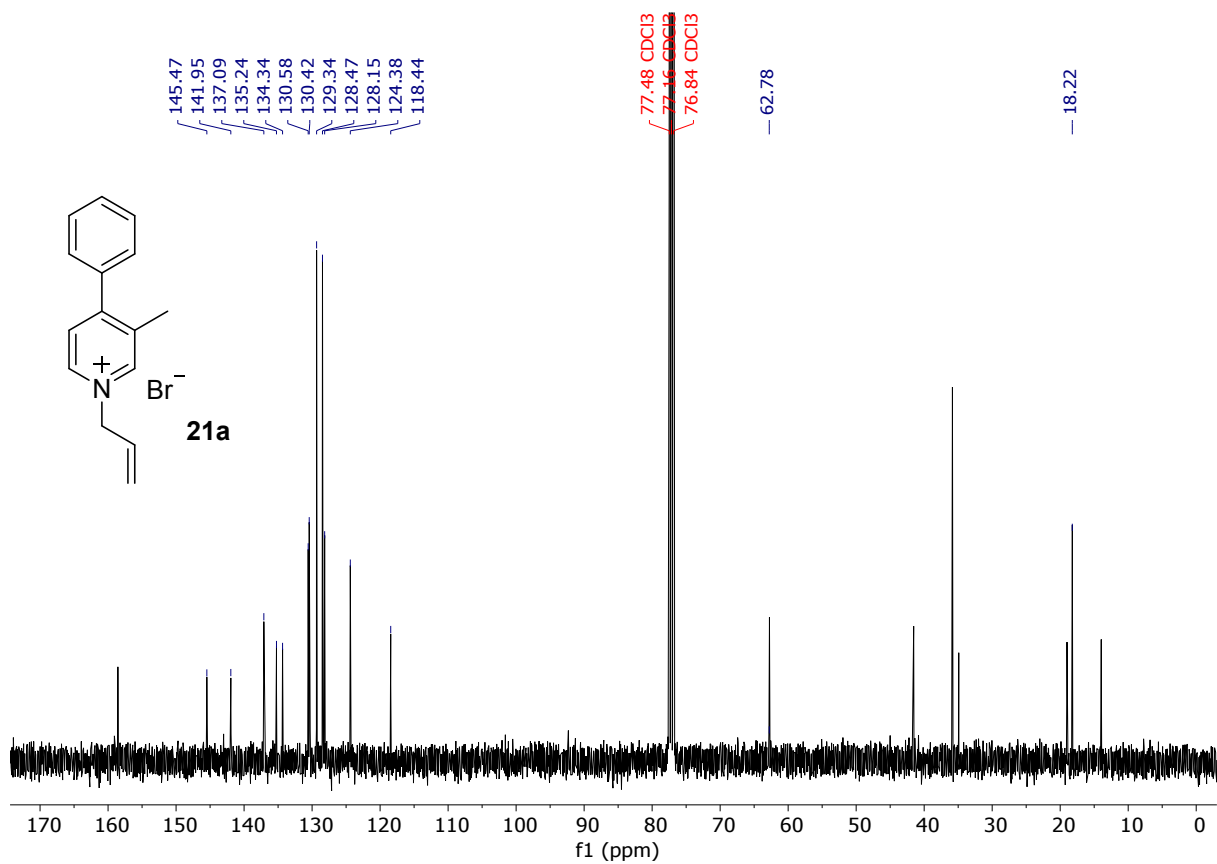



**<sup>1</sup>H & <sup>13</sup>C NMR spectra for 5-(3-methoxyphenyl)-1-propyl-1,2,3,6-THP (1b)**

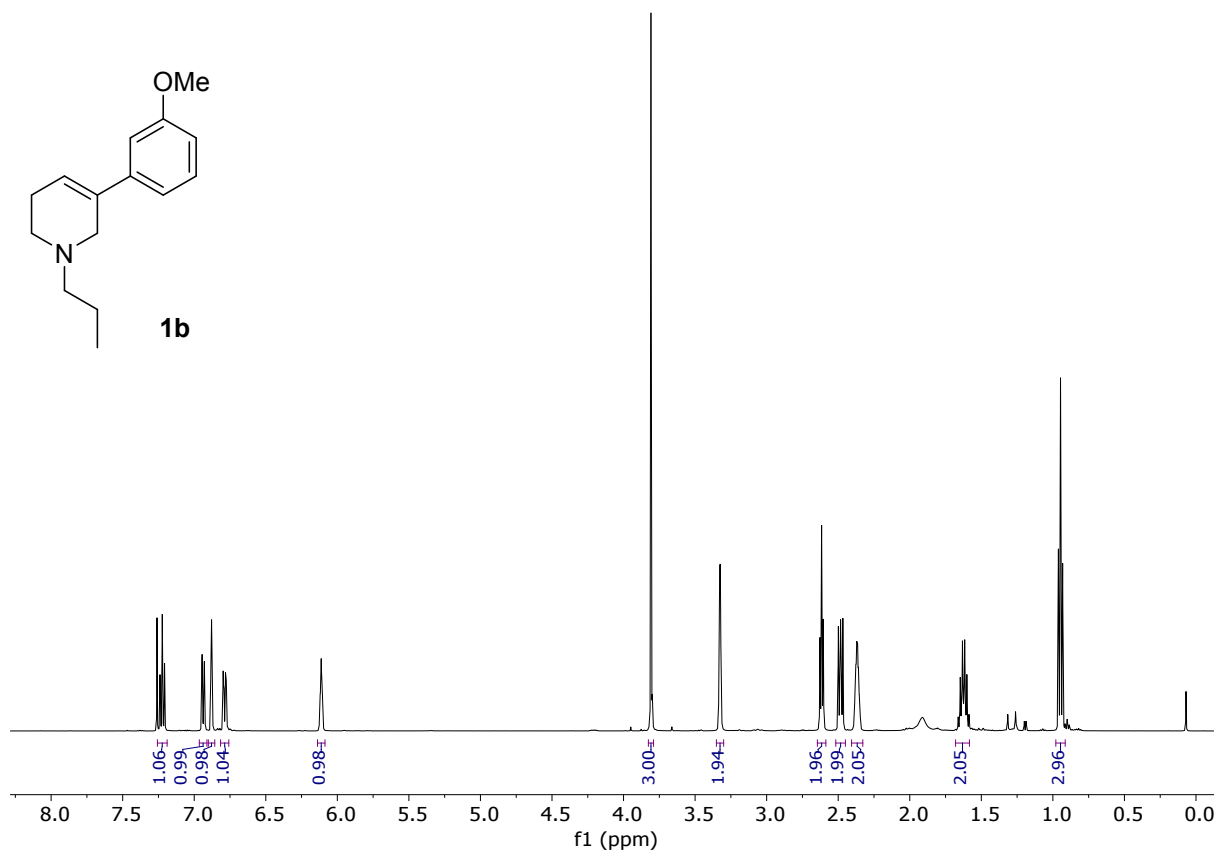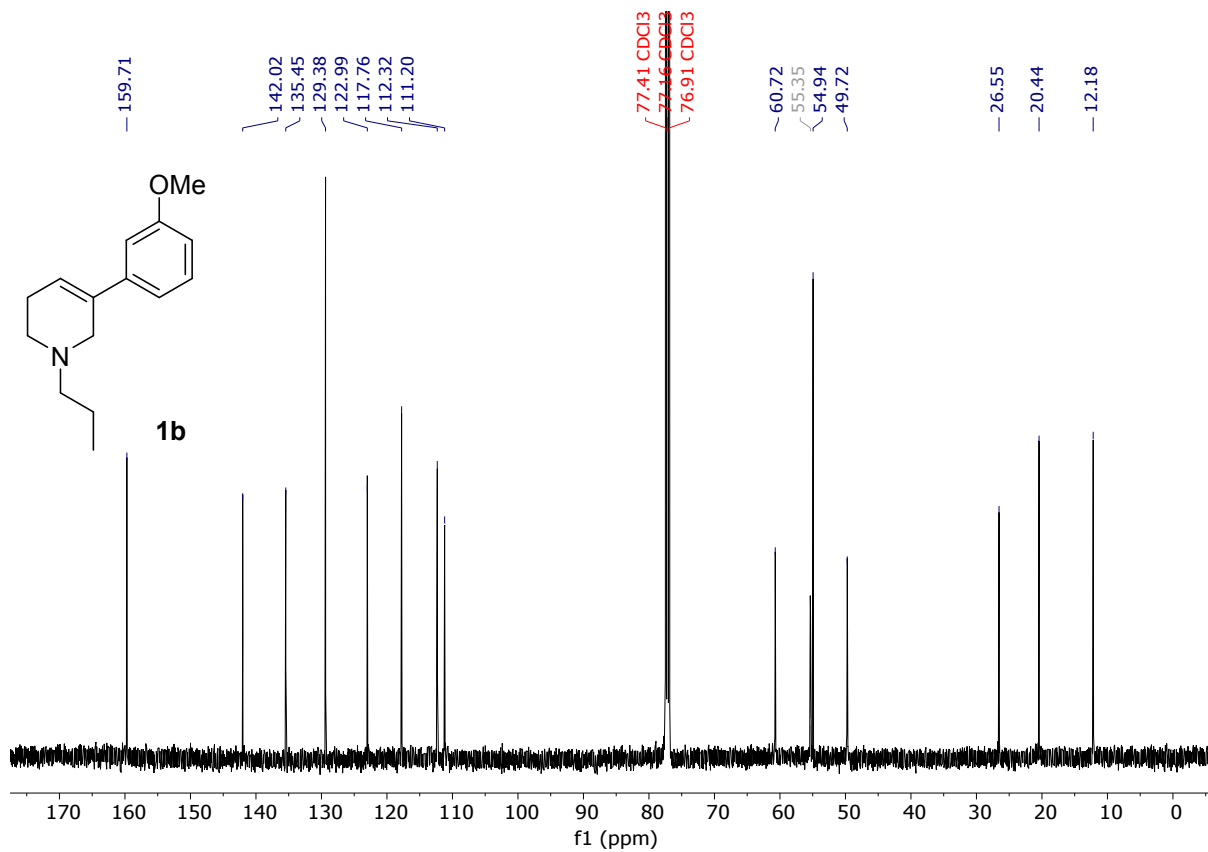

**<sup>1</sup>H & <sup>13</sup>C NMR spectra for 3-(1-propyl-1,2,5,6-tetrahydropyridin-3-yl)phenol**

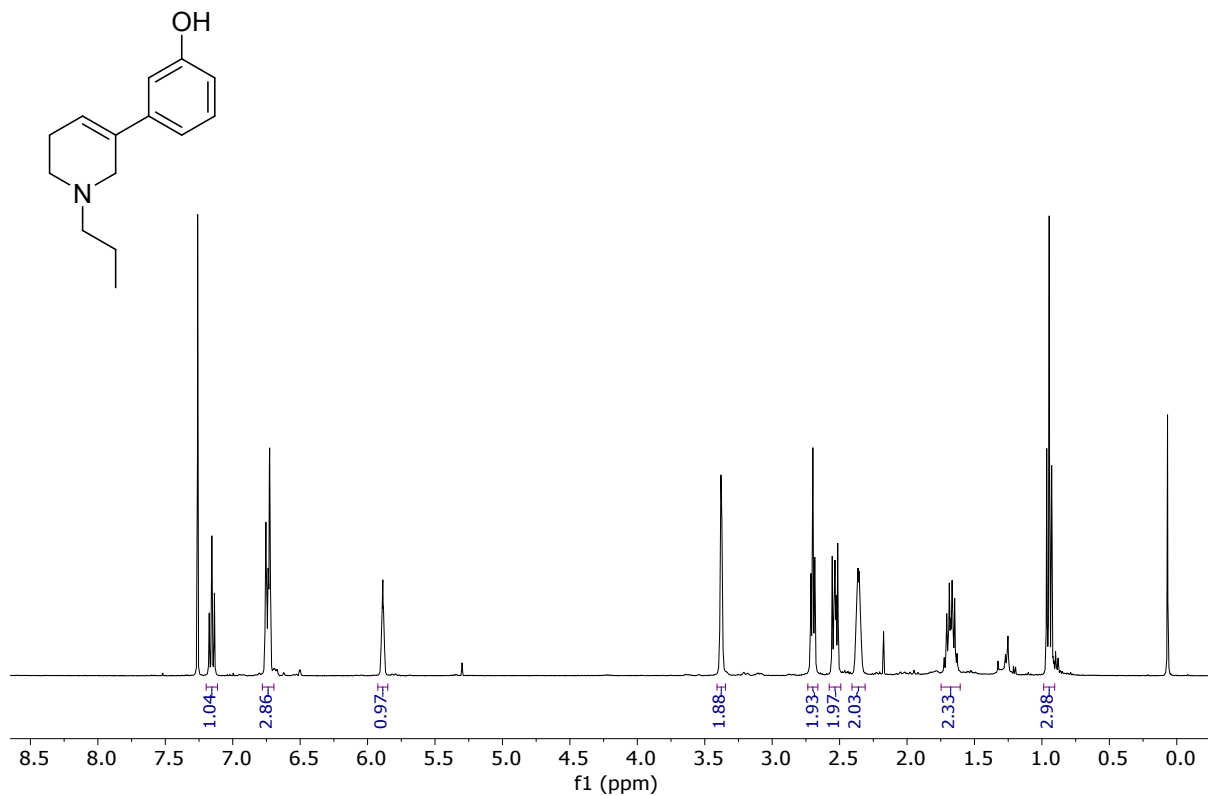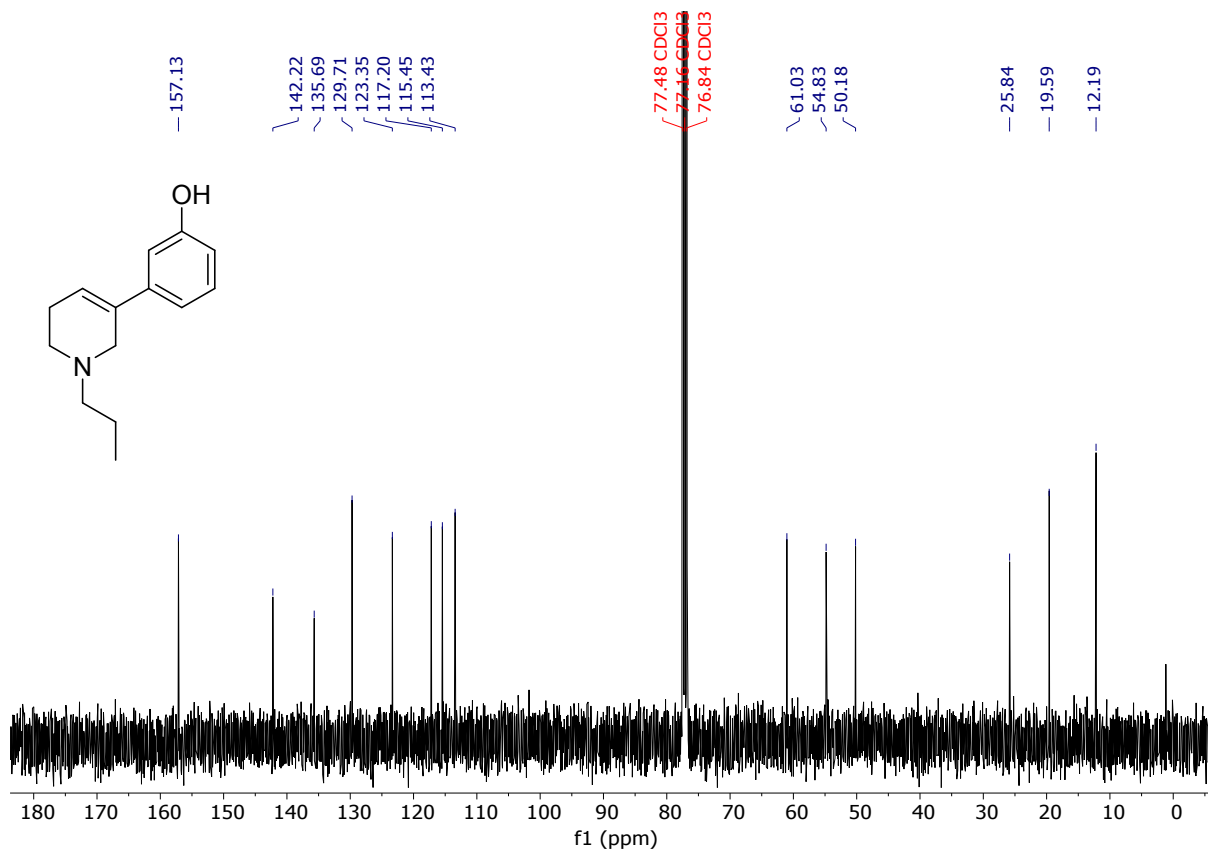

**<sup>1</sup>H & <sup>13</sup>C NMR spectra for 5-(3-(methylsulfonyl)phenyl)-1-propyl-1,2,3,6-THP (2b)**

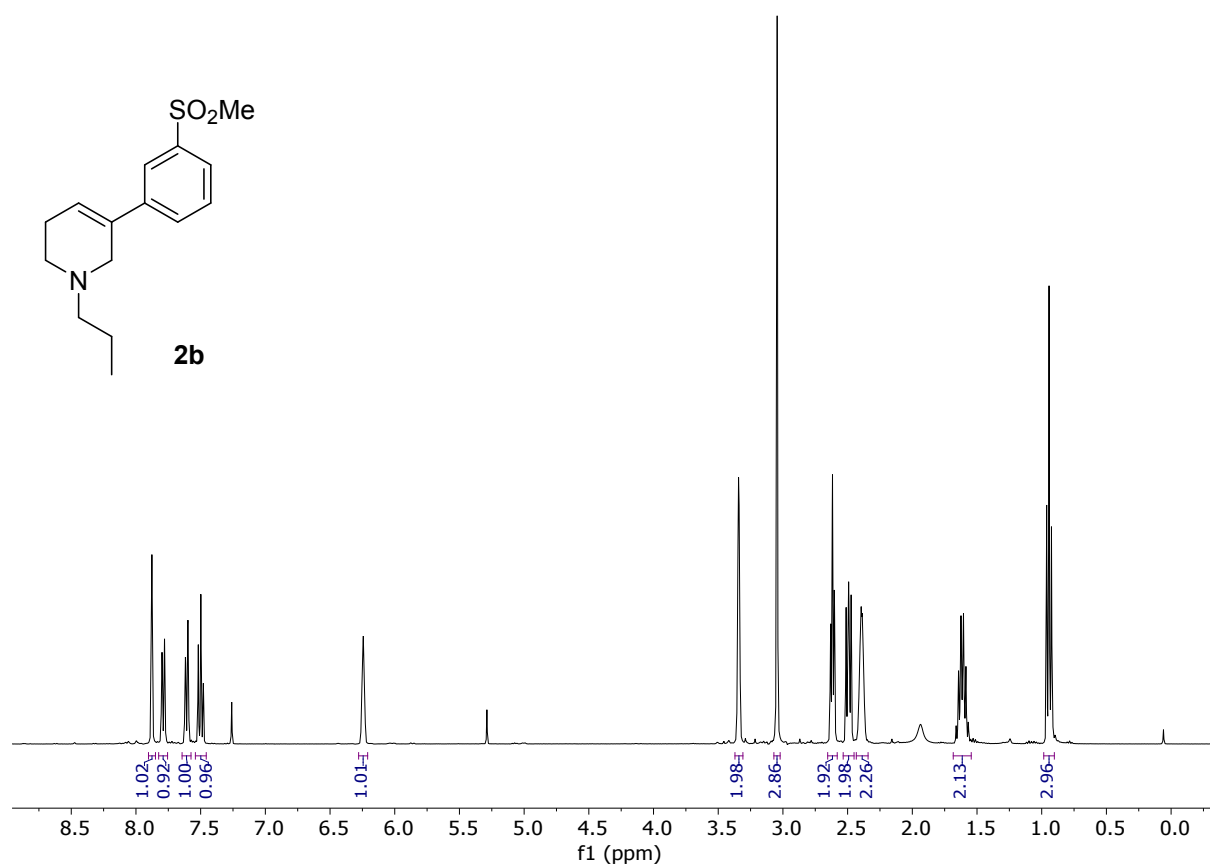

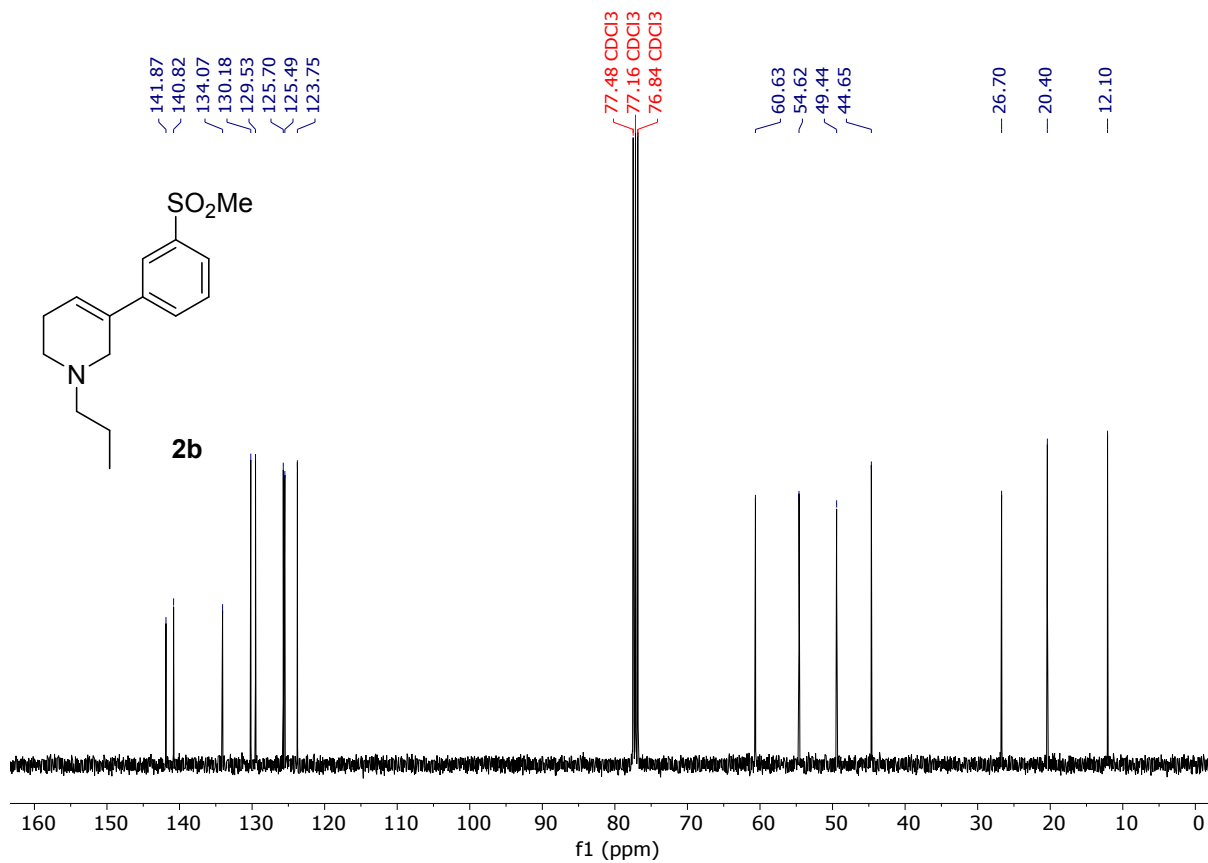

<sup>1</sup>H & <sup>13</sup>C NMR spectra for 1-allyl-5-(4-bromophenyl)-1,2,3,6-THP (**3b**)

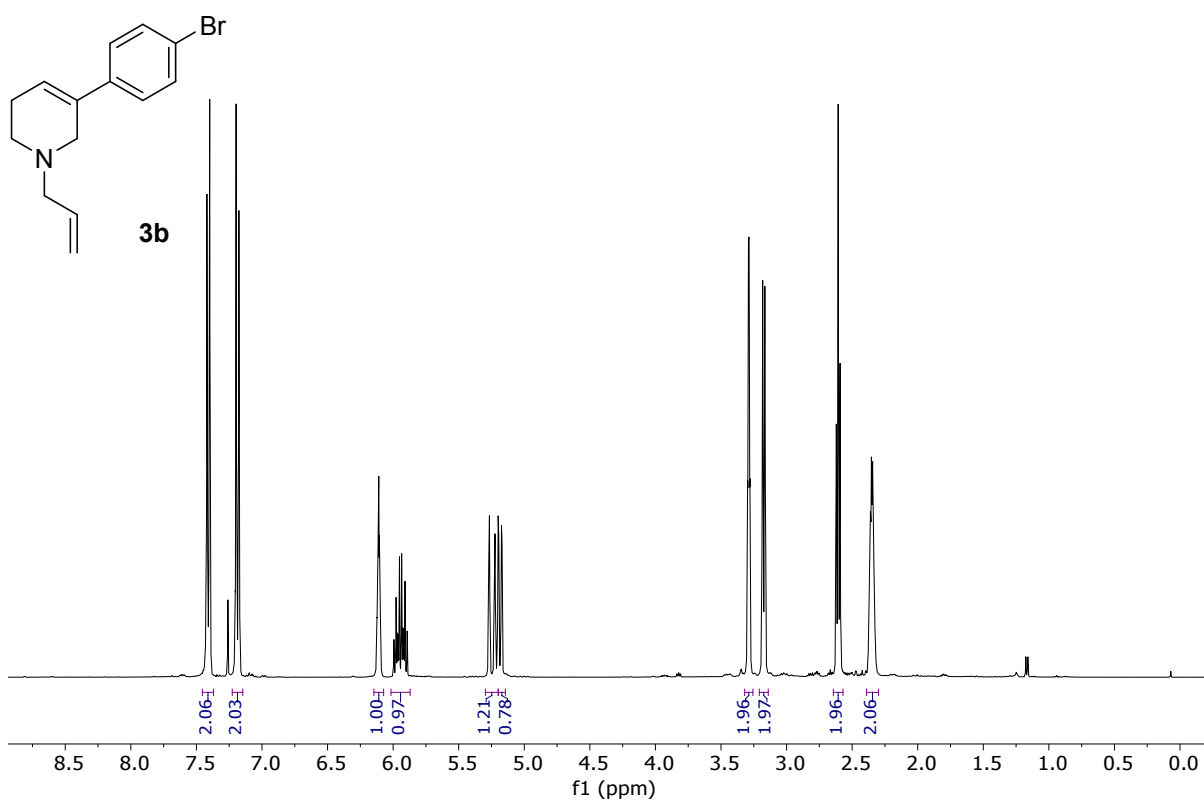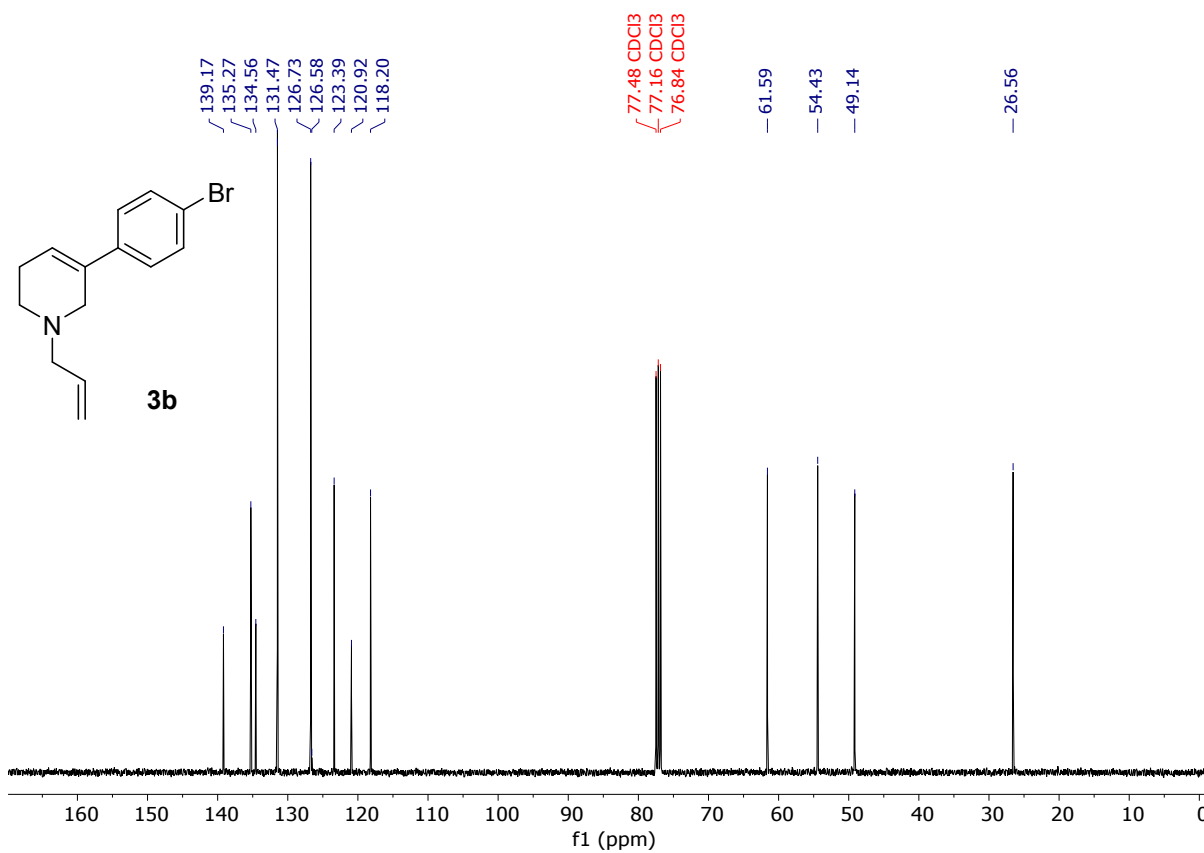

**<sup>1</sup>H & <sup>13</sup>C NMR spectra for *N*-(4-(1-allyl-1,2,5,6-tetrahydropyridin-3-yl)phenyl)acetamide**

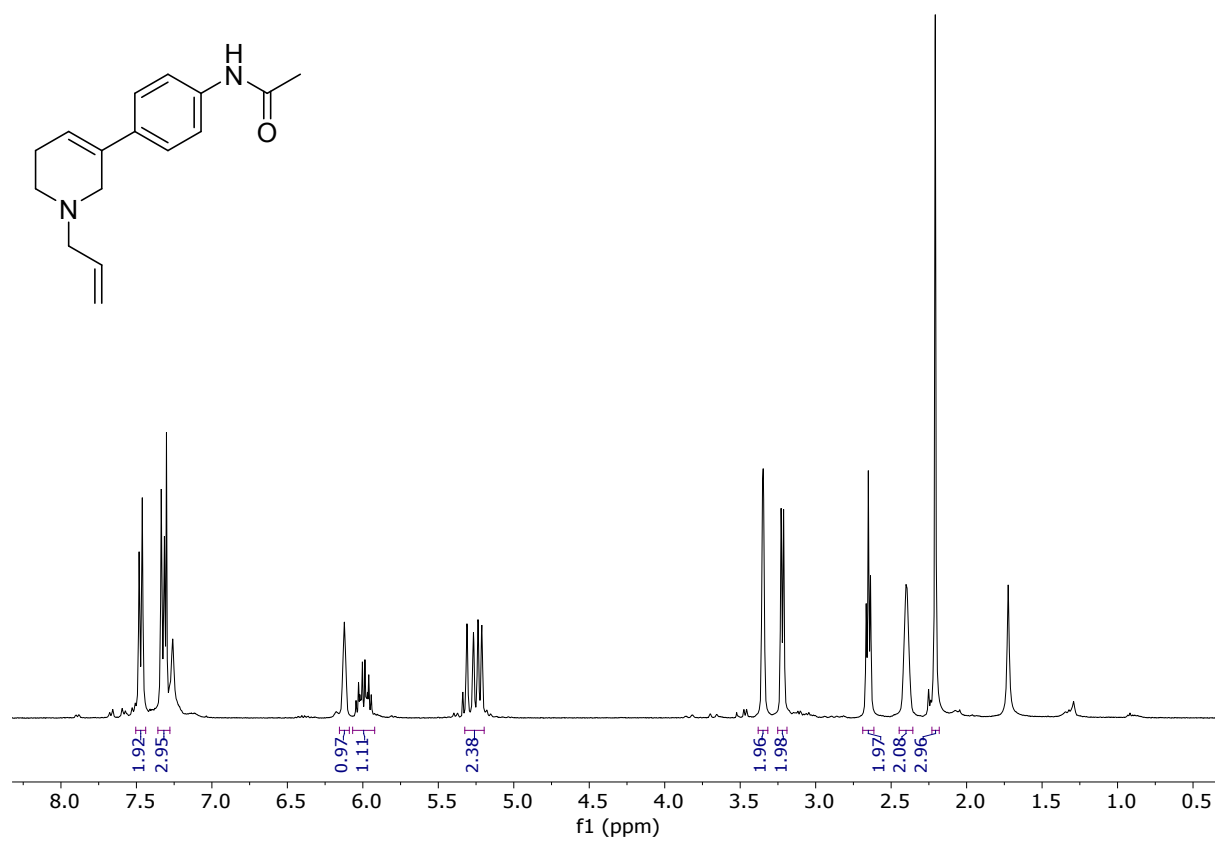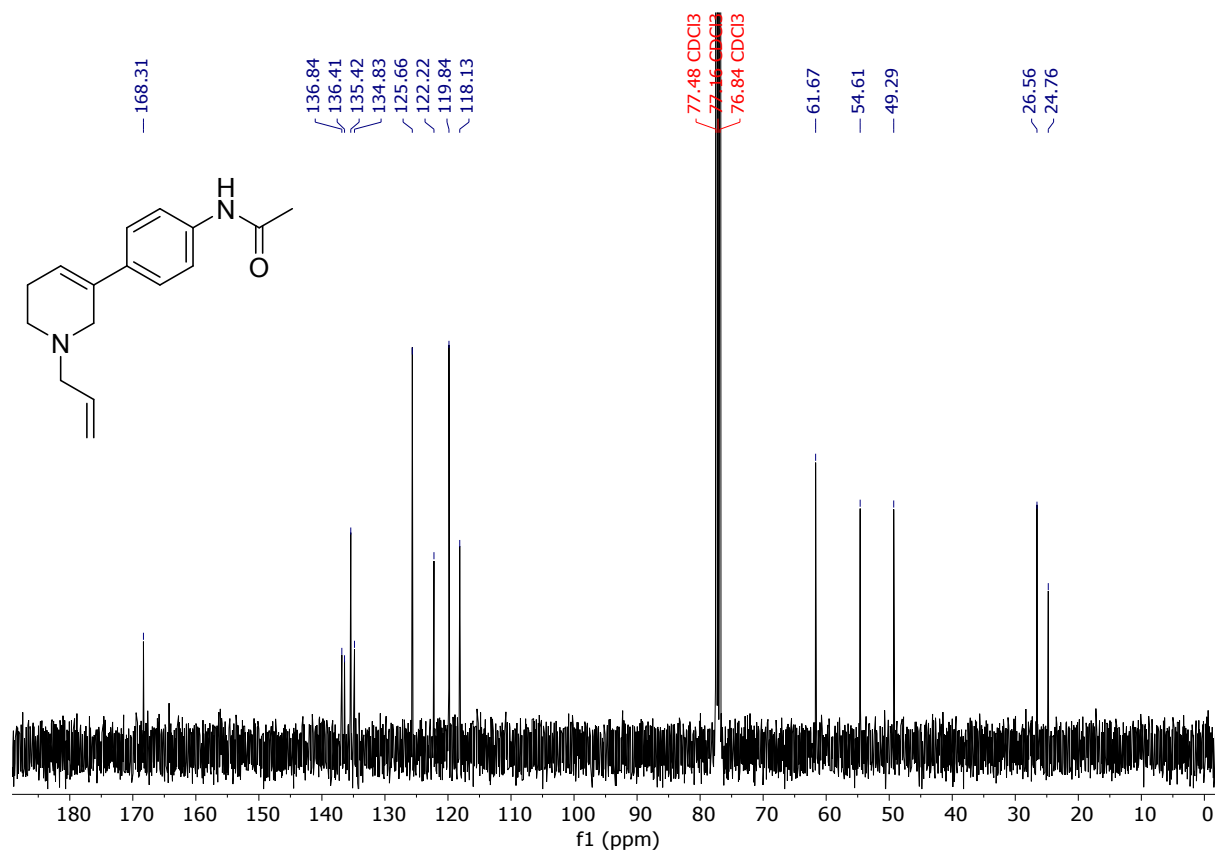

<sup>1</sup>H & <sup>13</sup>C NMR spectra for 4-(1-allyl-1,2,5,6-tetrahydropyridin-3-yl)aniline (4b)

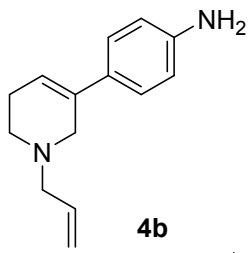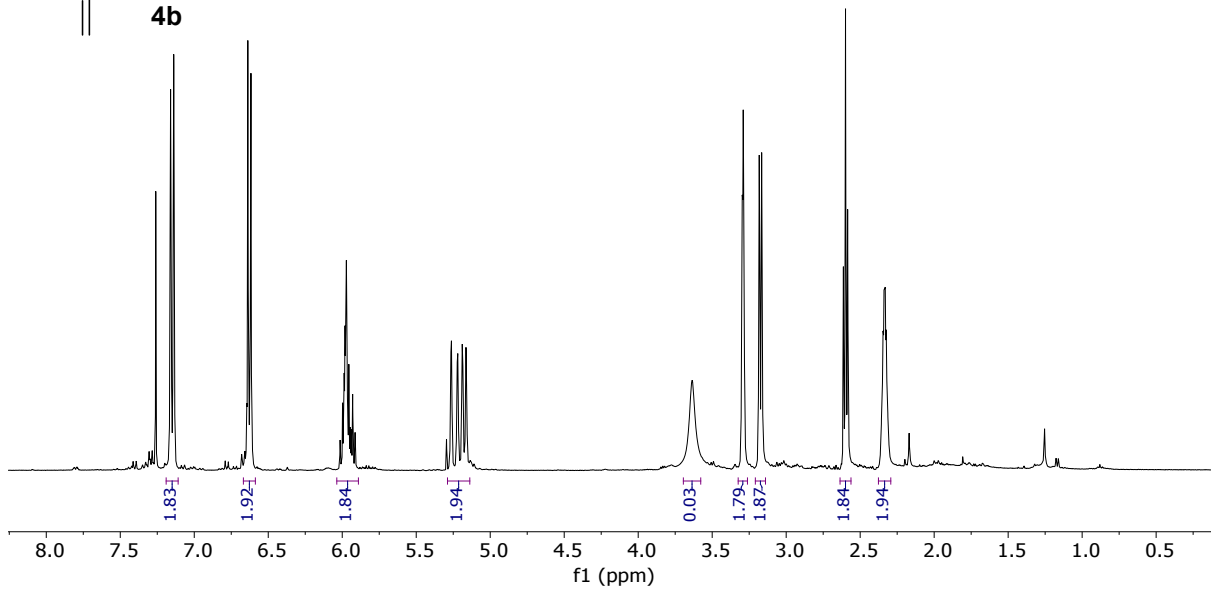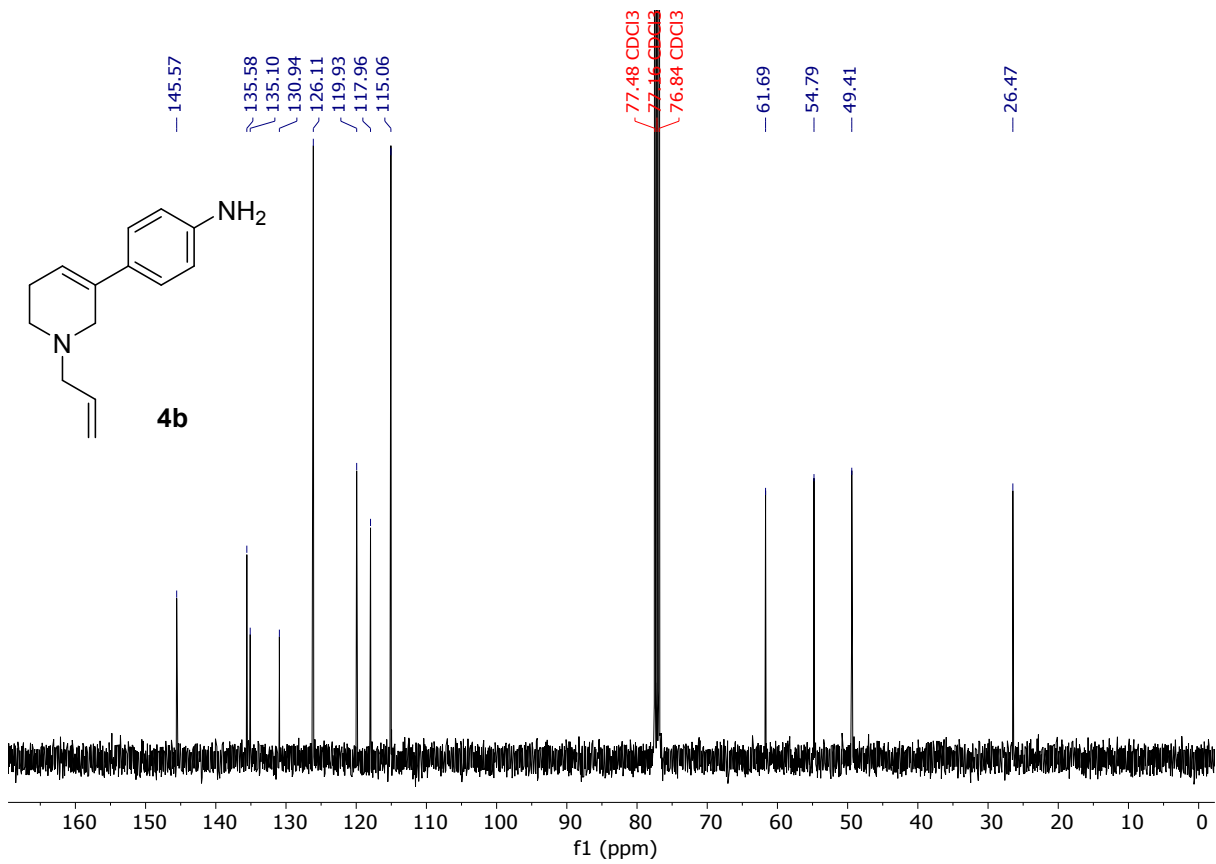

**<sup>1</sup>H & <sup>13</sup>C NMR spectra for 1-ethyl-5-phenyl-1,2,3,6-THP (5b)**

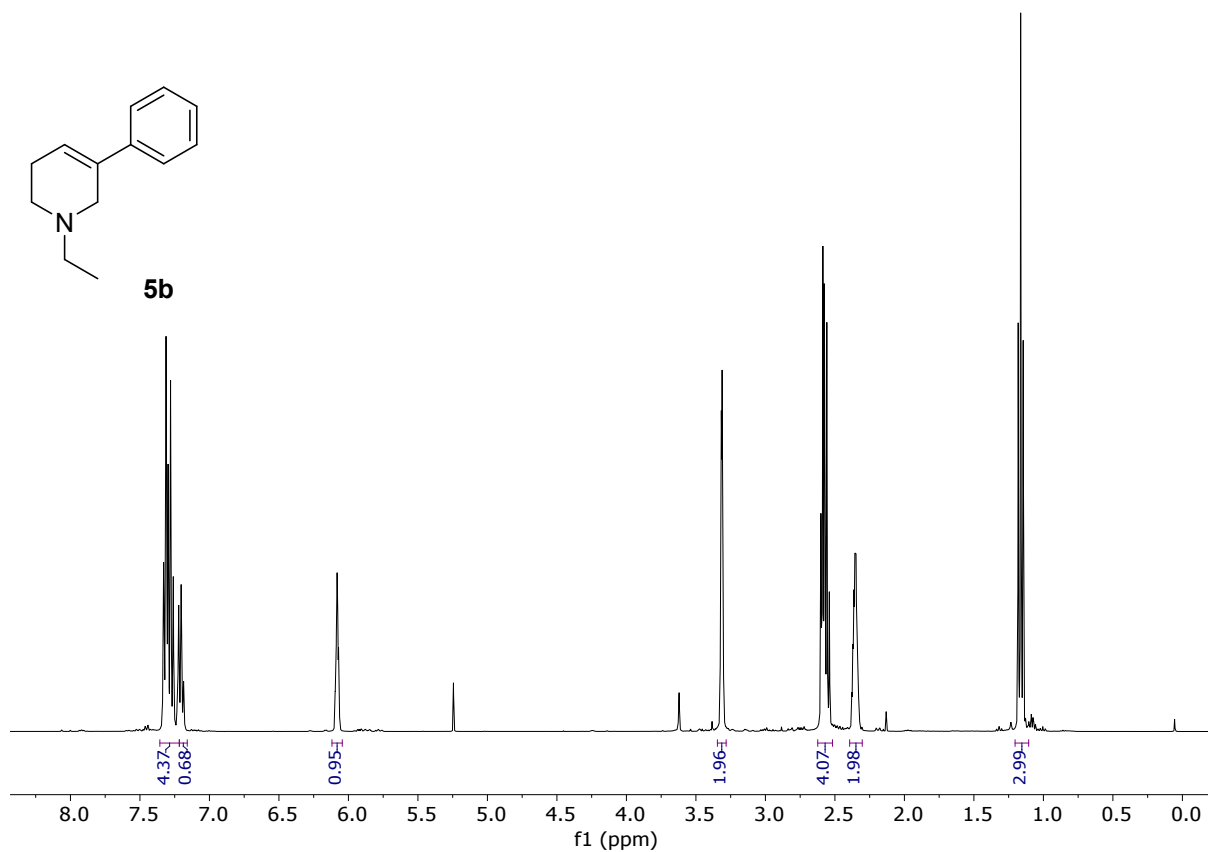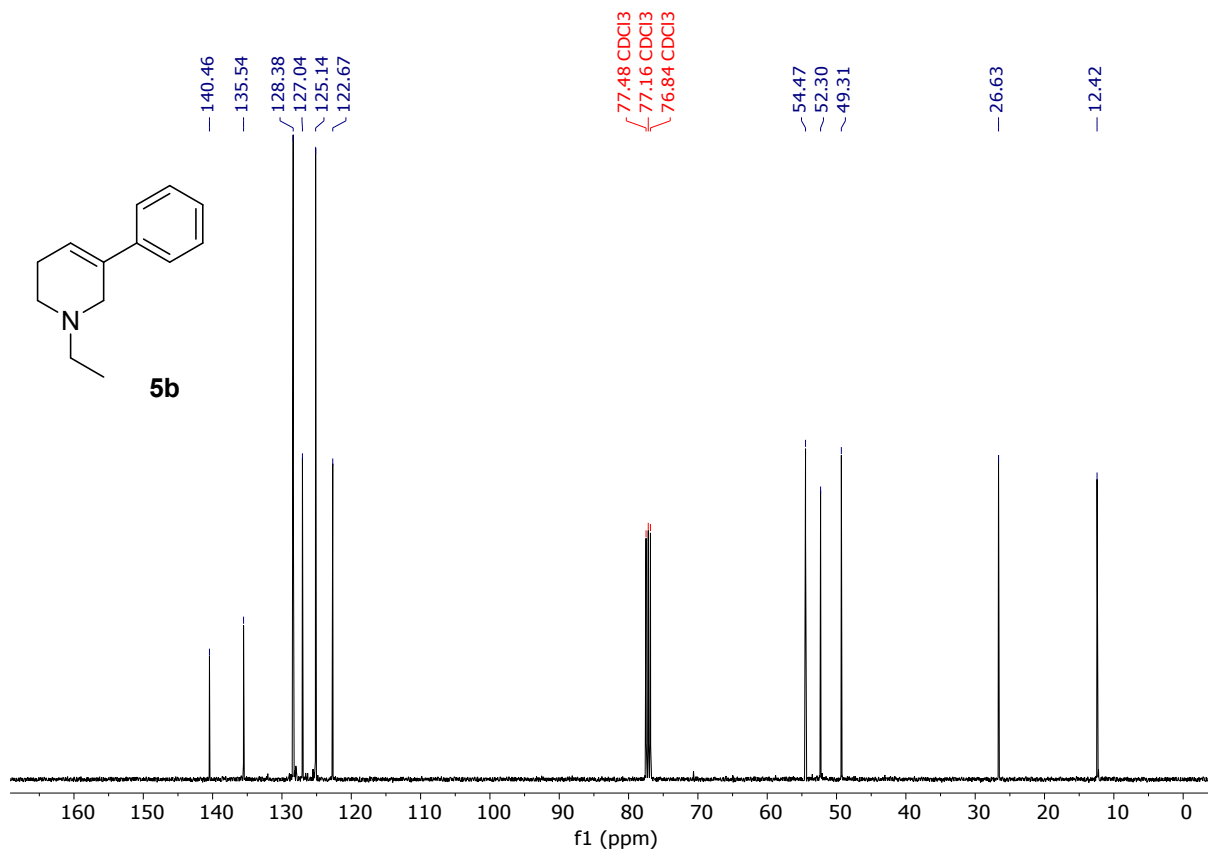



**<sup>1</sup>H & <sup>13</sup>C NMR spectra for 1-ethyl-5-(4-fluorophenyl)-1,2,3,6-THP (6b)**

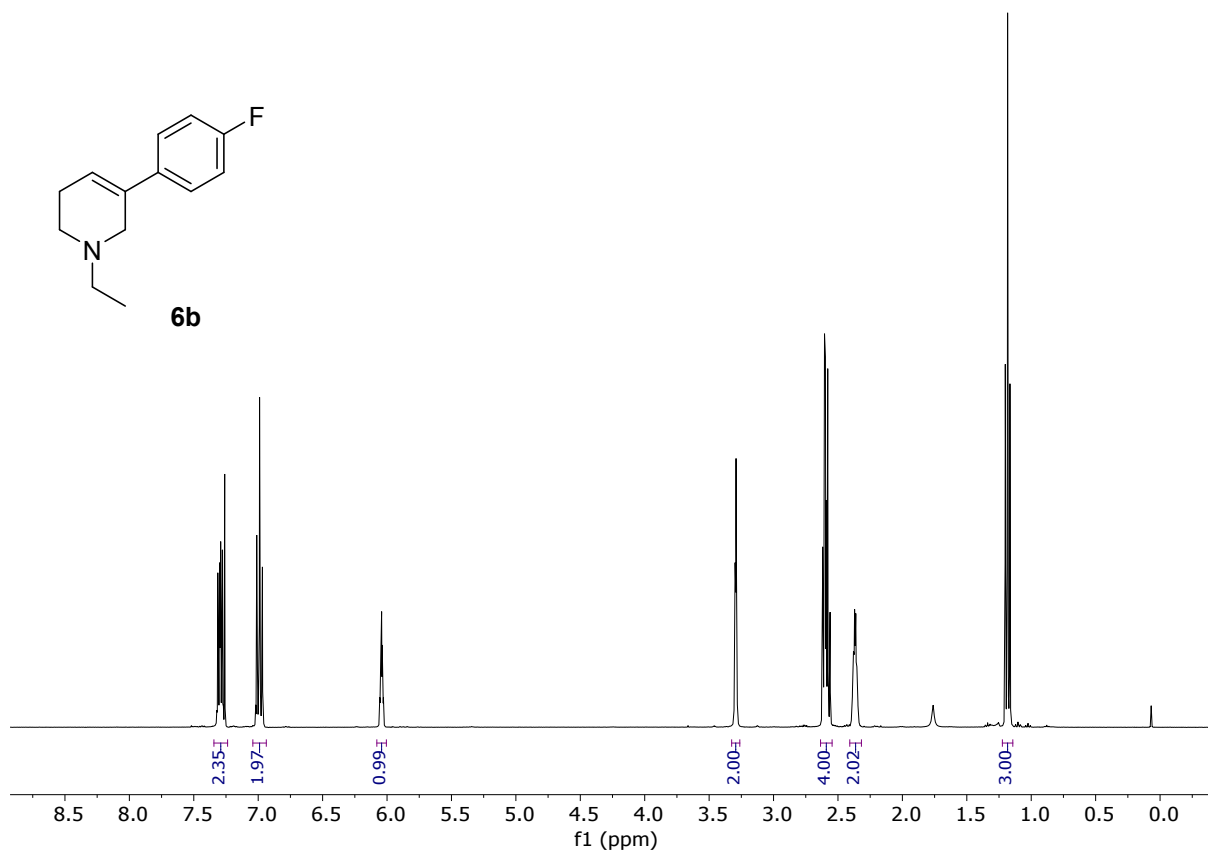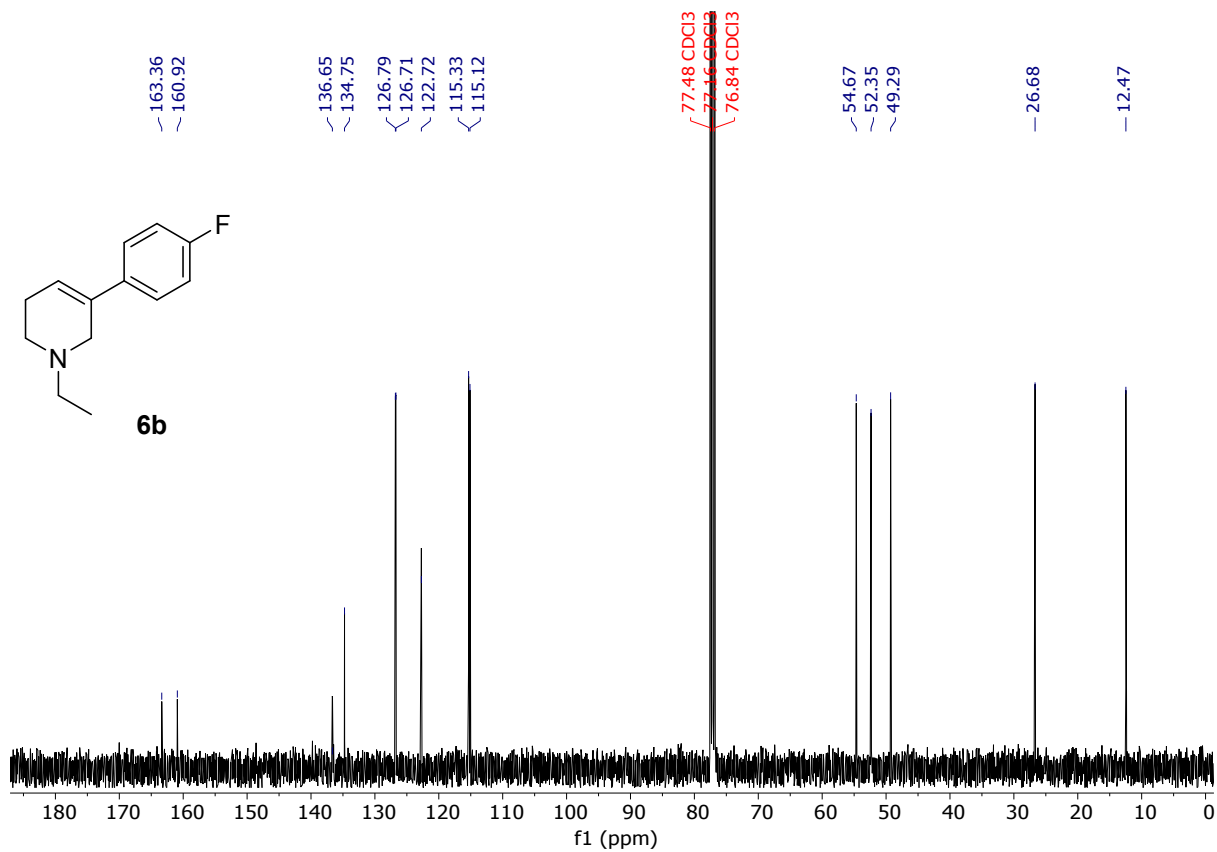

**<sup>1</sup>H & <sup>13</sup>C NMR spectra for 1-ethyl-5-(4-methoxyphenyl)-1,2,3,6-THP (7b)**

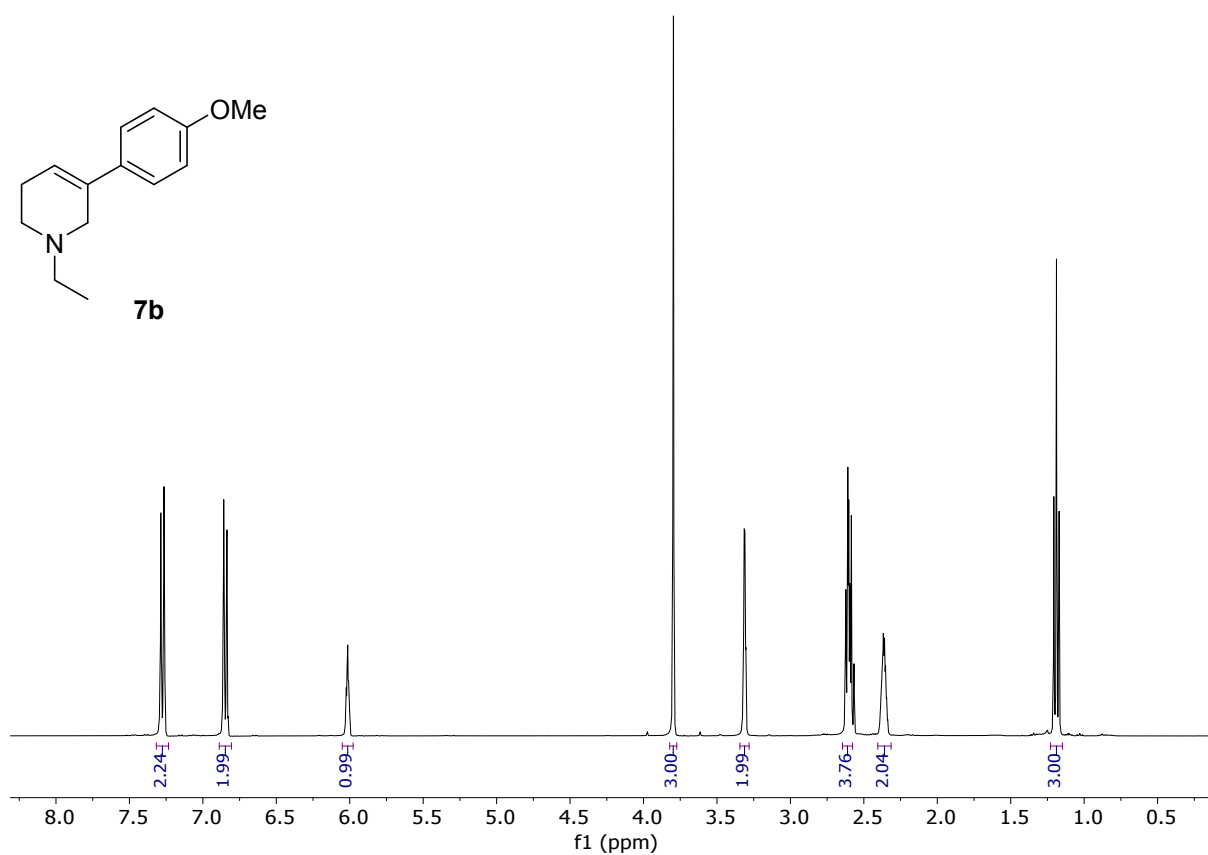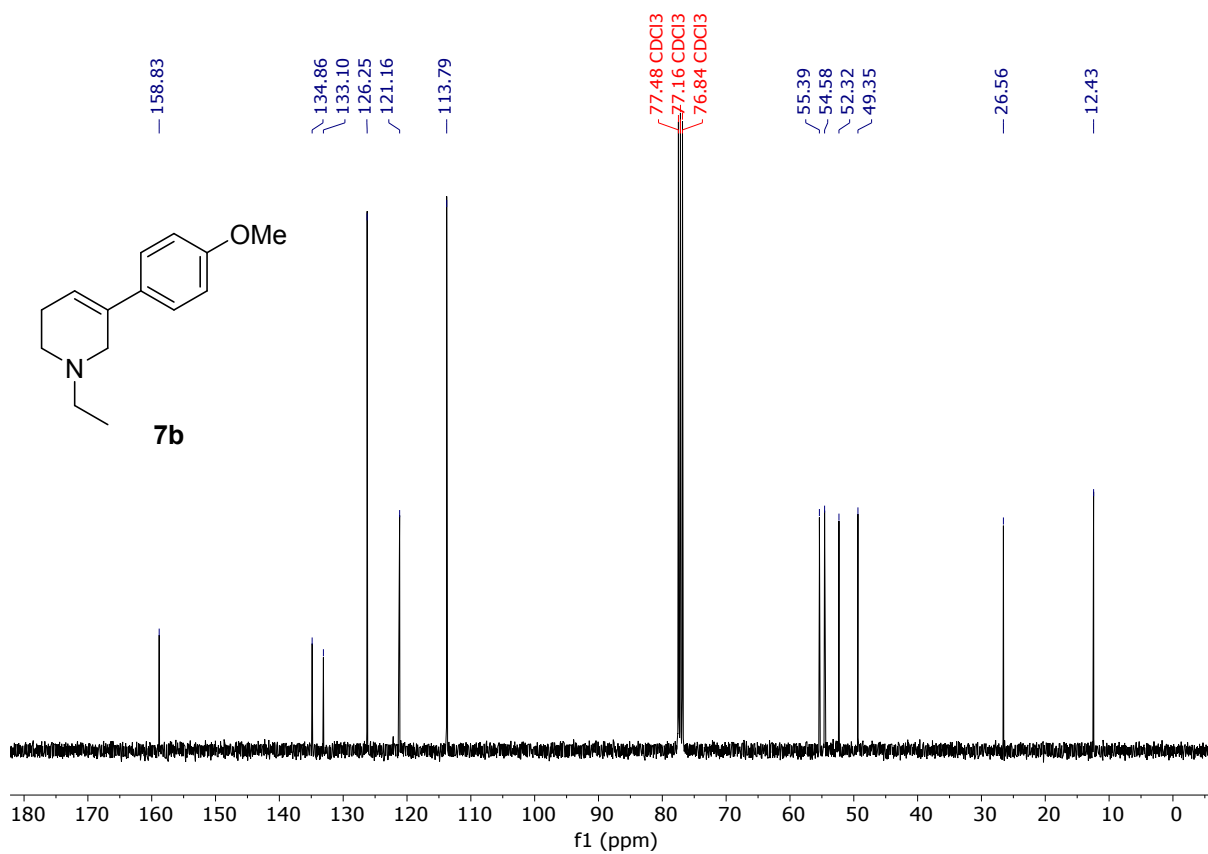

**<sup>1</sup>H & <sup>13</sup>C NMR spectra for 1-ethyl-5-(furan-2-yl)-1,2,3,6-THP (8b)**

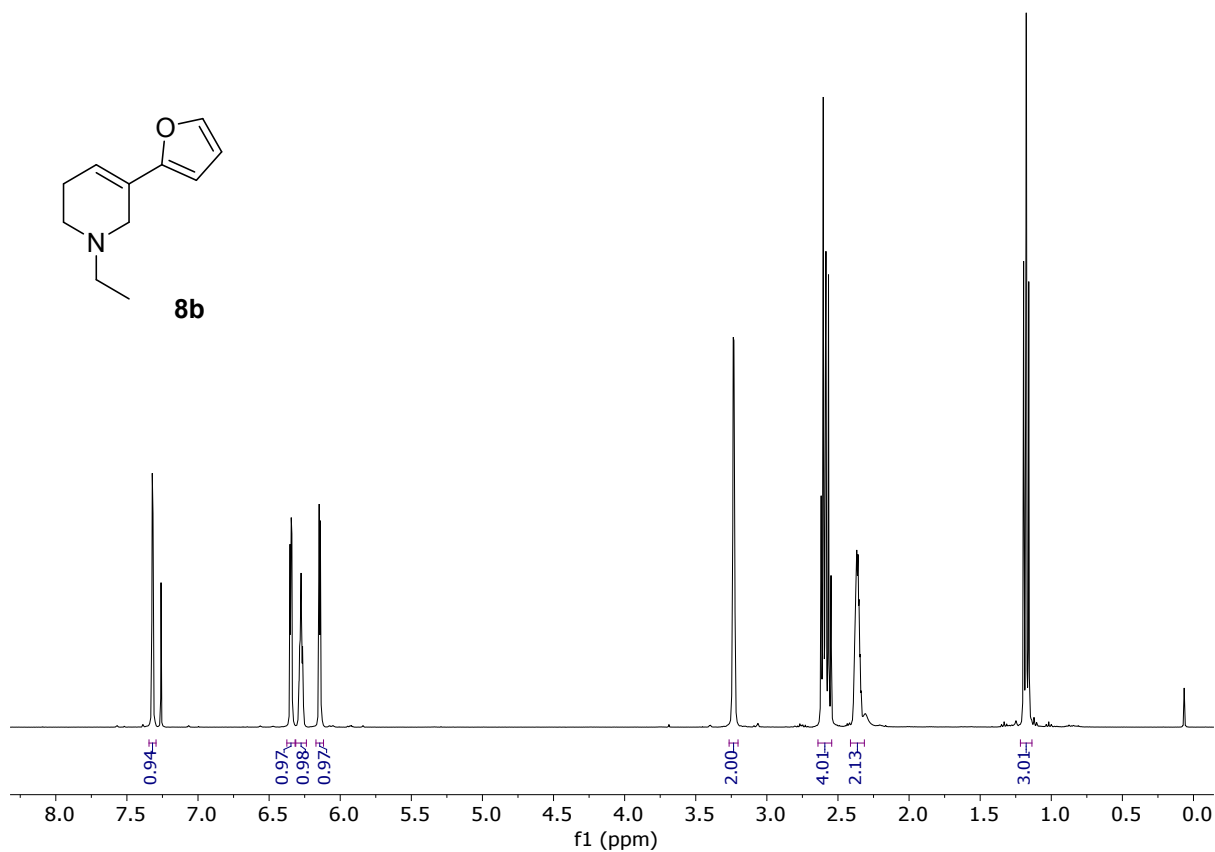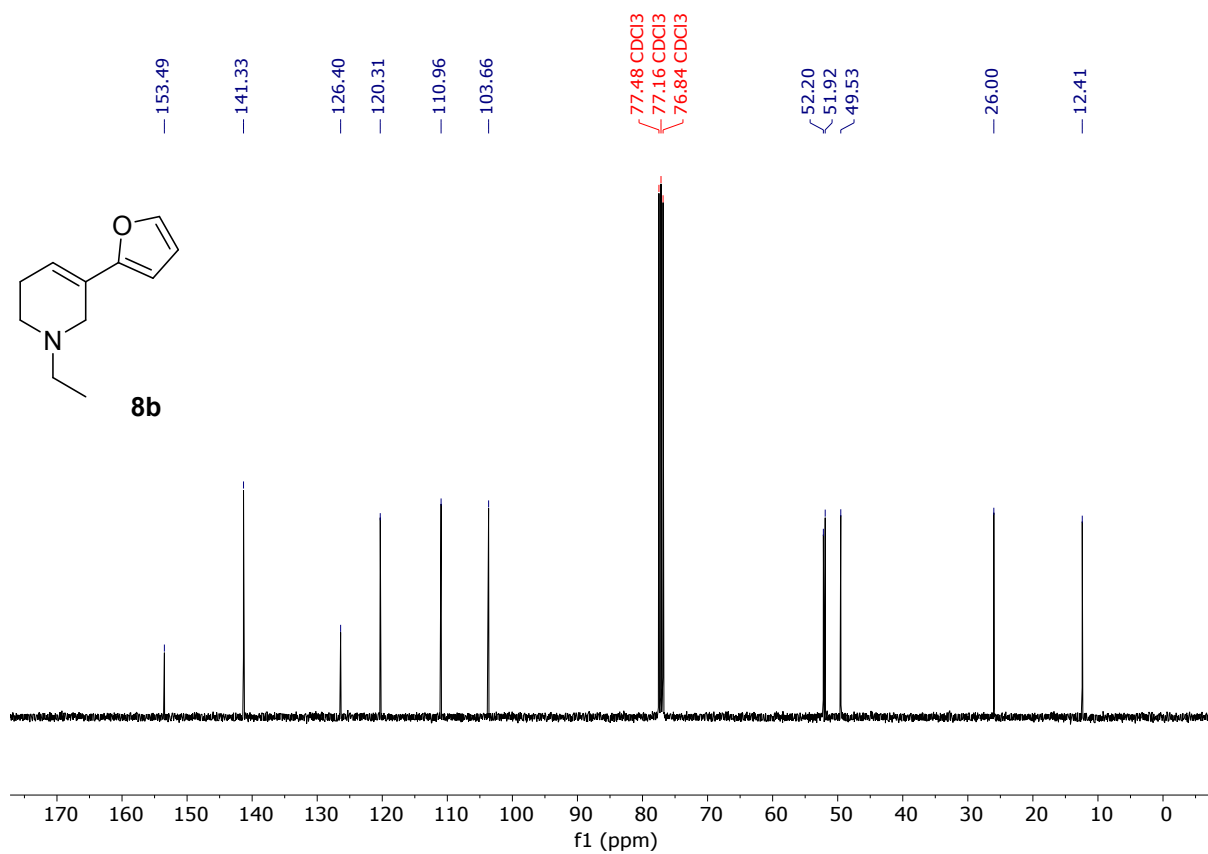

**<sup>1</sup>H & <sup>13</sup>C NMR spectra for 1-ethyl-5-(thiophen-2-yl)-1,2,3,6-THP (9b)**

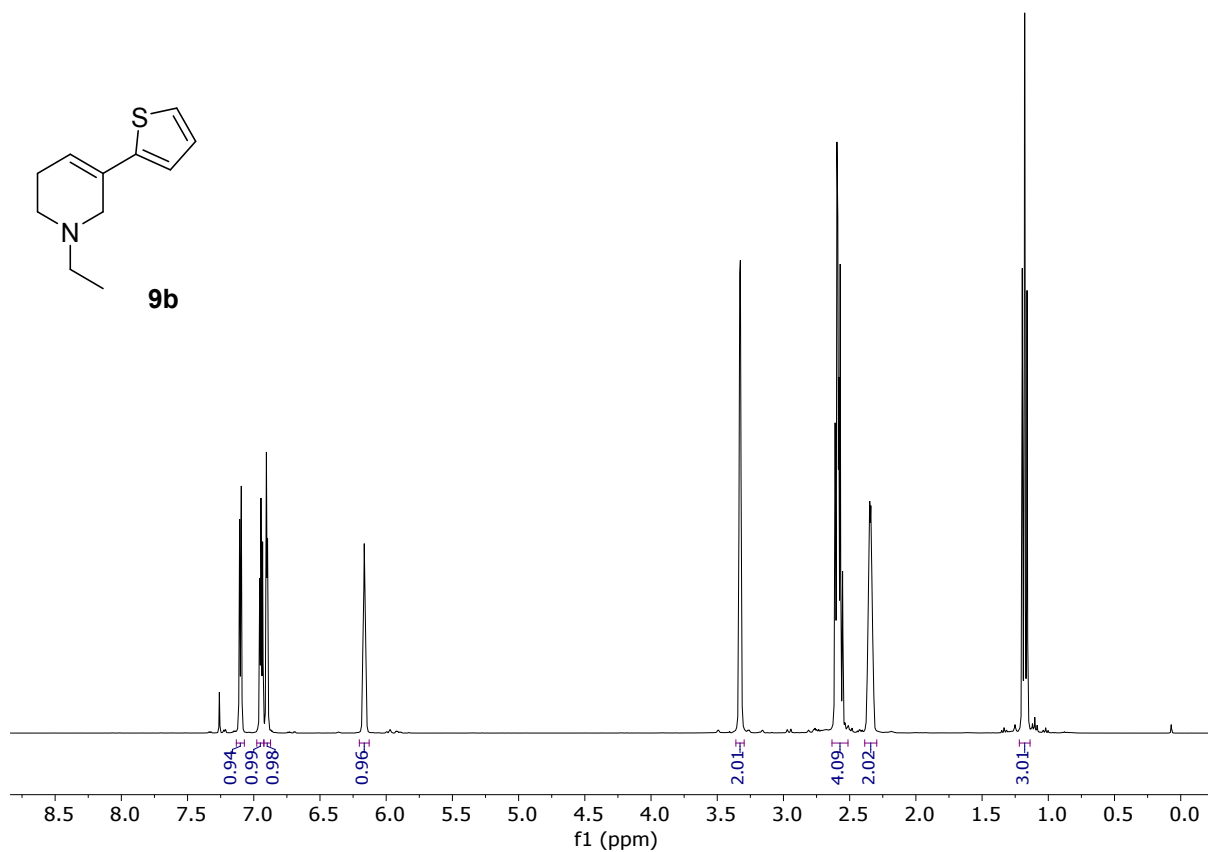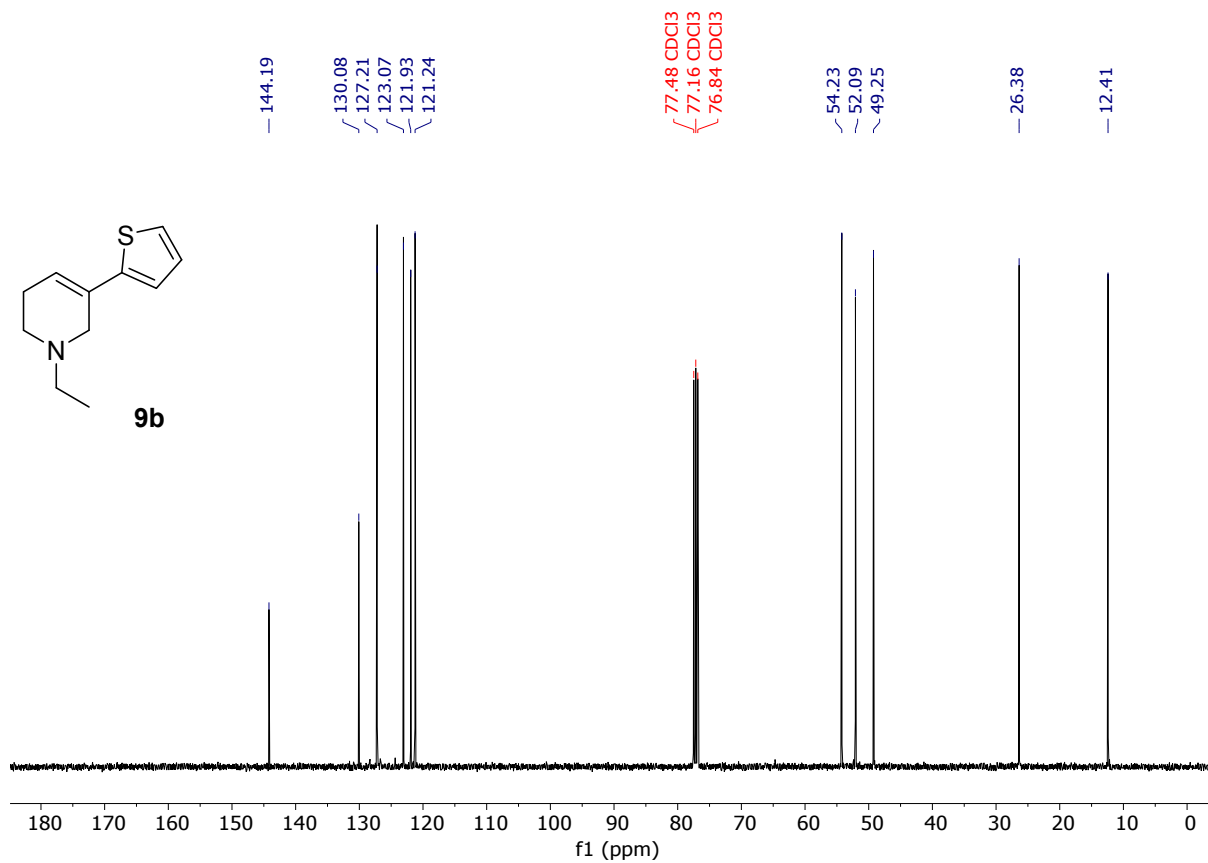

**<sup>1</sup>H & <sup>13</sup>C NMR spectra for 1-ethyl-5-(naphthalen-2-yl)-1,2,3,6-THP (10b)**

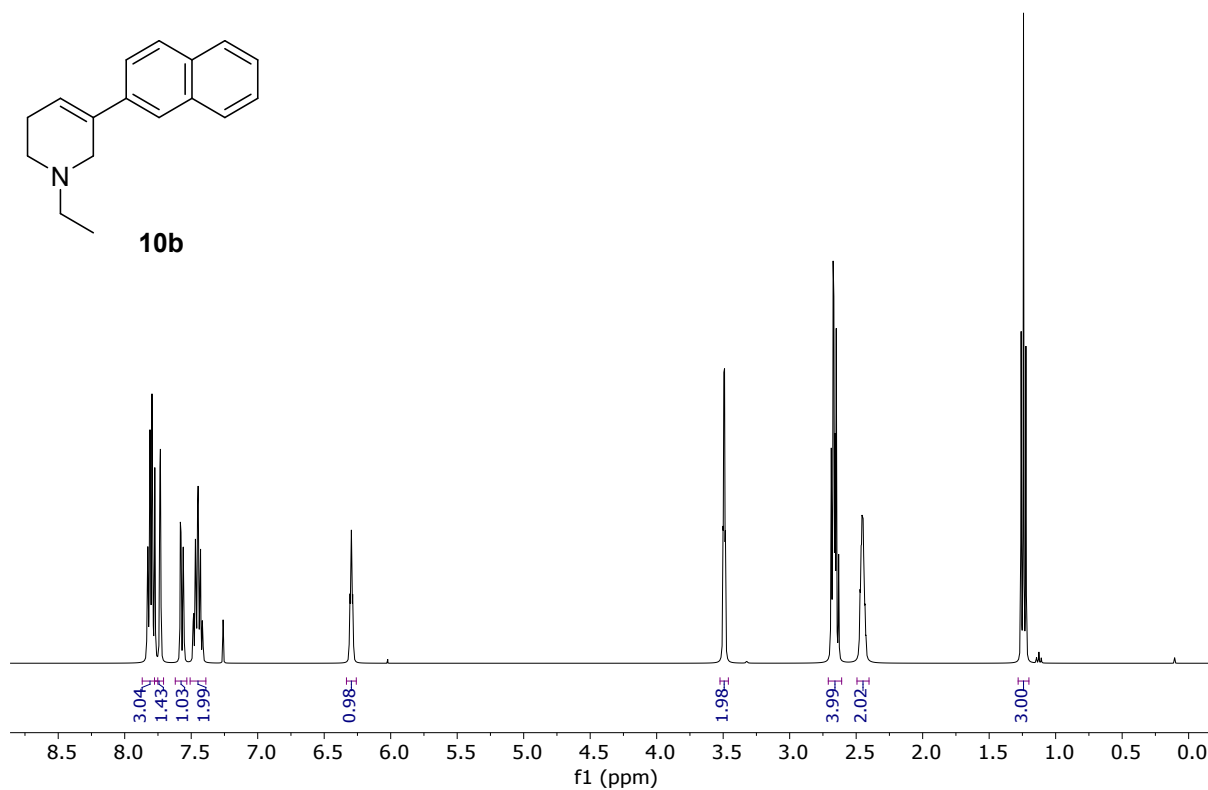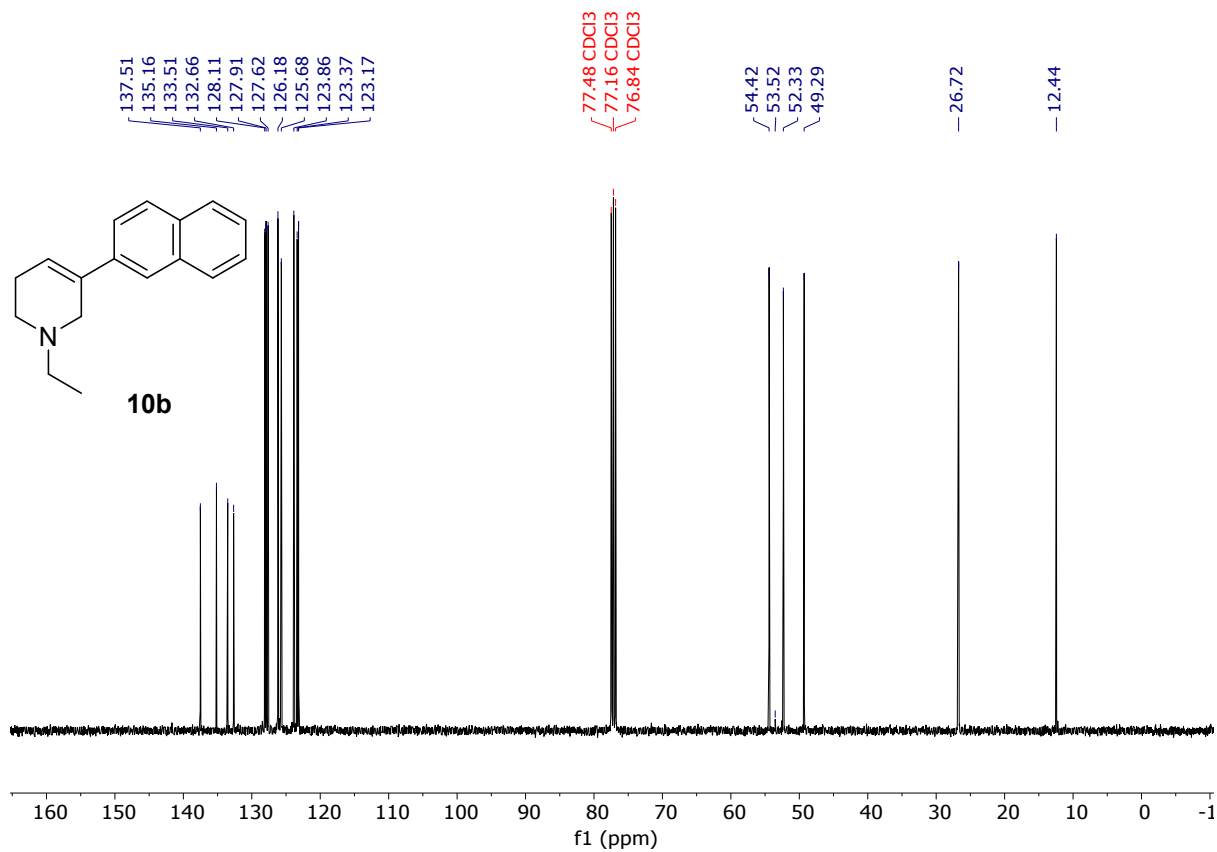

**<sup>1</sup>H & <sup>13</sup>C NMR spectra for 1-methyl-5-phenyl-1,2,3,6-THP (11b)**

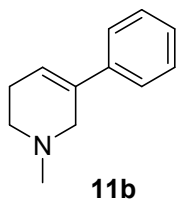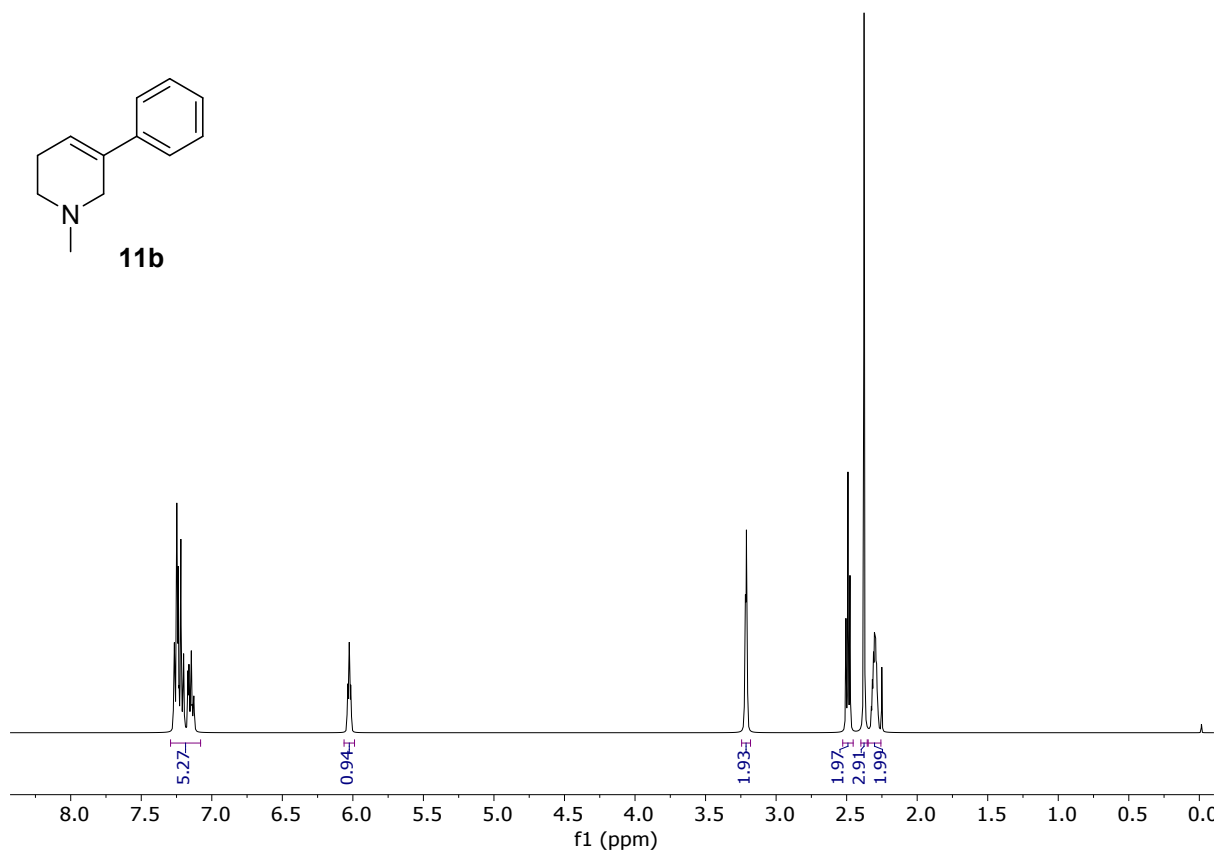

140.17

135.41

128.44

127.14

125.11

122.24

77.48 CDCl<sub>3</sub>

77.16 CDCl<sub>3</sub>

76.84 CDCl<sub>3</sub>

56.48

51.60

46.09

26.64

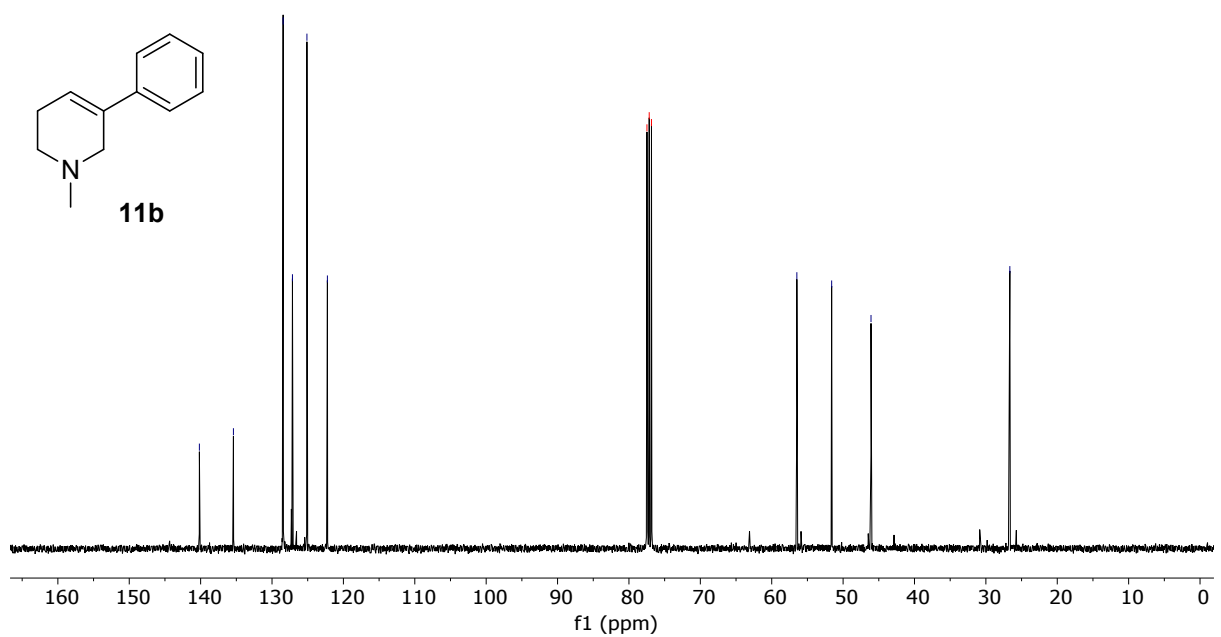

**<sup>1</sup>H & <sup>13</sup>C NMR spectra for 5-phenyl-1-(prop-2-yn-1-yl)-1,2,3,6-THP (12b)**

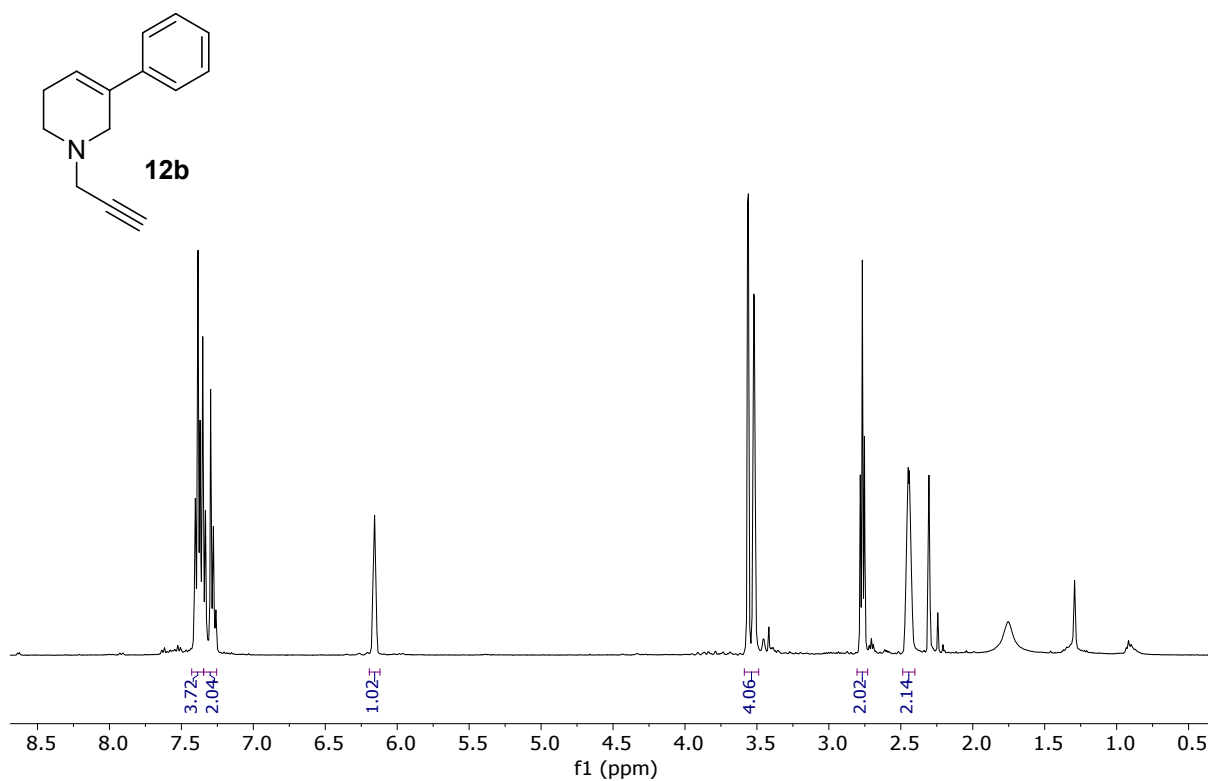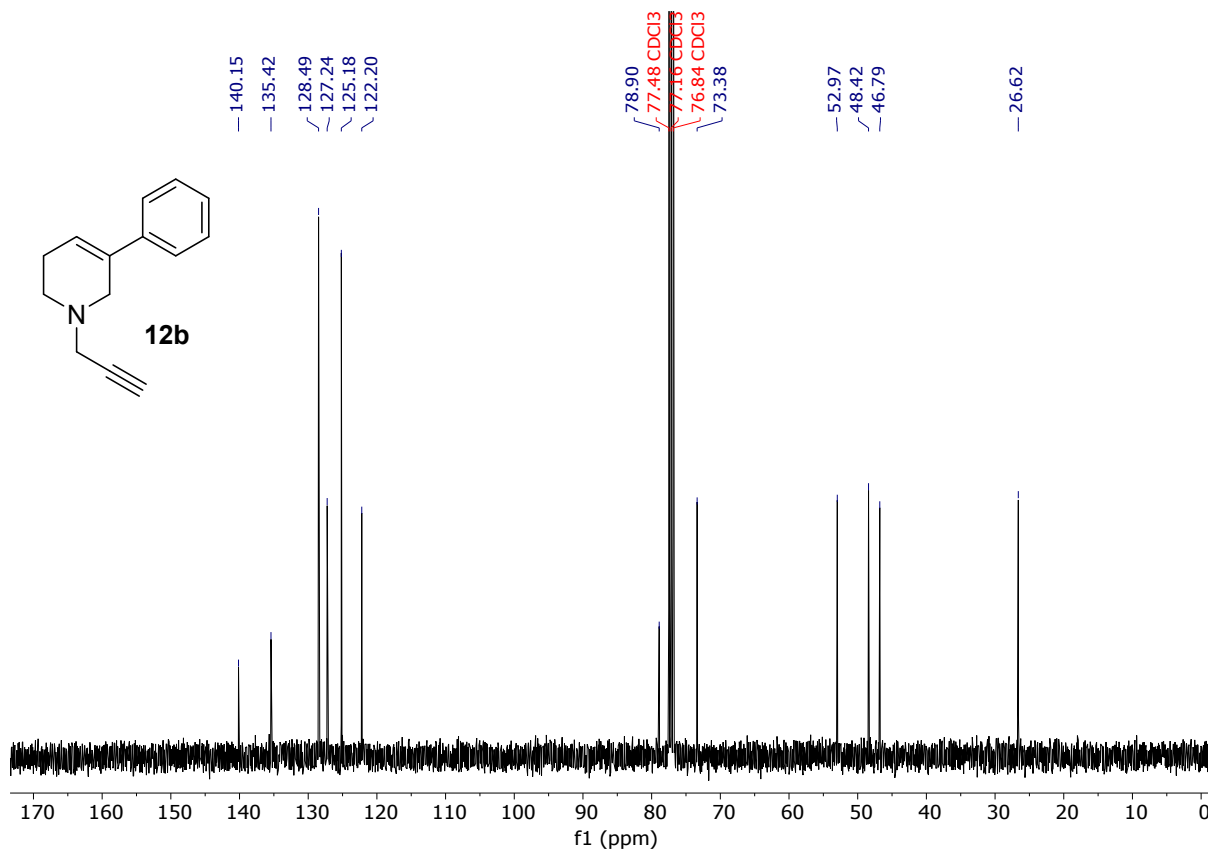

**<sup>1</sup>H & <sup>13</sup>C NMR spectra for 1-ethyl-5-methyl-1,2,3,6-THP (13b)**

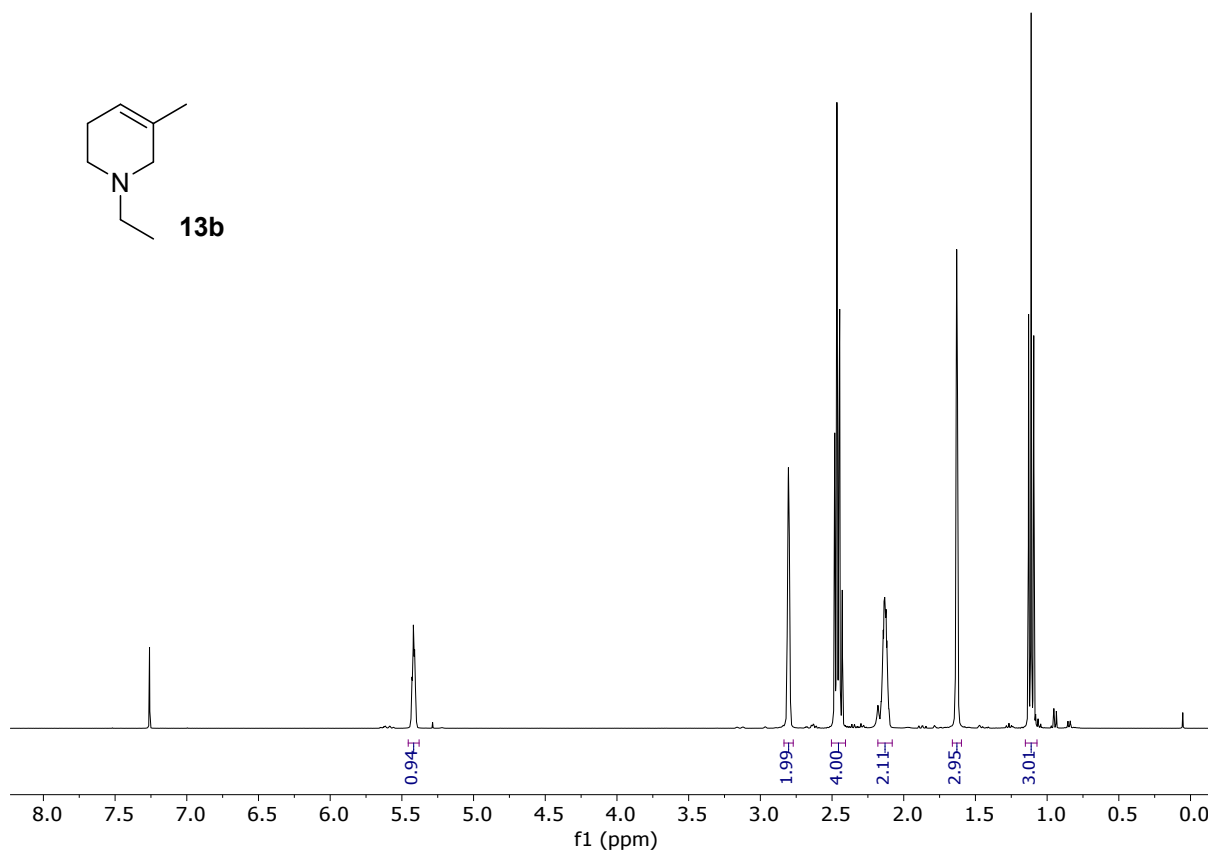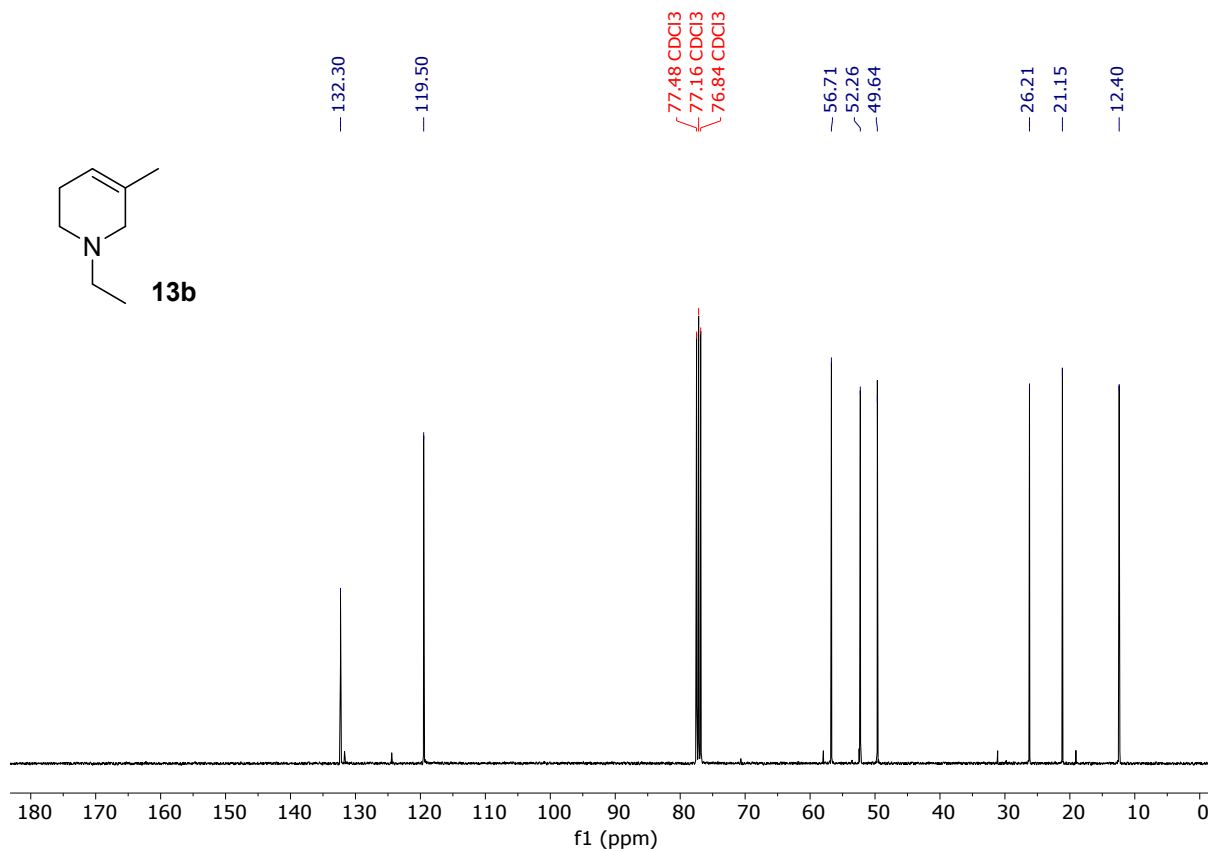



**<sup>1</sup>H & <sup>13</sup>C NMR spectra for 1-benzyl-5-methyl-1,2,3,6-THP (14b)**

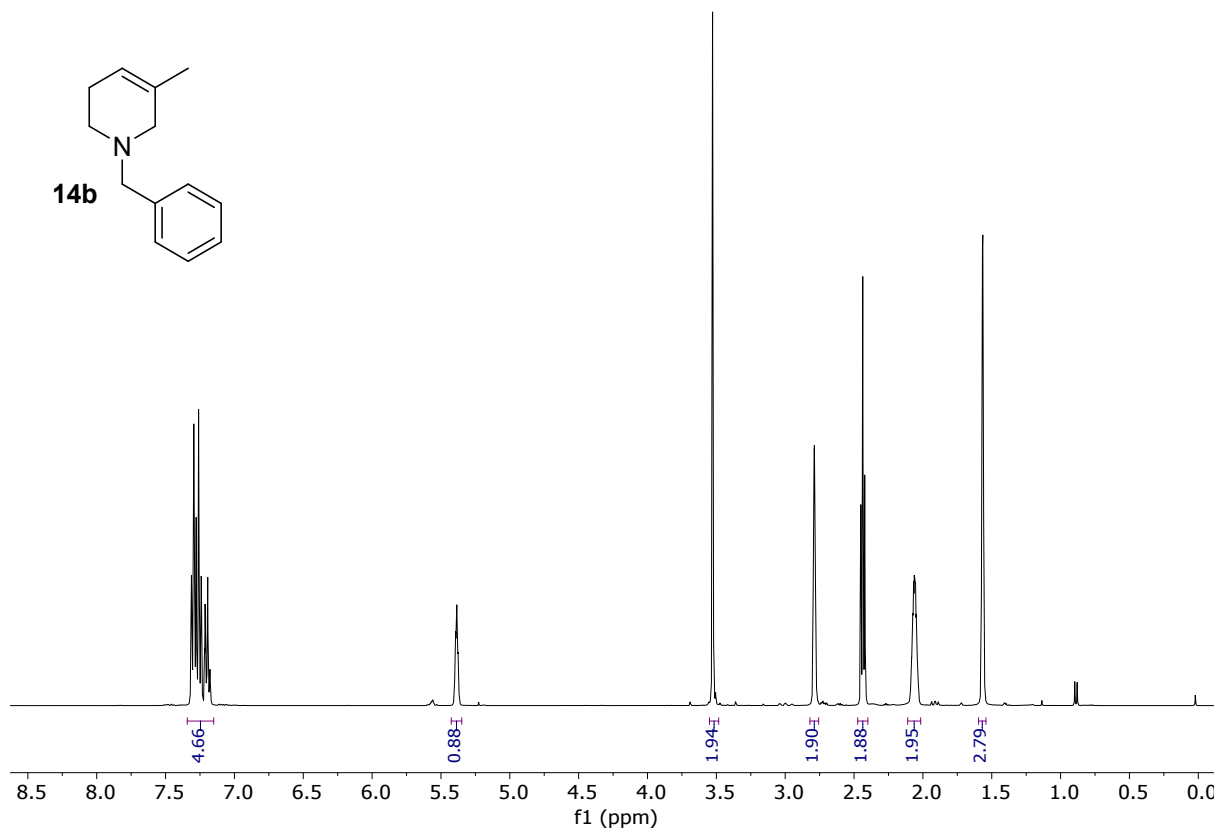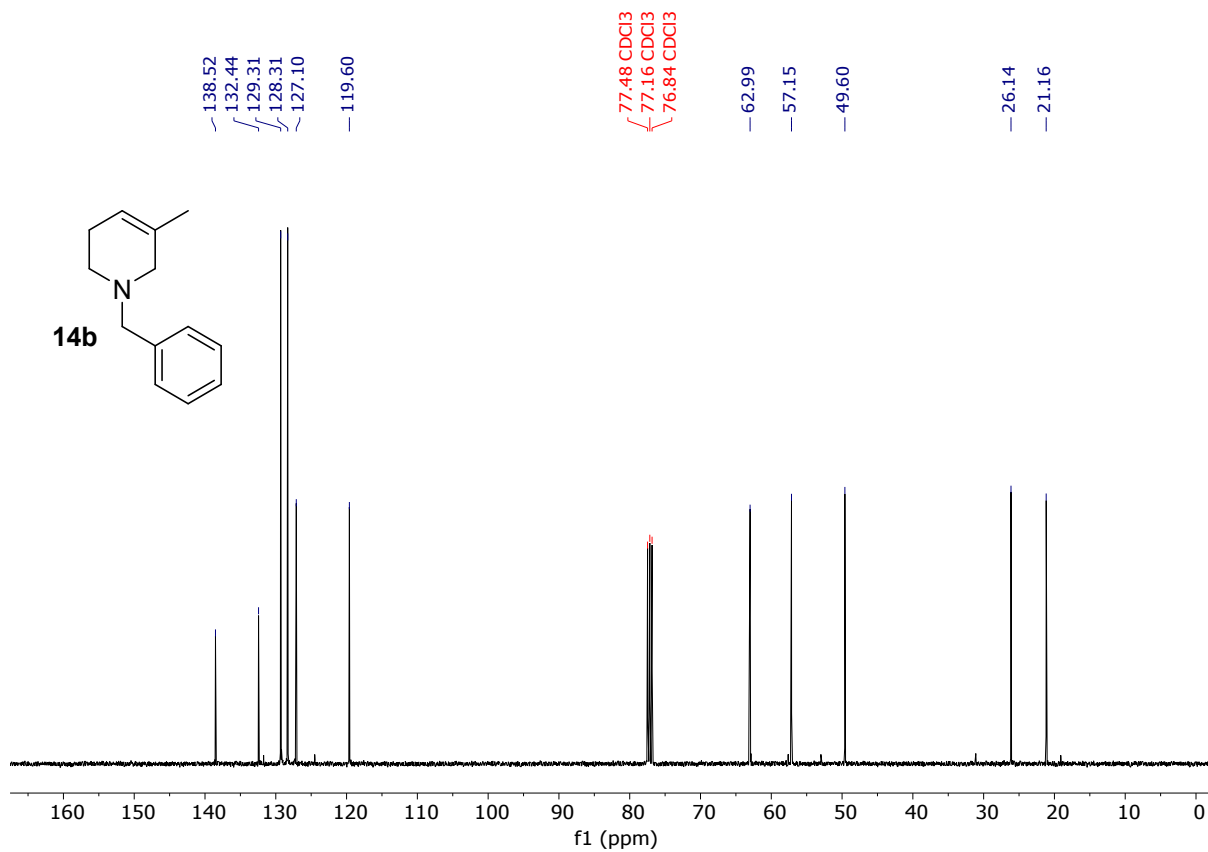

**<sup>1</sup>H & <sup>13</sup>C NMR spectra for 1-ethyl-4-methyl-1,2,3,6-THP (15b)**

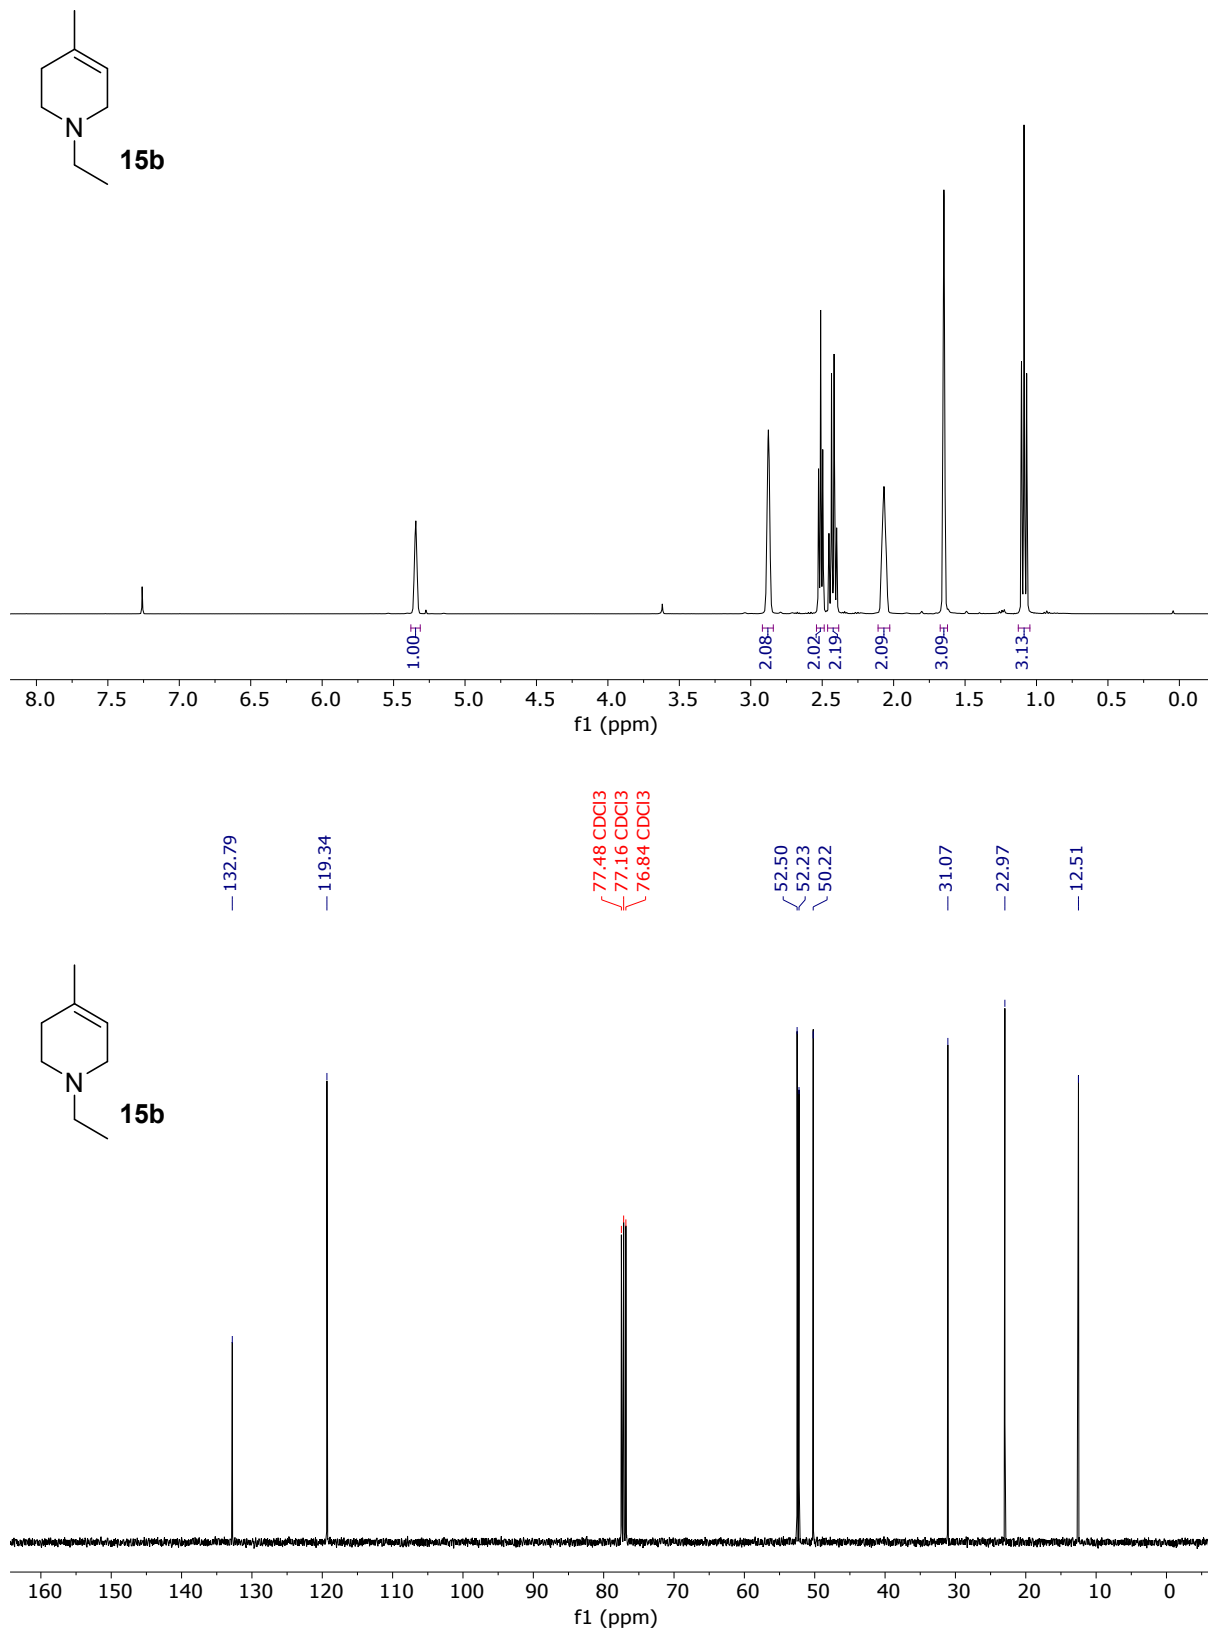

**<sup>1</sup>H & <sup>13</sup>C NMR spectra for 1-ethyl-4-phenyl-1,2,3,6-THP (16b)**

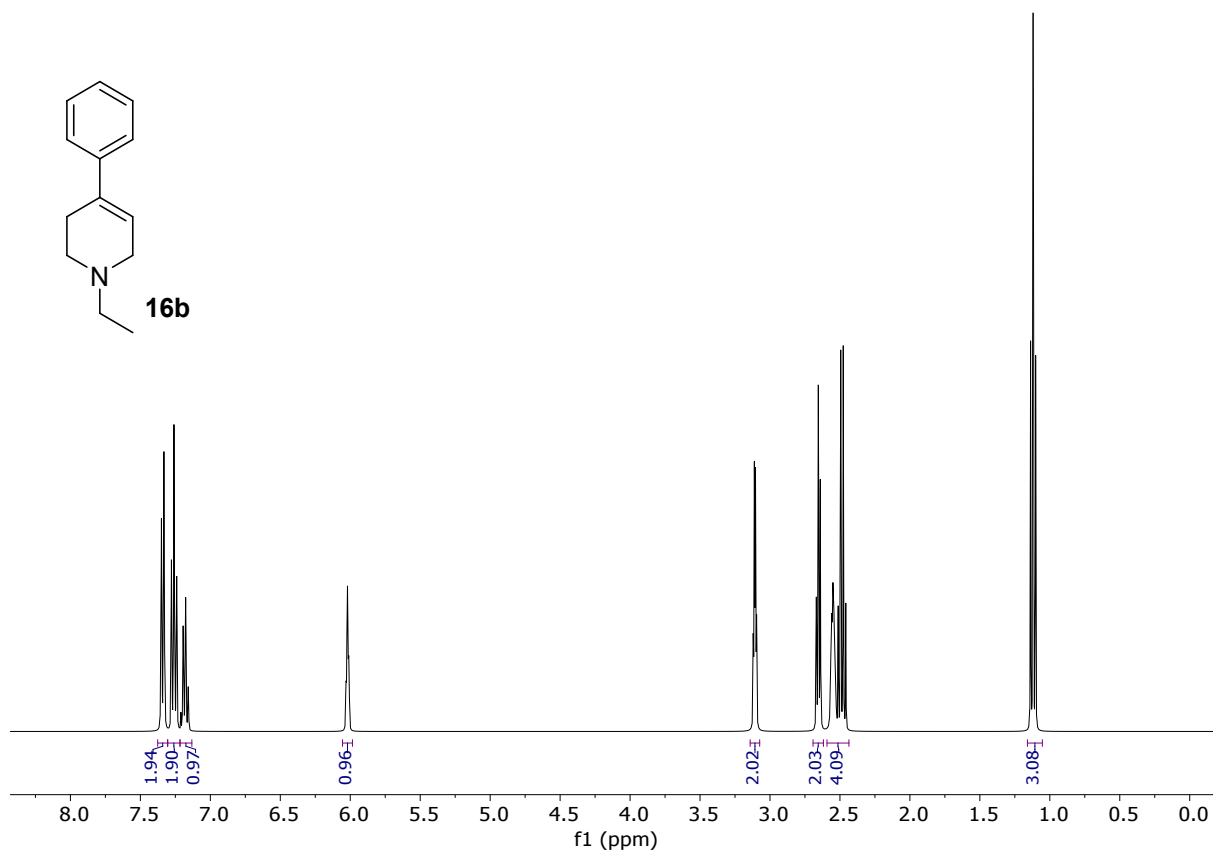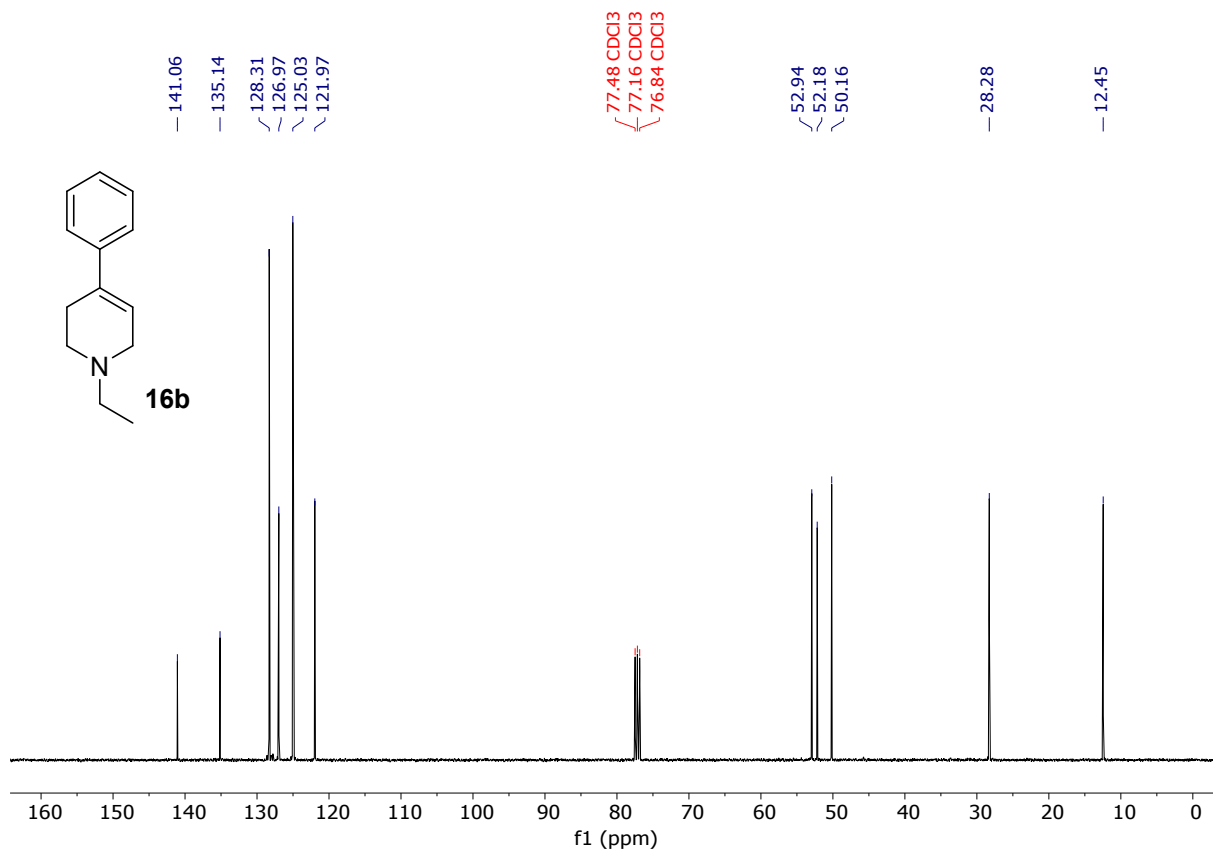

**<sup>1</sup>H & <sup>13</sup>C NMR spectra for 1-ethyl-4,5-dimethyl-1,2,3,6-THP (17b.HCl salt)**

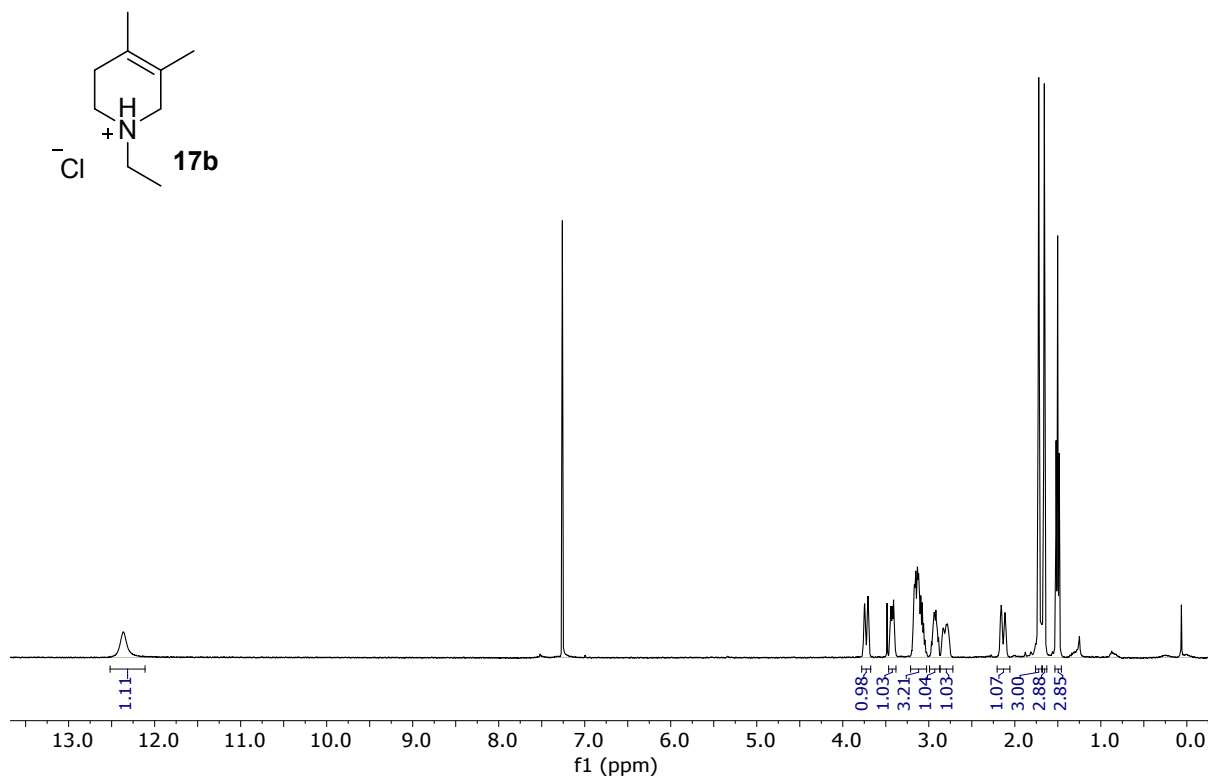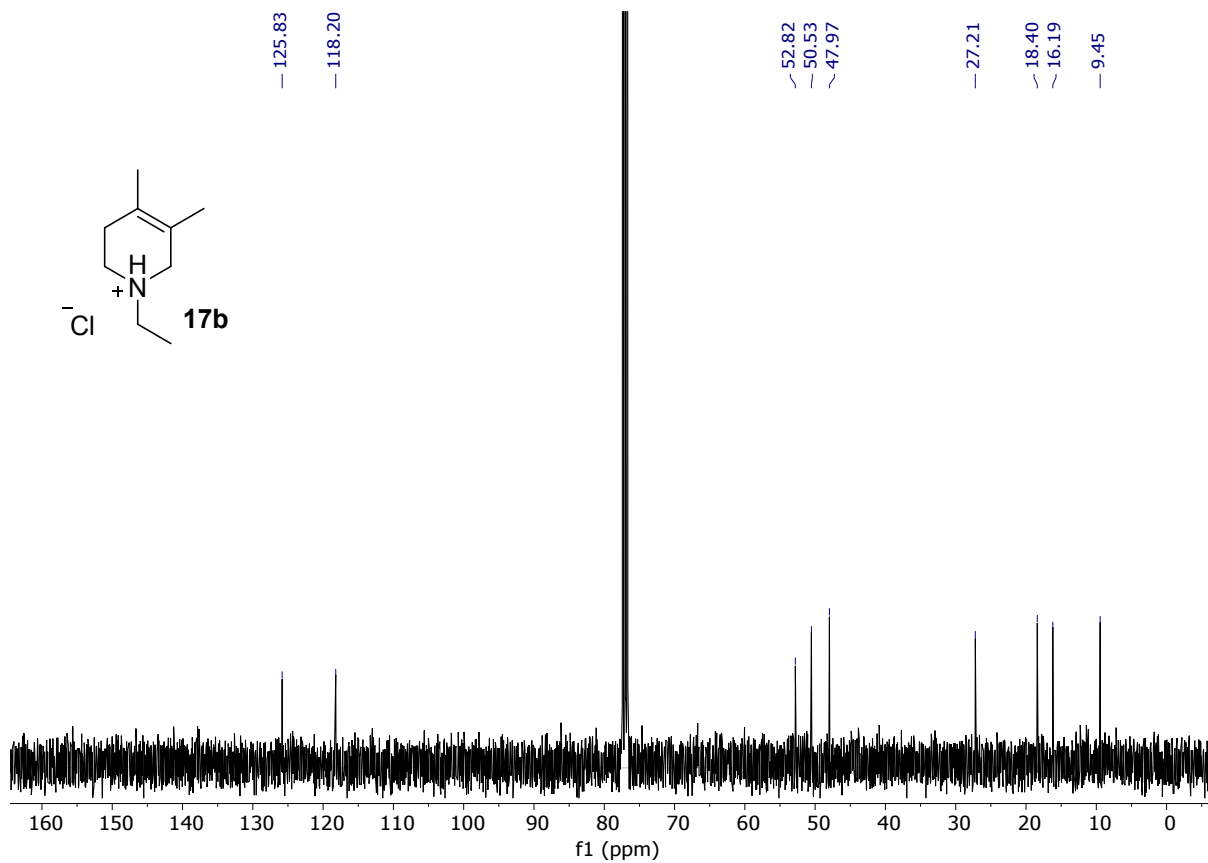

**<sup>1</sup>H & <sup>13</sup>C NMR spectra for 2-ethyl-1,2,3,4,5,6,7,8-octahydroisoquinoline (18b)**

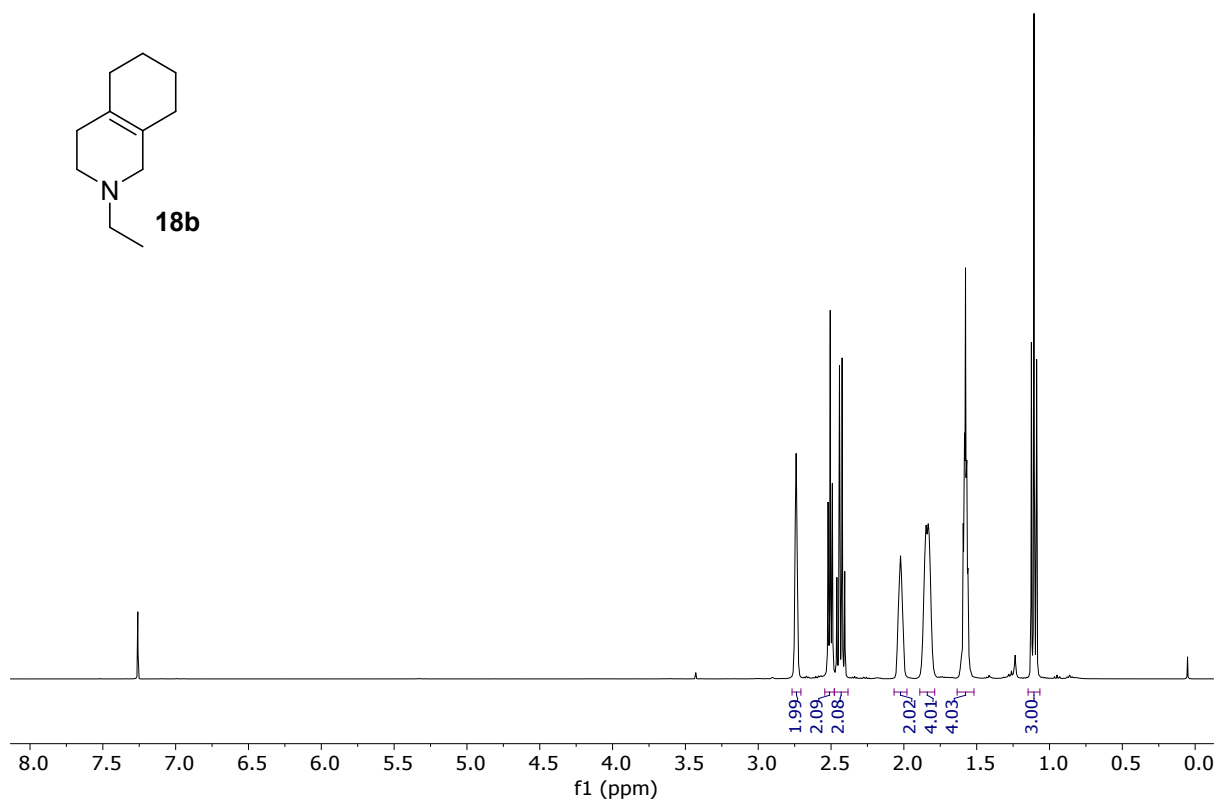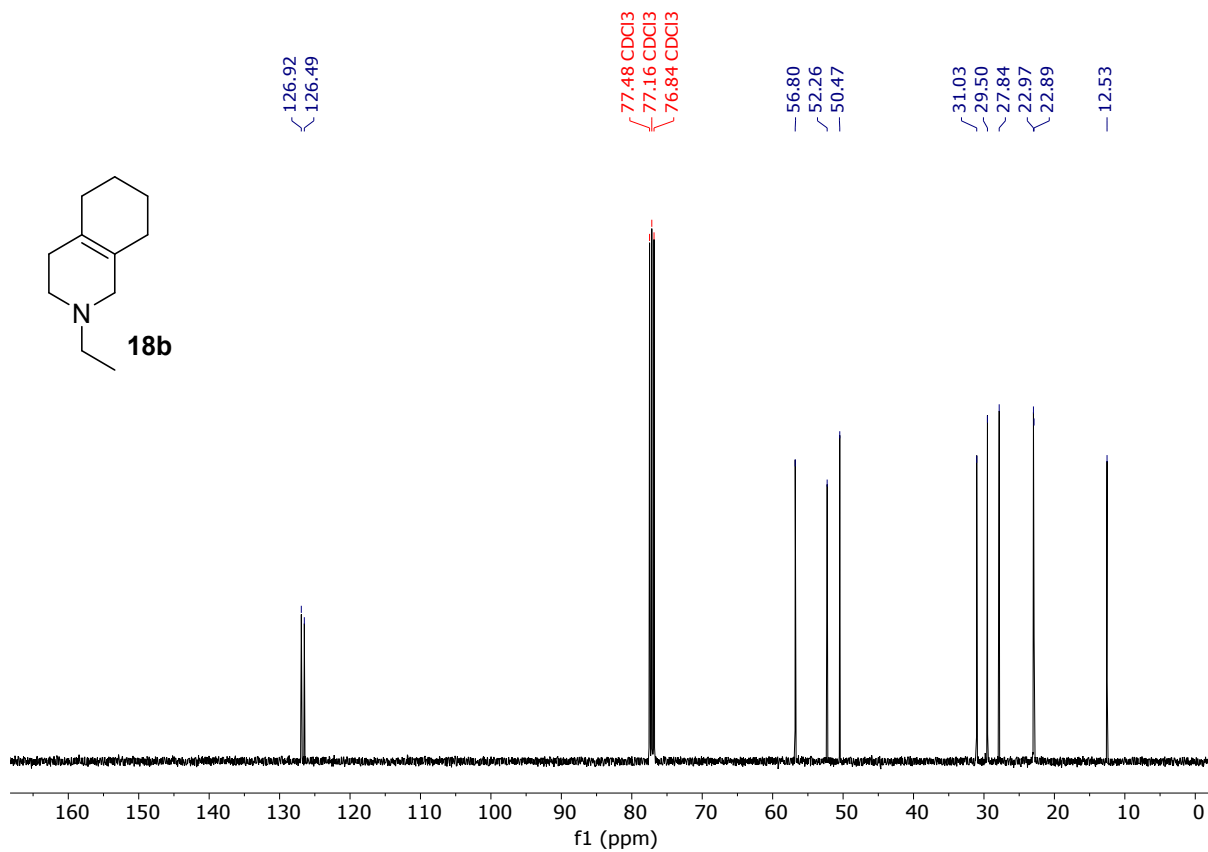

**<sup>1</sup>H & <sup>13</sup>C NMR spectra for 1-ethyl-4-methyl-5-phenyl-1,2,3,6-THP (19b)**

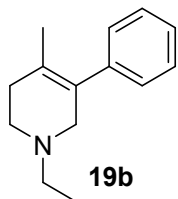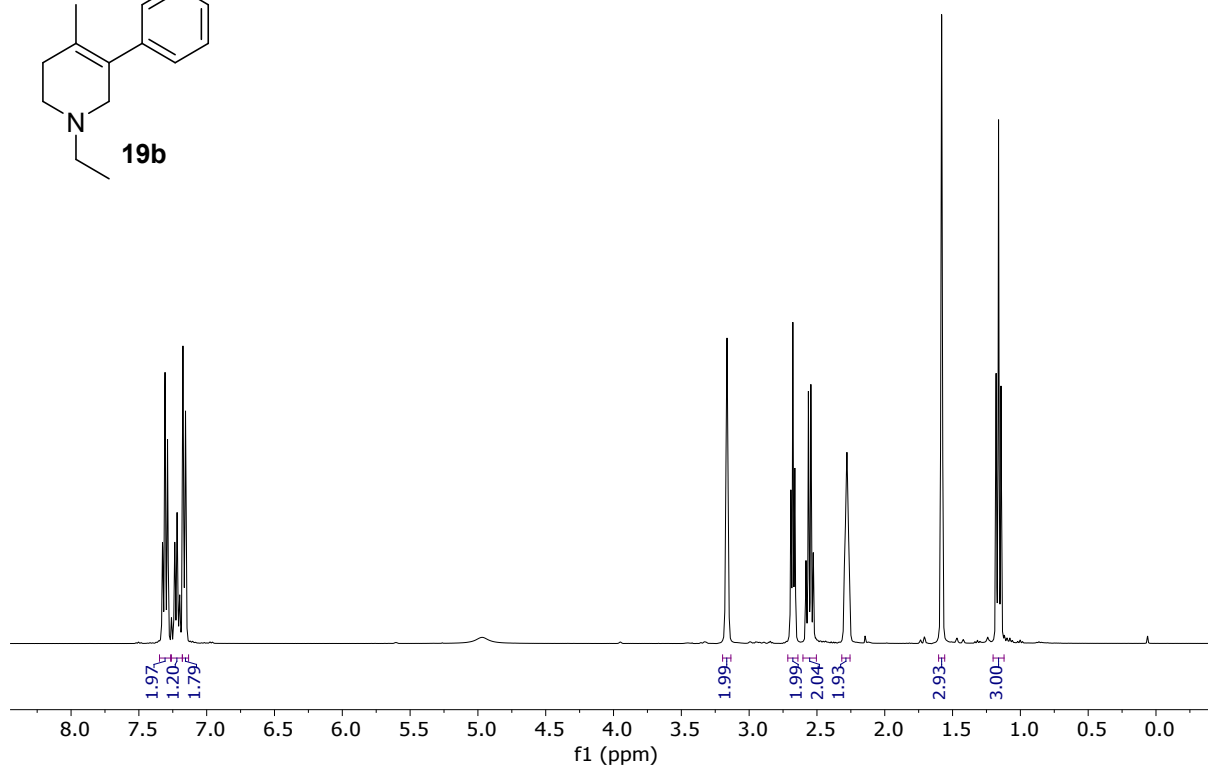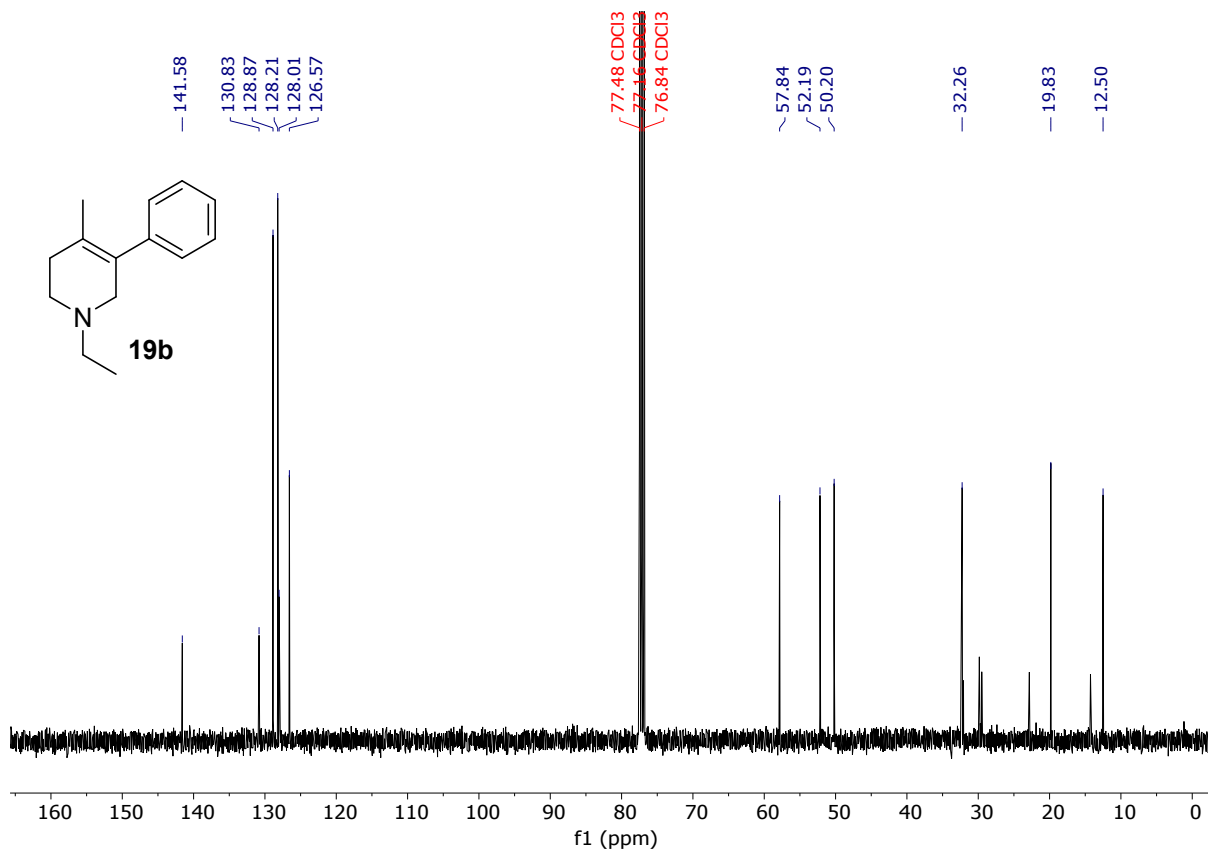

**<sup>1</sup>H & <sup>13</sup>C NMR spectra for 1-allyl-4-methyl-5-phenyl-1,2,3,6-THP (20b)**

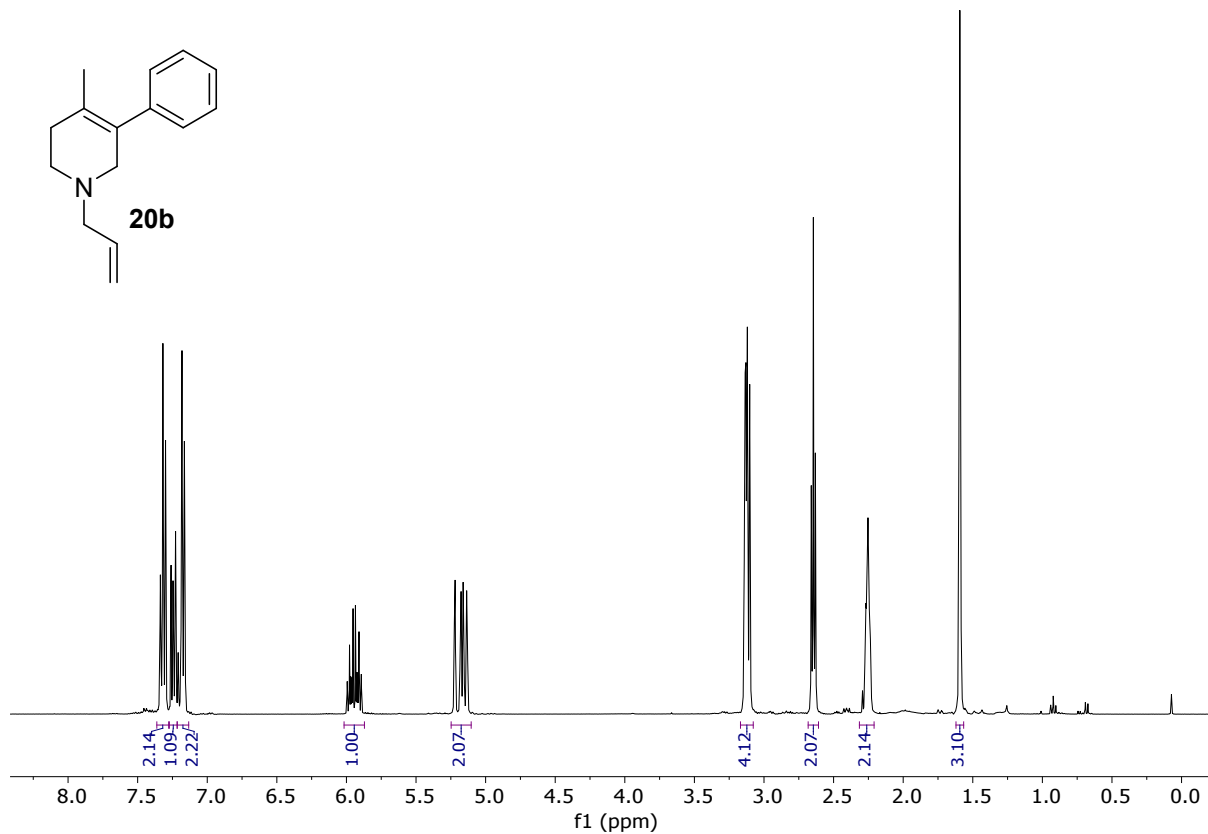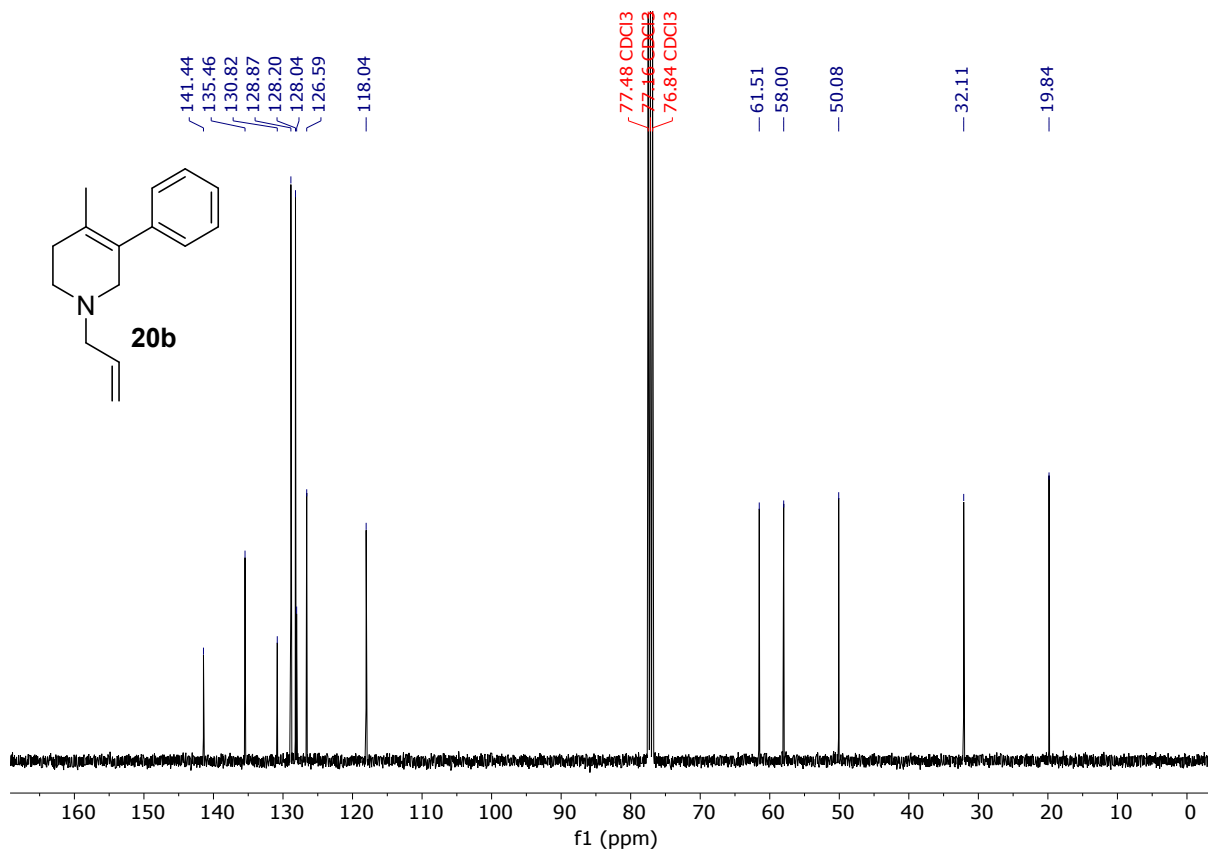

**<sup>1</sup>H & <sup>13</sup>C NMR spectra for 1-allyl-5-methyl-4-phenyl-1,2,3,6-THP (21b)**

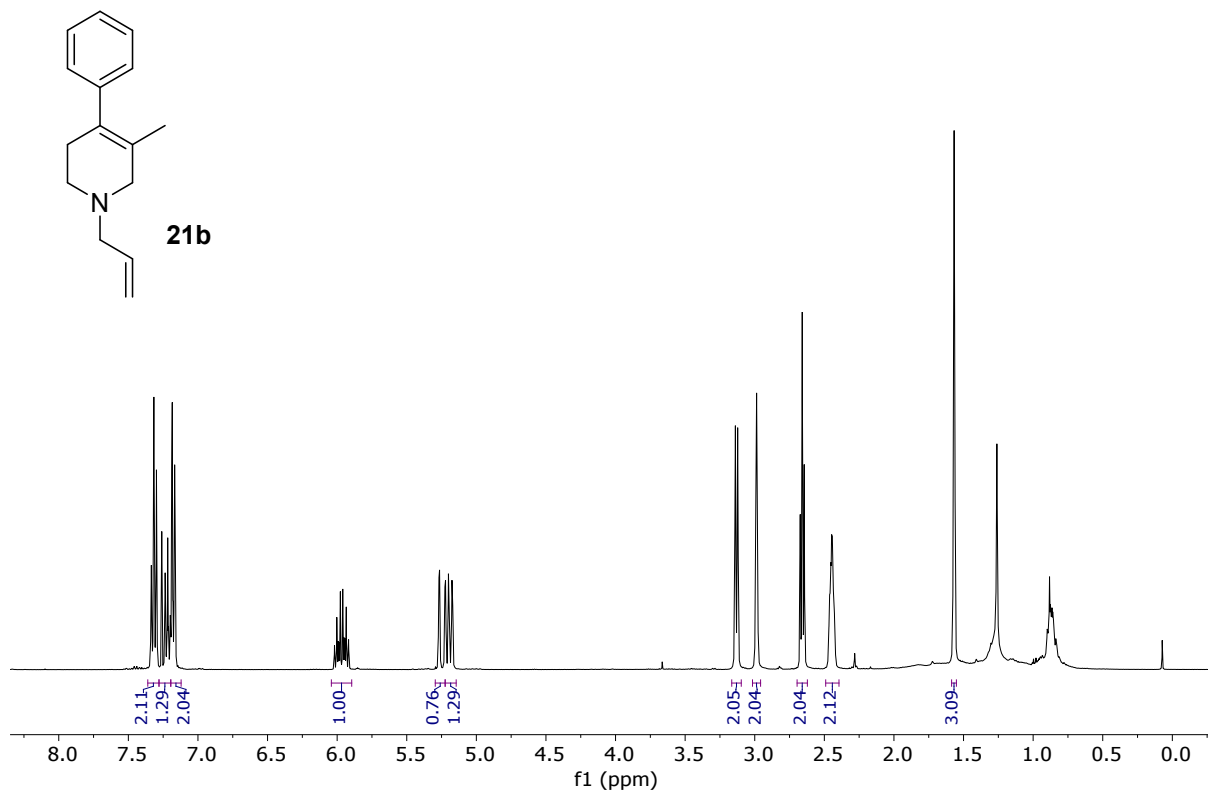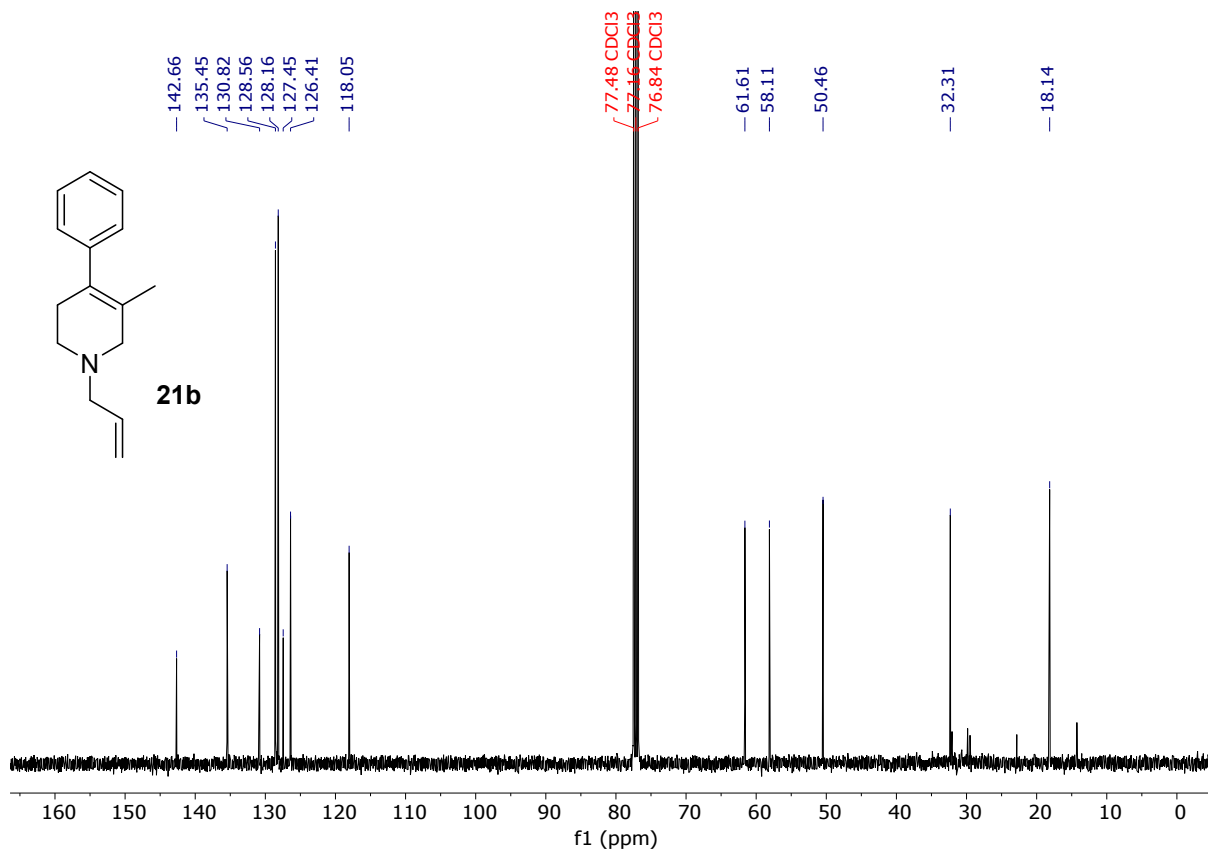



## References

- (1) Thorpe, T.W.; Marshall, J.R.; Harawa, V.; Ruscoe, R.E.; Cuetos, A.; Finnigan, J.D.; Angelastro, A.; Heath, R.S.; Parmeggiani, F.; Charnock, S.J.; Howard, R.M.; Daniels, D.S.B.; Grogan, G.; Turner, N.J. Multifunctional Biocatalyst for Conjugate Reduction and Reductive Amination. *Nature* **2022**, 604, 86–91.
- (2) Chung, C. K.; Bulger, P. G.; Kosjek, B.; Belyk, K. M.; Rivera, N.; Scott, M. E.; Humphrey, G. R.; Limanto, J.; Bachert, D. C.; Emerson, K. M. Process Development of C–N Cross-Coupling and Enantioselective Biocatalytic Reactions for the Asymmetric Synthesis of Niraparib. *Org. Process Res. Dev.* **2014**, 18 (1), 215–227.
- (3) Jones, P.; Altamura, S.; Boueres, J.; Ferrigno, F.; Fonsi, M.; Giomini, C.; Lamartina, S.; Monteagudo, E.; Ontoria, J. M.; Orsale, M. V.; Palumbi, M. C.; Pesci, S.; Roscilli, G.; Scarpelli, R.; Schultz-Fademrecht, C.; Toniatti, C.; Rowley, M. Discovery of 2-{4-[(3S)-Piperidin-3-yl]phenyl}-2H-Indazole-7-Carboxamide (MK-4827): A Novel Oral Poly(ADP-Ribose)Polymerase (PARP) Inhibitor Efficacious in BRCA-1 and -2 Mutant Tumors. *J. Med. Chem.* **2009**, 52 (22), 7170–7185.
- (4) Atkin, K. E.; Reiss, R.; Koehler, V.; Bailey, K. R.; Hart, S.; Turkenburg, J. P.; Turner, N. J.; Brzozowski, A. M.; Grogan, G. The Structure of Monoamine Oxidase from *Aspergillus Niger* Provides a Molecular Context for Improvements in Activity Obtained by Directed Evolution. *J. Mol. Biol.* **2008**, 384 (5), 1218–1231.
- (5) Rowles, I.; Malone, K. J.; Etchells, L. L.; Willies, S. C.; Turner, N. J. Directed Evolution of the Enzyme Monoamine Oxidase (MAO-N): Highly Efficient Chemo-Enzymatic Deracemisation of the Alkaloid (±)-Crispinea. *ChemCatChem* **2012**.
- (6) Ghislieri, D.; Green, A. P.; Pontini, M.; Willies, S. C.; Rowles, I.; Frank, A.; Grogan, G.; Turner, N. J. Engineering an Enantioselective Amine Oxidase for the Synthesis of Pharmaceutical Building Blocks and Alkaloid Natural Products. *J. Am. Chem. Soc.* **2013**, 135 (29), 10863–10869.
- (7) Kabsch, W. XDS. *Acta Crystallogr. Sect. D Biol. Crystallogr.* **2010**, 66 (2), 125–132.
- (8) Evans, P. Scaling and Assessment of Data Quality. *Acta Crystallogr. Sect. D Biol. Crystallogr.* **2006**, 62 (1), 72–82.
- (9) Winter, G. Xia2: An Expert System for Macromolecular Crystallography Data Reduction. *J. Appl. Crystallogr.* **2010**, 43 (1), 186–190.
- (10) Vagin, A.; Teplyakov, A. MOLREP: An Automated Program for Molecular Replacement. *J. Appl. Crystallogr.* **1997**, 30 (6), 1022–1025.
- (11) Lenz, M.; Fademrecht, S.; Sharma, M.; Pleiss, J.; Grogan, G.; Nestl, B. M. New Imine-Reducing Enzymes from  $\beta$ -Hydroxyacid Dehydrogenases by Single Amino Acid Substitutions. *Protein Eng. Des. Sel.* **2018**, 31 (4), 109–120.
- (12) Emsley, P.; Cowtan, K. Coot: Model-Building Tools for Molecular Graphics. *Acta Crystallogr. Sect. D Biol. Crystallogr.* **2004**, 60 (12), 2126–2132.
- (13) Murshudov, G. N.; Vagin, A. A.; Dodson, E. J. Refinement of Macromolecular Structures by the Maximum-Likelihood Method. *Acta Crystallogr. Sect. D Biol. Crystallogr.* **1997**, 53 (3), 240–255.
- (14) Trott, O.; Olson, A. J. AutoDock Vina: Improving the Speed and Accuracy of Docking with a New Scoring Function, Efficient Optimization, and Multithreading. *J. Comput. Chem.* **2010**, 31, 455–461.
- (15) Yang, J.; Liu, S.; Zheng, J.-F.; Zhou, J. S. Room-Temperature Suzuki-Miyaura Coupling of Heteroaryl Chlorides and Tosylates. *European J. Org. Chem.* **2012**, 2012 (31), 6248–6259.
- (16) Baldwin, J. E.; Bischoff, L.; Claridge, T. D. W.; Heupel, F. A.; Spring, D. R.; Whitehead, R. C. An Approach to the Manzamine Alkaloids Modelled on a Biogenetic Theory. *Tetrahedron*

- 1997**, 53 (6), 2271–2290.
- (17) Renom-Carrasco, M.; Gajewski, P.; Pignataro, L.; de Vries, J. G.; Piarulli, U.; Gennari, C.; Lefort, L. Asymmetric Hydrogenation of 3-Substituted Pyridinium Salts. *Chem. - A Eur. J.* **2016**, 22 (28), 9528–9532.
